# Supplementary material
Source: publisher figshare collection journal article supplement (https://gsapubs.figshare.com/ndownloader/files/22409829)
Supplement: Supplementary file 1 [file 22409829]

## Sheet: Sample locations
Mauléon Basin sample locations
Sample	Latitude (N)	Longitude (E)	Elevation (m)
12WPY01	43°12'19.8''	01°19'38.1"	125
12WPY05	43°13'50.0''	01°18'06.7"	113
12WPY06	43°13'04.8''	01°19'24.6"	268
12WPY07	43°13'32.5''	01°15'20.4"	375
12WPY08	43°18'08.7''	01°14'25.5"	305
12WPY10	43°21'11.9''	01°20'11.8"	379
12WPY11	43°21'36.9''	01°19'30.8"	274
12WPY12	43°20'18.8''	01°19'52.8"	430
12WPY13	43°21'48.66"	01°17'32.33"	103
12WPY18	43°18'54.5''	01°15'35.7"	203
12WPY19	43°11'59.4''	01°17'30.7"	807
12WPY20	43°02'16.3''	01°01'39.4"	1295
12WPY21	43°02'24.3''	01°01'39.2"	1363
12WPY23	43°02'41.5''	01°01'25.5"	1221
12WPY24	43°03'04.4''	01°00'55.9"	1169
12WPY25	43°03'31.1''	01°01'08.3"	1180
12WPY26	43°04'08.0''	01°01'19.8"	1035
12WPY27	43°04'19.7''	01°01'16.6"	898
12WPY28	43°04'20.5''	01°01'12.0"	900
12WPY30	43°09'01.3''	01°17'16.6"	373
12WPY31	43°09'02.0''	01°17'38.8"	467
12WPY32	43°08'52.2''	01°17'44.6"	538
12WPY33	43°08'29.3''	01°17'30.5"	744
12WPY35	43°08'21.4''	01°17'48.7"	806
12WPY36	43°08'27.4''	01°18'06.5"	903
12WPY38	43°07'56.2''	01°19'06.3"	902
12WPY41	43°17'28.2''	01°17'31.9"	881
12WPY42	43°17'41.1''	01°17'28.9"	803
12WPY43	43°17'51.6''	01°17'47.8"	596
12WPY44	43°18'00.4''	01°17'37.9"	534
12WPY45	43°15'26.2''	01°19'09.3"	96
12WPY46	43°16'11.9''	01°18'59.2"	416
12WPY47	43°16'34.5''	01°19'02.2"	316
12WPY48	43°19'37.6''	01°23'21.7"	67
12WPY49	43°15'20.4''	01°15'38.1"	179
12WPY54	43°20'55.6''	01°14'15.3"	153
12WPY55	43°20'20.1''	01°14'36.2"	466
12WPY56	43°20'14.2''	01°14'31.0"	466
12WPY57	43°18'27.6''	01°00'33.2"	64
12WPY58	43°15'28.4''	01°02'30.9"	100
12WPY59	43°12'49.8''	01°07'55.1"	199
13WPY01	43°09'08.5''	01°24'55.0"	1089
13WPY02	43°09'13.2''	01°24'33.8"	952
13WPY04	43°07'44.9''	01°19'41.6"	939
13WPY05	43°19'33.2''	01°16'10.3"	212
13WPY06	43°21'40.1''	01°14'12.4"	178
13WPY07	43°20'39.5''	01°19'56.3"	666

## Sheet: U-Pb Granulite
Lower-crustal granulite zircon U-Pb data
Sample_Grain #	[U] ppm	U/Th	207/235	2σ error	206/238	2σ error	RHO	207/235 Age (Ma)	2σ error	206/238 Age (Ma)	2σ error	207/206 Age (Ma)	2σ error	Best age (Ma)	2σ error	% Discordance*	Rim/Core
12WPY08_1	1612	9.3	0.3494	0.0053	0.04375	0.00033	0.4047	304.6	3.9	276	2	509	27	276	2	9.38936	Single Age
12WPY08_2	1688	41.9	0.392	0.01	0.04651	0.00052	0.38712	335.4	7.3	293.1	3.2	620	50	DISC	DISC	12.6118	Single Age
12WPY08_3	1725	19.7	0.3643	0.0041	0.04572	0.00043	0.57609	315.4	3.1	288.2	2.6	519	21	288.2	2.6	8.62397	Single Age
12WPY08_4	1351	142.3	0.334	0.0032	0.04511	0.00045	0.64977	292.6	2.4	284.4	2.8	359	19	284.4	2.8	2.80246	Single Age
12WPY08_5	2500	373	0.3303	0.0026	0.04477	0.00034	0.69204	289.7	2	282.3	2.1	344	13	282.3	2.1	2.55437	Single Age
12WPY08_6	2200	32.5	0.381	0.0075	0.04404	0.00053	0.41339	328.2	5.6	277.8	3.3	702	62	DISC	DISC	15.3565	Single Age
12WPY08_7	1897	78.1	0.505	0.023	0.04733	0.00048	0.62635	413	15	298.1	3	1081	76	DISC	DISC	27.8208	Single Age
12WPY08_8	2410	201.5	0.3454	0.0034	0.04642	0.00037	0.6537	301.2	2.6	292.5	2.3	360	16	292.5	2.3	2.88845	Single Age
12WPY08_9	1525	180.9	0.328	0.003	0.04505	0.00052	0.71097	288	2.3	284	3.2	310	19	284	3.2	1.38889	Single Age
12WPY08_10	2030	69	0.403	0.016	0.0491	0.0012	0.85991	343	11	308.6	7.1	573	44	DISC	DISC	10.0292	Single Age
12WPY08_11	1942	155.2	0.3589	0.0053	0.0469	0.00048	0.70074	311.2	4	295.4	2.9	428	23	295.4	2.9	5.07712	Single Age
12WPY08_12	2670	162	0.3413	0.0038	0.04483	0.00036	0.65445	298.1	2.9	282.7	2.2	419	20	282.7	2.2	5.16605	Single Age
12WPY08_13	1340	109	0.35	0.0072	0.04689	0.0007	0.76886	305.1	5.3	295.4	4.3	384	29	295.4	4.3	3.17929	Single Age
12WPY08_14	1440	40	0.3467	0.0064	0.04624	0.00047	0.54738	302.1	4.8	291.4	2.9	371	32	291.4	2.9	3.54187	Single Age
12WPY08_15	1980	65	0.3584	0.0097	0.04428	0.00039	0.27475	310.5	7.2	279.3	2.4	551	57	DISC	DISC	10.0483	Single Age
12WPY08_16	2690	22.8	0.457	0.021	0.04416	0.00067	0.61869	382	15	278.5	4.1	1047	77	DISC	DISC	27.0942	Single Age
12WPY08_17	2101	29.8	0.4035	0.0087	0.04443	0.00065	0.41574	343.9	6.3	280.2	4	785	41	DISC	DISC	18.5228	Single Age
12WPY08_18	1057	148	0.3389	0.0028	0.0471	0.00041	0.50675	296.3	2.1	296.7	2.5	300	18	296.7	2.5	0.134998	Single Age
12WPY08_19	1308	37.6	0.3766	0.0099	0.04454	0.00077	0.066919	324.9	7.4	280.9	4.7	633	71	DISC	DISC	13.5426	Single Age
12WPY08_20	2000	88	0.3668	0.0089	0.04298	0.00045	0.28334	317.6	6.7	271.3	2.8	658	51	DISC	DISC	14.5781	Single Age
12WPY08_21	2080	103.4	0.3666	0.0057	0.04636	0.00059	0.65683	317.5	4.3	292.1	3.7	520	24	292.1	3.7	8	Single Age
12WPY08_22	2050	27.4	0.441	0.018	0.04376	0.00058	0.50315	369	12	276.1	3.6	950	100	DISC	DISC	25.1762	Single Age
12WPY08_23	1534	87.8	0.378	0.0085	0.04803	0.00058	0.65415	326	6.4	302.4	3.6	496	34	302.4	3.6	7.23926	Single Age
12WPY08_24	393	30	0.434	0.037	0.0579	0.004	0.80681	365	26	363	24	443	52	363	24	0.547945	Rim
12WPY08_24	102.2	1.281	0.776	0.014	0.0932	0.0014	0.57265	584.1	7.6	574.6	8.4	609	26	574.6	8.4	1.62643	Core
12WPY08_25	1730	130	0.3554	0.0044	0.04604	0.00052	0.45419	308.7	3.3	290.1	3.2	446	28	290.1	3.2	6.02527	Single Age
12WPY08_26	1567	42	0.3682	0.0083	0.04436	0.00045	0.25368	317.9	6.2	279.8	2.8	594	47	DISC	DISC	11.9849	Single Age
12WPY08_27	946	57.4	0.3473	0.0043	0.04683	0.00056	0.65126	302.6	3.3	295	3.5	372	19	295	3.5	2.51157	Single Age
12WPY08_28	1520	106	0.3396	0.0078	0.0454	0.0011	0.7552	296.7	5.9	286	6.8	382	34	286	6.8	3.60634	Single Age
12WPY08_29	3050	160.2	0.3382	0.008	0.03932	0.00043	0.75573	295.6	6.1	248.6	2.7	700	37	DISC	DISC	15.8999	Single Age
12WPY08_30	2222	59	0.3612	0.007	0.04531	0.00039	0.54485	313.5	5.1	285.7	2.4	521	36	285.7	2.4	8.86762	Single Age
12WPY08_31	2070	11.4	0.4121	0.0049	0.04391	0.00043	0.46412	350.3	3.5	277	2.7	864	25	DISC	DISC	20.9249	Single Age
12WPY08_32	2280	96	0.321	0.0019	0.04417	0.00031	0.72984	282.6	1.4	278.6	1.9	310	14	278.6	1.9	1.41543	Single Age
12WPY08_33	1470	205	0.3188	0.0042	0.04387	0.00057	0.82185	280.8	3.2	276.7	3.5	310	17	276.7	3.5	1.46011	Single Age
12WPY08_34	2106	65.4	0.374	0.01	0.04375	0.00032	0.30321	321.7	7.7	276	2	647	57	DISC	DISC	14.2058	Single Age
12WPY08_35	884	67	0.3478	0.0055	0.04771	0.00075	0.86138	302.9	4.2	300.4	4.6	306	19	300.4	4.6	0.825355	Single Age
12WPY08_36	1449	45.2	0.4302	0.0091	0.0468	0.0004	0.47313	362.9	6.5	294.8	2.5	834	36	DISC	DISC	18.7655	Single Age
12WPY08_37	1670	24.9	0.335	0.0031	0.04445	0.00044	0.62155	293.3	2.3	280.4	2.7	386	19	280.4	2.7	4.39823	Single Age
12WPY08_38	1750	92	0.387	0.01	0.04562	0.00055	0.091601	332.7	7.6	287.5	3.4	626	57	DISC	DISC	13.5858	Single Age
12WPY08_39	1782	90	0.3264	0.0037	0.04321	0.00029	0.427	286.7	2.8	272.7	1.8	403	24	272.7	1.8	4.88315	Single Age
12WPY08_40	1240	140	0.3355	0.0054	0.04589	0.00074	0.87589	293.5	4.1	289.2	4.5	332	17	289.2	4.5	1.46508	Single Age
12WPY08_41	1415	50	0.3455	0.0044	0.04308	0.00033	0.27329	301.3	3.3	271.9	2.1	513	27	271.9	2.1	9.75772	Single Age
12WPY08_42	2920	131.4	0.3914	0.0099	0.04419	0.0005	0.17643	334.9	7.1	278.7	3.1	737	56	DISC	DISC	16.7811	Single Age
12WPY08_43	1480	237	0.3257	0.0032	0.04439	0.00042	0.68099	286.2	2.5	280	2.6	315	18	280	2.6	2.16632	Single Age
12WPY08_44	1392	98.2	0.3651	0.0045	0.04612	0.00044	0.61674	315.9	3.4	290.6	2.7	492	22	290.6	2.7	8.00886	Single Age
12WPY08_45	1940	16.4	0.4129	0.0071	0.04257	0.00067	0.45407	350.7	5.1	268.7	4.2	931	39	DISC	DISC	23.3818	Single Age
12WPY08_46	2840	339	0.3045	0.0025	0.04131	0.00033	0.55683	269.9	2	260.9	2.1	340	15	260.9	2.1	3.33457	Single Age
12WPY08_47	2312	235.8	0.3174	0.0043	0.0432	0.00061	0.4832	279.9	3.3	272.6	3.8	338	24	272.6	3.8	2.60807	Rim
12WPY08_47	8300	40.3	0.683	0.027	0.0942	0.0041	0.95273	528	16	580	24	317	31	580	24	9.84848	Core
12WPY08_48	1110	27.1	0.3325	0.004	0.04509	0.00045	0.19654	291.4	3.1	284.3	2.8	345	22	284.3	2.8	2.43651	Single Age
12WPY08_49	1910	109	0.418	0.022	0.04543	0.00038	0.36721	352	15	286.4	2.3	751	99	DISC	DISC	18.6364	Single Age
12WPY08_50	2207	144.5	0.3221	0.0039	0.04413	0.00055	0.47648	284.5	3	278.4	3.4	331	26	278.4	3.4	2.14411	Single Age
12WPY08_51	2210	8.7	0.3834	0.0095	0.04139	0.00072	0.1231	329	7	261.4	4.5	853	59	DISC	DISC	20.5471	Single Age
12WPY08_52	1571	118.2	0.3298	0.0037	0.0443	0.00048	0.73937	289.3	2.8	279.4	3	377	18	279.4	3	3.42205	Single Age
12WPY08_53	1898	27	0.433	0.012	0.04304	0.00044	0.056757	364.7	8.7	271.7	2.7	991	60	DISC	DISC	25.5004	Single Age
12WPY08_54	1860	101	0.3409	0.0047	0.0453	0.00045	0.6809	297.7	3.5	285.6	2.8	381	20	285.6	2.8	4.06449	Single Age
12WPY08_55	2154	11.54	0.4181	0.0069	0.0423	0.0004	0.22222	354.4	4.9	267	2.5	988	31	DISC	DISC	24.6614	Single Age
12WPY08_56	1670	134.2	0.3225	0.0034	0.04428	0.0005	0.75592	283.8	2.6	279.3	3.1	323	18	279.3	3.1	1.58562	Single Age
12WPY08_57	1667	27.4	0.3955	0.0093	0.04424	0.00048	0.4692	337.9	6.7	279	3	772	44	DISC	DISC	17.4312	Single Age
12WPY08_58	1630	49.1	0.362	0.012	0.04468	0.00049	0.50988	312.6	8.6	281.8	3	546	60	281.8	3	9.85285	Single Age
12WPY08_59	1233	166	0.3148	0.0028	0.04297	0.00032	0.49343	277.8	2.1	271.4	2	334	18	271.4	2	2.30382	Single Age
12WPY08_60	1662	25.3	0.3534	0.006	0.04179	0.00043	0.23488	307	4.5	263.9	2.7	672	38	DISC	DISC	14.0391	Single Age
12WPY08_61	3140	338.2	0.3115	0.0028	0.04278	0.00041	0.61982	275.3	2.2	270	2.6	324	16	270	2.6	1.92517	Single Age
12WPY08_62	2709	138.9	0.3393	0.0041	0.04467	0.00048	0.49561	296.6	3.1	281.7	2.9	418	22	281.7	2.9	5.0236	Single Age
12WPY08_63	1663	159.8	0.3288	0.0031	0.04443	0.00039	0.56885	288.6	2.4	280.2	2.4	355	19	280.2	2.4	2.9106	Single Age
12WPY08_64	1202	59.5	0.3328	0.0039	0.0444	0.00044	0.77586	292	3	280	2.7	380	16	280	2.7	4.10959	Single Age
12WPY08_65	1431	85.6	0.3165	0.0033	0.0435	0.00045	0.76813	279.5	2.6	274.5	2.8	331	15	274.5	2.8	1.78891	Single Age
12WPY08_66	1256	163.9	0.3447	0.0037	0.04707	0.00061	0.40055	300.7	2.8	296.5	3.7	335	21	296.5	3.7	1.39674	Single Age
12WPY08_67	1455	75	0.3429	0.0049	0.04531	0.00055	0.4713	299.3	3.7	285.7	3.4	412	33	285.7	3.4	4.54394	Single Age
12WPY08_68	719	94.2	0.362	0.0048	0.04936	0.00053	0.6244	314	3.5	310.6	3.3	328	24	310.6	3.3	1.0828	Single Age
12WPY08_69	1894	47.6	0.3775	0.0083	0.04487	0.0006	0.5813	324.8	6.1	282.9	3.7	642	35	DISC	DISC	12.9002	Single Age
12WPY08_70	1623	101	0.371	0.012	0.04363	0.00099	0.49915	320	8.5	275.2	6.1	663	59	DISC	DISC	14	Single Age
12WPY08_71	1814	118	0.3175	0.0034	0.04242	0.00046	0.81215	279.9	2.6	267.8	2.9	371	15	267.8	2.9	4.32297	Single Age
12WPY08_72	1978	48.8	0.3601	0.006	0.04362	0.00064	0.59958	312.7	4.3	275.2	4	593	31	DISC	DISC	11.9923	Single Age
12WPY08_73	2457	6.26	0.455	0.011	0.04396	0.00055	0.28662	381.2	7.9	277.3	3.4	1088	47	DISC	DISC	27.256	Single Age
12WPY08_74	1699	18.1	0.384	0.0055	0.04449	0.00042	0.45665	329.8	4	280.6	2.6	694	26	DISC	DISC	14.9181	Single Age
12WPY08_75	1800	230	0.3274	0.0036	0.04498	0.00066	0.60916	287.9	2.7	283.6	4.1	333	24	283.6	4.1	1.49357	Single Age
12WPY08_76	1750	158	0.3285	0.0054	0.0434	0.00059	0.56553	288.3	4.1	273.9	3.7	387	22	273.9	3.7	4.9948	Single Age
12WPY08_77	2410	146	0.3486	0.0038	0.04465	0.00038	0.35084	303.6	2.9	281.6	2.4	486	26	281.6	2.4	7.24638	Single Age
12WPY08_78	1076	142.7	0.3413	0.0046	0.04685	0.00064	0.76669	298	3.5	295.1	3.9	338	20	295.1	3.9	0.973154	Single Age
12WPY08_79	1861	175	0.3299	0.0033	0.04428	0.00043	0.47785	289.4	2.6	279.3	2.6	363	23	279.3	2.6	3.48998	Single Age
12WPY08_80	1642	161.6	0.3274	0.0037	0.04439	0.0006	0.59847	287.6	2.8	280	3.7	358	24	280	3.7	2.64256	Single Age
12WPY08_81	2950	101	0.3067	0.003	0.04182	0.00032	0.29931	271.2	2.2	264.1	2	322	15	264.1	2	2.61799	Single Age
12WPY08_82	1568	157	0.3433	0.0037	0.04581	0.00034	0.56254	299.6	2.8	288.8	2.1	386	17	288.8	2.1	3.60481	Single Age
12WPY08_84	1315	99.1	0.3199	0.0031	0.04402	0.00043	0.76517	282.1	2.5	277.7	2.7	333	17	277.7	2.7	1.55973	Single Age
12WPY08_87	2202	198	0.3224	0.0034	0.04393	0.00048	0.52753	283.7	2.6	277.1	3	350	25	277.1	3	2.3264	Single Age
12WPY08_88	1290	102	0.3309	0.0066	0.0441	0.00062	0.78963	290.1	5	278.2	3.8	356	23	278.2	3.8	4.10203	Single Age
12WPY08_89	1537	71.8	0.3786	0.0093	0.0446	0.00057	0.48636	325.5	6.8	281.8	3.4	674	48	DISC	DISC	13.4255	Single Age
12WPY08_90	1431	132	0.3374	0.0044	0.04467	0.00061	0.71989	295.1	3.4	281.7	3.8	391	20	281.7	3.8	4.54083	Single Age
12WPY08_91	1670	41.4	0.365	0.014	0.04343	0.00055	0.6648	312.7	9.1	274.1	3.4	596	55	DISC	DISC	12.3441	Single Age
12WPY08_92	1650	118.2	0.3122	0.0023	0.04294	0.00035	0.58323	275.8	1.8	271	2.2	314	16	271	2.2	1.74039	Single Age
12WPY08_93	2170	41.3	0.3946	0.0096	0.04292	0.00054	0.30153	338	6.9	270.9	3.3	803	62	DISC	DISC	19.8521	Single Age
12WPY08_94	2062	39.4	0.3635	0.0058	0.04408	0.00042	0.5771	314.6	4.4	278.1	2.6	592	27	DISC	DISC	11.602	Single Age
12WPY08_95	1523	116	0.3376	0.0035	0.04465	0.00044	0.4387	295.7	2.6	281.6	2.7	404	24	281.6	2.7	4.76835	Single Age
12WPY08_96	2020	10.95	0.4031	0.0051	0.04361	0.00031	0.30399	344.2	3.6	275.2	1.9	844	24	DISC	DISC	20.0465	Single Age
12WPY08_97	920	101.6	0.3159	0.005	0.04304	0.00062	0.67692	278.6	3.8	271.6	3.8	333	26	271.6	3.8	2.51256	Single Age
12WPY08_98	1564	118.2	0.3223	0.0028	0.04367	0.00038	0.60226	283.6	2.1	275.6	2.3	349	17	275.6	2.3	2.82087	Single Age
12WPY08_99	1094	25.7	0.4236	0.0084	0.04805	0.00054	0.22389	358.3	6	302.5	3.3	756	44	DISC	DISC	15.5735	Single Age
12WPY08_100	1979	31.5	0.375	0.0056	0.04383	0.00048	0.51765	323.2	4.1	276.5	2.9	684	28	DISC	DISC	14.4493	Single Age
12WPY08_101	143.2	3.17	1.761	0.015	0.1721	0.0018	0.46222	1030.8	5.7	1023.3	9.7	1041	20	1023.3	9.7	0.72759	Single Age
12WPY08_103	1375	49.7	0.3236	0.0031	0.04138	0.00033	0.41679	284.6	2.4	261.4	2.1	496	25	261.4	2.1	8.15179	Single Age
12WPY08_104	1880	107	0.3045	0.0037	0.04057	0.00072	0.47934	269.9	2.8	256.3	4.5	381	33	256.3	4.5	5.0389	Single Age
12WPY08_105	1494	89.1	0.3018	0.0032	0.04161	0.00037	0.7741	267.8	2.5	262.8	2.3	309	15	262.8	2.3	1.86706	Single Age
12WPY08_106	1076	54.3	0.3392	0.0033	0.04361	0.00062	0.016672	296.5	2.5	275.1	3.8	467	40	275.1	3.8	7.21754	Single Age
12WPY08_107	1277	41.7	0.343	0.0039	0.04379	0.00038	0.25228	299.4	3	276.3	2.3	486	27	276.3	2.3	7.71543	Single Age
12WPY08_108	1041	83.7	0.3224	0.0038	0.04394	0.00053	0.68939	284	2.9	277.2	3.3	339	21	277.2	3.3	2.39437	Single Age
12WPY08_109	1646	8	0.3502	0.0035	0.04363	0.0004	0.48188	304.8	2.6	275.3	2.5	544	20	275.3	2.5	9.67848	Single Age
12WPY08_110	1700	29.3	0.3669	0.0065	0.0437	0.00053	0.52849	317.6	4.8	275.7	3.3	626	33	DISC	DISC	13.1927	Single Age
12WPY08_111	2019	245	0.3056	0.0043	0.04126	0.00088	0.66657	270.7	3.3	260.6	5.4	360	35	260.6	5.4	3.73107	Single Age
12WPY08_112	1310	15.5	0.3595	0.0099	0.04441	0.00081	0.68966	311.6	7.4	280.1	5	567	42	DISC	DISC	10.1091	Single Age
12WPY08_113	1839	312	0.3093	0.0025	0.04242	0.00033	0.56213	273.6	1.9	267.8	2	332	16	267.8	2	2.11988	Single Age
12WPY08_114	2050	306	0.314	0.0048	0.04328	0.00071	0.77211	277.2	3.7	273.1	4.4	319	18	273.1	4.4	1.47908	Single Age
12WPY08_115	2016	208	0.3405	0.0035	0.04409	0.00039	0.69381	297.5	2.7	278.2	2.4	473	18	278.2	2.4	6.48739	Single Age
12WPY08_116	1292	112.9	0.324	0.0056	0.04445	0.0008	0.85569	284.8	4.3	280.3	4.9	323	23	280.3	4.9	1.58006	Single Age
12WPY08_117	851	43.2	0.357	0.0081	0.04815	0.00092	0.92889	310.4	5.9	303.1	5.7	388	18	303.1	5.7	2.3518	Single Age
12WPY08_118	1582	326	0.3082	0.0037	0.04228	0.00049	0.68525	273.2	2.8	266.9	3	331	23	266.9	3	2.306	Single Age
12WPY08_119	874	88	0.3284	0.0037	0.04533	0.00056	0.72892	288.3	2.8	285.8	3.4	328	20	285.8	3.4	0.867152	Single Age
12WPY08_120	1536	3.56	0.3512	0.0039	0.04303	0.00039	0.33429	305.9	2.9	271.6	2.4	585	24	DISC	DISC	11.2128	Single Age
12WPY08_121	2160	132.4	0.401	0.0088	0.04367	0.00049	0.58208	342	6.4	275.5	3	833	36	DISC	DISC	19.4444	Single Age
12WPY08_122	1290	41.4	0.3318	0.005	0.04441	0.00069	0.61048	290.9	3.8	280.1	4.3	378	30	280.1	4.3	3.71262	Single Age
12WPY08_123	966	112	0.3445	0.0037	0.0463	0.00048	0.38453	300.5	2.8	291.8	3	368	27	291.8	3	2.89517	Single Age
12WPY08_124	1230	52.7	0.3365	0.0054	0.04346	0.00066	0.62102	294.4	4.1	274.3	4.1	464	25	274.3	4.1	6.82745	Single Age
12WPY10_1	560	23.68	0.3411	0.0073	0.0472	0.0013	0.74046	297.9	5.5	297.3	7.7	300	13	297.3	7.7	0.20141	Rim
12WPY10_1	365	2.31	0.715	0.01	0.0875	0.0011	0.70382	547.3	6.1	540.5	6.5	572	14	540.5	6.5	1.24246	Core
12WPY10_2	457	0.929	0.716	0.0099	0.0867	0.0011	0.76035	548	5.9	535.7	6.4	588	12	535.7	6.4	2.24453	Single Age
12WPY10_3	486.5	21.62	0.3273	0.0049	0.04477	0.00071	0.61779	287.4	3.7	282.3	4.4	314	15	282.3	4.4	1.77453	Single Age
12WPY10_4	256	27.2	0.406	0.023	0.0549	0.003	0.46179	346	17	345	18	350	38	345	18	0.289017	Rim
12WPY10_4	402	2.333	0.7514	0.0067	0.08999	0.00064	0.65312	568.9	3.9	555.5	3.8	595.5	8.2	555.5	3.8	2.35542	Core
12WPY10_5	335.7	24.09	0.3398	0.0043	0.04775	0.00036	0.41975	296.9	3.3	301	2.3	266	15	301	2.3	1.38094	Single Age
12WPY10_6	473	18.3	0.3325	0.0077	0.04581	0.00084	0.73207	291.3	5.8	288.7	5.2	315	24	288.7	5.2	0.892551	Rim
12WPY10_6	235	1.242	0.529	0.026	0.0676	0.0019	0.70521	430	17	422	11	480	58	422	11	1.86047	Core
12WPY10_7	509	22.1	0.3321	0.0062	0.04639	0.00095	0.55551	291.1	4.7	292.3	5.9	304	19	292.3	5.9	0.412229	Rim
12WPY10_7	153.2	0.4217	0.893	0.013	0.1079	0.0016	0.20913	648	7.2	660.4	9.3	636	19	660.4	9.3	1.91358	Core
12WPY10_8	372.4	18.22	0.3283	0.0042	0.04548	0.00047	0.56818	288.2	3.2	286.7	2.9	312	15	286.7	2.9	0.520472	Single Age
12WPY10_9	402	23.9	0.359	0.011	0.04891	0.0008	0.54456	311.7	7.9	307.8	4.9	395	40	307.8	4.9	1.2512	Rim
12WPY10_9	86	3.21	0.861	0.016	0.1046	0.0023	0.079728	630.6	8.9	641	13	609	33	641	13	1.64922	Core
12WPY10_10	331.8	23.42	0.3277	0.0057	0.04467	0.00055	0.25652	287.7	4.3	281.7	3.4	348	22	281.7	3.4	2.08551	Single Age
12WPY10_11	260.6	7.6	0.3869	0.0091	0.053	0.0011	0.54385	331.9	6.6	332.6	6.6	358	25	332.6	6.6	0.210907	Single Age
12WPY10_12	371.6	22.05	0.3394	0.0041	0.04753	0.00046	0.38671	296.7	3.1	299.3	2.8	278	17	299.3	2.8	0.876306	Single Age
12WPY10_13	335	15.1	0.402	0.025	0.0544	0.0029	0.91143	343	18	341	18	357	31	341	18	0.58309	Rim
12WPY10_13	400	0.662	0.731	0.011	0.0903	0.0013	0.72522	557	6.4	557.2	7.8	572	12	557.2	7.8	0.0359066	Core
12WPY10_14	402	20.95	0.3362	0.0057	0.04614	0.00061	0.49164	294.2	4.3	290.8	3.7	329	24	290.8	3.7	1.15568	Single Age
12WPY10_15	466.8	21.43	0.3341	0.0043	0.04581	0.00045	0.21467	292.6	3.3	288.7	2.8	301	22	288.7	2.8	1.33288	Single Age
12WPY10_16	536	23.6	0.344	0.0064	0.04745	0.00098	0.57817	300.1	4.8	298.8	6	340	17	298.8	6	0.433189	Rim
12WPY10_16	184	0.99	0.711	0.025	0.0865	0.0034	0.79476	545	15	535	20	558	27	535	20	1.83486	Core
12WPY10_17	318.9	24.66	0.3443	0.0061	0.0475	0.00063	0.54933	300.3	4.6	299.1	3.9	315	22	299.1	3.9	0.3996	Single Age
12WPY10_18	400	23.3	0.3232	0.0044	0.04498	0.00045	0.46115	284.3	3.4	283.6	2.8	279	16	283.6	2.8	0.246219	Single Age
12WPY10_19	333	24.24	0.3296	0.0038	0.04586	0.00044	0.31468	289.2	2.9	289	2.7	277	19	289	2.7	0.0691563	Single Age
12WPY10_20	499	20.25	0.3365	0.0042	0.04676	0.0005	0.5038	294.4	3.2	294.6	3.1	304	16	294.6	3.1	0.0679348	Rim
12WPY10_20	154.7	6.14	0.624	0.029	0.0802	0.0036	0.61183	492	18	497	21	474	68	497	21	1.01626	Core
12WPY10_21	425.9	24.14	0.3367	0.0044	0.04679	0.00061	0.54153	294.6	3.4	294.8	3.8	296	18	294.8	3.8	0.0678887	Rim
12WPY10_21	201	9.1	0.62	0.018	0.0765	0.001	0.47583	490	11	475.5	6.1	546	18	475.5	6.1	2.95918	Core
12WPY10_22	293.5	20.97	0.3307	0.0044	0.04564	0.00038	0.40917	290	3.3	287.7	2.4	309	16	287.7	2.4	0.793103	Single Age
12WPY10_23	377.9	23.31	0.3452	0.0038	0.04768	0.00031	0.4373	301	2.9	300.3	1.9	301	12	300.3	1.9	0.232558	Single Age
12WPY10_24	360	20.8	0.3456	0.0069	0.04787	0.00099	0.81004	301.2	5.2	301.4	6.1	323	16	301.4	6.1	0.0664011	Rim
12WPY10_24	169.3	0.746	4.132	0.082	0.2432	0.0053	0.68999	1660	16	1403	27	2002	17	2002	17	29.9201	Core
12WPY10_25	575.8	20.28	0.3347	0.0056	0.04622	0.00054	0.41468	293.1	4.2	291.3	3.3	337	24	291.3	3.3	0.614125	Rim
12WPY10_25	575	3.73	0.693	0.026	0.0832	0.0027	0.78592	534	16	515	16	614	26	515	16	3.55805	Core
12WPY10_26	556	52	0.3433	0.0071	0.04778	0.00081	0.83024	299.5	5.3	300.8	5	297	15	300.8	5	0.434057	Rim
12WPY10_26	38.6	1.26	1.381	0.085	0.1421	0.0061	0.77716	879	36	869	27	944	37	869	27	1.13766	Core
12WPY10_27	175.5	120.4	0.3496	0.0069	0.04852	0.00076	0.17895	304.2	5.2	305.4	4.7	310	28	305.4	4.7	0.394477	Single Age
12WPY10_28	445	21.81	0.3418	0.0051	0.04769	0.00065	0.7216	299.1	3.7	300.3	4	308	15	300.3	4	0.401204	Single Age
12WPY10_29	291	27.7	0.3308	0.0091	0.04569	0.00093	0.54826	289.9	7	288	5.8	304	30	288	5.8	0.655398	Rim
12WPY10_29	649	7.46	1.328	0.033	0.1349	0.003	0.7566	858	14	816	17	934	36	816	17	4.8951	Core
12WPY10_30	345	20.63	0.3389	0.0037	0.04708	0.00044	0.39444	296.6	2.9	296.6	2.7	291	15	296.6	2.7	0	Single Age
12WPY10_31	339	21.23	0.3362	0.0039	0.04704	0.00042	0.33245	294.2	3	296.3	2.6	275	15	296.3	2.6	0.7138	Single Age
12WPY10_32	360	23.88	0.3239	0.0054	0.04466	0.00045	0.42107	284.8	4.1	281.6	2.8	309	28	281.6	2.8	1.1236	Single Age
12WPY10_34	310.5	21.94	0.3403	0.0046	0.04628	0.00048	0.4245	297.3	3.5	291.6	3	323	18	291.6	3	1.91726	Single Age
12WPY10_35	490	23.2	0.334	0.0061	0.0457	0.0012	0.25018	292.6	4.7	287.9	7.2	336	58	287.9	7.2	1.60629	Rim
12WPY10_35	155	1.351	1.477	0.026	0.1495	0.0023	0.645	921	11	898	13	983	15	898	13	2.49729	Core
12WPY10_36	299.3	24.04	0.3405	0.0056	0.04712	0.00074	0.58841	297.4	4.2	296.8	4.5	290	21	296.8	4.5	0.201748	Single Age
12WPY10_37	403.3	21.56	0.3333	0.0054	0.04587	0.00038	0.22476	292	4.1	289.1	2.3	318	24	289.1	2.3	0.993151	Rim
12WPY10_37	418	5.72	0.447	0.012	0.0583	0.0014	0.66865	375	8.8	365	8.6	444	34	365	8.6	2.66667	Core
12WPY10_39	314	19.8	0.349	0.0087	0.04833	0.00085	0.041001	305.5	5.9	304.3	5.2	330	46	304.3	5.2	0.392799	Rim
12WPY10_39	99.2	2.02	0.661	0.023	0.078	0.0016	0.57963	518	15	484.3	9.8	653	39	484.3	9.8	6.50579	Core
12WPY10_40	740	21	0.3482	0.008	0.047	0.0011	0.47529	303.2	6	295.8	6.7	341	20	295.8	6.7	2.44063	Rim
12WPY10_40	264.3	1.435	0.755	0.011	0.091	0.0013	0.5349	570.9	6.6	561.5	7.5	599	15	561.5	7.5	1.64652	Core
12WPY10_41	387	18.07	0.3388	0.0041	0.04674	0.00041	0.35349	296.1	3.1	294.4	2.5	303	18	294.4	2.5	0.57413	Single Age
12WPY10_42	373	23.4	0.3427	0.0077	0.04741	0.00088	0.54154	299.1	5.8	298.6	5.4	303	30	298.6	5.4	0.167168	Rim
12WPY10_42	494	1.74	1.161	0.025	0.1187	0.0027	0.87349	782	12	723	16	932	16	723	16	7.54476	Core
12WPY10_43	307	77.9	0.3592	0.0059	0.04772	0.00074	0.53702	312.7	4.7	300.5	4.5	414	19	300.5	4.5	3.9015	Rim
12WPY10_43	251.5	1.158	0.841	0.011	0.0998	0.0011	0.5323	619.6	5.8	614.4	6.4	636	16	614.4	6.4	0.839251	Core
12WPY10_44	385	22.06	0.3468	0.0075	0.04744	0.00088	0.45142	302.2	5.7	298.8	5.4	311	35	298.8	5.4	1.12508	Rim
12WPY10_44	1042	5.95	0.6088	0.0068	0.0737	0.0011	0.83485	482.8	4.3	458.2	6.5	611	8.4	458.2	6.5	5.09528	Core
12WPY10_45	280.9	24.73	0.3441	0.0055	0.04733	0.00062	0.35581	300.2	4.2	298.1	3.8	305	22	298.1	3.8	0.699534	Single Age
12WPY10_46	382.5	24.12	0.3296	0.0053	0.0455	0.00062	0.40414	289.1	4.1	286.8	3.8	302	19	286.8	3.8	0.795572	Single Age
12WPY10_47	303	21.23	0.3224	0.005	0.04479	0.0005	0.14482	283.6	3.8	282.5	3.1	312	20	282.5	3.1	0.38787	Single Age
12WPY10_48	444	20.6	0.3358	0.0048	0.0455	0.00047	0.34253	294.7	3.9	286.8	2.9	336	20	286.8	2.9	2.68069	Single Age
12WPY10_49	457	19.6	0.3387	0.0077	0.04674	0.00067	0.1121	296.1	5.8	294.4	4.1	324	30	294.4	4.1	0.57413	Single Age
12WPY10_50	453	27.7	0.3932	0.0091	0.0527	0.0011	0.717	336.4	6.6	331	6.6	370	20	331	6.6	1.60523	Single Age
12WPY10_51	328	1.329	0.8394	0.0095	0.0983	0.0012	0.44951	618.6	5.3	604.3	7.3	670	17	604.3	7.3	2.31167	Single Age
12WPY10_52	316.5	25.61	0.352	0.013	0.048	0.0011	0.12759	308	11	302.1	6.8	376	45	302.1	6.8	1.91558	Rim
12WPY10_52	103	1.613	1.556	0.056	0.1612	0.0028	0.78203	952	23	963	16	929	32	963	16	1.15546	Core
12WPY10_53	325	24.44	0.324	0.0074	0.04577	0.00074	0.4999	284.8	5.6	288.5	4.5	272	25	288.5	4.5	1.29916	Rim
12WPY10_53	202	18.4	0.413	0.01	0.055	0.0011	0.36195	350.9	7.2	345.3	6.7	393	32	345.3	6.7	1.5959	Core
12WPY10_54	312.6	19.78	0.3464	0.0052	0.04844	0.00053	0.18162	301.9	3.9	304.9	3.2	310	27	304.9	3.2	0.993707	Single Age
12WPY10_55	292.4	22.73	0.3431	0.0059	0.04702	0.00065	0.52732	299.4	4.5	296.2	4	327	20	296.2	4	1.0688	Single Age
12WPY10_56	406	21.29	0.3504	0.0061	0.04734	0.00082	0.32472	305	4.6	298.2	5.1	338	29	298.2	5.1	2.22951	Rim
12WPY10_56	753	2.422	0.5488	0.0091	0.0685	0.0011	0.74499	444.1	5.9	427.4	6.5	533	12	427.4	6.5	3.76041	Core
12WPY10_57	325.6	21.63	0.3375	0.004	0.04691	0.00061	0.25043	295.2	3	295.5	3.8	281	20	295.5	3.8	0.101626	Single Age
12WPY10_58	378.6	20.75	0.3291	0.0057	0.04571	0.00067	0.41171	288.7	4.3	288.1	4.1	299	22	288.1	4.1	0.207828	Single Age
12WPY10_59	479	2.104	0.651	0.011	0.0796	0.0013	0.82492	509.8	6.7	494.8	7.9	565	13	494.8	7.9	2.94233	Single Age
12WPY10_60	188	13	0.389	0.014	0.0532	0.0015	0.58391	333	10	334.1	9.2	317	35	334.1	9.2	0.33033	Rim
12WPY10_60	106.7	0.784	0.716	0.025	0.0862	0.0025	0.53768	548	14	533	15	590	32	533	15	2.73723	Core
12WPY10_61	285	1.022	4.145	0.064	0.2588	0.0038	0.84353	1662	13	1486	20	1889.7	8.6	1889.7	8.6	21.3632	Single Age
12WPY10_62	134.8	0.64	1.077	0.018	0.1207	0.0019	0.59058	741.2	9	735	11	748	21	735	11	0.836481	Single Age
12WPY10_63	728	2.306	0.6443	0.0094	0.0784	0.001	0.82488	504.8	5.8	486.4	6.1	583	11	486.4	6.1	3.64501	Single Age
12WPY10_64	345	22.07	0.3635	0.0081	0.0504	0.0011	0.086874	314.8	6	317	6.7	323	47	317	6.7	0.698856	Rim
12WPY10_64	207.2	2.212	0.653	0.011	0.0816	0.0014	0.30736	510.2	7	505.3	8.3	548	16	505.3	8.3	0.960408	Core
12WPY10_65	248	37.3	0.352	0.0092	0.04826	0.00075	0.39851	306.1	6.9	303.8	4.6	349	37	303.8	4.6	0.751388	Rim
12WPY10_65	65.5	1.137	0.923	0.022	0.1103	0.0016	0.3716	665	12	674.4	9.3	630	28	674.4	9.3	1.41353	Core
12WPY10_66	495	22.87	0.337	0.02	0.0465	0.0011	0.6313	295	15	293.1	6.6	302	57	293.1	6.6	0.644068	Rim
12WPY10_66	137	3.63	1.025	0.027	0.1147	0.0024	0.72097	716	14	700	14	742	33	700	14	2.23464	Core
12WPY10_67	375	27.09	0.3385	0.0084	0.04695	0.0009	0.24483	296	6.3	295.7	5.6	365	45	295.7	5.6	0.101351	Single Age
12WPY10_68	296	34.6	0.3513	0.0065	0.0486	0.00082	0.56367	305.6	4.9	305.9	5.1	319	24	305.9	5.1	0.0981675	Rim
12WPY10_68	126	1.382	0.945	0.026	0.1127	0.0023	0.13243	675	14	688	13	620	43	688	13	1.92593	Core
12WPY10_69	373	20.9	0.3375	0.006	0.04616	0.00063	0.31566	295.2	4.6	290.9	3.9	331	24	290.9	3.9	1.45664	Single Age
12WPY10_70	90	5.15	1.681	0.037	0.1711	0.0028	0.86054	1004	14	1018	15	973	17	1018	15	1.39442	Single Age
12WPY10_73	358	21.73	0.347	0.004	0.04821	0.00041	0.52064	302.8	2.9	303.5	2.5	309	14	303.5	2.5	0.231176	Single Age
12WPY10_74	281	151	0.427	0.04	0.0529	0.0052	0.47057	360	28	332	32	579	72	332	32	7.77778	Rim
12WPY10_74	112.6	0.727	1.394	0.018	0.1496	0.0019	0.53168	886	7.6	899	11	859	12	899	11	1.46727	Core
12WPY10_75	293	27.79	0.3259	0.006	0.04399	0.00066	0.52264	286.3	4.6	277.5	4.1	356	21	277.5	4.1	3.0737	Single Age
12WPY10_76	403	23	0.35	0.015	0.0468	0.0013	0.29454	305	11	295.1	8.2	362	77	295.1	8.2	3.2459	Rim
12WPY10_76	750	0.702	0.825	0.012	0.0954	0.0014	0.71858	610.4	6.5	587.4	8.2	702	13	587.4	8.2	3.76802	Core
12WPY10_77	318	19.88	0.3164	0.0042	0.04398	0.00041	0.25573	279.5	3.2	277.4	2.5	293	17	277.4	2.5	0.751342	Single Age
12WPY10_78	456.9	21.34	0.3179	0.0036	0.04389	0.00037	0.52722	280.2	2.8	276.9	2.3	301	14	276.9	2.3	1.17773	Single Age
12WPY10_79	322.8	22.1	0.3357	0.006	0.04635	0.00051	0.36657	293.8	4.5	292.1	3.1	306	25	292.1	3.1	0.578625	Single Age
12WPY10_80	378	21.24	0.3147	0.0034	0.0442	0.00037	0.15298	277.8	2.6	279.5	2.3	274	16	279.5	2.3	0.611951	Single Age
12WPY10_81	225.7	1.052	0.854	0.011	0.1026	0.0011	0.57882	626.6	6.2	629.8	6.3	625	16	629.8	6.3	0.510693	Single Age
12WPY10_82	663	4.24	0.6018	0.0073	0.07455	0.00096	0.73777	478.2	4.6	463.5	5.8	551	15	463.5	5.8	3.07403	Single Age
12WPY10_83	405	19.9	0.3523	0.0072	0.04909	0.0009	0.37681	306.3	5.4	308.9	5.5	330	29	308.9	5.5	0.848841	Rim
12WPY10_83	170.2	9.69	0.506	0.016	0.0655	0.0017	0.61026	416	10	409	10	448	53	409	10	1.68269	Core
12WPY10_84	223	37.9	0.3454	0.0051	0.04655	0.0007	0.3765	301.1	3.8	294.5	4.3	352	19	294.5	4.3	2.19196	Single Age
12WPY10_85	740	48	0.335	0.016	0.0454	0.0019	0.8115	293	12	286	12	350	25	286	12	2.38908	Rim
12WPY10_85	303.1	1.2	0.771	0.013	0.089	0.0013	0.65298	580.1	7.6	549.8	7.8	716	19	549.8	7.8	5.22324	Core
12WPY10_86	197	4.52	1.012	0.024	0.112	0.0027	0.71094	709	12	684	16	790	22	684	16	3.52609	Single Age
12WPY10_87	345.7	21.1	0.3403	0.0067	0.0476	0.0014	0.3467	297.3	5.1	299.9	8.3	309	36	299.9	8.3	0.874538	Rim
12WPY10_87	168	0.937	0.758	0.015	0.0905	0.0019	0.67965	572.3	8.8	558	11	608	22	558	11	2.49869	Core
12WPY10_88	488	19.6	0.3335	0.0058	0.04573	0.00078	0.55845	292.1	4.4	288.3	4.8	325	15	288.3	4.8	1.30092	Single Age
12WPY10_89	363	20.98	0.339	0.0055	0.04766	0.00065	0.22502	296.3	4.2	300.1	4	280	27	300.1	4	1.28248	Rim
12WPY10_89	433	31.2	0.4861	0.0076	0.06296	0.0009	0.77832	402.2	5.2	393.6	5.5	456	18	393.6	5.5	2.13824	Core
12WPY10_90	314	23.89	0.3483	0.0088	0.04805	0.00084	0.47565	303.2	6.6	303.4	5.4	311	33	303.4	5.4	0.0659631	Single Age
12WPY10_91	321	20.89	0.3542	0.0053	0.04893	0.0007	0.06899	307.8	4	308.7	4.1	316	26	308.7	4.1	0.292398	Rim
12WPY10_91	425	7.79	0.5247	0.0096	0.0675	0.0012	0.54153	428.2	6.4	421.1	7.1	456	29	421.1	7.1	1.6581	Core
12WPY10_92	308	22.21	0.3397	0.0047	0.04684	0.00051	0.031323	296.9	3.6	295.1	3.1	301	27	295.1	3.1	0.606265	Single Age
12WPY10_93	352.5	20.31	0.3348	0.0058	0.04678	0.00054	0.39782	293.2	4.4	294.7	3.3	291	26	294.7	3.3	0.511596	Single Age
12WPY10_94	384	21.75	0.3322	0.0067	0.04586	0.00056	0.034679	291.1	5.1	289.1	3.4	300	22	289.1	3.4	0.687049	Rim
12WPY10_94	617	5.68	0.729	0.024	0.0867	0.0026	0.83673	556	14	536	16	624	36	536	16	3.59712	Core
12WPY10_95	334	12.66	0.3811	0.0078	0.05123	0.00059	0.73649	328.6	5.6	322.1	3.6	379	19	322.1	3.6	1.97809	Single Age
12WPY10_96	427	22.53	0.3342	0.0046	0.047	0.00059	0.42434	292.7	3.5	296.1	3.7	270	21	296.1	3.7	1.1616	Rim
12WPY10_96	393	0.88	0.5856	0.0079	0.0741	0.0011	0.58421	468	5	460.7	6.4	524	19	460.7	6.4	1.55983	Core
12WPY10_97	389	23.89	0.3227	0.0047	0.04503	0.0005	0.13387	283.9	3.6	283.9	3.1	287	22	283.9	3.1	0	Single Age
12WPY10_98	337.9	20.95	0.3318	0.0037	0.04352	0.00045	0.1227	290.9	2.9	274.6	2.8	416	14	274.6	2.8	5.6033	Single Age
12WPY10_99	528	21.69	0.3444	0.0078	0.04649	0.00084	0.19493	300.4	5.9	292.9	5.2	354	43	292.9	5.2	2.49667	Rim
12WPY10_99	211	2.053	4.92	0.29	0.286	0.015	0.98318	1808	48	1617	78	2018	13	2018	13	19.8712	Core
12WPY10_100	431	25.05	0.339	0.0044	0.04727	0.00057	0.21971	296.3	3.3	297.8	3.5	286	25	297.8	3.5	0.506244	Single Age
12WPY10_101	427.8	23.88	0.3365	0.004	0.04664	0.00046	0.38999	294.4	3.1	293.9	2.8	295	14	293.9	2.8	0.169837	Single Age
12WPY10_102	338	45	0.3568	0.0099	0.0485	0.0014	0.54425	309.7	7.4	305.5	8.5	300	34	305.5	8.5	1.35615	Rim
12WPY10_102	646	1.596	0.5742	0.0085	0.0712	0.001	0.64728	460.6	5.5	443.6	6.2	538	14	443.6	6.2	3.69084	Core
12WPY10_103	429	24.6	0.3405	0.0075	0.04744	0.00078	0.46659	297.5	5.7	298.7	4.8	286	29	298.7	4.8	0.403361	Rim
12WPY10_103	101.2	1.266	5.283	0.064	0.2686	0.004	0.66074	1869	11	1533	20	2266	14	DISC	DISC	32.3477	Core
12WPY10_104	308	19.37	0.3408	0.0043	0.04727	0.0004	0.23483	297.7	3.2	297.7	2.5	298	19	297.7	2.5	0	Single Age
12WPY10_105	494.1	15.56	0.57	0.011	0.06768	0.00086	0.71845	458.2	6.8	422.1	5.2	649	17	422.1	5.2	7.87866	Single Age
12WPY10_106	443	22.89	0.3349	0.0088	0.0455	0.0015	0.52432	293.3	6.7	286.9	9.5	367	29	286.9	9.5	2.18207	Rim
12WPY10_106	120	0.895	0.899	0.016	0.1065	0.0017	0.74715	651.8	9	652	10	654	17	652	10	0.0306843	Core
12WPY10_107	165.8	0.8	0.889	0.017	0.1045	0.0011	0.66662	645.3	9.2	640.8	6.5	662	17	640.8	6.5	0.69735	Single Age
12WPY10_108	619	20.1	2.499	0.03	0.1633	0.002	0.83045	1271.3	8.7	975	11	1829.8	8.3	DISC	DISC	23.3069	Single Age
12WPY10_109	373	23.27	0.3313	0.0057	0.04651	0.00081	0.1571	290.5	4.3	293.1	5	258	32	293.1	5	0.895009	Single Age
12WPY10_110	382	20.19	0.3222	0.006	0.04512	0.00049	0.28997	283.5	4.6	284.5	3	276	25	284.5	3	0.352734	Rim
12WPY10_110	402.9	3.232	0.678	0.022	0.0832	0.002	0.61604	526	13	515	12	586	24	515	12	2.09125	Core
12WPY10_111	425	20.53	0.3214	0.0035	0.04507	0.00038	0.179	283.3	2.6	284.2	2.4	292	16	284.2	2.4	0.317684	Single Age
12WPY10_113	335	20.9	0.343	0.012	0.0474	0.0013	0.34797	299.6	9	298.7	8.3	312	44	298.7	8.3	0.300401	Rim
12WPY10_113	155.5	3.138	0.622	0.015	0.077	0.0015	0.73973	490.5	9.6	478.3	8.9	582	25	478.3	8.9	2.48726	Core
12WPY10_114	465	25.05	0.341	0.012	0.0465	0.0014	0.34793	297.9	9.4	293.2	8.7	352	31	293.2	8.7	1.57771	Rim
12WPY10_114	331	7.3	0.452	0.0053	0.05773	0.00079	0.3383	378.6	3.7	361.8	4.8	502	18	361.8	4.8	4.4374	Core
12WPY10_115	339.3	11.94	0.503	0.031	0.0583	0.0026	0.77972	414	21	365	16	712	68	DISC	DISC	11.8357	Rim
12WPY10_115	19.32	1.436	5.94	0.13	0.354	0.0068	0.38535	1966	19	1953	33	1975	27	1975	27	1.11392	Core
12WPY10_116	542	11.4	0.3562	0.0071	0.0486	0.0015	0.64076	309.3	5.3	306.2	9.1	348	30	306.2	9.1	1.00226	Single Age
12WPY10_117	661	3.16	0.581	0.01	0.07157	0.00072	0.53218	464.8	6.6	445.6	4.3	569	20	445.6	4.3	4.13081	Rim
12WPY10_117	229	1.254	0.903	0.026	0.1112	0.0016	0.569	653	14	679.6	9.5	578	25	679.6	9.5	4.07351	Core
12WPY10_118	378.9	21.8	0.352	0.03	0.0486	0.0019	0.27815	306	22	306	12	340	140	306	12	0	Rim
12WPY10_118	221	3.96	0.524	0.0086	0.0662	0.0012	0.35346	427.7	5.7	413.3	7.4	513	27	413.3	7.4	3.36685	Rim
12WPY10_118	76.76	0.3543	1.056	0.028	0.1181	0.002	0.16378	731	14	720	12	769	41	720	12	1.50479	Core
12WPY10_119	103	0.96	15.89	0.27	0.5618	0.0097	0.91002	2869	16	2873	40	2863.5	7.1	2863.5	7.1	0.331762	Single Age
12WPY10_120	243	33.5	0.36	0.015	0.05	0.0014	0.33259	312	11	314.8	8.5	430	100	314.8	8.5	0.897436	Rim
12WPY10_120	316.4	2.524	0.74	0.017	0.0901	0.0018	0.72465	562	10	556	10	587	19	556	10	1.06762	Core
12WPY10_121	345.6	20.79	0.3289	0.009	0.04618	0.00065	0.30528	289.8	6.6	291	4	293	36	291	4	0.414079	Rim
12WPY10_121	464	0.953	0.621	0.018	0.0752	0.0017	0.78335	490	11	467	10	585	21	467	10	4.69388	Core
12WPY10_122	501	17.35	0.3289	0.0044	0.04549	0.00055	0.66183	288.7	3.4	286.8	3.4	324	15	286.8	3.4	0.658123	Rim
12WPY10_122	472	1.49	0.651	0.013	0.07974	0.00091	0.14859	508.9	8	494.6	5.4	579	32	494.6	5.4	2.80998	Core
12WPY10_123	342	22.91	0.336	0.01	0.04733	0.00064	0.096384	295.5	7.3	298.1	3.9	273	31	298.1	3.9	0.879865	Rim
12WPY10_123	486	9.16	0.616	0.011	0.0752	0.0011	0.59577	487.4	7.2	467.3	6.9	574	20	467.3	6.9	4.12392	Core
12WPY10_124	320	18.65	0.3336	0.0039	0.04645	0.00041	0.19203	293	3	292.7	2.5	305	19	292.7	2.5	0.102389	Single Age
12WPY10_125	346.7	20.24	0.3247	0.004	0.04517	0.00047	0.31438	285.8	3.1	284.8	2.9	316	16	284.8	2.9	0.349895	Single Age
12WPY10_126	350	21.96	0.3389	0.0056	0.04632	0.00086	0.41566	296.2	4.3	291.9	5.3	329	23	291.9	5.3	1.45172	Rim
12WPY10_126	340.3	1.695	0.624	0.011	0.0781	0.0011	0.56816	492.1	6.8	486	7	525	18	486	7	1.23959	Core
12WPY11_1	750	1.77	0.757	0.036	0.0837	0.0034	0.941	573	21	518	20	793	21	518	20	9.5986	Single Age
12WPY11_2	538	21.2	0.3602	0.006	0.04814	0.00093	0.65212	312.9	4.6	303	5.7	397	25	303	5.7	3.16395	Single Age
12WPY11_3	1120	85	0.3037	0.0084	0.0403	0.0012	0.73722	269.2	6.6	254.9	7.7	409	40	254.9	7.7	5.31204	Rim
12WPY11_3	215	1.707	5.02	0.14	0.249	0.011	0.75041	1821	24	1431	57	2304	8.8	DISC	DISC	37.8906	Core
12WPY11_4	403	4.76	1.056	0.033	0.1167	0.0029	0.774	731	16	711	17	817	21	711	17	2.73598	Single Age
12WPY11_5	493	5.83	0.457	0.02	0.0597	0.0024	0.95045	380	14	374	15	424	18	374	15	1.57895	Single Age
12WPY11_6	1470	44.1	0.363	0.015	0.04488	0.00097	0.77586	314	11	283	6	560	63	283	6	9.87261	Rim
12WPY11_6	419	5.73	3.75	0.16	0.2101	0.0063	0.66262	1580	34	1229	33	2075	55	DISC	DISC	40.7711	Core
12WPY11_7	679	13.7	0.652	0.02	0.0794	0.0023	0.887	511	12	492	14	589	17	492	14	3.7182	Single Age
12WPY11_8	59.7	1.87	1.178	0.02	0.1297	0.0026	0.71484	791	9.5	786	15	783	18	786	15	0.632111	Single Age
12WPY11_9	325	8.16	0.491	0.019	0.0559	0.0013	0.80208	404	13	350.8	8	729	43	DISC	DISC	13.1683	Single Age
12WPY11_10	575	4.64	4.14	0.12	0.2198	0.0067	0.95261	1658	24	1280	35	2158	13	DISC	DISC	40.6858	Single Age
12WPY11_11	519	14.4	0.3323	0.006	0.04562	0.00078	0.66508	292.3	4.6	288.2	4.7	346	17	288.2	4.7	1.40267	Single Age
12WPY11_12	820	60.8	0.3051	0.0065	0.0428	0.0011	0.69108	270.3	5.1	270	6.5	309	35	270	6.5	0.110988	Rim
12WPY11_12	59.5	1.057	1.341	0.051	0.1426	0.0047	0.73313	862	22	859	27	885	38	859	27	0.348028	Core
12WPY11_13	183	3.6	0.942	0.052	0.1105	0.0056	0.97305	667	28	674	33	651	22	674	33	1.04948	Single Age
12WPY11_14	472	2.11	0.4725	0.0066	0.06111	0.00098	0.49611	392.8	4.6	382.3	6	458	19	382.3	6	2.67312	Single Age
12WPY11_18	318.1	4.6	4.82	0.15	0.1608	0.0049	0.85483	1785	26	961	27	2972	18	DISC	DISC	46.1625	Single Age
12WPY11_20	361	5.8	0.3857	0.0081	0.0523	0.001	0.68541	331	5.9	328.7	6.3	360	20	328.7	6.3	0.694864	Single Age
12WPY11_21	800	46.9	0.384	0.012	0.0423	0.0014	0.15152	329.7	8.5	267.3	8.6	815	91	DISC	DISC	18.9263	Rim
12WPY11_21	540	4.71	2.21	0.11	0.1159	0.0043	0.92463	1182	33	706	25	2198	35	DISC	DISC	40.2707	Core
12WPY11_22	916	18.5	0.387	0.011	0.0514	0.0015	0.50497	332.3	8	323.2	9.2	382	34	323.2	9.2	2.73849	Rim
12WPY11_22	259.7	1.151	0.793	0.013	0.0941	0.0022	0.64275	592.6	7.3	580	13	641	20	580	13	2.12622	Core
12WPY11_23	592	1.66	0.527	0.024	0.0675	0.003	0.95426	430	16	421	18	492	16	421	18	2.09302	Single Age
12WPY11_24	850	16.9	3.16	0.12	0.1909	0.0048	0.78911	1445	30	1131	28	1970	30	DISC	DISC	21.7301	Single Age
12WPY11_25	821	5.41	0.49	0.038	0.0501	0.002	0.9556	406	26	315	12	892	81	DISC	DISC	22.4138	Single Age
12WPY11_26	495	109	0.392	0.028	0.0486	0.0014	0.47333	335	20	306.1	8.7	460	99	306.1	8.7	8.62687	Rim
12WPY11_26	177.7	1.392	9.21	0.17	0.412	0.0091	0.78853	2358	17	2223	41	2484	13	2484	13	10.5072	Core
12WPY11_27	288	66.7	0.35	0.014	0.048	0.0014	0.81094	306	11	302.3	8.7	312	31	302.3	8.7	1.20915	Rim
12WPY11_27	563	1.011	1.407	0.027	0.1453	0.0031	0.60483	891	11	874	18	947	18	874	18	1.90797	Core
12WPY11_28	706	7.83	0.756	0.014	0.0863	0.0019	0.784	571.5	8.3	533	11	709	19	533	11	6.73666	Single Age
12WPY11_29	419	2.256	0.4897	0.0094	0.0642	0.0015	0.78303	404.5	6.4	401.1	8.8	424	16	401.1	8.8	0.840544	Single Age
12WPY11_30	157	0.942	0.736	0.015	0.09	0.0016	0.44151	559.5	8.8	555.3	9.8	575	34	555.3	9.8	0.75067	Single Age
12WPY11_32	208.5	3.354	0.4366	0.0097	0.0563	0.0012	0.12994	367.6	6.8	353.1	7.1	439	29	353.1	7.1	3.9445	Single Age
12WPY11_33	582	29	0.3741	0.0084	0.0501	0.0012	0.63717	322.5	6.2	314.9	7.5	391	26	314.9	7.5	2.35659	Single Age
12WPY11_34	384	0.767	1.051	0.018	0.1187	0.0029	0.68562	728.8	9	723	17	755	23	723	17	0.795829	Single Age
12WPY11_35	489	2.191	0.5446	0.0095	0.0661	0.0012	0.58462	441.3	6.3	412.5	7.3	578	22	412.5	7.3	6.52617	Single Age
12WPY11_36	870	75	0.3082	0.006	0.04273	0.00089	0.19178	272.7	4.6	269.7	5.5	309	31	269.7	5.5	1.10011	Rim
12WPY11_36	217.9	0.884	1.01	0.022	0.1166	0.0024	0.58959	709	11	711	14	687	26	711	14	0.282087	Core
12WPY11_38	961	32	0.351	0.0083	0.047	0.0014	0.62285	305.3	6.2	296.2	8.7	385	29	296.2	8.7	2.98067	Single Age
12WPY11_39	470	24.8	0.43	0.03	0.0553	0.0031	0.95863	360	21	347	19	440	42	347	19	3.61111	Single Age
12WPY11_40	760	3.47	0.505	0.028	0.0639	0.0031	0.96029	412	19	399	19	492	24	399	19	3.15534	Single Age
12WPY11_41	406	20	0.8	0.03	0.0901	0.0034	0.84712	598	18	556	20	731	29	556	20	7.02341	Single Age
12WPY11_42	511.7	0.874	0.539	0.013	0.0679	0.0015	0.76375	438.5	8.1	423.5	9	524	21	423.5	9	3.42075	Single Age
12WPY11_43	683	15.1	0.354	0.017	0.0458	0.0016	0.68096	307	12	288.6	9.8	431	40	288.6	9.8	5.99349	Single Age
12WPY11_44	457	6.6	0.532	0.031	0.064	0.0031	0.95508	430	20	400	19	579	25	400	19	6.97674	Single Age
12WPY11_45	630	95	0.3263	0.0079	0.044	0.001	0.78094	286.5	6	277.7	6.4	352	26	277.7	6.4	3.07155	Single Age
12WPY11_46	548	40.7	0.3387	0.0045	0.04637	0.00068	0.60174	296.6	3.4	292.2	4.2	318	15	292.2	4.2	1.48348	Single Age
12WPY11_47	326	3.268	0.686	0.014	0.0833	0.002	0.54274	529.9	8.4	516	12	605	20	516	12	2.62314	Single Age
12WPY11_48	269	0.543	0.891	0.017	0.1073	0.002	0.66537	646.5	9.3	657	12	636	18	657	12	1.62413	Single Age
12WPY11_49	1309	14.64	2.004	0.066	0.122	0.0043	0.72928	1115	22	742	25	1939	23	DISC	DISC	33.4529	Single Age
12WPY11_50	581	7.18	0.598	0.016	0.0746	0.0022	0.85122	476	10	464	13	543	18	464	13	2.52101	Single Age
12WPY11_51	1142	15.4	0.3944	0.0075	0.0509	0.00087	0.81237	337.4	5.5	320	5.3	472	20	320	5.3	5.15708	Single Age
12WPY11_52	648	3.22	0.495	0.016	0.0638	0.0018	0.93024	407	11	398	11	458	20	398	11	2.2113	Single Age
12WPY11_53	608	5.87	2.409	0.068	0.1503	0.0035	0.8084	1246	20	903	20	1905	18	DISC	DISC	27.5281	Single Age
12WPY11_54	517	85	0.3361	0.0071	0.0454	0.001	0.75934	294	5.4	286.4	6.3	345	24	286.4	6.3	2.58503	Single Age
12WPY11_55	289.9	1.906	0.758	0.016	0.0912	0.0018	0.81296	573.9	9	564	11	603	15	564	11	1.72504	Single Age
12WPY11_56	367	120	0.338	0.025	0.0425	0.0014	0.60886	294	18	268.1	8.6	475	92	268.1	8.6	8.80952	Single Age
12WPY11_57	785	0.96	0.862	0.029	0.0992	0.0031	0.90882	630	15	609	18	682	19	609	18	3.33333	Single Age
12WPY11_58	474	37.4	0.398	0.014	0.052	0.0014	0.89395	340	10	326.9	8.9	416	22	326.9	8.9	3.85294	Single Age
12WPY11_61	340	57.2	0.305	0.016	0.0396	0.0018	0.50843	270	12	250	11	447	76	250	11	7.40741	Rim
12WPY11_61	681	2.69	7.34	0.19	0.3337	0.007	0.73333	2161	23	1856	34	2457	21	2457	21	24.4607	Core
12WPY11_62	452	11.6	0.411	0.019	0.0477	0.0013	0.83876	349	14	300.3	8.1	642	62	DISC	DISC	13.9542	Single Age
12WPY11_63	501	1.6	0.594	0.011	0.0737	0.0014	0.77751	474.2	6.9	458.1	8.6	542	13	458.1	8.6	3.39519	Single Age
12WPY11_64	598	24.5	0.375	0.0089	0.05024	0.00095	0.67375	323.9	6.7	316	5.8	395	26	316	5.8	2.43902	Single Age
12WPY11_65	62.1	0.86	4.18	0.11	0.276	0.0058	0.79046	1679	21	1570	29	1830	15	1830	15	14.2077	Single Age
12WPY11_66	360	1.62	5.3	0.38	0.252	0.016	0.97222	1839	64	1439	82	2372	23	DISC	DISC	39.3339	Single Age
12WPY11_67	430	46.2	0.344	0.012	0.0473	0.0011	0.57989	300.2	9.2	298	6.8	333	54	298	6.8	0.732845	Single Age
12WPY11_68	389	11	0.437	0.034	0.054	0.0031	0.95229	366	24	339	19	516	44	339	19	7.37705	Single Age
12WPY11_69	754	1.86	0.435	0.01	0.0549	0.0013	0.82797	366.4	7.3	344.6	7.9	510	19	344.6	7.9	5.94978	Single Age
12WPY11_70	371	12.1	0.3503	0.008	0.0456	0.0011	0.80067	306	6	287.7	6.5	441	18	287.7	6.5	5.98039	Single Age
12WPY11_71	200	1.22	0.698	0.03	0.0877	0.0028	0.92833	538	18	541	16	531	27	541	16	0.557621	Single Age
12WPY11_72	543	28.9	0.345	0.0067	0.04647	0.00083	0.85481	300.8	5.1	292.8	5.1	369	13	292.8	5.1	2.65957	Single Age
12WPY11_73	404	77	0.3594	0.0095	0.0486	0.0011	0.68501	311.6	7.1	306	6.8	326	26	306	6.8	1.79718	Single Age
12WPY11_74	580	40.2	0.443	0.036	0.0571	0.0034	0.94893	370	25	358	20	457	59	358	20	3.24324	Single Age
12WPY11_75	291	8.6	0.529	0.035	0.0654	0.0036	0.95783	426	23	407	22	512	30	407	22	4.46009	Single Age
12WPY11_76	650	11.3	0.497	0.019	0.0602	0.0019	0.85558	409	13	377	11	572	30	377	11	7.82396	Rim
12WPY11_76	200.2	1.747	1.102	0.023	0.1194	0.0029	0.62601	754	11	727	17	884	26	727	17	3.5809	Core
12WPY11_77	259	2.037	1.3	0.022	0.1366	0.0027	0.64469	845.4	9.8	825	15	899	21	825	15	2.41306	Single Age
12WPY11_78	633	30	0.3266	0.0065	0.04432	0.00079	0.64207	286.7	5	279.5	4.9	367	25	279.5	4.9	2.51134	Single Age
12WPY11_79	408	35.2	0.426	0.022	0.0566	0.0025	0.95591	358	15	355	15	386	22	355	15	0.837989	Single Age
12WPY11_80	282	1.089	1.406	0.033	0.1419	0.0037	0.56783	891	14	855	21	967	29	855	21	4.0404	Single Age
12WPY11_81	493	65	0.365	0.027	0.0497	0.0027	0.93139	315	19	312	17	391	61	312	17	0.952381	Rim
12WPY11_81	129.8	1.67	1.34	0.032	0.1405	0.0032	0.76859	862	14	847	18	898	22	847	18	1.74014	Core
12WPY11_82	466	3.04	0.846	0.028	0.092	0.003	0.91708	621	15	567	18	836	19	567	18	8.69565	Single Age
12WPY11_83	427	18.6	0.554	0.039	0.0579	0.0022	0.87141	449	26	362	14	913	90	DISC	DISC	19.3764	Single Age
12WPY11_84	335	2.048	1.22	0.024	0.1283	0.0023	0.80203	809	11	778	13	893	16	778	13	3.83189	Single Age
12WPY11_85	821	1.806	0.747	0.02	0.0849	0.0017	0.76875	567	11	525	10	775	20	525	10	7.40741	Single Age
12WPY11_86	666	13.2	0.47	0.023	0.0607	0.0028	0.96661	388	16	379	17	449	18	379	17	2.31959	Single Age
12WPY11_87	928	1.512	0.732	0.021	0.0864	0.0019	0.84191	556	12	534	11	658	18	534	11	3.95683	Single Age
12WPY11_88	461	3.31	0.528	0.024	0.0677	0.0031	0.90994	430	16	424	19	467	25	424	19	1.39535	Single Age
12WPY11_89	373	35.7	0.385	0.014	0.0523	0.0019	0.81718	330	11	328	12	400	35	328	12	0.606061	Single Age
12WPY11_90	423	8	0.626	0.039	0.0777	0.0043	0.97126	487	25	481	26	540	29	481	26	1.23203	Single Age
12WPY11_91	282	98.5	0.3436	0.0084	0.0458	0.0012	0.43855	299.8	6.3	288.7	7.3	408	42	288.7	7.3	3.70247	Single Age
12WPY11_92	204.6	0.533	1.108	0.022	0.1242	0.0022	0.78605	756	11	755	13	759	15	755	13	0.132275	Single Age
12WPY11_93	570	5.69	0.817	0.029	0.0922	0.0026	0.88393	605	16	571	16	781	23	571	16	5.61983	Single Age
12WPY11_94	479	53	0.3798	0.0089	0.0519	0.001	0.79027	326.6	6.5	326	6.4	343	23	326	6.4	0.183711	Single Age
12WPY11_95	536	31.2	0.3329	0.0071	0.0445	0.0011	0.51309	291.5	5.4	280.6	6.5	360	27	280.6	6.5	3.73928	Single Age
12WPY11_96	241.4	1.48	0.593	0.013	0.074	0.0017	0.73917	473.5	8.3	460	10	555	19	460	10	2.85111	Single Age
12WPY11_97	573	3.04	0.658	0.022	0.0771	0.0025	0.85474	512	14	478	15	686	18	478	15	6.64062	Single Age
12WPY11_98	554	3.54	2.022	0.069	0.1281	0.0041	0.89876	1120	23	782	25	1864	17	DISC	DISC	30.1786	Single Age
12WPY11_99	391	14.5	0.453	0.024	0.06	0.003	0.94826	376	17	375	18	417	29	375	18	0.265957	Single Age
12WPY11_100	450	0.682	0.566	0.013	0.0715	0.0016	0.84265	456.6	8.1	445.3	9.8	497	19	445.3	9.8	2.47481	Single Age
12WPY11_101	592	2.88	5.528	0.097	0.2911	0.0058	0.71006	1904	15	1647	29	2200	20	2200	20	25.1364	Single Age
12WPY11_102	340.4	20.97	0.4779	0.0081	0.05857	0.00089	0.60772	397.8	5.5	366.9	5.4	586	16	366.9	5.4	7.76772	Single Age
12WPY11_103	257.7	2.22	2.292	0.065	0.1691	0.0039	0.71118	1209	20	1007	22	1579	29	DISC	DISC	16.708	Single Age
12WPY11_104	608	11.41	0.369	0.013	0.0483	0.0012	0.55937	318.2	9.5	304	7.6	433	24	304	7.6	4.4626	Single Age
12WPY11_105	1314	2.07	0.5809	0.0089	0.0721	0.0013	0.75064	465.7	5.5	448.5	7.7	549	16	448.5	7.7	3.69336	Single Age
12WPY11_106	610	2.43	0.449	0.01	0.0574	0.0013	0.83565	376.6	7.1	361.1	8	479	18	361.1	8	4.11577	Single Age
12WPY11_107	428	8.3	0.476	0.024	0.0605	0.0024	0.80014	393	16	378	15	450	36	378	15	3.81679	Single Age
12WPY11_108	143.4	0.969	0.646	0.02	0.0776	0.0019	0.7145	506	12	482	11	622	22	482	11	4.74308	Single Age
12WPY11_109	481	5.89	0.429	0.012	0.0549	0.0015	0.8719	363.1	8.6	344.2	9.1	480	17	344.2	9.1	5.20518	Single Age
12WPY11_110	241.9	0.488	1.039	0.029	0.1134	0.0029	0.67623	725	14	692	17	829	22	692	17	4.55172	Single Age
12WPY11_111	1579	1.269	0.688	0.014	0.0836	0.002	0.76214	531.2	8.6	517	12	609	24	517	12	2.67319	Single Age
12WPY11_112	325	53	0.35	0.012	0.0473	0.0014	0.56762	304.3	9.3	297.6	8.9	339	36	297.6	8.9	2.20177	Rim
12WPY11_112	228.2	1.333	5.57	0.12	0.2621	0.0072	0.81884	1911	19	1500	37	2395	19	DISC	DISC	37.3695	Core
12WPY11_113	339	73.9	0.362	0.015	0.049	0.0025	0.36419	313	11	308	15	315	54	308	15	1.59744	Single Age
12WPY11_114	539	20	0.366	0.019	0.0474	0.002	0.87785	316	14	298	13	467	32	298	13	5.6962	Single Age
12WPY11_115	514	29.2	0.3516	0.0059	0.04882	0.00079	0.56072	305.8	4.4	307.3	4.9	307	20	307.3	4.9	0.490517	Single Age
12WPY11_116	100.3	0.937	0.647	0.02	0.083	0.0022	0.7368	507	12	514	13	493	30	514	13	1.38067	Single Age
12WPY11_117	600	8.4	0.429	0.012	0.0561	0.0016	0.89564	361.8	8.9	352	10	421	17	352	10	2.70868	Single Age
12WPY11_118	768	31	0.363	0.014	0.0482	0.0013	0.86	314	10	303.7	8.3	391	32	303.7	8.3	3.28025	Single Age
12WPY11_119	493	36	0.519	0.083	0.0508	0.004	0.95123	412	54	319	24	910	180	DISC	DISC	22.5728	Rim
12WPY11_119	348	2.57	3.459	0.088	0.1751	0.0038	0.71086	1517	20	1040	21	2249	18	DISC	DISC	31.4436	Core
12WPY11_120	1032	41.3	0.364	0.0094	0.0497	0.0016	0.77879	315.1	7	312.7	9.7	343	37	312.7	9.7	0.761663	Rim
12WPY11_120	151.8	0.667	0.832	0.019	0.1005	0.002	0.65357	614	11	617	12	624	18	617	12	0.488599	Core
12WPY11_121	327	19.3	0.5	0.033	0.064	0.0036	0.96101	407	22	399	22	451	32	399	22	1.9656	Single Age
12WPY11_122	362	9.27	0.4733	0.0083	0.0601	0.0011	0.76536	393.2	5.7	376.2	7	506	16	376.2	7	4.3235	Single Age
12WPY11_123	372	3.88	0.905	0.077	0.1033	0.0079	0.97753	637	42	630	46	706	31	630	46	1.0989	Single Age
12WPY11_124	200.1	0.514	7.75	0.17	0.3628	0.0094	0.78147	2204	19	1994	45	2415	16	2415	16	17.4327	Single Age
12WPY11_125	408	8.8	0.406	0.019	0.0536	0.002	0.94846	344	13	337	12	416	28	337	12	2.03488	Single Age
12WPY11_126	415	3.13	0.566	0.022	0.0712	0.0025	0.92947	456	14	443	15	538	19	443	15	2.85088	Single Age
12WPY11_127	1017	10.47	0.954	0.016	0.1028	0.0019	0.69225	679.5	8.2	631	11	849	17	631	11	7.1376	Single Age
12WPY11_128	439	26.3	0.356	0.015	0.0471	0.0015	0.88719	309	11	296.6	9.2	370	32	296.6	9.2	4.01294	Single Age
12WPY11_129	889	6.9	0.519	0.037	0.0646	0.0042	0.98404	418	25	403	25	506	26	403	25	3.58852	Single Age
12WPY12_1	478	28.7	0.426	0.029	0.0573	0.0035	0.97883	362	21	361	21	424	29	361	21	0.276243	Single Age
12WPY12_3	189	2.01	4.247	0.061	0.2851	0.0041	0.58033	1682	12	1616	21	1761	15	1761	15	8.23396	Single Age
12WPY12_4	839	6.2	0.51	0.028	0.0641	0.003	0.97771	415	19	400	18	509	22	400	18	3.61446	Single Age
12WPY12_5	236.5	0.79	0.855	0.015	0.101	0.002	0.62666	626.7	8	620	12	650	23	620	12	1.06909	Single Age
12WPY12_6	308	2.64	1.374	0.043	0.1403	0.0041	0.87427	880	19	846	23	971	22	846	23	3.86364	Single Age
12WPY12_7	359	4.66	0.652	0.016	0.076	0.0021	0.72832	509.1	9.6	472	13	709	28	472	13	7.28737	Single Age
12WPY12_8	621	1.858	5.879	0.075	0.3297	0.0054	0.56666	1957	11	1845	24	2086	16	2086	16	11.5532	Single Age
12WPY12_9	409	3.118	3.69	0.11	0.2592	0.007	0.86637	1567	24	1485	36	1695	19	1695	19	12.3894	Single Age
12WPY12_10	152	1.562	1.066	0.02	0.1189	0.0021	0.6297	738	10	724	12	796	24	724	12	1.89702	Single Age
12WPY12_11	261	1.476	1.66	0.033	0.161	0.004	0.68632	992	13	962	22	1070	25	962	22	3.02419	Single Age
12WPY12_12	8.05	50	5.92	0.23	0.0782	0.0031	0.49836	1964	33	485	19	4373	31	DISC	DISC	75.3055	Single Age
12WPY12_13	100	1.83	0.939	0.069	0.1071	0.0067	0.96081	663	37	658	39	711	33	658	39	0.754148	Single Age
12WPY12_14	112.5	1.385	1.039	0.027	0.1169	0.0039	0.64413	722	13	712	22	752	23	712	22	1.38504	Single Age
12WPY12_15	312.7	2.843	2.64	0.1	0.1751	0.0069	0.88557	1311	28	1040	38	1787	26	DISC	DISC	20.6712	Single Age
12WPY12_16	599	5.69	11.22	0.17	0.4076	0.006	0.76055	2540	14	2203	27	2815.7	8.8	2815.7	8.8	21.7601	Single Age
12WPY12_17	240	4.2	0.61	0.023	0.075	0.0027	0.86664	484	15	466	16	572	22	466	16	3.71901	Single Age
12WPY12_18	487	2.23	4.59	0.12	0.282	0.0077	0.8081	1746	22	1601	39	1895	19	1895	19	15.5145	Single Age
12WPY12_19	127.2	1.076	4.242	0.056	0.2794	0.0041	0.5243	1683	11	1590	20	1796	15	1796	15	11.4699	Single Age
12WPY12_20	346	5.16	0.668	0.02	0.0769	0.0023	0.87696	518	12	477	14	711	20	477	14	7.91506	Single Age
12WPY12_21	225.3	1.776	1.544	0.025	0.1611	0.0027	0.75777	947.2	9.8	963	15	924	13	963	15	1.66807	Single Age
12WPY12_22	324.5	1.882	1.3	0.033	0.1331	0.0036	0.72703	845	15	806	21	968	28	806	21	4.61538	Single Age
12WPY12_23	394.6	1.104	12.17	0.18	0.4728	0.0089	0.58922	2617	14	2495	39	2719	20	2719	20	8.23832	Single Age
12WPY12_24	121	1.65	1.323	0.032	0.138	0.0039	0.81215	854	14	832	22	919	21	832	22	2.57611	Single Age
12WPY12_25	266	1.83	0.86	0.017	0.1028	0.0019	0.79264	630.9	9.4	630	11	637	19	630	11	0.142653	Single Age
12WPY12_26	189	1.791	2.858	0.073	0.2028	0.0049	0.76156	1379	20	1190	26	1681	28	DISC	DISC	13.7056	Single Age
12WPY12_27	1086	9.57	3.16	0.13	0.1892	0.0069	0.92261	1452	32	1115	37	1957	18	DISC	DISC	23.2094	Single Age
12WPY12_28	93.3	1.899	0.894	0.018	0.1048	0.0021	0.59334	647.9	9.7	642	12	651	23	642	12	0.910634	Single Age
12WPY12_29	710	5.8	8.76	0.16	0.374	0.0067	0.75834	2311	16	2047	32	2555	12	2555	12	19.8826	Single Age
12WPY12_30	381.1	2.924	4.998	0.082	0.2983	0.0063	0.78383	1818	14	1682	31	1977	12	1977	12	14.9216	Single Age
12WPY12_31	226.6	1.503	0.659	0.018	0.0776	0.002	0.80482	513	11	482	12	656	24	482	12	6.04288	Single Age
12WPY12_32	176.8	1.239	1.61	0.024	0.158	0.0032	0.727	973.5	9.2	945	18	1037	14	945	18	2.92758	Single Age
12WPY12_33	174	3.51	12.57	0.21	0.504	0.012	0.70139	2646	16	2633	52	2664	15	2664	15	1.16366	Single Age
12WPY12_34	81.8	2.016	1.903	0.037	0.1793	0.0046	0.64429	1081	13	1068	24	1124	21	1068	24	1.20259	Single Age
12WPY12_35	92.1	2.388	0.951	0.021	0.1026	0.0024	0.69166	678	11	629	14	848	18	629	14	7.22714	Single Age
12WPY12_36	175	21.2	0.948	0.015	0.1074	0.0016	0.53579	676.3	7.8	657.4	9.6	704	18	657.4	9.6	2.79462	Single Age
12WPY12_37	472	1.243	1.472	0.029	0.1489	0.003	0.66453	920	12	898	18	967	18	898	18	2.3913	Single Age
12WPY12_38	598	1.67	0.67	0.022	0.0826	0.0025	0.90099	519	13	513	15	566	18	513	15	1.15607	Single Age
12WPY12_39	10.7	3.39	1.057	0.04	0.1106	0.0035	0.26999	738	17	676	20	895	69	676	20	8.40108	Single Age
12WPY12_40	127.7	1.348	0.996	0.016	0.1143	0.0015	0.52333	703	7.7	697.6	8.8	723	17	697.6	8.8	0.768137	Single Age
12WPY12_41	269	2.321	1.936	0.029	0.1635	0.0028	0.72188	1093.9	9.8	976	16	1327	14	DISC	DISC	10.778	Single Age
12WPY12_42	797	3.46	3.81	0.12	0.1687	0.007	0.74325	1593	25	1004	39	2500	28	DISC	DISC	36.9743	Single Age
12WPY12_43	201.5	0.91	0.841	0.013	0.0993	0.0016	0.11543	619.2	7	610.4	9.6	645	17	610.4	9.6	1.42119	Single Age
12WPY12_44	316.6	1.36	0.827	0.017	0.0987	0.0021	0.77577	612.3	9.4	607	12	646	20	607	12	0.865589	Single Age
12WPY12_45	199	0.912	4.49	0.079	0.2597	0.0041	0.67813	1727	15	1488	21	2044	16	2044	16	27.2016	Single Age
12WPY12_46	6.73	84	5.29	0.19	0.0741	0.0034	0.42261	1861	31	461	20	4259	35	DISC	DISC	75.2284	Single Age
12WPY12_47	123	3.06	1.719	0.038	0.1725	0.0041	0.2158	1014	14	1025	22	993	15	1025	22	1.08481	Single Age
12WPY12_48	841	3.62	0.841	0.013	0.0984	0.0017	0.67989	619	7	605	10	667	15	605	10	2.26171	Single Age
12WPY12_49	103.2	1.522	10.91	0.18	0.45	0.0078	0.66634	2515	16	2394	35	2605	16	2605	16	8.09981	Single Age
12WPY12_50	575	0.53	2.512	0.069	0.1603	0.0032	0.84179	1275	20	961	18	1872	18	DISC	DISC	24.6275	Single Age
12WPY12_51	632	4.4	0.753	0.043	0.0883	0.0046	0.97352	570	24	547	27	659	14	547	27	4.03509	Single Age
12WPY12_52	50.9	2.014	1.511	0.048	0.1557	0.0042	0.78225	938	20	932	24	935	27	932	24	0.639659	Single Age
12WPY12_53	537	1.041	13.6	0.23	0.4418	0.0092	0.75579	2723	17	2364	40	2988	12	2988	12	20.8835	Single Age
12WPY12_54	149.3	1.709	2.79	0.13	0.2063	0.0084	0.93615	1344	35	1207	45	1572	17	1572	17	23.2188	Single Age
12WPY12_55	270	0.99	8.45	0.31	0.348	0.012	0.94461	2282	32	1919	58	2591	12	2591	12	25.9359	Single Age
12WPY12_56	1115	2.81	0.768	0.022	0.0819	0.0019	0.89765	577	12	507	11	827	17	DISC	DISC	12.1317	Single Age
12WPY12_57	298	0.5478	0.781	0.011	0.0943	0.0018	0.5764	586.7	6.7	581	10	593	24	581	10	0.971536	Single Age
12WPY12_58	325	1.36	0.605	0.013	0.0769	0.0016	0.79958	479.7	8.1	477.4	9.4	515	13	477.4	9.4	0.479466	Single Age
12WPY12_59	354	2.06	0.505	0.018	0.0637	0.0018	0.90542	413	12	398	11	492	20	398	11	3.63196	Single Age
12WPY12_60	5.53	230	8.26	0.19	0.1052	0.0034	0.40275	2262	21	644	20	4424	30	DISC	DISC	71.5296	Single Age
12WPY12_61	211	1.188	1.586	0.022	0.1589	0.0027	0.65723	965.4	8.6	950	15	987	14	950	15	1.59519	Single Age
12WPY12_62	575	4.16	0.873	0.022	0.0982	0.0032	0.75372	636	12	604	19	746	23	604	19	5.03145	Single Age
12WPY12_63	234	1.2	5.43	0.11	0.3233	0.0073	0.73838	1887	18	1805	36	1980	19	1980	19	8.83838	Single Age
12WPY12_64	433	1.826	2.578	0.082	0.1362	0.0034	0.88255	1291	23	823	19	2170	19	DISC	DISC	36.251	Single Age
12WPY12_65	139	1.363	1.264	0.018	0.1384	0.0022	0.54015	830.5	8.3	836	12	806	18	836	12	0.662252	Single Age
12WPY12_66	123.5	1.73	0.811	0.017	0.0959	0.002	0.59604	603.5	9.3	590	12	659	25	590	12	2.23695	Single Age
12WPY12_67	60.8	1.492	0.787	0.025	0.0946	0.003	0.64396	588	14	582	17	599	42	582	17	1.02041	Single Age
12WPY12_68	89.4	0.733	1.751	0.027	0.1702	0.0032	0.48723	1027	10	1016	18	1029	21	1016	18	1.07108	Single Age
12WPY12_69	451	29.3	0.427	0.024	0.0499	0.0016	0.62364	360	17	314.1	9.8	595	64	DISC	DISC	12.75	Single Age
12WPY12_70	302.4	4.18	0.696	0.011	0.0866	0.0012	0.60243	537	6.8	535.3	7	534	20	535.3	7	0.316574	Single Age
12WPY12_71	153.6	0.621	1.479	0.024	0.1489	0.0031	0.66872	921.1	9.7	894	17	1012	16	894	17	2.94213	Single Age
12WPY12_72	141.2	1.338	1.334	0.03	0.1351	0.0033	0.79852	861	13	817	19	979	16	817	19	5.11034	Single Age
12WPY12_73	409	6.85	5.507	0.081	0.3305	0.0063	0.69765	1900	13	1840	30	1959	17	1959	17	6.07453	Single Age
12WPY12_75	36.22	1.502	2.347	0.059	0.2013	0.005	0.073026	1225	18	1182	27	1325	36	1182	27	3.5102	Single Age
12WPY12_76	1083	1.686	0.5981	0.0078	0.0722	0.0013	0.7219	475.8	5	449.5	8.1	600	17	449.5	8.1	5.52753	Single Age
12WPY12_77	249.8	0.853	1.705	0.038	0.1681	0.0034	0.72822	1014	14	1004	18	1027	17	1004	18	0.986193	Single Age
12WPY12_78	164.9	1.752	0.748	0.015	0.0901	0.0019	0.57216	566.6	8.6	556	11	585	23	556	11	1.87081	Single Age
12WPY12_79	255	0.725	1.486	0.02	0.1462	0.0022	0.71433	926.4	8	879	12	1017	11	879	12	5.11658	Single Age
12WPY12_80	203	5.7	1.337	0.069	0.1424	0.0061	0.95787	853	31	861	34	840	29	861	34	0.937866	Single Age
12WPY12_81	479	1.846	1.839	0.026	0.1746	0.0027	0.79304	1058.8	9.3	1037	15	1098	10	1037	15	2.05893	Single Age
12WPY12_82	369	1.92	0.766	0.02	0.0849	0.0028	0.87724	577	12	525	17	793	27	525	17	9.01213	Single Age
12WPY12_83	7.09	8.9	5.17	0.31	0.1243	0.0069	0.30821	1842	50	753	39	3467	92	DISC	DISC	59.1205	Single Age
12WPY12_84	184	1.191	8.86	0.13	0.3546	0.0064	0.83234	2324	13	1955	30	2662	12	2662	12	26.559	Single Age
12WPY12_85	384	1.387	10.58	0.22	0.4242	0.0097	0.84853	2484	19	2283	45	2666	14	2666	14	14.3661	Single Age
12WPY12_86	2.316	91	19.48	0.72	0.2161	0.009	0.60999	3064	35	1259	48	4668	42	DISC	DISC	73.0291	Single Age
12WPY12_87	933	3.04	0.849	0.018	0.0963	0.0022	0.83555	623.5	9.8	592	13	712	14	592	13	5.05213	Single Age
12WPY12_88	481	3.86	1.538	0.03	0.1521	0.0028	0.82563	946	12	915	16	1016	13	915	16	3.27696	Single Age
12WPY12_89	366	0.948	0.93	0.018	0.1056	0.0022	0.75643	667.1	9.4	647	13	738	21	647	13	3.01304	Single Age
12WPY12_90	141.8	1.686	2.255	0.035	0.2026	0.004	0.74704	1198	11	1189	22	1213	17	1189	22	0.751252	Single Age
12WPY12_91	126	2.19	0.625	0.03	0.0786	0.0035	0.92597	489	19	490	21	510	26	490	21	0.204499	Single Age
12WPY12_92	522	6.03	0.74	0.012	0.0888	0.0017	0.68142	562.1	7	548.2	9.8	601	16	548.2	9.8	2.47287	Single Age
12WPY12_93	526	1.28	0.734	0.045	0.0895	0.005	0.97507	552	28	551	30	582	21	551	30	0.181159	Single Age
12WPY12_94	103.7	1.31	5.468	0.094	0.3276	0.0075	0.67419	1896	14	1825	36	1976	19	1976	19	7.6417	Single Age
12WPY12_95	799	1.757	8.41	0.14	0.3679	0.0075	0.74175	2278	16	2018	36	2510	15	2510	15	19.6016	Single Age
12WPY12_96	839	4.55	0.8054	0.0095	0.095	0.0014	0.55824	599.7	5.4	586.4	8.3	649	19	586.4	8.3	2.21778	Single Age
12WPY12_97	128.5	1.147	0.992	0.033	0.1039	0.0035	0.55893	699	17	637	20	921	49	637	20	8.86981	Single Age
12WPY12_98	347	5.06	0.839	0.012	0.0984	0.0018	0.70842	618.1	6.4	605	10	653	18	605	10	2.1194	Single Age
12WPY12_99	266.8	1.138	0.985	0.011	0.1117	0.0014	0.44042	696	5.5	682.3	8	733	17	682.3	8	1.96839	Single Age
12WPY12_101	293.8	0.645	5.269	0.075	0.3005	0.005	0.57882	1867	12	1693	25	2051	14	2051	14	17.4549	Single Age
12WPY12_103	170.3	0.997	4.988	0.073	0.2889	0.0064	0.81218	1816	12	1640	33	2032	16	2032	16	19.2913	Single Age
12WPY12_104	74	1.06	5.358	0.097	0.3191	0.0057	0.70913	1878	16	1789	29	1963	14	1963	14	8.86398	Single Age
12WPY12_105	350	1.25	8.42	0.14	0.3747	0.0066	0.53689	2276	15	2060	31	2502	20	2502	20	17.6659	Single Age
12WPY12_106	8.49	153	5.19	0.16	0.0754	0.0024	0.31201	1850	26	469	14	4266	31	DISC	DISC	74.6486	Single Age
12WPY12_107	540	76	0.652	0.012	0.0804	0.002	0.53878	509.8	7.5	498	12	577	33	498	12	2.31463	Rim
12WPY12_107	647	16.05	1.651	0.035	0.1173	0.0022	0.51667	991	13	715	13	1671	23	DISC	DISC	27.8507	Core
12WPY12_108	389	1.128	0.796	0.014	0.0974	0.0022	0.81532	594.3	8	599	13	594	14	599	13	0.790846	Single Age
12WPY12_109	307	9.4	0.822	0.017	0.0982	0.0022	0.8345	608.2	9.5	604	13	647	13	604	13	0.690562	Single Age
12WPY12_110	271	1.461	1.063	0.026	0.1167	0.0031	0.80108	734	13	711	18	795	22	711	18	3.13351	Single Age
12WPY12_111	409	13.8	0.424	0.015	0.0556	0.0014	0.71399	360	10	348.7	8.4	445	33	348.7	8.4	3.13889	Single Age
12WPY12_112	294.9	2.3	0.926	0.012	0.107	0.0017	0.40702	665.4	6.2	655	10	723	23	655	10	1.56297	Single Age
12WPY12_113	104.7	1.009	1.144	0.029	0.1223	0.0028	0.69462	774	14	746	16	831	29	746	16	3.61757	Single Age
12WPY12_114	253	2.716	5.22	0.12	0.2928	0.0055	0.65753	1855	19	1655	27	2082	19	2082	19	20.5091	Single Age
12WPY12_115	5.98	-3000	4.42	0.16	0.0624	0.0024	0.41221	1715	30	390	14	4258	33	DISC	DISC	77.2595	Single Age
12WPY12_116	560	1.95	0.675	0.013	0.0852	0.002	0.83933	523.2	8.2	528	12	527	17	528	12	0.917431	Single Age
12WPY12_117	655	93.2	0.3381	0.0064	0.046	0.0011	0.29512	295.6	4.8	290.2	6.6	318	33	290.2	6.6	1.82679	Single Age
12WPY12_118	187	2.23	1.087	0.031	0.1159	0.0036	0.74573	747	15	709	20	886	25	709	20	5.08701	Single Age
12WPY12_119	194	0.4382	0.784	0.014	0.094	0.0017	0.75027	587.4	8	579	10	628	21	579	10	1.43003	Single Age
12WPY12_120	30.3	0.686	2.024	0.05	0.1987	0.0046	0.72401	1124	17	1168	25	1044	18	1168	25	3.91459	Single Age
12WPY12_121	235	3.46	1.463	0.02	0.1497	0.0029	0.56746	914.6	8.4	899	16	937	22	899	16	1.70566	Single Age
12WPY12_122	138.6	2.38	0.849	0.016	0.1013	0.0025	0.30795	623.4	8.7	622	14	651	21	622	14	0.224575	Single Age
12WPY12_123	198	0.84	4.334	0.078	0.2828	0.0067	0.71986	1702	15	1608	33	1826	18	1826	18	11.9387	Single Age
12WPY12_124	461	8.2	0.825	0.043	0.0951	0.004	0.88218	610	24	585	24	691	32	585	24	4.09836	Rim
12WPY12_124	273.9	0.86	4.157	0.077	0.2673	0.0054	0.74991	1669	15	1526	27	1868	15	1868	15	18.3084	Core
12WPY13_1	386	14.81	0.3468	0.006	0.04802	0.00055	0.45536	302.2	4.6	302.3	3.4	294	37	302.3	3.4	0.0330907	Rim
12WPY13_1	556	2.78	0.801	0.022	0.0707	0.0013	0.94911	597	13	440.4	7.6	1242	23	DISC	DISC	26.2312	Core
12WPY13_2	313	5.41	0.38	0.02	0.0516	0.0026	0.91007	327	15	324	16	335	48	324	16	0.917431	Rim
12WPY13_2	325	1.58	0.587	0.0064	0.07552	0.00065	0.8511	468.9	4.1	469.3	3.9	460	14	469.3	3.9	0.085306	Core
12WPY13_4	554	3.798	1.023	0.035	0.1072	0.0035	0.90095	715	18	656	20	897	34	656	20	8.25175	Rim
12WPY13_4	132.3	1.593	1.827	0.024	0.1808	0.0025	0.78035	1054.6	8.7	1071	14	1003	19	1071	14	1.55509	Core
12WPY13_5	434	11.4	0.2847	0.0044	0.03871	0.00048	0.28286	254.4	3.5	244.8	3	304	35	244.8	3	3.77358	Rim
12WPY13_5	98.2	0.3504	0.72	0.019	0.0867	0.0019	0.89747	550	11	536	11	579	23	536	11	2.54545	Core
12WPY13_6	307	9.42	0.3219	0.0045	0.04466	0.00052	0.54732	283.2	3.4	281.6	3.2	277	24	281.6	3.2	0.564972	Single Age
12WPY13_7	2660	31.79	0.5086	0.0059	0.06365	0.00078	0.90721	417.3	4	397.8	4.7	492	11	397.8	4.7	4.6729	Single Age
12WPY13_8	197	6.43	0.798	0.019	0.0942	0.0017	0.87538	595	11	580.4	9.9	645	22	580.4	9.9	2.45378	Single Age
12WPY13_9	169.5	0.98	0.5963	0.0091	0.07674	0.00075	0.61592	474.7	5.8	476.6	4.5	474	28	476.6	4.5	0.400253	Single Age
12WPY13_10	10.97	172	4.267	0.09	0.0532	0.0014	0.54454	1689	17	333.8	8.6	4478	37	DISC	DISC	80.2368	Single Age
12WPY13_11	160.1	13	0.736	0.016	0.0905	0.0018	0.78879	559.8	9.1	558	11	571	31	558	11	0.321543	Single Age
12WPY13_12	278.6	3.54	1.725	0.028	0.15	0.002	0.794	1017	11	901	11	1277	14	DISC	DISC	11.4061	Single Age
12WPY13_13	157.6	0.841	8.71	0.2	0.3896	0.0086	0.96941	2304	21	2119	40	2477.2	9.1	2477.2	9.1	14.4599	Single Age
12WPY13_14	139.5	1.693	1.602	0.024	0.1567	0.0022	0.86268	971.4	9.7	940	12	1045	16	940	12	3.23245	Single Age
12WPY13_15	495	12.36	0.814	0.033	0.0622	0.002	0.86129	604	19	389	12	1539	35	DISC	DISC	35.596	Rim
12WPY13_15	337.6	3.227	3.489	0.083	0.1338	0.0029	0.90085	1523	19	809	17	2734	19	DISC	DISC	46.8812	Core
12WPY13_16	795	3.31	0.5672	0.0088	0.06563	0.00096	0.91996	456	5.7	409.7	5.8	646	14	DISC	DISC	10.1535	Single Age
12WPY13_17	918	30	0.3264	0.0096	0.0456	0.0011	0.74391	286.7	7.3	287.2	6.8	299	42	287.2	6.8	0.174398	Single Age
12WPY13_18	335.9	3.95	2.75	0.23	0.1364	0.0095	0.96456	1330	63	823	54	2284	41	DISC	DISC	38.1203	Single Age
12WPY13_19	182.9	0.5446	0.715	0.0066	0.08854	0.00073	0.53763	547.6	3.9	546.9	4.3	558	18	546.9	4.3	0.127831	Single Age
12WPY13_20	206	2.21	0.6545	0.0079	0.0822	0.001	0.67544	511	4.9	509.3	6	529	20	509.3	6	0.332681	Single Age
12WPY13_21	570	8.23	0.2836	0.0036	0.03821	0.00075	0.078441	253.5	2.8	241.7	4.7	356	51	241.7	4.7	4.65483	Rim
12WPY13_21	574	1.078	0.4374	0.0087	0.0519	0.0013	0.67856	368.2	6.1	325.9	7.8	612	40	DISC	DISC	11.4883	Core
12WPY13_22	540	21.2	0.3442	0.0053	0.04744	0.00065	0.74638	300.2	4	298.8	4	314	21	298.8	4	0.466356	Single Age
12WPY13_23	86.5	0.791	1.779	0.027	0.1783	0.0034	0.78589	1037.3	9.8	1057	18	1018	23	1057	18	1.89916	Single Age
12WPY13_24	755	11.92	0.4409	0.009	0.0502	0.001	0.73423	370.8	6.3	315.6	6.3	730	34	DISC	DISC	14.8867	Rim
12WPY13_24	554	4.58	0.809	0.022	0.0655	0.0011	0.87267	601	12	408.9	6.5	1400	24	DISC	DISC	31.9634	Core
12WPY13_25	247	1.1	2.649	0.038	0.1728	0.0023	0.92354	1314	11	1027	13	1823	16	DISC	DISC	21.8417	Single Age
12WPY13_26	412	6.82	0.3809	0.0042	0.05168	0.00043	0.56687	327.6	3.1	324.8	2.6	361	21	324.8	2.6	0.854701	Single Age
12WPY13_27	250	11.7	0.3339	0.007	0.0471	0.001	0.49642	292.4	5.3	297	6.4	262	48	297	6.4	1.57319	Rim
12WPY13_27	260.1	2.33	0.4815	0.0063	0.06396	0.00062	0.67734	398.9	4.3	399.6	3.8	403	24	399.6	3.8	0.175483	Core
12WPY13_28	451	11.27	0.3061	0.0057	0.03973	0.00054	0.048948	271	4.4	251.1	3.4	400	38	251.1	3.4	7.34317	Single Age
12WPY13_29	575	2.199	0.952	0.012	0.1034	0.0014	0.87761	678.7	6.4	634.4	8	824	14	634.4	8	6.52718	Single Age
12WPY13_30	273	0.764	9.43	0.28	0.3916	0.0095	0.96083	2380	28	2128	44	2587	19	2587	19	17.7426	Single Age
12WPY13_31	150.7	2.093	1.128	0.024	0.1082	0.0013	0.28335	769	12	662.1	7.8	1056	44	DISC	DISC	13.9012	Single Age
12WPY13_32	119.8	1.701	1.436	0.022	0.149	0.0023	0.71607	903.5	9.1	895	13	921	24	895	13	0.940786	Single Age
12WPY13_33	594	31	0.2729	0.0049	0.03666	0.0007	0.60868	245	3.9	232.1	4.4	346	33	232.1	4.4	5.26531	Single Age
12WPY13_34	880	2.3	3.184	0.082	0.2038	0.0047	0.93826	1452	20	1195	25	1830	20	DISC	DISC	17.6997	Single Age
12WPY13_35	1084	27.6	0.3709	0.0068	0.04876	0.00082	0.85673	320.7	4.9	306.9	5.1	427	21	306.9	5.1	4.30309	Single Age
12WPY13_36	589	23.6	0.32	0.016	0.0417	0.0018	0.87585	282	12	263	11	436	49	263	11	6.73759	Rim
12WPY13_36	396	5.04	1.016	0.037	0.099	0.003	0.92596	710	19	608	17	1006	25	DISC	DISC	14.3662	Core
12WPY13_37	326	18.3	0.2804	0.0088	0.038	0.0011	0.75502	250.9	7	240.2	6.6	316	38	240.2	6.6	4.26465	Rim
12WPY13_37	445	2.013	0.5044	0.0081	0.06485	0.00098	0.77334	414.5	5.4	405	6	450	19	405	6	2.29192	Core
12WPY13_38	137	7.9	0.3061	0.0096	0.0374	0.0013	0.038369	271.1	7.5	236.8	8.1	580	130	DISC	DISC	12.6522	Rim
12WPY13_38	336	0.7119	2.995	0.044	0.1946	0.0026	0.93021	1405	11	1146	14	1825	10	DISC	DISC	18.4342	Core
12WPY13_39	575	15.49	0.3477	0.0081	0.0468	0.0012	0.66787	303	6.1	294.7	7.5	368	48	294.7	7.5	2.73927	Rim
12WPY13_39	290.9	5.76	0.479	0.011	0.0618	0.0012	0.85603	396.9	7.3	386.5	7.4	434	26	386.5	7.4	2.62031	Core
12WPY13_40	90.1	0.394	0.84	0.011	0.1017	0.0011	0.50641	620	6.1	624.5	6.6	591	27	624.5	6.6	0.725806	Single Age
12WPY13_41	748	3.75	0.3068	0.0072	0.0415	0.00096	0.9456	271.4	5.6	262	5.9	325	14	262	5.9	3.46352	Single Age
12WPY13_42	202.9	2.17	0.5197	0.008	0.06824	0.00086	0.82638	424.7	5.4	425.5	5.2	403	23	425.5	5.2	0.188368	Single Age
12WPY13_43	697	34	0.2709	0.0042	0.03743	0.00052	0.74481	243.4	3.3	236.9	3.2	307	24	236.9	3.2	2.6705	Single Age
12WPY13_44	544	22.3	0.2661	0.006	0.03595	0.00058	0.8384	239.5	4.8	227.7	3.6	315	32	227.7	3.6	4.92693	Single Age
12WPY13_45	495	8.18	0.335	0.014	0.0434	0.0013	0.91587	293	11	274.1	8.2	408	41	274.1	8.2	6.45051	Single Age
12WPY13_46	433	13.3	0.3452	0.0051	0.04537	0.00061	0.69427	301	3.9	286	3.8	420	28	286	3.8	4.98339	Single Age
12WPY13_47	214.7	0.644	0.8433	0.0096	0.1011	0.0011	0.72411	620.7	5.3	621	6.7	606	16	621	6.7	0.0483325	Single Age
12WPY13_48	1130	18.2	0.3366	0.0089	0.0461	0.0012	0.85303	294.5	6.8	290.7	7.5	349	39	290.7	7.5	1.29032	Rim
12WPY13_48	70.8	0.634	0.654	0.012	0.0832	0.0014	0.04923	510.6	7.2	515.3	8	505	42	515.3	8	0.920486	Core
12WPY13_49	1211	8.58	0.44	0.0064	0.04943	0.00067	0.81884	370.2	4.5	311	4.1	774	24	DISC	DISC	15.9914	Rim
12WPY13_49	645	3.72	1.023	0.019	0.0698	0.0011	0.75414	715.3	9.5	435.2	6.9	1733	17	DISC	DISC	39.1584	Core
12WPY13_50	552	10.5	0.393	0.021	0.0514	0.0028	0.87932	336	16	323	17	409	38	323	17	3.86905	Rim
12WPY13_50	789	2.523	0.5064	0.0049	0.0642	0.00065	0.80681	415.9	3.3	401.1	3.9	501	13	401.1	3.9	3.55855	Core
12WPY13_51	256.6	9.77	0.3689	0.0095	0.05027	0.00088	0.4757	318.3	7	316.1	5.4	322	30	316.1	5.4	0.691172	Single Age
12WPY13_52	1602	17.17	0.3558	0.0067	0.04523	0.00091	0.91095	309.6	4.9	285.1	5.6	460	18	285.1	5.6	7.91344	Single Age
12WPY13_53	285	11.9	0.2701	0.0066	0.03598	0.0008	0.7448	242.8	5.3	227.8	5	342	36	227.8	5	6.17792	Rim
12WPY13_53	621	8.1	0.661	0.017	0.0562	0.0015	0.90086	515	11	352.5	9	1276	23	DISC	DISC	31.5534	Core
12WPY13_54	3.372	-37	7.89	0.21	0.0837	0.0032	0.74084	2213	24	518	19	4684	45	DISC	DISC	76.5929	Single Age
12WPY13_55	395	26.4	0.2742	0.0039	0.0364	0.0006	0.29428	246	3.1	230.5	3.7	350	41	230.5	3.7	6.30081	Rim
12WPY13_55	378	6.8	0.3543	0.0062	0.04894	0.00078	0.74036	308.5	4.5	308	4.8	308	28	308	4.8	0.162075	Core
12WPY13_56	4.96	-29	7.61	0.22	0.0796	0.0027	0.57889	2181	25	494	16	4677	41	DISC	DISC	77.3498	Single Age
12WPY13_57	359.1	7.92	0.3465	0.0044	0.04716	0.00045	0.59348	302.4	3.3	297	2.8	342	21	297	2.8	1.78571	Single Age
12WPY13_58	372	1.841	2.83	0.12	0.147	0.0055	0.98829	1359	30	883	31	2238	19	DISC	DISC	35.0258	Rim
12WPY13_58	180.2	0.607	8.71	0.22	0.374	0.008	0.96161	2306	23	2047	38	2546	13	2546	13	19.5994	Core
12WPY13_59	440	8.71	0.3461	0.0035	0.04755	0.0004	0.54068	301.7	2.6	299.5	2.5	331	20	299.5	2.5	0.729201	Single Age
12WPY13_60	228	4.07	0.514	0.016	0.0663	0.0021	0.83142	421	11	414	13	480	46	414	13	1.66271	Rim
12WPY13_60	66.1	1.017	1.068	0.025	0.1231	0.0024	0.74913	737	12	748	14	694	29	748	14	1.49254	Core
12WPY13_61	518	1.258	0.4681	0.0077	0.0609	0.001	0.84495	389.6	5.3	381.1	6.1	442	19	381.1	6.1	2.18172	Single Age
12WPY13_62	449	17.8	0.307	0.016	0.0404	0.0015	0.84853	271	13	255.2	9	386	60	255.2	9	5.83026	Rim
12WPY13_62	75.3	1.086	7.677	0.094	0.3319	0.0063	0.72701	2194	11	1847	31	2530	19	2530	19	26.996	Core
12WPY13_63	373	16.1	0.2769	0.0058	0.03756	0.00068	0.6464	248.1	4.6	237.7	4.2	320	32	237.7	4.2	4.19186	Rim
12WPY13_63	601	2.18	0.466	0.01	0.0583	0.0013	0.86433	388.5	7.2	365.5	7.7	482	20	365.5	7.7	5.92021	Core
12WPY13_64	270.8	2.54	0.84	0.02	0.0911	0.0018	0.75003	619	11	562	11	822	47	562	11	9.2084	Rim
12WPY13_64	105	1.659	1.43	0.016	0.1483	0.0018	0.66687	901.5	6.8	891	10	929	21	891	10	1.16473	Core
12WPY13_65	13	0.463	1.723	0.057	0.1732	0.0037	0.59744	1015	21	1029	20	978	57	1029	20	1.37931	Single Age
12WPY13_66	1820	3.3	0.3141	0.0059	0.04166	0.00077	0.93337	277.2	4.6	263.1	4.8	376	15	263.1	4.8	5.08658	Single Age
12WPY13_67	495	35.4	0.352	0.016	0.0495	0.0025	0.85687	306	12	311	16	308	62	311	16	1.63399	Rim
12WPY13_67	34.8	1.099	11.15	0.15	0.4542	0.0075	0.831	2535	13	2413	33	2632	16	2632	16	8.32067	Core
12WPY13_68	282	10.19	0.3809	0.0066	0.05027	0.00064	0.68445	327.5	4.9	316.2	3.9	396	26	316.2	3.9	3.45038	Single Age
12WPY13_69	621	3.45	0.529	0.019	0.0616	0.0019	0.9434	430	13	385	11	640	29	DISC	DISC	10.4651	Rim
12WPY13_69	357.6	1.173	0.783	0.016	0.0869	0.0016	0.74468	586.9	8.8	536.9	9.3	793	26	536.9	9.3	8.51934	Core
12WPY13_70	421	19.9	0.3426	0.0083	0.03928	0.00048	0.69321	300.4	6.6	248.4	3	714	40	DISC	DISC	17.3103	Single Age
12WPY13_71	894	26.3	0.365	0.019	0.0477	0.0017	0.58915	316	14	300	10	342	67	300	10	5.06329	Rim
12WPY13_71	147	2.5	1.049	0.021	0.1218	0.0023	0.78558	728	10	743	13	660	25	743	13	2.06044	Core
12WPY13_72	1765	2.2	0.3513	0.0043	0.04775	0.00054	0.89058	305.6	3.2	300.7	3.3	343	11	300.7	3.3	1.6034	Single Age
12WPY13_73	530	14.4	0.348	0.022	0.0474	0.0022	0.82447	303	16	299	14	332	65	299	14	1.32013	Rim
12WPY13_73	49	0.4346	1.024	0.018	0.1198	0.0023	0.55369	716.7	8.8	729	13	651	37	729	13	1.7162	Core
12WPY13_74	142	4.81	0.339	0.018	0.0468	0.003	0.85451	296	14	295	19	300	130	295	19	0.337838	Rim
12WPY13_74	58.4	1.504	1.739	0.063	0.1709	0.006	0.90724	1020	23	1016	33	1051	29	1016	33	0.392157	Core
12WPY13_75	308	0.564	0.861	0.014	0.1007	0.0011	0.56059	630.6	7.4	618.6	6.5	659	29	618.6	6.5	1.90295	Single Age
12WPY13_76	547	12	0.549	0.049	0.0583	0.0027	0.9011	442	32	365	17	810	97	DISC	DISC	17.4208	Rim
12WPY13_76	234	1.727	2.862	0.083	0.1913	0.0043	0.97112	1369	22	1128	23	1770	13	DISC	DISC	17.6041	Core
12WPY13_77	109	3.62	0.489	0.013	0.0615	0.0012	0.87652	403.7	9.1	384.5	7.1	487	36	384.5	7.1	4.75601	Single Age
12WPY13_78	324	20.7	0.306	0.022	0.03756	0.00057	0.25792	270	16	237.7	3.5	490	140	DISC	DISC	11.963	Rim
12WPY13_78	89	1.24	0.639	0.018	0.0769	0.0018	0.90245	501	11	477	11	554	34	477	11	4.79042	Core
12WPY13_79	721	36.2	0.2556	0.0047	0.03436	0.00067	0.78152	231	3.8	217.7	4.2	326	30	217.7	4.2	5.75758	Rim
12WPY13_79	190.9	2.65	0.859	0.051	0.0919	0.0045	0.91871	627	28	566	27	791	43	566	27	9.72887	Core
12WPY13_80	838	5.9	0.3444	0.0039	0.04653	0.00054	0.83309	300.4	2.9	293.2	3.3	332	18	293.2	3.3	2.3968	Single Age
12WPY13_81	161	6.74	0.3821	0.0049	0.0512	0.00042	0.27783	328.9	3.7	321.8	2.6	375	31	321.8	2.6	2.15871	Single Age
12WPY13_82	731	12.3	0.395	0.021	0.0515	0.0021	0.83613	338	15	324	13	401	34	324	13	4.14201	Rim
12WPY13_82	252	2.639	0.784	0.015	0.0927	0.0012	0.58929	587.5	8.4	571.3	7.1	655	24	571.3	7.1	2.75745	Core
12WPY13_83	620	14.5	0.435	0.047	0.0547	0.0052	0.94842	363	34	343	32	505	77	343	32	5.50964	Rim
12WPY13_83	102	0.99	4.606	0.097	0.2933	0.0048	0.89105	1749	18	1664	26	1860	25	1860	25	10.5376	Core
12WPY13_84	543	15.7	0.36	0.034	0.0441	0.0025	0.9461	311	25	278	16	513	95	DISC	DISC	10.6109	Rim
12WPY13_84	931	11.36	1.656	0.033	0.1093	0.0018	0.80505	992	13	668	10	1779	21	DISC	DISC	32.6613	Core
12WPY13_85	283	3.37	0.961	0.027	0.0937	0.0017	0.81409	685	14	577	10	1045	36	DISC	DISC	15.7664	Single Age
12WPY13_86	820	4.56	0.5052	0.009	0.0634	0.001	0.94149	416.3	5.9	396.3	6.3	524	12	396.3	6.3	4.80423	Single Age
12WPY13_87	928	3.15	1.473	0.091	0.11	0.0053	0.99505	910	37	671	30	1541	26	DISC	DISC	26.2637	Single Age
12WPY13_88	870	2.55	4.31	0.12	0.1924	0.0047	0.96432	1695	23	1134	25	2456	10	DISC	DISC	33.0973	Single Age
12WPY13_89	521	14.1	0.3389	0.0089	0.04552	0.00058	0.44884	296.1	6.6	286.9	3.6	378	49	286.9	3.6	3.10706	Single Age
12WPY13_90	134.7	3.91	0.338	0.012	0.0477	0.0014	0.52909	295.5	9	300.5	8.5	293	78	300.5	8.5	1.69205	Rim
12WPY13_90	205.8	5.49	0.519	0.011	0.0662	0.0012	0.80761	423.9	7.4	413	7.3	493	28	413	7.3	2.57136	Core
12WPY13_91	715	5.4	0.2797	0.0053	0.03767	0.00066	0.94153	250.2	4.2	238.3	4.1	330	14	238.3	4.1	4.7562	Single Age
12WPY13_92	365.9	16	0.347	0.022	0.04754	0.00062	0.10721	302	17	299.4	3.8	320	150	299.4	3.8	0.860927	Rim
12WPY13_92	130.4	0.993	0.756	0.016	0.0932	0.0015	0.48444	571	9.2	574.4	9.1	540	32	574.4	9.1	0.595447	Core
12WPY13_93	229	2.76	0.62	0.019	0.0742	0.0018	0.91543	489	12	461	11	608	24	461	11	5.72597	Rim
12WPY13_93	215.4	1.551	0.82	0.02	0.0937	0.002	0.81386	608	11	577	12	724	32	577	12	5.09868	Core
12WPY13_94	298	1.97	0.795	0.031	0.0963	0.0032	0.94425	593	17	593	19	609	21	593	19	0	Rim
12WPY13_94	161	1.501	1.021	0.01	0.11856	0.00099	0.58381	714.4	5.2	722.2	5.7	676	20	722.2	5.7	1.09183	Core
12WPY13_95	40.4	1.162	0.909	0.016	0.1036	0.0014	0.18115	656.1	8.6	635.2	8.3	727	40	635.2	8.3	3.18549	Single Age
12WPY13_96	164.7	1.939	0.969	0.022	0.1105	0.0016	0.7341	687	11	675.3	9.5	729	31	675.3	9.5	1.70306	Single Age
12WPY13_97	611	27.8	0.631	0.026	0.0764	0.0027	0.97096	498	16	475	16	616	24	475	16	4.61847	Single Age
12WPY13_98	151.8	2.904	3.406	0.044	0.2005	0.0024	0.74084	1505	10	1178	13	1992	16	DISC	DISC	21.7276	Single Age
12WPY13_99	448	8.52	0.389	0.01	0.0519	0.001	0.65493	334.7	7.3	326	6.3	404	42	326	6.3	2.59934	Rim
12WPY13_99	200	1.729	0.733	0.022	0.0845	0.0026	0.10958	558	13	523	15	677	69	523	15	6.2724	Core
12WPY13_100	175.4	0.581	4.24	0.14	0.2577	0.008	0.9819	1679	29	1477	41	1940	17	1940	17	23.866	Single Age
12WPY13_101	475	13.25	0.293	0.014	0.0393	0.0017	0.89659	261	11	249	10	325	47	249	10	4.5977	Rim
12WPY13_101	294	3.44	0.562	0.012	0.0685	0.0013	0.89766	452.1	8	427.2	8	545	21	427.2	8	5.50763	Core
12WPY13_102	304	10.8	0.387	0.017	0.0515	0.0019	0.81297	332	12	324	12	381	49	324	12	2.40964	Single Age
12WPY13_103	400	22	0.343	0.016	0.0471	0.0028	0.80217	299	12	296	17	325	89	296	17	1.00334	Rim
12WPY13_103	403	24.2	0.8	0.014	0.0968	0.0014	0.84798	596.5	7.8	595.6	8.1	596	22	595.6	8.1	0.15088	Core
12WPY13_104	531	21.8	0.299	0.013	0.0398	0.0011	0.42549	265.5	9.8	251.8	7	354	52	251.8	7	5.16008	Rim
12WPY13_104	779	4.24	0.776	0.042	0.0836	0.0038	0.96064	582	23	517	23	820	36	DISC	DISC	11.1684	Core
12WPY13_105	645	53.6	0.3161	0.0071	0.04352	0.00092	0.77604	278.8	5.5	274.6	5.7	347	36	274.6	5.7	1.50646	Rim
12WPY13_105	177	8.8	0.561	0.028	0.0728	0.0026	0.85288	451	18	453	15	438	58	453	15	0.443459	Core
12WPY13_106	655	26.5	0.329	0.016	0.04508	0.00094	0.88606	288	12	284.2	5.8	298	60	284.2	5.8	1.31944	Rim
12WPY13_106	85.6	2.162	0.94	0.023	0.1107	0.0021	0.8535	675	12	676	12	686	27	676	12	0.148148	Core
12WPY13_107	973	34	0.338	0.032	0.0472	0.0031	0.8711	295	24	298	19	270	160	298	19	1.01695	Rim
12WPY13_107	130	2.576	0.66	0.021	0.0852	0.0024	0.85263	515	13	527	14	473	31	527	14	2.3301	Core
12WPY13_108	671	31.1	0.3135	0.0058	0.04199	0.00067	0.83127	277.3	4.5	265.1	4.1	388	22	265.1	4.1	4.39957	Single Age
12WPY13_109	290	2.01	0.41	0.0068	0.05625	0.00088	0.8181	348.6	4.9	352.8	5.3	334	23	352.8	5.3	1.20482	Single Age
12WPY13_110	340	2.14	0.655	0.023	0.0761	0.0025	0.94369	517	15	473	15	682	26	473	15	8.51064	Single Age
12WPY13_111	215.6	2.064	0.591	0.012	0.0766	0.0016	0.77305	471.4	7.4	475.5	9.5	450	30	475.5	9.5	0.86975	Single Age
12WPY13_112	522	36.4	0.3344	0.0056	0.04651	0.00086	0.84903	292.8	4.2	293	5.3	320	22	293	5.3	0.068306	Single Age
12WPY13_113	297	10.79	0.63	0.055	0.0583	0.0026	0.93467	492	35	365	16	1110	110	DISC	DISC	25.813	Rim
12WPY13_113	41.4	0.959	7.04	0.28	0.316	0.011	0.94236	2114	35	1772	53	2457	20	2457	20	27.8795	Core
12WPY13_114	88.5	1.482	7.77	0.16	0.3409	0.0074	0.88835	2203	18	1890	35	2518	14	2518	14	24.9404	Single Age
12WPY13_115	549	32.1	0.3203	0.0082	0.044	0.001	0.87398	281.9	6.3	277.8	6.3	330	25	277.8	6.3	1.45442	Single Age
12WPY13_116	513	16.72	0.368	0.012	0.0443	0.0017	0.83364	318	8.6	279	10	574	42	DISC	DISC	12.2642	Rim
12WPY13_116	534	8.79	0.5809	0.0087	0.0706	0.0011	0.74464	464.9	5.6	439.5	6.7	551	22	439.5	6.7	5.46354	Core
12WPY13_117	315	18.2	0.2762	0.0094	0.03729	0.00073	0.35757	247.5	7.5	236	4.5	335	64	236	4.5	4.64646	Rim
12WPY13_117	144	1.988	6.184	0.098	0.2835	0.0049	0.81173	2001	14	1609	25	2391	18	DISC	DISC	32.706	Core
12WPY13_118	477	7.92	0.3466	0.0063	0.04657	0.00064	0.73782	301.9	4.7	293.4	3.9	389	24	293.4	3.9	2.8155	Single Age
12WPY13_119	849	2.09	0.525	0.019	0.0615	0.0018	0.97515	428	13	384	11	655	20	DISC	DISC	10.2804	Single Age
12WPY13_120	468	12.3	0.336	0.012	0.0464	0.0017	0.53451	294.2	9.5	293	10	302	63	293	10	0.407886	Rim
12WPY13_120	74.8	0.642	0.818	0.024	0.1004	0.0027	0.80179	606	14	617	16	588	38	617	16	1.81518	Core
12WPY13_121	957	34	0.328	0.016	0.0447	0.0021	0.92446	288	12	282	13	351	45	282	13	2.08333	Rim
12WPY13_121	172	1.59	0.5694	0.0097	0.0729	0.0011	0.62388	457.3	6.3	453.4	6.8	476	29	453.4	6.8	0.852832	Core
12WPY13_122	600	7.76	0.389	0.017	0.0513	0.0018	0.77894	333	12	323	11	403	55	323	11	3.003	Rim
12WPY13_122	38.4	0.891	0.944	0.028	0.1137	0.0025	0.73356	674	15	694	14	611	47	694	14	2.96736	Core
12WPY13_123	920	30.9	0.315	0.016	0.0425	0.0026	0.94465	278	12	268	16	349	37	268	16	3.59712	Rim
12WPY13_123	203	0.797	1.694	0.021	0.1689	0.002	0.84035	1005.8	8.1	1006	11	1009	15	1006	11	0.0198847	Core
12WPY13_124	577	20.3	0.322	0.01	0.0445	0.0024	0.23534	283.5	7.7	281	15	310	150	281	15	0.881834	Rim
12WPY13_124	75.1	0.941	1.033	0.032	0.0947	0.0023	0.81227	719	16	583	14	1180	35	DISC	DISC	18.9152	Core
12WPY13_125	837	15.2	0.2872	0.0077	0.03799	0.00084	0.90772	256.2	6.1	240.3	5.2	351	26	240.3	5.2	6.20609	Rim
12WPY13_125	379	2.32	0.474	0.017	0.0607	0.0019	0.89799	393	12	380	11	458	34	380	11	3.30789	Core
12WPY13_126	780	53.6	0.2531	0.0036	0.03406	0.00046	0.64268	229	2.9	215.9	2.9	331	19	215.9	2.9	5.72052	Single Age
12WPY18_1	308	2.5	0.695	0.021	0.086	0.0021	0.93711	536	12	532	12	554	15	532	12	0.746269	Single Age
12WPY18_2	262	1.693	0.6697	0.0095	0.07945	0.00085	0.37911	520.3	5.7	492.8	5.1	647	19	492.8	5.1	5.28541	Single Age
12WPY18_3	194	0.877	1.055	0.015	0.1197	0.0011	0.34784	731	7.3	729	6.6	741	15	729	6.6	0.273598	Single Age
12WPY18_4	261	1.163	0.889	0.011	0.1054	0.001	0.64151	646.5	5.5	645.7	5.8	642	12	645.7	5.8	0.123743	Single Age
12WPY18_5	415	6.58	0.4843	0.0086	0.0631	0.001	0.85336	400.7	5.8	394.2	6.2	444	12	394.2	6.2	1.62216	Single Age
12WPY18_6	1915	27.69	0.768	0.011	0.0943	0.0012	0.9722	578.4	6.7	581	7.3	575.8	5.8	581	7.3	0.449516	Single Age
12WPY18_7	319.6	1.71	1.084	0.023	0.1204	0.0023	0.90693	745	11	733	13	785.2	8.9	733	13	1.61074	Single Age
12WPY18_8	294	8.2	0.513	0.033	0.0666	0.0035	0.9461	416	21	415	21	427	30	415	21	0.240385	Single Age
12WPY18_9	99.2	2.944	1.003	0.02	0.1138	0.0015	0.25565	705	10	694.6	8.6	740	22	694.6	8.6	1.47518	Single Age
12WPY18_10	185.8	5.22	7.055	0.099	0.3225	0.0043	0.90522	2117	12	1801	21	2444.2	5.7	2444.2	5.7	26.3154	Single Age
12WPY18_11	201.2	0.695	0.8878	0.0096	0.1048	0.0011	0.44071	646	5.4	642.3	6.4	667	14	642.3	6.4	0.572755	Single Age
12WPY18_12	174	1.58	1.343	0.017	0.1461	0.0016	0.65133	864.3	7.4	878.8	8.9	824	11	878.8	8.9	1.67766	Single Age
12WPY18_13	315	1.043	1.206	0.018	0.1314	0.0019	0.77666	803.2	8.5	796	11	835	12	796	11	0.896414	Single Age
12WPY18_14	348	58.2	0.72	0.014	0.0864	0.0013	0.81711	550	8.4	533.9	8	621	17	533.9	8	2.92727	Single Age
12WPY18_15	839	8	0.404	0.013	0.0535	0.0016	0.92195	344.1	9.7	336.1	9.9	397	14	336.1	9.9	2.32491	Rim
12WPY18_15	433.4	0.866	0.7919	0.0082	0.09614	0.00069	0.1837	592.2	4.7	591.7	4.1	596	14	591.7	4.1	0.0844309	Core
12WPY18_16	636	76	0.3595	0.0075	0.04915	0.0009	0.70916	311.6	5.6	309.3	5.5	328	16	309.3	5.5	0.738126	Single Age
12WPY18_17	81.1	1.63	0.869	0.011	0.1029	0.0012	0.27504	634.6	6	631.1	7.1	657	19	631.1	7.1	0.551529	Single Age
12WPY18_18	550	7.7	0.578	0.021	0.0719	0.0021	0.75045	462	13	447	12	552	22	447	12	3.24675	Single Age
12WPY18_19	1191	2.75	1.139	0.012	0.1222	0.0011	0.70331	771.9	5.6	743.3	6.4	860.6	9.9	743.3	6.4	3.70514	Single Age
12WPY18_20	533	161.2	0.336	0.0034	0.04641	0.00038	0.37133	294.4	2.5	292.4	2.3	313	12	292.4	2.3	0.679348	Single Age
12WPY18_21	870	12.4	0.3865	0.0078	0.05226	0.00094	0.90511	331.6	5.7	328.3	5.7	365	13	328.3	5.7	0.995175	Single Age
12WPY18_23	169	1.58	0.809	0.014	0.0952	0.0023	0.53324	601.5	8.1	586	13	637	24	586	13	2.57689	Single Age
12WPY18_24	476	157	0.3505	0.0035	0.04876	0.00038	0.37551	305	2.6	306.9	2.3	300	14	306.9	2.3	0.622951	Single Age
12WPY18_25	309	1.13	0.715	0.008	0.0881	0.0011	0.64895	547.5	4.7	544.3	6.6	566	15	544.3	6.6	0.584475	Single Age
12WPY18_26	699	1.359	0.885	0.019	0.1023	0.0019	0.94283	643	10	628	11	700	10	628	11	2.33281	Single Age
12WPY18_27	1076	61.9	0.6763	0.0083	0.08302	0.00095	0.85952	524.3	5	514.1	5.7	575.7	8.2	514.1	5.7	1.94545	Single Age
12WPY18_28	265	8.1	0.667	0.061	0.0824	0.0068	0.98468	510	38	508	40	555	31	508	40	0.392157	Single Age
12WPY18_29	192.8	1.388	0.89	0.01	0.1056	0.001	0.31886	646.9	5.6	646.9	5.8	652	14	646.9	5.8	0	Single Age
12WPY18_30	357	1.56	1.691	0.048	0.1698	0.0046	0.94902	1003	19	1010	25	978	18	1010	25	0.697906	Single Age
12WPY18_31	651	17.4	0.666	0.023	0.0823	0.0024	0.98417	517	15	510	14	566	15	510	14	1.35397	Single Age
12WPY18_32	725	1.953	0.7599	0.0058	0.09193	0.00079	0.62859	573.9	3.3	566.9	4.7	589.8	9.1	566.9	4.7	1.21972	Single Age
12WPY18_33	120	2.35	0.79	0.05	0.0968	0.0053	0.94603	593	29	595	31	599	25	595	31	0.337268	Single Age
12WPY18_35	470	1.15	5.47	0.098	0.3325	0.0052	0.96462	1894	16	1850	25	1954.1	6.9	1954.1	6.9	5.32726	Single Age
12WPY18_36	642	89.5	0.3478	0.0069	0.04804	0.00043	0.2265	303	5.2	302.5	2.7	299	30	302.5	2.7	0.165017	Rim
12WPY18_36	481	1.404	1.154	0.036	0.1188	0.0018	0.55436	778	17	724	10	924	47	724	10	6.94087	Core
12WPY18_37	479	120.1	0.3452	0.0059	0.04709	0.00058	0.64551	301	4.4	296.6	3.6	342	16	296.6	3.6	1.46179	Single Age
12WPY18_38	372	96	0.366	0.012	0.0498	0.0013	0.94521	316.4	8.9	313.4	8.1	336	22	313.4	8.1	0.948167	Single Age
12WPY18_39	519	2.864	0.5488	0.0062	0.06883	0.00061	0.53308	444.1	4	429.1	3.7	529	12	429.1	3.7	3.37762	Single Age
12WPY18_40	210	6.9	0.421	0.013	0.05143	0.00067	0.59073	356.4	8.9	323.3	4.1	593	47	323.3	4.1	9.28732	Single Age
12WPY18_41	183	0.942	0.8914	0.0098	0.1061	0.0012	0.5573	647.8	5.1	650.7	6.7	642	11	650.7	6.7	0.447669	Single Age
12WPY18_42	683	8.04	0.4113	0.0087	0.0551	0.0011	0.84139	349.6	6.2	345.8	6.8	400	15	345.8	6.8	1.08696	Single Age
12WPY18_43	92.1	0.779	0.918	0.013	0.1087	0.0012	0.35335	661.1	6.7	665.4	7.2	663	18	665.4	7.2	0.650431	Single Age
12WPY18_44	583	84	0.386	0.015	0.0529	0.0015	0.95977	331	11	332.3	9.4	341	28	332.3	9.4	0.392749	Single Age
12WPY18_45	210	1.62	0.711	0.017	0.089	0.0015	0.8659	544.4	9.9	549.7	9	542	17	549.7	9	0.973549	Single Age
12WPY18_46	97.4	1.774	6.215	0.085	0.3696	0.0047	0.85621	2006	12	2027	22	1978.1	9.3	1978.1	9.3	2.47207	Single Age
12WPY18_47	114	1.13	0.757	0.024	0.0929	0.0023	0.85479	573	14	573	14	577	22	573	14	0	Single Age
12WPY18_48	750	1.453	0.736	0.011	0.0893	0.0014	0.87591	559.6	6.3	551	8.4	611.5	9.1	551	8.4	1.53681	Single Age
12WPY18_49	96.6	1.395	0.721	0.012	0.0888	0.0011	0.41439	550.7	7.1	548.2	6.5	567	23	548.2	6.5	0.453968	Single Age
12WPY18_50	575	9.1	0.527	0.03	0.0667	0.0033	0.98416	429	20	416	20	495	22	416	20	3.0303	Single Age
12WPY18_51	407	76	0.3568	0.0056	0.04927	0.00052	0.65558	309.7	4.2	310	3.2	330	17	310	3.2	0.0968679	Single Age
12WPY18_52	741	27	0.334	0.026	0.0448	0.0032	0.98866	297	21	282	20	434	29	282	20	5.05051	Single Age
12WPY18_53	703	2.053	0.7865	0.0066	0.09581	0.0006	0.54346	589.1	3.8	589.8	3.5	596.3	8.1	589.8	3.5	0.118825	Single Age
12WPY18_54	363	3.77	0.503	0.012	0.0648	0.0014	0.88192	412.9	7.9	404.5	8.6	462	14	404.5	8.6	2.03439	Single Age
12WPY18_55	198	8.3	0.706	0.042	0.0871	0.0042	0.96572	539	25	538	25	544	28	538	25	0.185529	Single Age
12WPY18_56	99	1.663	0.918	0.015	0.1087	0.0014	0.5193	660.7	8.1	664.9	8	647	14	664.9	8	0.635689	Single Age
12WPY18_57	455	13.2	0.3901	0.0062	0.05107	0.00067	0.48849	334.3	4.5	321.1	4.1	434	19	321.1	4.1	3.94855	Single Age
12WPY18_58	500	1.551	0.634	0.022	0.0779	0.0023	0.9613	497	13	483	14	571	13	483	14	2.8169	Single Age
12WPY18_59	396	45	0.372	0.012	0.0512	0.0013	0.83746	322.4	8.8	321.8	8.1	333	21	321.8	8.1	0.186104	Single Age
12WPY18_60	615	158	0.3398	0.0059	0.04758	0.0008	0.53457	296.9	4.5	299.7	4.9	295	23	299.7	4.9	0.943078	Rim
12WPY18_60	271	0.802	0.815	0.016	0.0969	0.0016	0.65948	606.6	8.2	596.2	9.5	621	20	596.2	9.5	1.71447	Core
12WPY18_61	558.4	122	0.349	0.007	0.04874	0.00067	0.37571	303.9	5.3	306.7	4.1	294	27	306.7	4.1	0.921356	Rim
12WPY18_61	270.6	2.229	0.846	0.017	0.1008	0.0018	0.74189	622.4	9.1	619	10	625	20	619	10	0.546272	Core
12WPY18_62	562	60	0.2693	0.0074	0.03677	0.00083	0.89269	241.9	5.9	232.8	5.1	347	15	232.8	5.1	3.76189	Single Age
12WPY18_63	221	0.608	1.437	0.069	0.1513	0.0056	0.78162	906	29	907	32	921	21	907	32	0.110375	Single Age
12WPY18_64	93.5	1.191	0.867	0.013	0.1059	0.0015	0.23729	633.6	7.2	648.9	8.8	595	24	648.9	8.8	2.41477	Single Age
12WPY18_65	578	177	0.3435	0.007	0.04709	0.00049	0.48494	299.7	5.2	296.6	3	331	22	296.6	3	1.03437	Rim
12WPY18_65	57.6	0.724	0.86	0.018	0.1052	0.0019	0.39679	631	10	645	11	578	24	645	11	2.2187	Core
12WPY18_66	379	2.68	0.81	0.024	0.0976	0.0028	0.9474	601	14	600	16	604	12	600	16	0.166389	Single Age
12WPY18_67	357	119	0.3584	0.0043	0.04966	0.00042	0.38174	310.9	3.2	312.4	2.6	319	16	312.4	2.6	0.48247	Single Age
12WPY18_68	343	2.65	0.675	0.01	0.0832	0.0011	0.71158	523.5	6.3	515.3	6.7	565	12	515.3	6.7	1.56638	Single Age
12WPY18_69	244	3.41	0.823	0.042	0.0965	0.0041	0.96055	609	24	593	24	675	21	593	24	2.62726	Single Age
12WPY18_70	238	0.796	4.206	0.055	0.2464	0.0037	0.70563	1674	11	1420	19	1999.2	9.1	1999.2	9.1	28.9716	Single Age
12WPY18_71	815	142	0.347	0.0042	0.04772	0.00049	0.64059	302.4	3.2	300.5	3	311	11	300.5	3	0.628307	Rim
12WPY18_71	754	0.7	0.736	0.011	0.0897	0.0014	0.73356	559.8	6.6	553.7	8	586	18	553.7	8	1.08967	Core
12WPY18_72	322	1.458	0.8	0.011	0.0976	0.0012	0.78923	596.5	6.3	600.1	7.2	600	11	600.1	7.2	0.603521	Single Age
12WPY18_73	607	22.9	0.365	0.012	0.05	0.0012	0.90287	315.8	8.5	314.7	7.5	334	19	314.7	7.5	0.348322	Single Age
12WPY18_74	614	102	0.399	0.046	0.044	0.0027	0.97897	336	33	278	17	700	120	DISC	DISC	17.2619	Rim
12WPY18_74	569	8.4	2.929	0.071	0.1811	0.0038	0.90751	1388	18	1073	20	1920	9	DISC	DISC	22.6945	Core
12WPY18_75	759	31.8	0.3508	0.0095	0.0473	0.0012	0.69375	305.3	7.1	298	7.6	349	14	298	7.6	2.39109	Rim
12WPY18_75	29.6	0.419	1.758	0.036	0.1796	0.0032	0.54549	1031	14	1065	17	971	26	1065	17	3.29777	Core
12WPY18_76	384	1.24	0.7296	0.0063	0.08846	0.00095	0.46181	556.8	3.6	546.4	5.6	600	13	546.4	5.6	1.86782	Single Age
12WPY18_77	412	3.43	0.866	0.025	0.1028	0.0024	0.8662	634	13	631	14	654	15	631	14	0.473186	Single Age
12WPY18_78	287	0.728	0.8105	0.0084	0.09813	0.00099	0.52913	602.6	4.7	603.4	5.8	591	13	603.4	5.8	0.132758	Single Age
12WPY18_79	654	41	0.306	0.015	0.0415	0.0017	0.98158	270	11	262	11	364	21	262	11	2.96296	Single Age
12WPY18_80	100.7	0.4459	0.8047	0.0098	0.098	0.001	0.17213	599.2	5.5	602.9	6	594	18	602.9	6	0.61749	Single Age
12WPY18_81	622	111	0.3537	0.0076	0.0486	0.0012	0.78766	307.4	5.7	305.9	7.6	337	22	305.9	7.6	0.487964	Rim
12WPY18_81	472	1.796	0.8367	0.0078	0.09959	0.00075	0.46618	617.2	4.3	612	4.4	628	11	612	4.4	0.842515	Core
12WPY18_82	371	12.3	0.386	0.0069	0.0529	0.00069	0.75825	331.2	5	332.3	4.2	334	13	332.3	4.2	0.332126	Single Age
12WPY18_83	1616	26.5	0.278	0.0035	0.0378	0.00049	0.85351	249	2.8	239.1	3	350.8	8.8	239.1	3	3.9759	Single Age
12WPY18_84	804	113	0.3386	0.0043	0.04638	0.00047	0.80982	296	3.3	292.3	2.9	324	12	292.3	2.9	1.25	Single Age
12WPY18_85	361	145.1	0.3411	0.0045	0.04716	0.00044	0.45418	297.9	3.4	297	2.7	309	16	297	2.7	0.302115	Single Age
12WPY18_86	587	139	0.3716	0.0066	0.05031	0.0008	0.81534	320.6	4.9	317	5	339	13	317	5	1.12289	Single Age
12WPY18_87	528	1.862	0.7548	0.0062	0.09402	0.00087	0.62825	570.9	3.6	579.2	5.2	534	11	579.2	5.2	1.45384	Single Age
12WPY18_88	268	1.934	3.58	0.12	0.2232	0.0054	0.92235	1546	25	1303	29	1885	22	DISC	DISC	30.8753	Single Age
12WPY18_89	95.7	1.337	0.931	0.019	0.1099	0.0024	0.79368	667	10	672	14	647	15	672	14	0.749625	Single Age
12WPY18_90	469	17.4	0.603	0.012	0.0763	0.0011	0.84379	479	7.4	474.1	6.8	508	13	474.1	6.8	1.02296	Single Age
12WPY18_91	40.8	0.747	4.98	0.15	0.2961	0.0064	0.88912	1823	27	1671	32	2007	21	2007	21	16.7414	Single Age
12WPY18_92	457	9.7	0.409	0.012	0.0554	0.0014	0.8593	348.3	8.4	347.6	8.7	381	25	347.6	8.7	0.200976	Rim
12WPY18_92	167	1.159	0.928	0.013	0.1114	0.0013	0.38465	666.3	7	680.7	7.5	611	26	680.7	7.5	2.16119	Core
12WPY18_93	198	1.085	1.661	0.018	0.1713	0.0015	0.66416	994.2	7.2	1020.2	8.6	947	11	1020.2	8.6	2.61517	Single Age
12WPY18_94	97.1	1.731	7.42	0.35	0.337	0.012	0.9627	2162	42	1871	56	2436	23	2436	23	23.1938	Single Age
12WPY18_95	708	101	0.3534	0.0059	0.04846	0.00044	0.65016	307.2	4.4	305.1	2.7	325	19	305.1	2.7	0.683594	Single Age
12WPY18_96	588	2.535	0.8648	0.0064	0.10339	0.00079	0.52076	632.6	3.5	634.2	4.6	624.2	8	634.2	4.6	0.252924	Single Age
12WPY18_97	1040	22.2	0.346	0.012	0.0463	0.0013	0.85465	301.7	9.1	291.5	8.1	387	24	291.5	8.1	3.38084	Rim
12WPY18_97	193	0.47	0.8157	0.0091	0.0976	0.001	0.3769	605.5	5.1	600.3	6.1	614	11	600.3	6.1	0.858794	Core
12WPY18_98	767	2.595	0.7692	0.0053	0.09397	0.00064	0.55509	579.3	3	578.9	3.8	578.7	8.2	578.9	3.8	0.0690489	Single Age
12WPY18_99	413	1.505	0.655	0.017	0.0789	0.002	0.92675	511	10	491	12	608	11	491	12	3.91389	Single Age
12WPY18_100	152.5	0.6791	0.915	0.01	0.1084	0.001	0.32191	659.5	5.4	663.2	5.9	653	13	663.2	5.9	0.561031	Single Age
12WPY18_101	88	2	0.829	0.028	0.0992	0.0028	0.81551	611	16	609	17	616	27	609	17	0.327332	Single Age
12WPY18_102	122.9	1.471	0.748	0.01	0.09072	0.00096	0.36357	566.8	5.9	559.8	5.7	604	19	559.8	5.7	1.235	Single Age
12WPY18_103	641	38.7	0.3669	0.0071	0.05	0.00077	0.85408	317.1	5.2	315.1	4.9	345	13	315.1	4.9	0.630716	Single Age
12WPY18_104	584	128.3	0.3253	0.0031	0.04481	0.00026	0.36094	286.2	2.4	282.6	1.6	296	13	282.6	1.6	1.25786	Single Age
12WPY18_105	829	173	0.249	0.0037	0.03475	0.00041	0.59607	225.7	3	220.2	2.6	280	17	220.2	2.6	2.43686	Rim
12WPY18_105	184	0.688	0.668	0.014	0.0821	0.0014	0.58749	521.3	9	508.8	8.2	564	22	508.8	8.2	2.39785	Core
12WPY18_106	41.6	1.062	0.876	0.019	0.1046	0.002	0.39898	638	10	643	12	634	29	643	12	0.783699	Single Age
12WPY18_107	437	6.1	0.7822	0.0075	0.09548	0.00085	0.77073	587.2	4.4	587.8	5	573.8	8.4	587.8	5	0.10218	Single Age
12WPY18_108	100	9.4	0.638	0.038	0.0814	0.0041	0.87551	496	24	504	25	467	33	504	25	1.6129	Single Age
12WPY18_109	298.1	1.411	0.7418	0.0071	0.0923	0.00095	0.2333	563.3	4.1	569.1	5.6	538	14	569.1	5.6	1.02965	Single Age
12WPY18_110	1260	65.9	0.2707	0.0078	0.03711	0.00092	0.81912	243.1	6.2	234.9	5.7	356	20	234.9	5.7	3.3731	Single Age
12WPY18_111	762	41	0.3646	0.0064	0.04901	0.0007	0.81126	315.6	4.8	308.4	4.3	357	12	308.4	4.3	2.28137	Single Age
12WPY18_112	680	103	0.356	0.0072	0.04871	0.00096	0.42686	309.2	5.4	306.6	5.9	330	27	306.6	5.9	0.84088	Single Age
12WPY18_113	497	109	0.3646	0.007	0.04988	0.00076	0.76221	315.4	5.2	313.7	4.7	323	15	313.7	4.7	0.538998	Single Age
12WPY18_114	607	91	0.3471	0.0056	0.0472	0.00055	0.35011	302.5	4.2	297.3	3.4	343	25	297.3	3.4	1.71901	Single Age
12WPY18_115	628	6.33	0.515	0.011	0.0658	0.001	0.86287	421.3	7.3	410.5	6.3	482	19	410.5	6.3	2.56349	Single Age
12WPY18_116	492	150	0.36	0.0082	0.0499	0.0011	0.86564	312.1	6.1	313.7	6.8	313	17	313.7	6.8	0.512656	Rim
12WPY18_116	23.87	1.6	0.813	0.041	0.1072	0.0036	0.053839	603	23	657	21	451	85	657	21	8.95522	Core
12WPY18_117	544	16	0.375	0.01	0.0501	0.0013	0.58511	322.9	7.8	315.2	7.8	390	19	315.2	7.8	2.38464	Single Age
12WPY18_118	481	73	0.3614	0.0076	0.04752	0.00059	0.2946	313.2	5.7	299.3	3.6	416	32	299.3	3.6	4.43806	Rim
12WPY18_118	840.9	5.83	0.787	0.016	0.0922	0.0014	0.67382	589.4	9.2	568.7	8.2	660	18	568.7	8.2	3.51205	Core
12WPY18_119	651	37	0.389	0.012	0.0517	0.0013	0.95657	332.8	8.6	325.2	7.8	399	16	325.2	7.8	2.28365	Single Age
12WPY18_120	178	0.876	0.791	0.016	0.097	0.0014	0.65479	592.9	8.5	597	8.1	579	16	597	8.1	0.691516	Single Age
12WPY48_1	130.7	1.697	1.586	0.039	0.1582	0.0036	0.54274	963	15	946	20	1011	43	946	20	1.76532	Single Age
12WPY48_2	616	3.84	0.3249	0.008	0.0447	0.0013	0.64764	285.3	6.1	282	7.8	283	50	282	7.8	1.15668	Single Age
12WPY48_3	230	4.96	0.3264	0.007	0.04565	0.00081	0.024818	286.5	5.4	287.7	5	282	58	287.7	5	0.418848	Single Age
12WPY48_4	396	4.39	0.3266	0.0056	0.04543	0.00068	0.56333	286.8	4.3	286.4	4.2	268	37	286.4	4.2	0.13947	Single Age
12WPY48_5	207.6	4.6	0.3077	0.008	0.04236	0.00098	0.51365	272.1	6.2	267.4	6	296	53	267.4	6	1.72731	Single Age
12WPY48_6	139.8	5.2	0.3063	0.0076	0.04312	0.00089	0.44285	271.7	6	272.1	5.5	249	51	272.1	5.5	0.147221	Single Age
12WPY48_8	381	5.14	0.3195	0.0062	0.04208	0.00071	0.22273	282.1	4.6	265.7	4.4	394	47	265.7	4.4	5.81354	Single Age
12WPY48_9	346	3.51	0.2984	0.0067	0.04233	0.00093	0.56954	264.9	5.2	267.2	5.8	235	47	267.2	5.8	0.868252	Single Age
12WPY48_10	700	5.72	0.2953	0.0065	0.04093	0.00093	0.6859	262.5	5.1	259.4	5.6	298	40	259.4	5.6	1.18095	Single Age
12WPY48_11	495	5.99	0.306	0.01	0.0426	0.0014	0.70161	270.3	7.7	269	8.8	250	58	269	8.8	0.480947	Single Age
12WPY48_12	400	5.16	0.3081	0.0063	0.04298	0.00082	0.64135	272.5	4.9	271.2	5	272	39	271.2	5	0.477064	Single Age
12WPY48_13	471	4	0.3236	0.0073	0.0447	0.00081	0.63363	284.4	5.6	281.9	5	281	39	281.9	5	0.879044	Single Age
12WPY48_14	234	8.39	0.3185	0.0059	0.04357	0.00071	0.16353	280.6	4.5	274.9	4.4	306	53	274.9	4.4	2.03136	Single Age
12WPY48_15	250	3.3	0.34	0.011	0.0427	0.0011	0.40962	296.8	8	269.2	6.6	496	68	269.2	6.6	9.29919	Single Age
12WPY48_16	328	2.25	0.423	0.023	0.0453	0.0014	0.38505	359	16	285.6	8.9	886	98	DISC	DISC	20.4457	Single Age
12WPY48_17	41.3	0.839	0.435	0.013	0.0584	0.0011	0.12131	365.9	9.2	365.9	6.9	348	82	365.9	6.9	0	Single Age
12WPY48_18	235	2.01	0.756	0.012	0.093	0.0015	0.62061	572.3	6.7	574.5	8.5	573	33	574.5	8.5	0.384414	Single Age
12WPY48_19	319	6.67	0.3253	0.0054	0.04514	0.00084	0.55649	285.8	4.1	284.6	5.2	303	36	284.6	5.2	0.419874	Single Age
12WPY48_20	360	11.4	0.3343	0.0062	0.04674	0.00092	0.52766	292.7	4.7	294.4	5.7	262	43	294.4	5.7	0.580799	Single Age
12WPY48_21	600	11.2	0.3193	0.0077	0.044	0.0012	0.61542	281.1	5.9	277.6	7.1	298	51	277.6	7.1	1.24511	Single Age
12WPY48_22	582	10.13	0.317	0.0082	0.0437	0.0012	0.63513	279.2	6.3	275.8	7.5	257	56	275.8	7.5	1.21777	Single Age
12WPY48_23	80.5	3.14	0.3085	0.0097	0.0426	0.00077	0.19866	274.4	7.5	268.9	4.8	286	73	268.9	4.8	2.00437	Single Age
12WPY48_24	212	5.1	0.3121	0.0071	0.04385	0.00086	0.51216	276.3	5.4	276.6	5.3	261	47	276.6	5.3	0.108578	Single Age
12WPY48_25	360	6.77	0.3217	0.0084	0.0453	0.0011	0.60094	283.6	6.3	285.6	7	247	49	285.6	7	0.705219	Single Age
12WPY48_26	741	14.29	0.3114	0.0062	0.04322	0.00087	0.59662	275	4.8	272.7	5.3	261	44	272.7	5.3	0.836364	Single Age
12WPY48_27	416	0.698	1.648	0.037	0.1645	0.0045	0.6876	988	14	981	25	1003	43	981	25	0.708502	Single Age
12WPY48_28	245	6.4	0.3135	0.0062	0.0436	0.00056	0.37712	276.7	4.8	275.1	3.5	318	43	275.1	3.5	0.578244	Single Age
12WPY48_30	461	2.799	0.3212	0.0057	0.04513	0.00076	0.5264	282.7	4.4	284.5	4.7	265	35	284.5	4.7	0.636717	Single Age
12WPY48_31	352	11.4	0.3137	0.0081	0.0438	0.0012	0.55956	276.7	6.3	276.2	7.6	239	56	276.2	7.6	0.180701	Single Age
12WPY48_32	707	26.9	0.3107	0.0051	0.04312	0.00072	0.60242	274.5	3.9	272.1	4.4	298	33	272.1	4.4	0.874317	Single Age
12WPY48_33	401	8.3	0.3207	0.0089	0.0442	0.0014	0.66152	282	6.9	278.8	8.8	260	59	278.8	8.8	1.13475	Single Age
12WPY48_34	288	7	0.3175	0.0079	0.04481	0.00097	0.53742	279.6	6.1	282.5	6	277	55	282.5	6	1.0372	Single Age
12WPY48_35	197	4.33	0.3215	0.0073	0.0449	0.0011	0.43526	282.8	5.6	283.2	6.7	274	53	283.2	6.7	0.141443	Single Age
12WPY48_36	611	5.14	0.3312	0.0055	0.04629	0.00078	0.59727	290.3	4.2	291.7	4.8	263	36	291.7	4.8	0.48226	Single Age
12WPY48_37	391	10.79	0.3063	0.0072	0.04179	0.00088	0.62057	271.1	5.6	264.7	5.6	313	42	264.7	5.6	2.36075	Single Age
12WPY48_38	498	3.599	0.3052	0.0053	0.04307	0.00077	0.60992	270.3	4.1	271.8	4.8	266	35	271.8	4.8	0.554939	Single Age
12WPY48_39	370	7.26	0.3124	0.0071	0.0437	0.001	0.58491	275.8	5.5	275.9	6.2	258	50	275.9	6.2	0.0362582	Single Age
12WPY48_40	335	5.77	0.325	0.0078	0.0449	0.0012	0.67355	286.1	5.8	283.3	7.4	272	47	283.3	7.4	0.978679	Single Age
12WPY48_41	284	5.86	0.3088	0.0082	0.0437	0.0013	0.60094	272.9	6.4	275.5	8.1	213	55	275.5	8.1	0.95273	Single Age
12WPY48_42	1300	99	0.3123	0.0056	0.04324	0.00091	0.68147	275.7	4.3	272.9	5.6	292	37	272.9	5.6	1.0156	Single Age
12WPY48_43	339	6.99	0.3103	0.0057	0.04255	0.00063	0.49465	274.3	4.4	268.6	3.9	323	41	268.6	3.9	2.07802	Single Age
12WPY48_44	290.8	3.356	0.3153	0.0059	0.04344	0.00076	0.59497	278.1	4.6	274.1	4.7	294	40	274.1	4.7	1.43833	Single Age
12WPY48_45	439	6.19	0.3071	0.0073	0.0424	0.0012	0.62757	271.6	5.6	267.9	7.5	270	55	267.9	7.5	1.3623	Single Age
12WPY48_46	1520	30	0.3211	0.0065	0.0448	0.0011	0.74627	282.5	5	282.2	6.8	302	39	282.2	6.8	0.106195	Single Age
12WPY48_47	671	5.91	0.3244	0.0046	0.04556	0.00072	0.53535	285.2	3.6	287.2	4.4	254	32	287.2	4.4	0.701262	Single Age
12WPY48_48	308	31	0.921	0.028	0.1069	0.0039	0.74875	662	15	654	23	685	49	654	23	1.20846	Rim
12WPY48_48	89.7	0.981	1.328	0.024	0.1421	0.003	0.46311	858	11	856	17	877	42	856	17	0.2331	Core
12WPY48_49	434	3.91	0.3003	0.0074	0.0411	0.00098	0.7057	266.3	5.7	259.6	6	292	41	259.6	6	2.51596	Single Age
12WPY48_50	350.9	5.52	0.3187	0.0063	0.04405	0.00095	0.7249	280.7	4.9	277.8	5.9	301	39	277.8	5.9	1.03313	Single Age
12WPY48_51	574	1.16	0.654	0.015	0.0817	0.0014	0.81041	511.3	9.1	506.4	8.5	544	29	506.4	8.5	0.958341	Single Age
12WPY48_52	144.2	4.42	0.331	0.0075	0.04607	0.00092	0.41269	290	5.7	290.3	5.7	276	55	290.3	5.7	0.103448	Single Age
12WPY48_53	430	3.59	0.3042	0.0078	0.0431	0.0012	0.59013	270.9	5.8	271.7	7.3	226	53	271.7	7.3	0.295312	Single Age
12WPY48_54	255.8	3.826	0.317	0.008	0.0436	0.0011	0.54364	279.3	6.2	275.3	6.9	316	56	275.3	6.9	1.43215	Single Age
12WPY48_55	674	5.63	0.2986	0.0054	0.04131	0.00091	0.5364	265.1	4.2	260.9	5.6	291	48	260.9	5.6	1.58431	Single Age
12WPY48_56	479	3.65	0.301	0.004	0.04185	0.00049	0.50977	267.1	3.1	264.3	3	289	34	264.3	3	1.0483	Single Age
12WPY48_57	644	5.2	0.3184	0.0082	0.0437	0.0013	0.73455	280.3	6.3	276.5	7.8	284	48	276.5	7.8	1.35569	Single Age
12WPY48_58	684	16.5	0.3208	0.0054	0.04322	0.00079	0.52932	282.3	4.2	272.8	4.9	322	47	272.8	4.9	3.36521	Single Age
12WPY48_59	467	6.14	0.3378	0.0067	0.0478	0.0011	0.52619	295.3	5.1	300.7	6.8	270	48	300.7	6.8	1.82865	Single Age
12WPY48_60	245	4.36	0.3057	0.0072	0.0422	0.00093	0.45958	270.5	5.6	266.4	5.8	307	54	266.4	5.8	1.51571	Single Age
12WPY48_61	585	4.52	0.3086	0.0065	0.0425	0.0012	0.64863	272.9	5	268.2	7.1	322	48	268.2	7.1	1.72224	Single Age
12WPY48_62	556	5.54	0.3142	0.0062	0.04321	0.00093	0.61323	277.2	4.8	272.6	5.7	313	43	272.6	5.7	1.65945	Single Age
12WPY48_63	283.5	5.54	0.3252	0.0085	0.0447	0.0012	0.73284	285.5	6.4	281.7	7.2	292	49	281.7	7.2	1.331	Single Age
12WPY48_64	270.3	4.98	0.3228	0.008	0.04386	0.00078	0.50966	283.7	6.1	276.7	4.8	336	51	276.7	4.8	2.4674	Single Age
12WPY48_65	379	13.8	0.3266	0.0069	0.04512	0.00094	0.51384	286.7	5.3	284.5	5.8	329	42	284.5	5.8	0.767353	Single Age
12WPY48_66	286.5	3.908	0.2946	0.0052	0.04115	0.00078	0.45058	262	4.1	259.9	4.8	270	44	259.9	4.8	0.801527	Single Age
12WPY48_67	237	3.39	0.369	0.017	0.0443	0.0015	0.15399	317	12	279.5	9.1	565	83	DISC	DISC	11.8297	Single Age
12WPY48_68	388	4.68	0.3036	0.0048	0.04189	0.00054	0.35546	269.5	3.6	264.5	3.4	304	38	264.5	3.4	1.85529	Single Age
12WPY48_69	226	5.104	0.3045	0.0055	0.04257	0.00068	0.49454	269.7	4.3	268.7	4.2	304	46	268.7	4.2	0.370782	Single Age
12WPY48_70	323	4.71	0.3212	0.0085	0.0435	0.0012	0.54643	283.2	6.3	274.3	7.1	326	60	274.3	7.1	3.14266	Single Age
12WPY48_71	693	6.38	0.3098	0.005	0.04214	0.00092	0.62583	274.4	3.8	266.1	5.7	352	39	266.1	5.7	3.02478	Single Age
12WPY48_72	180	4.71	0.736	0.019	0.0896	0.0021	0.2931	559	11	553	12	574	44	553	12	1.07335	Single Age
12WPY48_73	431	5.46	0.3143	0.0076	0.04308	0.00091	0.69899	277.2	5.8	271.9	5.6	296	43	271.9	5.6	1.91198	Single Age
12WPY48_74	211	5.46	0.3213	0.006	0.0443	0.00086	0.40074	282.7	4.6	279.4	5.3	292	51	279.4	5.3	1.16732	Single Age
12WPY48_75	298	4.74	0.3116	0.0065	0.04377	0.00093	0.62445	275.2	5	276.1	5.7	281	45	276.1	5.7	0.327035	Single Age
12WPY48_76	415	5.08	0.3221	0.0063	0.04462	0.0009	0.61322	283.4	4.8	281.4	5.6	290	45	281.4	5.6	0.705716	Rim
12WPY48_76	117.7	1.1	0.421	0.014	0.0563	0.0017	0.41235	356.6	9.9	353	11	376	79	353	11	1.00953	Core
12WPY48_77	406	4.1	0.3215	0.0055	0.04444	0.00088	0.53952	282.9	4.3	280.2	5.4	290	44	280.2	5.4	0.954401	Single Age
12WPY48_78	265.1	3.71	0.881	0.016	0.1038	0.0018	0.67866	641.7	8.8	636	11	643	27	636	11	0.888266	Single Age
12WPY48_79	680	45	0.3324	0.0078	0.0462	0.0011	0.77846	291.9	6	291.2	6.5	298	37	291.2	6.5	0.239808	Single Age
12WPY48_80	159	6.29	0.3171	0.0072	0.04322	0.00092	0.34898	279.4	5.6	272.7	5.7	305	61	272.7	5.7	2.398	Single Age
12WPY48_81	285	9.35	0.3101	0.0045	0.04359	0.00044	0.45104	274.1	3.5	275	2.7	273	36	275	2.7	0.328347	Single Age
12WPY48_82	490	5.04	0.3157	0.0058	0.04359	0.00086	0.68983	279.1	4.6	275	5.3	299	38	275	5.3	1.46901	Single Age
12WPY48_83	305	3.673	0.3068	0.0073	0.04118	0.00062	0.37812	271.4	5.6	260.1	3.8	342	47	260.1	3.8	4.1636	Single Age
12WPY48_84	406	10.38	0.3341	0.0057	0.04607	0.00087	0.53418	292.5	4.4	290.3	5.3	293	38	290.3	5.3	0.752137	Single Age
12WPY48_85	211	4.22	0.3181	0.008	0.0438	0.0012	0.44527	280.3	6.1	276.5	7.3	304	56	276.5	7.3	1.35569	Single Age
12WPY48_86	303	3.06	0.3084	0.0074	0.0435	0.001	0.66169	273.3	5.6	275.1	6.2	259	42	275.1	6.2	0.658617	Single Age
12WPY48_87	320	18.3	0.3411	0.0071	0.04725	0.00079	0.19792	297.8	5.4	297.6	4.8	313	55	297.6	4.8	0.0671592	Single Age
12WPY48_88	337	4.85	0.3087	0.0074	0.0428	0.001	0.66327	273.6	5.8	271.3	6.4	268	43	271.3	6.4	0.840643	Single Age
12WPY48_89	1052	5.97	0.3049	0.0063	0.04145	0.00089	0.63428	270	4.9	261.8	5.5	310	44	261.8	5.5	3.03704	Single Age
12WPY48_90	57.9	30.1	0.884	0.048	0.00886	0.00048	0.62799	644	26	56.9	3.1	4760	72	DISC	DISC	91.1646	Single Age
12WPY48_91	467.7	5.78	0.3101	0.0081	0.0434	0.0013	0.71221	273.8	6.3	273.8	8.1	265	50	273.8	8.1	0	Single Age
12WPY48_92	650	9.57	0.3167	0.0067	0.04319	0.00097	0.69581	279.1	5.2	272.5	6	332	43	272.5	6	2.36474	Single Age
12WPY48_93	500	3.77	0.3258	0.0051	0.04476	0.00057	0.60122	286.2	3.9	282.3	3.5	316	32	282.3	3.5	1.36268	Single Age
12WPY48_94	263.1	4.83	0.3184	0.0071	0.04371	0.00096	0.53698	280.4	5.5	275.7	5.9	274	50	275.7	5.9	1.67618	Single Age
12WPY48_95	170	5.3	0.334	0.015	0.0455	0.0016	0.47595	292	11	287	9.8	286	76	287	9.8	1.71233	Single Age
12WPY48_96	532	3.89	0.3258	0.0069	0.04396	0.00092	0.627	286.1	5.2	277.3	5.7	357	43	277.3	5.7	3.07585	Single Age
12WPY48_97	304.8	7.24	0.3141	0.0061	0.0442	0.00094	0.54535	277.2	4.7	278.8	5.8	253	44	278.8	5.8	0.577201	Single Age
12WPY48_98	290.1	11.72	0.2967	0.0066	0.0414	0.001	0.66013	263.6	5.1	261.3	6.3	296	43	261.3	6.3	0.872534	Single Age
12WPY48_99	674	3.88	0.3147	0.0053	0.04344	0.00066	0.65284	278.2	4	274.1	4.1	298	32	274.1	4.1	1.47376	Single Age
12WPY48_100	159.1	5.54	0.3103	0.0064	0.04312	0.00073	0.50462	274.2	4.9	272.1	4.5	315	45	272.1	4.5	0.765864	Single Age
12WPY48_101	56.5	5.17	0.435	0.037	0.00576	0.0004	0.18798	366	27	37	2.6	4450	140	DISC	DISC	89.8907	Single Age
12WPY48_102	134.3	3.66	0.3008	0.0087	0.04099	0.00093	0.23157	266.8	6.8	258.9	5.7	350	70	258.9	5.7	2.96102	Single Age
12WPY48_103	210	4.34	0.2993	0.0069	0.03986	0.00084	0.64451	265.6	5.4	252	5.2	372	42	252	5.2	5.12048	Single Age
12WPY48_104	1200	18.4	0.3056	0.0082	0.0423	0.0015	0.66545	271.1	6.5	266.8	9.3	269	60	266.8	9.3	1.58613	Single Age
12WPY48_105	289	7.6	0.2995	0.0069	0.0421	0.001	0.72433	266.5	5.5	266	6.4	286	41	266	6.4	0.187617	Single Age
12WPY48_106	1850	5.23	0.2778	0.0046	0.0373	0.00086	0.83807	248.8	3.7	236	5.3	390	34	236	5.3	5.14469	Single Age
12WPY48_107	339.8	3.021	0.3182	0.0054	0.04337	0.00062	0.32874	280.4	4.1	273.6	3.8	312	47	273.6	3.8	2.42511	Single Age
12WPY48_108	324	0.204	0.579	0.04	0.04211	0.00091	0.35773	462	26	265.9	5.6	1580	120	DISC	DISC	42.4459	Single Age
12WPY48_109	557	10.4	0.3147	0.0051	0.0441	0.00068	0.47152	277.7	3.9	278.2	4.2	280	37	278.2	4.2	0.18005	Single Age
12WPY48_110	800	18	0.3154	0.0057	0.04344	0.00077	0.59464	278.1	4.4	274.1	4.8	303	33	274.1	4.8	1.43833	Single Age
12WPY48_111	205	5.29	0.3385	0.0092	0.0439	0.0012	0.46382	296.5	7.1	276.6	7.5	436	63	276.6	7.5	6.71164	Single Age
12WPY48_112	203	6.05	0.3168	0.0068	0.04373	0.00085	0.50858	279.2	5.2	275.9	5.2	291	46	275.9	5.2	1.18195	Single Age
12WPY48_113	252	1.21	11.25	0.29	0.463	0.015	0.83217	2539	24	2445	66	2603	39	2603	39	6.06992	Single Age
12WPY48_115	222	3.82	0.315	0.013	0.0414	0.0019	0.54497	277	10	262	12	355	77	262	12	5.41516	Single Age
12WPY48_116	327.9	4.13	0.3026	0.0056	0.04182	0.00079	0.50053	268.2	4.4	264	4.9	286	47	264	4.9	1.566	Single Age
12WPY48_117	212	3.56	0.3181	0.0079	0.0431	0.001	0.54101	280.1	6.1	272.2	6.4	347	54	272.2	6.4	2.82042	Single Age
12WPY48_118	350	6.24	0.3408	0.0091	0.0486	0.0016	0.72709	297.3	6.9	305.7	9.7	215	51	305.7	9.7	2.82543	Single Age
12WPY48_119	328	4.22	0.2953	0.0052	0.04131	0.00053	0.2899	262.6	4.1	261	3.3	292	45	261	3.3	0.609292	Single Age
12WPY48_120	272	2.562	0.3198	0.0058	0.04306	0.00075	0.48726	281.6	4.4	271.7	4.7	357	44	271.7	4.7	3.51563	Single Age
12WPY48_121	498	3.848	0.3152	0.0074	0.04363	0.00093	0.71636	278	5.7	275.3	5.7	307	43	275.3	5.7	0.971223	Single Age
12WPY48_122	441	6.81	0.3237	0.0069	0.04402	0.00096	0.67852	284.5	5.3	277.6	5.9	338	38	277.6	5.9	2.42531	Single Age
12WPY48_123	622	18.5	1.863	0.035	0.1858	0.004	0.7763	1067	12	1098	22	996	27	1098	22	2.90534	Single Age
12WPY48_124	290	3.91	0.3245	0.0082	0.0444	0.0012	0.47228	284.9	6.3	279.8	7.7	307	60	279.8	7.7	1.7901	Single Age
13WPY05_1	505	48	0.44	0.028	0.0464	0.0011	0.24626	372	20	292.4	6.8	800	140	DISC	DISC	21.3978	Single Age
13WPY05_2	293.5	3.92	0.669	0.016	0.0821	0.0018	0.90446	519.3	9.5	509	11	573	22	509	11	1.98344	Single Age
13WPY05_3	250	2.155	0.7115	0.0087	0.0892	0.0012	0.55976	545.5	5.1	550.9	6.9	524	30	550.9	6.9	0.989918	Single Age
13WPY05_4	1090	28.5	0.381	0.018	0.0501	0.0024	0.61064	328	13	315	15	425	94	315	15	3.96341	Rim
13WPY05_4	116.9	1.928	0.808	0.012	0.0975	0.0012	0.40986	601.2	6.6	599.6	7.1	598	36	599.6	7.1	0.266134	Core
13WPY05_5	49.5	1.218	0.912	0.022	0.1061	0.0025	0.65003	659	12	650	14	698	43	650	14	1.36571	Single Age
13WPY05_6	232.7	50.9	0.3381	0.0059	0.04715	0.00063	0.23129	295.6	4.4	297	3.9	289	40	297	3.9	0.473613	Single Age
13WPY05_7	950	67	0.35	0.018	0.0471	0.0026	0.92737	304	14	296	16	336	39	296	16	2.63158	Rim
13WPY05_7	195.5	1.64	0.886	0.025	0.1082	0.0031	0.72606	644	14	662	18	579	48	662	18	2.79503	Core
13WPY05_8	118.5	1.31	7.79	0.22	0.278	0.0064	0.92628	2206	24	1580	32	2848	17	DISC	DISC	44.5225	Single Age
13WPY05_9	248	74	0.279	0.018	0.0385	0.0012	0.29338	250	14	243.5	7.6	280	140	243.5	7.6	2.6	Rim
13WPY05_9	651	1.564	0.6427	0.0086	0.07709	0.00095	0.82498	503.7	5.3	478.7	5.7	587	18	478.7	5.7	4.96327	Core
13WPY05_10	328	13.2	0.302	0.0073	0.0407	0.0011	0.79419	267.8	5.7	256.9	6.7	360	35	256.9	6.7	4.0702	Rim
13WPY05_10	23.44	0.454	0.69	0.023	0.0851	0.0022	0.53004	532	14	526	13	530	82	526	13	1.12782	Core
13WPY05_11	1072	25.14	0.365	0.013	0.0496	0.0013	0.68129	315	10	312.3	7.8	303	82	312.3	7.8	0.857143	Rim
13WPY05_11	114.8	2.752	0.627	0.014	0.0803	0.0015	0.79946	494	8.7	497.6	9	484	27	497.6	9	0.728745	Core
13WPY05_12	411	5.31	0.408	0.018	0.0524	0.0018	0.95911	346	13	329	11	432	29	329	11	4.91329	Single Age
13WPY05_13	443	7.7	0.3482	0.0086	0.0458	0.0011	0.83723	302.9	6.5	288.4	7	378	28	288.4	7	4.78706	Single Age
13WPY05_14	298.9	1.46	0.625	0.011	0.077	0.0012	0.74234	493.1	6.7	478.1	7.1	555	25	478.1	7.1	3.04198	Single Age
13WPY05_15	206	6.2	0.4156	0.0098	0.0553	0.0012	0.38092	352.8	7	347.1	7.1	381	58	347.1	7.1	1.61565	Rim
13WPY05_15	223.1	0.618	0.813	0.014	0.0989	0.0017	0.59776	603.6	8	608	10	573	35	608	10	0.72896	Core
13WPY05_16	693	3.93	0.4867	0.0075	0.06248	0.00086	0.90189	402.5	5.1	390.7	5.2	472	19	390.7	5.2	2.93168	Single Age
13WPY05_17	41.7	0.919	0.894	0.02	0.1067	0.0025	0.46027	648	10	653	14	660	51	653	14	0.771605	Single Age
13WPY05_19	414	0.634	0.78	0.012	0.0951	0.0014	0.73506	585.2	7.1	585.7	8.1	560	23	585.7	8.1	0.0854409	Single Age
13WPY05_20	202	2.734	0.7118	0.0098	0.0874	0.001	0.59185	545.6	5.9	540.1	5.9	560	27	540.1	5.9	1.00806	Single Age
13WPY05_21	566	5.03	0.488	0.018	0.0585	0.0019	0.92827	402	12	366	12	578	28	366	12	8.95522	Single Age
13WPY05_22	105.8	1.231	0.913	0.015	0.1023	0.0016	0.33921	658.2	7.8	627.7	9.6	767	41	627.7	9.6	4.63385	Single Age
13WPY05_23	349	27.4	0.564	0.02	0.0662	0.0024	0.72025	454	13	413	14	623	56	413	14	9.03084	Rim
13WPY05_23	199.7	6.07	1.221	0.021	0.1336	0.0023	0.80696	809.7	9.5	808	13	818	24	808	13	0.209954	Core
13WPY05_24	231	2.23	0.516	0.012	0.0662	0.0019	0.68839	422.4	7.8	413	11	493	52	413	11	2.22538	Rim
13WPY05_24	448	0.786	0.716	0.01	0.0872	0.0012	0.57277	548.4	6.1	538.8	7.2	588	28	538.8	7.2	1.75055	Core
13WPY05_25	1230	45	0.346	0.024	0.0466	0.0032	0.97837	301	18	294	20	377	37	294	20	2.32558	Rim
13WPY05_25	286	4.14	0.661	0.018	0.0825	0.0021	0.91623	514	11	511	13	521	25	511	13	0.583658	Core
13WPY05_26	320.2	0.683	0.8524	0.0089	0.1033	0.0011	0.6614	625.8	4.9	633.6	6.3	612	19	633.6	6.3	1.2464	Single Age
13WPY05_27	210	1.225	1.57	0.12	0.077	0.0053	0.06302	947	44	477	31	2380	180	DISC	DISC	49.6304	Single Age
13WPY05_28	382	4.99	0.716	0.019	0.085	0.0015	0.78608	547	11	525.7	8.8	641	35	525.7	8.8	3.89397	Single Age
13WPY05_30	363	136	0.371	0.0077	0.0512	0.001	0.69839	320.2	5.7	322	6.3	344	35	322	6.3	0.562149	Rim
13WPY05_30	186.6	1.428	0.761	0.019	0.0946	0.0019	0.86386	574	11	582	11	559	37	582	11	1.39373	Core
13WPY05_31	240	54	0.3523	0.0078	0.0486	0.001	0.73411	306.2	5.9	305.6	6.3	339	32	305.6	6.3	0.19595	Single Age
13WPY05_32	254	0.411	0.777	0.017	0.096	0.0018	0.90389	584.7	9.3	591	11	581	21	591	11	1.07748	Single Age
13WPY05_33	627	21.3	0.436	0.012	0.056	0.0015	0.80251	366.9	8.3	351.4	9.2	472	41	351.4	9.2	4.22458	Single Age
13WPY05_34	511	10.1	0.432	0.017	0.0586	0.0019	0.88115	364	12	367	12	402	47	367	12	0.824176	Rim
13WPY05_34	146.8	1.855	0.765	0.018	0.0934	0.0018	0.64961	578	10	575	11	568	39	575	11	0.519031	Core
13WPY05_35	223	22.8	0.428	0.015	0.0558	0.0016	0.61676	361	11	350	10	387	76	350	10	3.04709	Rim
13WPY05_35	17.84	2.31	0.89	0.043	0.1082	0.0036	0.5021	647	24	662	21	607	91	662	21	2.31839	Core
13WPY05_36	71.6	1.727	9.87	0.14	0.4505	0.0059	0.8211	2422	13	2397	26	2449	13	2449	13	2.12332	Single Age
13WPY05_37	679	52.2	5.65	0.12	0.333	0.0064	0.91833	1924	18	1852	31	1991	15	1991	15	6.98142	Single Age
13WPY05_38	213.6	0.6317	1.031	0.016	0.119	0.0018	0.62641	720.1	7.8	725	10	709	28	725	10	0.680461	Single Age
13WPY05_39	19.3	0.921	1.491	0.044	0.1495	0.0038	0.6524	928	18	900	22	979	49	900	22	3.01724	Single Age
13WPY05_40	295	1.604	0.815	0.01	0.0995	0.0012	0.76469	604.8	5.7	611.5	7.3	587	19	611.5	7.3	1.1078	Single Age
13WPY05_41	211	73.4	0.3503	0.0097	0.04809	0.00089	0.61767	304.7	7.3	302.8	5.5	343	69	302.8	5.5	0.623564	Single Age
13WPY05_42	359	1.292	0.807	0.015	0.0966	0.0017	0.88062	599.8	8.7	596	10	606	16	596	10	0.633545	Single Age
13WPY05_43	408	16.4	0.359	0.011	0.0413	0.0015	0.057229	311.5	8.2	261	9.5	652	98	DISC	DISC	16.2119	Rim
13WPY05_43	152.6	1.442	1.378	0.025	0.1365	0.0018	0.67739	879	11	825	10	965	31	825	10	6.14334	Core
13WPY05_44	270	3.35	0.49	0.015	0.0556	0.0015	0.74672	404	10	348.7	9.1	731	53	DISC	DISC	13.6881	Rim
13WPY05_44	102.1	0.761	0.782	0.025	0.0848	0.0022	0.72044	588	13	525	13	801	41	DISC	DISC	10.7143	Core
13WPY05_45	175	0.4097	5.17	0.083	0.3183	0.005	0.84964	1846	14	1781	25	1894	17	1894	17	5.96621	Single Age
13WPY05_46	354	155	0.344	0.016	0.0481	0.0035	0.53265	300	12	303	22	280	150	303	22	1	Rim
13WPY05_46	65.2	0.746	1.187	0.025	0.132	0.0023	0.60628	794	12	799	13	776	40	799	13	0.629723	Core
13WPY05_47	684	4.4	0.4559	0.0093	0.0604	0.0012	0.76756	381.3	6.5	378.2	7.2	407	28	378.2	7.2	0.813008	Rim
13WPY05_47	218.2	1.035	0.703	0.012	0.0881	0.0014	0.50677	540.4	7.1	544.2	8	531	41	544.2	8	0.703183	Core
13WPY05_48	314	8	0.639	0.044	0.0751	0.0045	0.91384	499	28	467	27	634	60	467	27	6.41283	Rim
13WPY05_48	81.2	1.302	1.608	0.036	0.1613	0.0029	0.78955	973	14	964	16	1001	41	964	16	0.924974	Core
13WPY05_49	538	1.571	0.956	0.019	0.1042	0.0018	0.88244	680	10	639	11	822	20	639	11	6.02941	Single Age
13WPY05_50	647	1.46	0.7563	0.0078	0.0912	0.0011	0.70528	571.7	4.5	562.6	6.5	611	21	562.6	6.5	1.59174	Single Age
13WPY05_51	299.2	100	0.356	0.017	0.0494	0.0017	0.13212	309	13	311	11	254	86	311	11	0.647249	Rim
13WPY05_51	400.2	1.47	0.697	0.016	0.0862	0.0017	0.87572	536.6	9.4	533	10	560	24	533	10	0.670891	Core
13WPY05_52	718	3.53	0.579	0.025	0.0555	0.0024	0.77402	462	16	348	15	1025	44	DISC	DISC	24.6753	Single Age
13WPY05_53	576	5.68	0.39	0.013	0.0497	0.0016	0.84877	333.9	9.5	312.8	9.7	464	40	312.8	9.7	6.31926	Rim
13WPY05_53	84.2	0.46	0.84	0.017	0.1008	0.0021	0.73031	618.5	9.6	619	12	586	42	619	12	0.0808407	Core
13WPY05_54	237	48.5	0.374	0.013	0.05	0.0012	0.55762	323	10	314.3	7.1	375	65	314.3	7.1	2.6935	Rim
13WPY05_54	282	1.138	1.254	0.022	0.1332	0.0022	0.75628	824.8	9.8	806	13	895	29	806	13	2.27934	Core
13WPY05_55	490	64	0.302	0.018	0.0413	0.0024	0.74442	268	14	261	15	332	80	261	15	2.61194	Rim
13WPY05_55	440	2.42	0.631	0.0091	0.0758	0.0011	0.72519	496.5	5.7	471.1	6.9	576	23	471.1	6.9	5.11581	Core
13WPY05_56	651	39.6	0.364	0.014	0.0442	0.0012	0.95718	316	11	278.6	7.7	581	34	DISC	DISC	11.8354	Single Age
13WPY05_57	244	74	0.3602	0.0074	0.04978	0.00085	0.46716	312.1	5.5	313.2	5.2	327	44	313.2	5.2	0.352451	Single Age
13WPY05_58	913	9.2	0.409	0.024	0.0546	0.0031	0.96219	348	17	342	19	377	34	342	19	1.72414	Rim
13WPY05_58	246	1.028	0.893	0.013	0.1073	0.0016	0.85723	647.8	7.2	657	9.2	609	23	657	9.2	1.42019	Core
13WPY05_59	387	44.7	0.3724	0.008	0.05024	0.00098	0.66514	322	5.8	316	6	375	33	316	6	1.86335	Single Age
13WPY05_60	25.5	1.127	19.83	0.29	0.6155	0.0086	0.8328	3082	14	3091	34	3068	11	3068	11	0.749674	Single Age
13WPY05_61	165	0.5441	0.913	0.011	0.1071	0.00095	0.44949	658.6	5.7	656.7	5.4	664	24	656.7	5.4	0.288491	Single Age
13WPY05_62	139	1.332	1.362	0.024	0.1346	0.0021	0.6829	872	10	814	12	1011	27	814	12	6.65138	Single Age
13WPY05_63	80	1.416	12.26	0.22	0.4865	0.0095	0.87961	2625	17	2554	41	2669	15	2669	15	4.30873	Single Age
13WPY05_64	317	2.11	0.763	0.013	0.093	0.0014	0.76065	575.5	7.8	573.5	8.4	565	24	573.5	8.4	0.347524	Single Age
13WPY05_65	376.2	7.9	0.436	0.011	0.0575	0.002	0.58669	367.2	7.9	361	12	381	67	361	12	1.68845	Rim
13WPY05_65	137.1	1.829	0.5901	0.0086	0.07446	0.00087	0.39746	470.7	5.5	463	5.2	506	34	463	5.2	1.63586	Core
13WPY05_66	315	2.3	0.534	0.015	0.0684	0.0015	0.71809	434	10	426.6	9.1	485	52	426.6	9.1	1.70507	Rim
13WPY05_66	77.4	0.867	0.776	0.021	0.0959	0.0019	0.65434	582	12	592	10	527	43	592	10	1.71821	Core
13WPY05_67	232	1.561	0.839	0.011	0.1022	0.001	0.58795	618.4	5.8	627.5	5.9	579	23	627.5	5.9	1.47154	Single Age
13WPY05_68	331	86.5	0.3503	0.0046	0.04833	0.00065	0.0088289	304.8	3.4	304.2	4	288	29	304.2	4	0.19685	Single Age
13WPY05_69	605	1.67	0.609	0.042	0.0752	0.0044	0.97642	488	25	467	27	555	36	467	27	4.30328	Rim
13WPY05_69	222.7	1.01	0.9167	0.0086	0.1089	0.0011	0.52085	660.4	4.6	666.3	6.6	641	22	666.3	6.6	0.893398	Core
13WPY05_70	333	3.212	5.795	0.06	0.3433	0.004	0.76574	1945	8.9	1902	19	1989	14	1989	14	4.37406	Single Age
13WPY05_71	475	2.51	0.554	0.017	0.0702	0.0015	0.91232	447	11	437.5	9.1	497	31	437.5	9.1	2.12528	Rim
13WPY05_71	159	1.041	0.778	0.018	0.0958	0.0014	0.59159	584	10	589.5	8	555	38	589.5	8	0.941781	Core
13WPY05_72	1281	17	0.496	0.022	0.0618	0.0031	0.9356	409	15	387	19	516	46	387	19	5.37897	Rim
13WPY05_72	883	14.1	0.797	0.013	0.0925	0.0015	0.82247	594.5	7.2	570.3	8.8	673	18	570.3	8.8	4.07065	Core
13WPY05_73	79	7.3	3.23	0.28	0.0982	0.0024	0.75859	1457	70	604	14	3080	140	DISC	DISC	58.545	Rim
13WPY05_73	441	0.3536	5.69	0.078	0.3353	0.0046	0.59746	1929	12	1864	22	2002	24	2002	24	6.89311	Core
13WPY05_74	231	1.179	0.888	0.013	0.1058	0.0012	0.88214	645	6.7	648.4	6.9	633	22	648.4	6.9	0.527132	Single Age
13WPY05_75	89.4	1.065	10.01	0.11	0.4597	0.0054	0.85769	2435	10	2438	24	2438	11	2438	11	0	Single Age
13WPY05_76	1290	83	0.2916	0.0059	0.03938	0.00068	0.92338	260.6	4.4	249	4.2	338	20	249	4.2	4.45127	Rim
13WPY05_76	77.5	0.871	0.904	0.031	0.1053	0.0032	0.52108	653	16	645	19	685	61	645	19	1.22511	Core
13WPY05_77	175.6	0.553	1.576	0.019	0.1611	0.0017	0.67479	960.3	7.5	962.8	9.4	959	18	962.8	9.4	0.260335	Single Age
13WPY05_78	682	7.83	3.056	0.059	0.1918	0.0035	0.8117	1423	14	1131	19	1914	18	DISC	DISC	20.52	Single Age
13WPY05_79	583	2.063	0.67	0.01	0.0839	0.0011	0.79976	520	6.3	519.3	6.3	532	20	519.3	6.3	0.134615	Single Age
13WPY05_80	197.3	0.74	0.5396	0.009	0.06783	0.00099	0.57865	437.9	5.9	423	6	482	34	423	6	3.4026	Single Age
13WPY05_81	222	25.7	0.362	0.016	0.0489	0.002	0.91875	312	12	309	13	328	38	309	13	0.961538	Rim
13WPY05_81	72.1	0.848	0.723	0.032	0.0871	0.0037	0.56255	559	22	538	22	610	89	538	22	3.75671	Core
13WPY05_82	860	70	0.301	0.0085	0.03948	0.00093	0.78918	268.2	6.9	249.6	5.7	390	39	249.6	5.7	6.93512	Single Age
13WPY05_83	739	2.85	0.536	0.018	0.0683	0.0021	0.79359	436	12	426	13	520	46	426	13	2.29358	Rim
13WPY05_83	443	1.328	0.6771	0.0082	0.08452	0.00083	0.70779	524.8	5	523	4.9	537	21	523	4.9	0.342988	Core
13WPY05_84	425	0.0301	0.595	0.011	0.0731	0.0014	0.74156	473.5	7.1	455	8.4	547	26	455	8.4	3.90707	Single Age
13WPY05_85	91.3	0.988	0.757	0.012	0.0942	0.0012	0.50782	572.1	7.1	580.5	7.3	543	39	580.5	7.3	1.46827	Single Age
13WPY05_86	425	76	0.3117	0.0099	0.0421	0.0011	0.8829	275.1	7.7	265.8	6.6	323	34	265.8	6.6	3.38059	Rim
13WPY05_86	290	2.05	0.486	0.016	0.0608	0.002	0.87546	402	11	381	12	512	46	381	12	5.22388	Core
13WPY05_87	67.9	0.983	5.52	0.14	0.3358	0.009	0.85264	1901	22	1865	43	1946	29	1946	29	4.16238	Single Age
13WPY05_88	271	0.951	0.795	0.015	0.097	0.0018	0.87303	593.6	8.8	597	11	594	21	597	11	0.572776	Single Age
13WPY05_89	276	34	0.413	0.029	0.0513	0.0022	0.93592	349	21	323	14	508	73	323	14	7.44986	Rim
13WPY05_89	55	0.671	3.962	0.088	0.2635	0.0055	0.70594	1629	17	1507	28	1752	30	1752	30	13.984	Core
13WPY05_91	265.3	106.4	0.3626	0.0096	0.0495	0.0012	0.89224	314	7.1	311.2	7.2	356	43	311.2	7.2	0.89172	Rim
13WPY05_91	132.3	22.6	2.37	0.15	0.1593	0.0093	0.98548	1226	47	951	52	1769	21	DISC	DISC	22.4307	Core
13WPY05_92	287.5	0.867	0.827	0.01	0.0989	0.0012	0.48869	611.6	5.8	608.1	6.9	618	29	608.1	6.9	0.572269	Single Age
13WPY05_93	234	0.987	0.916	0.011	0.109	0.0014	0.71427	659.9	6	666.8	7.9	632	21	666.8	7.9	1.04561	Single Age
13WPY05_94	140.1	0.3679	1.27	0.015	0.1363	0.002	0.68735	832.1	6.9	824	11	852	22	824	11	0.973441	Single Age
13WPY05_95	356	1.486	0.744	0.013	0.0884	0.0015	0.84195	565.6	8	546.3	8.8	627	21	546.3	8.8	3.41231	Single Age
13WPY05_96	332	7.73	0.409	0.011	0.056	0.0015	0.87889	347.6	8	351.4	9.1	334	39	351.4	9.1	1.09321	Rim
13WPY05_96	33.7	1.117	0.686	0.022	0.085	0.0026	0.54177	530	13	526	16	555	74	526	16	0.754717	Core
13WPY05_97	410	8.48	0.376	0.013	0.0505	0.0011	0.34582	324	9.4	317.3	7	384	53	317.3	7	2.0679	Rim
13WPY05_97	237	1.222	0.784	0.017	0.0905	0.0018	0.48538	587.2	9.8	558	10	651	46	558	10	4.97275	Core
13WPY05_98	71.5	0.373	1.148	0.019	0.1274	0.0021	0.69138	777.1	9.5	773	12	781	30	773	12	0.527603	Single Age
13WPY05_100	760	32.6	0.533	0.043	0.063	0.0036	0.94978	433	28	394	22	660	62	394	22	9.00693	Rim
13WPY05_100	38.99	1.563	10.9	0.2	0.4645	0.009	0.49074	2514	17	2459	40	2543	33	2543	33	3.30319	Core
13WPY05_101	788	14.6	1.771	0.076	0.1263	0.0029	0.94859	1034	28	767	17	1688	27	DISC	DISC	25.8221	Rim
13WPY05_101	247	0.938	11.77	0.11	0.4756	0.0059	0.75327	2585.9	8.4	2508	26	2637	13	2637	13	4.89192	Core
13WPY05_102	613	17.31	0.7	0.014	0.0856	0.0017	0.88183	539.4	8.3	531	10	571	20	531	10	1.55729	Single Age
13WPY05_103	124.1	0.789	4.59	0.12	0.274	0.0063	0.9225	1748	22	1560	32	1985	17	1985	17	21.4106	Single Age
13WPY05_105	380	9	0.588	0.044	0.0745	0.0044	0.85981	466	29	463	27	496	57	463	27	0.643777	Rim
13WPY05_105	154.4	0.715	2.04	0.043	0.1933	0.0036	0.72945	1128	14	1139	19	1120	30	1139	19	0.975177	Core
13WPY05_106	389.9	9.62	4.29	0.27	0.21	0.0098	0.97602	1674	51	1226	52	2285	28	DISC	DISC	46.3457	Single Age
13WPY05_107	403	6.36	0.3892	0.0056	0.05242	0.00074	0.61637	333.7	4.1	329.3	4.5	373	30	329.3	4.5	1.31855	Rim
13WPY05_107	20	0.3083	0.838	0.043	0.1007	0.0041	0.27774	617	23	618	24	610	110	618	24	0.162075	Core
13WPY05_108	354	1.268	6.17	0.11	0.2893	0.0057	0.91053	1999	16	1637	29	2393	15	DISC	DISC	31.5921	Single Age
13WPY05_109	532	12.5	0.753	0.01	0.0916	0.0012	0.46037	569.3	6	564.8	6.8	592	23	564.8	6.8	0.790444	Single Age
13WPY05_110	532	9.8	0.89	0.031	0.0991	0.0036	0.95513	646	17	609	21	781	22	609	21	5.72755	Rim
13WPY05_110	367	1.938	1.457	0.022	0.1506	0.0024	0.75543	912.5	9	904	14	948	23	904	14	0.931507	Core
13WPY05_111	920	33	0.343	0.032	0.0455	0.0039	0.93015	298	24	287	24	353	66	287	24	3.69128	Rim
13WPY05_111	150	0.505	0.879	0.015	0.1056	0.0017	0.59506	642.3	8.7	646.8	9.6	639	37	646.8	9.6	0.700607	Core
13WPY05_112	612	2.87	0.624	0.06	0.0762	0.004	0.88685	492	37	474	24	570	110	474	24	3.65854	Rim
13WPY05_112	423	1.428	0.7962	0.0096	0.0987	0.0013	0.61959	594.5	5.4	606.7	7.4	568	23	606.7	7.4	2.05214	Core
13WPY05_113	197	1.281	0.672	0.016	0.0811	0.0016	0.64744	521	9.9	502.7	9.7	583	29	502.7	9.7	3.51248	Single Age
13WPY05_114	69.1	1	0.804	0.017	0.0987	0.0016	0.67377	599.9	9.2	606.6	9.5	604	37	606.6	9.5	1.11685	Single Age
13WPY05_115	249	88.6	0.3578	0.0064	0.04915	0.0008	0.8032	310.4	4.7	309.3	4.9	334	25	309.3	4.9	0.354381	Single Age
13WPY05_116	210.1	2.67	1.466	0.033	0.1524	0.0028	0.87233	915	14	914	16	936	21	914	16	0.10929	Single Age
13WPY05_117	211	0.488	6.57	0.1	0.3676	0.0058	0.95597	2054	14	2017	27	2096	12	2096	12	3.76908	Single Age
13WPY05_118	236	38	0.338	0.021	0.0442	0.0022	0.9386	294	16	279	14	382	45	279	14	5.10204	Rim
13WPY05_118	120.1	0.612	0.73	0.022	0.0877	0.0016	0.68588	556	13	542	9.6	574	43	542	9.6	2.51799	Core
13WPY05_119	402	21	0.325	0.012	0.0421	0.0014	0.62414	285.7	8.8	265.9	8.4	360	55	265.9	8.4	6.93035	Rim
13WPY05_119	347	1.421	0.892	0.011	0.1075	0.0013	0.61946	647.2	5.8	658.1	7.6	608	25	658.1	7.6	1.68418	Core
13WPY05_120	660	23.6	0.388	0.022	0.0526	0.0028	0.91259	333	16	330	17	409	59	330	17	0.900901	Rim
13WPY05_120	98	2.02	0.71	0.02	0.0873	0.0021	0.79395	544	12	539	12	561	39	539	12	0.919118	Core
13WPY05_121	430	14.2	1	0.16	0.088	0.015	0.78284	699	85	544	89	1250	210	DISC	DISC	22.1745	Rim
13WPY05_121	120.2	0.996	13.16	0.14	0.5206	0.0048	0.72456	2691	10	2701	20	2684	13	2684	13	0.633383	Core
13WPY05_122	518	117	0.303	0.0054	0.04138	0.00074	0.82974	268.6	4.2	261.3	4.6	301	23	261.3	4.6	2.7178	Single Age
13WPY05_123	334	20	0.482	0.065	0.0623	0.005	0.90605	398	44	390	30	430	140	390	30	2.01005	Rim
13WPY05_123	158.7	1.572	1.146	0.018	0.1312	0.0018	0.6962	775	8.6	794	10	746	20	794	10	2.45161	Core
13WPY05_124	127.4	1.491	0.936	0.013	0.1112	0.0011	0.39358	671.4	6.6	679.9	6.7	660	29	679.9	6.7	1.26601	Single Age
13WPY07_1	1017	5.44	0.516	0.012	0.0637	0.0014	0.93219	421.9	8.3	397.9	8.4	547	20	397.9	8.4	5.68855	Single Age
13WPY07_6	548	15.98	0.366	0.01	0.0483	0.001	0.87813	316	7.7	304	6.3	400	29	304	6.3	3.79747	Single Age
13WPY07_7	610	32.2	0.3121	0.0088	0.0418	0.0011	0.90227	275.6	6.8	263.9	7	338	28	263.9	7	4.24528	Rim
13WPY07_7	39.3	2.09	0.813	0.027	0.106	0.0042	0.67141	605	16	649	25	434	70	649	25	7.27273	Core
13WPY07_9	351	5.28	0.514	0.012	0.0645	0.0013	0.89194	420.9	8	403	7.7	516	26	403	7.7	4.25279	Rim
13WPY07_9	126.4	1.674	0.779	0.019	0.094	0.0016	0.64227	584	11	578.8	9.4	593	42	578.8	9.4	0.890411	Core
13WPY07_10	370	21.6	0.3362	0.0082	0.04629	0.00095	0.86367	293.9	6.2	291.7	5.8	317	24	291.7	5.8	0.748554	Single Age
13WPY07_11	511	5.13	2.931	0.071	0.141	0.0027	0.90085	1388	19	850	15	2350	18	DISC	DISC	38.7608	Single Age
13WPY07_12	188	19.1	0.3326	0.0088	0.0453	0.00074	0.39364	291.4	6.7	285.6	4.6	344	62	285.6	4.6	1.99039	Rim
13WPY07_12	554	17.74	0.625	0.017	0.0736	0.002	0.84055	493	11	457	12	669	31	457	12	7.30223	Core
13WPY07_13	600	6.67	1.01	0.035	0.1021	0.0032	0.96889	706	18	626	19	982	16	DISC	DISC	11.3314	Single Age
13WPY07_14	245	3.16	2.156	0.04	0.1523	0.0026	0.86059	1166	13	914	14	1678	16	DISC	DISC	21.6123	Single Age
13WPY07_15	350	16.13	0.3481	0.0044	0.04783	0.0004	0.46872	303.2	3.3	301.2	2.5	323	29	301.2	2.5	0.659631	Single Age
13WPY07_16	213.4	5.6	0.999	0.029	0.0738	0.001	0.57583	702	15	459	6	1578	42	DISC	DISC	34.6154	Single Age
13WPY07_17	82.9	0.718	1.777	0.075	0.1364	0.0048	0.92851	1039	27	824	27	1537	29	DISC	DISC	20.693	Single Age
13WPY07_18	603	13.75	0.3847	0.0079	0.05075	0.00094	0.85755	330.9	5.7	319.1	5.8	421	21	319.1	5.8	3.56603	Single Age
13WPY07_19	440	5.68	0.847	0.01	0.1003	0.0014	0.80395	622.5	5.5	615.9	8.1	647	17	615.9	8.1	1.06024	Single Age
13WPY07_20	279	4.54	0.509	0.017	0.0603	0.0021	0.69838	418	11	378	13	598	53	378	13	9.56938	Rim
13WPY07_20	557	1.406	0.893	0.011	0.096	0.0011	0.83567	647.8	5.7	591	6.5	825	14	591	6.5	8.76814	Core
13WPY07_21	572	2.57	0.5619	0.0091	0.0702	0.0011	0.84682	452.4	5.9	437.2	6.6	526	19	437.2	6.6	3.35986	Single Age
13WPY07_22	243	24.4	0.379	0.013	0.0507	0.00067	0.1873	325.9	9.5	318.8	4.1	391	69	318.8	4.1	2.17858	Rim
13WPY07_22	357	2.84	0.684	0.028	0.0862	0.003	0.93012	528	17	533	18	499	33	533	18	0.94697	Core
13WPY07_23	255	1.652	0.69	0.015	0.0765	0.0013	0.76728	534.6	9.6	474.9	7.8	786	23	DISC	DISC	11.1672	Single Age
13WPY07_24	688	14.5	0.3491	0.0065	0.04654	0.00057	0.64268	303.8	4.9	293.3	3.5	397	30	293.3	3.5	3.45622	Single Age
13WPY07_25	239	19.72	0.368	0.008	0.05062	0.00093	0.40551	318	6	318.3	5.7	303	42	318.3	5.7	0.0943396	Single Age
13WPY07_26	310	8.5	0.522	0.01	0.05321	0.00058	0.65469	426	7	334.2	3.6	972	31	DISC	DISC	21.5493	Single Age
13WPY07_27	127	1.017	1.294	0.023	0.134	0.0023	0.76014	843	10	810	13	945	23	810	13	3.91459	Single Age
13WPY07_28	346	8.9	0.375	0.016	0.0486	0.0018	0.67624	322	12	306	11	407	35	306	11	4.96894	Single Age
13WPY07_29	530	11.5	0.42	0.022	0.053	0.002	0.94613	356	16	333	13	501	42	333	13	6.46067	Rim
13WPY07_29	246.3	2.08	0.821	0.028	0.0894	0.0024	0.85543	607	16	552	14	815	30	552	14	9.06096	Core
13WPY07_30	409	12.2	0.3425	0.0064	0.04664	0.0008	0.64377	299	4.9	293.8	5	328	31	293.8	5	1.73913	Rim
13WPY07_30	130	2.64	0.46	0.012	0.0618	0.0015	0.68326	385.8	9.1	386.3	8.9	386	54	386.3	8.9	0.129601	Core
13WPY07_31	293	1.939	1.214	0.062	0.1147	0.0033	0.89789	803	28	700	19	1104	53	DISC	DISC	12.8269	Single Age
13WPY07_32	337	20.24	0.3652	0.0061	0.04745	0.00054	0.29091	315.9	4.5	298.8	3.3	446	40	298.8	3.3	5.41311	Single Age
13WPY07_33	443	0.873	0.697	0.012	0.08633	0.00089	0.63409	539.3	5.6	533.8	5.3	574	20	533.8	5.3	1.01984	Single Age
13WPY07_34	476	12.85	0.3469	0.0046	0.04749	0.00056	0.65573	302.3	3.5	299.1	3.4	328	23	299.1	3.4	1.05855	Single Age
13WPY07_35	198.6	0.629	2.82	0.049	0.1998	0.0032	0.92538	1359	13	1174	17	1683	13	DISC	DISC	13.613	Single Age
13WPY07_36	295	9.1	0.447	0.011	0.0579	0.0013	0.36109	374.8	7.8	363	7.9	437	56	363	7.9	3.14835	Rim
13WPY07_36	465.2	2.41	0.5766	0.0095	0.0716	0.0011	0.71969	462.1	6.1	445.5	6.5	549	22	445.5	6.5	3.5923	Core
13WPY07_37	740	16.86	0.3169	0.0077	0.04196	0.00079	0.65172	279.3	5.9	265	4.9	353	43	265	4.9	5.11994	Rim
13WPY07_37	307	6.3	0.656	0.036	0.0645	0.0018	0.90329	511	22	403	11	1002	60	DISC	DISC	21.135	Core
13WPY07_38	610	10	0.44	0.015	0.0552	0.0016	0.078081	370	11	346.4	9.8	474	72	346.4	9.8	6.37838	Rim
13WPY07_38	639	1.383	0.6028	0.0086	0.0747	0.0011	0.78612	478.9	5.4	464.4	6.9	514	24	464.4	6.9	3.02777	Core
13WPY07_39	1354	17.4	0.579	0.02	0.0708	0.0019	0.80872	463	13	441	11	595	54	441	11	4.75162	Rim
13WPY07_39	256.3	0.868	5.708	0.058	0.3141	0.0024	0.78374	1934.1	8.4	1761	12	2113	12	2113	12	16.6588	Core
13WPY07_40	904	2.71	0.53	0.014	0.0658	0.0016	0.94437	430.9	9.5	410.6	9.5	507	16	410.6	9.5	4.71107	Single Age
13WPY07_41	259.4	2.93	1.751	0.056	0.0998	0.0022	0.84796	1025	21	613	13	2060	30	DISC	DISC	40.1951	Single Age
13WPY07_42	324	2.13	0.58	0.012	0.0717	0.0012	0.8501	465.2	8	446.6	7.4	541	24	446.6	7.4	3.99828	Single Age
13WPY07_43	286.2	22.39	0.3172	0.0064	0.04384	0.00053	0.26026	279.6	4.9	276.6	3.3	310	44	276.6	3.3	1.07296	Single Age
13WPY07_44	691	2.67	4.49	0.1	0.2215	0.0028	0.85046	1727	19	1290	15	2327	22	DISC	DISC	44.5638	Single Age
13WPY07_45	219.6	20.43	0.3211	0.0065	0.04424	0.00073	0.76064	282.5	5	279	4.5	338	33	279	4.5	1.23894	Single Age
13WPY07_46	610	21.4	0.389	0.021	0.04727	0.00098	0.8203	332	15	297.7	6.1	579	79	DISC	DISC	10.3313	Single Age
13WPY07_47	294	3.73	0.79	0.031	0.0859	0.0028	0.61985	589	18	531	17	840	23	531	17	9.8472	Single Age
13WPY07_49	255.8	22.06	0.324	0.017	0.04463	0.00088	0.090801	285	13	281.4	5.4	290	110	281.4	5.4	1.26316	Rim
13WPY07_49	204	2.42	0.852	0.015	0.1004	0.0014	0.69587	627.3	7.7	616.6	8.4	669	30	616.6	8.4	1.70572	Core
13WPY07_50	517	13.2	0.372	0.012	0.049	0.0011	0.83471	320.8	8.5	310	7.2	387	33	310	7.2	3.36658	Single Age
13WPY07_51	1290	11.33	0.423	0.013	0.0537	0.0018	0.93526	358.2	9.1	337	11	505	21	337	11	5.91848	Rim
13WPY07_51	416	4.26	0.774	0.028	0.0927	0.0026	0.9578	581	16	571	16	624	23	571	16	1.72117	Core
13WPY07_52	112	1.115	1.615	0.018	0.1621	0.0018	0.67753	975.8	7	968	10	992	21	968	10	0.799344	Single Age
13WPY07_53	75.6	0.8955	0.951	0.014	0.1101	0.0017	0.23691	679.2	7.2	673	10	723	38	673	10	0.912839	Single Age
13WPY07_55	301	0.59	1.145	0.031	0.1169	0.002	0.64521	774	14	712	12	974	40	712	12	8.01034	Rim
13WPY07_55	198.6	0.374	1.482	0.021	0.1485	0.0021	0.43854	924.8	9.2	893	12	982	33	893	12	3.43858	Core
13WPY07_56	920	31.5	0.2962	0.0099	0.0394	0.0012	0.89885	263.3	7.7	249.3	7.3	353	31	249.3	7.3	5.31713	Rim
13WPY07_56	378	5.315	0.769	0.013	0.0897	0.0012	0.79675	579.1	7.6	553.9	7.1	634	23	553.9	7.1	4.35158	Core
13WPY07_57	360.7	1.2	0.945	0.016	0.107	0.002	0.79059	675.2	8.6	655	12	760	22	655	12	2.99171	Single Age
13WPY07_58	364.3	1.506	5.99	0.26	0.314	0.014	0.97937	1965	39	1766	66	2176	16	2176	16	18.8419	Single Age
13WPY07_59	394	17	0.375	0.012	0.0498	0.0014	0.91172	323	8.7	313.3	8.8	436	25	313.3	8.8	3.0031	Single Age
13WPY07_61	1380	33.2	0.3871	0.0036	0.05088	0.00053	0.56326	332.2	2.7	319.9	3.3	405	20	319.9	3.3	3.70259	Single Age
13WPY07_63	432	18.9	0.3353	0.0094	0.0459	0.0011	0.90534	293.4	7.1	289.1	6.6	336	27	289.1	6.6	1.46558	Single Age
13WPY07_64	448.4	1.762	3.895	0.081	0.1705	0.0025	0.92674	1611	17	1015	14	2510	17	DISC	DISC	36.9957	Single Age
13WPY07_65	757	4.32	0.442	0.012	0.0556	0.0012	0.86895	370.8	8.2	348.7	7.6	502	30	348.7	7.6	5.96009	Single Age
13WPY07_66	284.5	22.71	0.331	0.012	0.04493	0.00085	0.048032	289.8	9.3	283.3	5.3	336	77	283.3	5.3	2.24293	Rim
13WPY07_66	415.4	4.03	2.399	0.095	0.1287	0.0042	0.97173	1238	28	780	24	2161	19	DISC	DISC	36.9952	Core
13WPY07_67	1017	5.87	0.328	0.0033	0.04411	0.00044	0.55953	288	2.5	278.2	2.7	366	20	278.2	2.7	3.40278	Single Age
13WPY07_68	254	22.12	0.3356	0.0066	0.04562	0.00063	0.24713	293.7	5	287.6	3.9	339	49	287.6	3.9	2.07695	Single Age
13WPY07_69	482	19.9	0.3347	0.0095	0.04518	0.00095	0.86092	292.7	7.2	284.8	5.8	371	30	284.8	5.8	2.69901	Single Age
13WPY07_70	838	54.1	0.2976	0.0034	0.04165	0.00035	0.51425	264.4	2.7	263.1	2.1	269	23	263.1	2.1	0.491679	Single Age
13WPY07_71	238.5	1.142	1.299	0.017	0.1315	0.0014	0.8147	844.8	7.4	796.5	8.2	976	17	796.5	8.2	5.71733	Single Age
13WPY07_72	580	32.1	0.3057	0.0068	0.0408	0.00089	0.27413	270.7	5.3	257.8	5.5	330	45	257.8	5.5	4.76542	Single Age
13WPY07_73	650	24.9	0.3163	0.0048	0.04374	0.00053	0.262	279	3.7	276	3.3	321	36	276	3.3	1.07527	Single Age
13WPY07_74	710	0.635	0.5499	0.0085	0.06903	0.00099	0.8708	444.6	5.6	430.3	6	524	16	430.3	6	3.21637	Single Age
13WPY07_76	804	6.56	0.4	0.02	0.0521	0.0022	0.95637	341	14	327	13	402	29	327	13	4.10557	Single Age
13WPY07_77	950	27.5	0.374	0.012	0.048	0.0015	0.91971	322.3	9	302.3	9.1	447	31	302.3	9.1	6.2054	Single Age
13WPY07_78	430	17.5	0.376	0.016	0.0482	0.0014	0.85253	323	12	303.3	8.3	462	43	303.3	8.3	6.09907	Single Age
13WPY07_79	376	16	0.344	0.0074	0.04573	0.00071	0.39006	300	5.6	288.2	4.4	379	36	288.2	4.4	3.93333	Single Age
13WPY07_80	553	8.74	0.744	0.016	0.0734	0.0011	0.77509	564.5	9.7	456.4	6.8	1016	31	DISC	DISC	19.1497	Single Age
13WPY07_81	257	88.8	1.099	0.019	0.1226	0.0016	0.56267	752.8	9.2	745.4	9.5	798	33	745.4	9.5	0.982997	Rim
13WPY07_81	67.6	23.62	2.554	0.041	0.1802	0.003	0.71569	1287	12	1068	16	1673	25	DISC	DISC	17.0163	Core
13WPY07_83	466	15.64	0.3804	0.0098	0.0512	0.0011	0.93538	326.9	7.3	321.5	6.6	365	22	321.5	6.6	1.65188	Single Age
13WPY07_84	381	25.4	0.337	0.01	0.0459	0.0012	0.24787	294.5	7.6	289.6	7.4	319	53	289.6	7.4	1.66384	Single Age
13WPY07_85	108.8	1.35	0.682	0.02	0.0847	0.0022	0.81585	527	12	524	13	539	37	524	13	0.56926	Single Age
13WPY07_86	530	0.84	5.76	0.15	0.304	0.0062	0.94396	1938	23	1716	32	2186	16	2186	16	21.5005	Single Age
13WPY07_87	650	34.4	0.5393	0.007	0.06599	0.00097	0.76611	438.4	4.7	411.9	5.9	576	22	411.9	5.9	6.04471	Single Age
13WPY07_88	370	20.4	0.3234	0.0033	0.04514	0.00036	0.31356	284.5	2.5	284.6	2.2	291	26	284.6	2.2	0.0351494	Single Age
13WPY07_89	266	1.249	0.609	0.011	0.0783	0.0015	0.85602	482.7	6.9	485.6	8.7	502	23	485.6	8.7	0.600787	Single Age
13WPY07_91	389	10.9	0.422	0.019	0.0502	0.0011	0.8588	358	13	315.7	6.7	639	58	DISC	DISC	11.8156	Single Age
13WPY07_92	154.4	2.303	1.041	0.016	0.1161	0.0019	0.75219	724.3	8	708	11	766	25	708	11	2.25045	Single Age
13WPY07_93	442	17.7	0.3381	0.005	0.0464	0.00065	0.5566	295.7	3.8	292.4	4	336	31	292.4	4	1.116	Single Age
13WPY07_94	983	10.1	0.346	0.018	0.0445	0.0018	0.94197	301	13	283	12	410	40	283	12	5.98007	Rim
13WPY07_94	505	1.404	0.583	0.012	0.0705	0.001	0.8461	467	7.8	439.2	6	588	24	439.2	6	5.95289	Core
13WPY07_95	271	0.891	0.8157	0.0081	0.09835	0.00095	0.70361	605.5	4.5	604.7	5.5	624	17	604.7	5.5	0.132122	Single Age
13WPY07_96	521	9	0.364	0.011	0.0487	0.0013	0.84668	315	8.1	306.6	7.8	376	35	306.6	7.8	2.66667	Rim
13WPY07_96	255	4.05	0.511	0.013	0.0676	0.0013	0.68619	418.8	8.8	421.7	7.6	427	39	421.7	7.6	0.692455	Core
13WPY07_97	281	27.7	0.3196	0.0082	0.04445	0.00076	0.25573	281.5	6.3	280.4	4.7	279	65	280.4	4.7	0.390764	Rim
13WPY07_97	415	6.41	1.894	0.059	0.1294	0.0036	0.92381	1077	21	784	21	1726	22	DISC	DISC	27.2052	Core
13WPY07_98	201	0.598	0.6393	0.0099	0.07939	0.00074	0.45947	501.6	6.1	492.5	4.4	538	30	492.5	4.4	1.81419	Single Age
13WPY07_100	510	20.4	0.3063	0.0069	0.0408	0.0011	0.27255	271.3	5.4	257.9	6.9	371	68	257.9	6.9	4.93918	Single Age
13WPY07_102	424	15	0.389	0.013	0.04806	0.00093	0.82901	333.1	9.2	302.6	5.7	568	38	302.6	5.7	9.15641	Single Age
13WPY07_103	370	1.63	1.676	0.017	0.1536	0.0017	0.7667	999.3	6.5	923	10	1170	15	923	10	7.63534	Single Age
13WPY07_104	617	5.77	0.371	0.014	0.0469	0.0014	0.96048	320	10	295.2	8.4	473	22	295.2	8.4	7.75	Single Age
13WPY07_105	282	17.74	0.306	0.0044	0.0422	0.00046	0.59483	271	3.4	266.4	2.8	315	32	266.4	2.8	1.69742	Single Age
13WPY07_106	289	17	0.3052	0.0081	0.04219	0.0006	0.54335	270.2	6.2	266.4	3.7	305	47	266.4	3.7	1.40637	Single Age
13WPY07_107	197	16.64	0.344	0.0073	0.04587	0.00063	0.092979	300	5.5	289.1	3.9	372	50	289.1	3.9	3.63333	Single Age
13WPY07_108	392	20	0.429	0.024	0.055	0.0022	0.96723	361	17	345	13	456	44	345	13	4.43213	Single Age
13WPY07_109	523	4.79	0.4067	0.0076	0.04943	0.00068	0.74843	346.3	5.5	311	4.2	590	24	DISC	DISC	10.1935	Single Age
13WPY07_110	394	7.1	0.646	0.029	0.0669	0.0022	0.73302	504	18	417	13	942	45	DISC	DISC	17.2619	Single Age
13WPY07_111	579	6.5	1.412	0.048	0.0912	0.0029	0.94242	896	21	566	16	1845	26	DISC	DISC	36.8304	Single Age
13WPY07_112	195.3	17.9	0.3137	0.0058	0.04277	0.00045	0.20682	276.9	4.5	270	2.8	364	43	270	2.8	2.49187	Single Age
13WPY07_113	481	15.39	0.3094	0.0042	0.04147	0.0004	0.58384	273.7	3.2	261.9	2.5	344	24	261.9	2.5	4.31129	Single Age
13WPY07_114	237.4	22.26	0.3192	0.0046	0.0438	0.00047	0.74382	282	3.9	276.3	2.9	323	34	276.3	2.9	2.02128	Single Age
13WPY07_115	461	16.5	0.354	0.015	0.04396	0.00068	0.66521	307	11	277.3	4.2	546	66	277.3	4.2	9.67427	Single Age
13WPY07_116	379	22.5	0.3326	0.0093	0.04576	0.00086	0.50385	291.5	7.1	288.5	5.3	329	50	288.5	5.3	1.02916	Rim
13WPY07_116	120.2	1.081	1.068	0.018	0.1185	0.0014	0.64449	738.9	8.9	721.9	8.2	801	28	721.9	8.2	2.30072	Core
13WPY07_117	620	18.3	0.3311	0.0073	0.04451	0.00065	0.67014	290.3	5.6	280.7	4	405	35	280.7	4	3.30692	Single Age
13WPY07_118	357	1.558	1.437	0.04	0.1434	0.0039	0.95555	902	17	863	22	993	17	863	22	4.32373	Single Age
13WPY07_119	449	8.97	0.51	0.015	0.05407	0.00067	0.79142	418	10	339.4	4.1	850	47	DISC	DISC	18.8038	Single Age
13WPY07_120	308	2.88	0.708	0.011	0.0806	0.0011	0.80987	543.4	6.5	499.5	6.6	722	19	499.5	6.6	8.07876	Single Age
13WPY07_121	215.3	0.948	0.704	0.016	0.0818	0.001	0.40023	540.4	9.6	506.8	6.1	685	45	506.8	6.1	6.21762	Single Age
13WPY07_122	308	8.3	0.376	0.023	0.0521	0.0039	0.52349	324	17	327	24	353	87	327	24	0.925926	Rim
13WPY07_122	106.1	2.21	0.792	0.014	0.0939	0.0015	0.66254	592	7.9	578.5	8.6	632	31	578.5	8.6	2.28041	Core
13WPY07_123	243	21.8	0.3232	0.0041	0.04458	0.0004	0.08412	284.3	3.1	281.1	2.5	304	33	281.1	2.5	1.12557	Single Age
13WPY07_124	404	24.3	0.335	0.011	0.04541	0.00085	0.77298	293.1	8.3	286.3	5.3	360	85	286.3	5.3	2.32003	Rim
13WPY07_124	130.4	1.817	9.78	0.11	0.3936	0.0042	0.46874	2414	10	2139	20	2645	20	2645	20	19.1304	Core
13WPY07_125	151.9	0.556	0.779	0.01	0.0936	0.0011	0.53703	585.5	5.8	576.9	6.6	609	24	576.9	6.6	1.46883	Single Age

## Sheet: U-Pb Ordovician
Ordovician unit zircon U-Pb data
Sample_Grain #	[U] ppm	U/Th	207/235	2σ error	206/238	2σ error	RHO	207/235 Age (Ma)	2σ error	206/238 Age (Ma)	2σ error	207/206 Age (Ma)	2σ error	Best age (Ma)	2σ error	% Discordance*	Rim/Core
12WPY05_1	284	0.993	0.8839	0.0083	0.1052	0.0011	0.77356	642.9	4.5	645	6.2	644	15	645	6.2	0.326645	Single Age
12WPY05_2	169.3	0.4946	6.294	0.04	0.3617	0.0028	0.58157	2017.3	5.6	1990	13	2050	11	2050	11	2.92683	Single Age
12WPY05_3	368.5	1.128	1.839	0.082	0.1403	0.004	0.92483	1052	29	845	23	1521	37	DISC	DISC	19.6768	Single Age
12WPY05_4	96	1	9.16	0.13	0.3934	0.0057	0.8472	2355	14	2137	26	2568	14	2568	14	16.7835	Single Age
12WPY05_5	733	1.679	0.6785	0.0045	0.08442	0.00067	0.5149	525.8	2.7	522.4	4	554	16	522.4	4	0.646634	Single Age
12WPY05_6	482	4.2	10.45	0.23	0.4664	0.0064	0.87717	2477	20	2470	28	2484	21	2484	21	0.563607	Single Age
12WPY05_8	227.6	1.132	1.279	0.017	0.1351	0.0021	0.81936	836.9	7.8	817	12	894	18	817	12	2.37782	Single Age
12WPY05_9	279.9	0.803	7.03	0.1	0.378	0.0055	0.9211	2117	13	2072	26	2160.3	9.2	2160.3	9.2	4.0874	Single Age
12WPY05_10	218	2.8	8.61	0.12	0.4243	0.0064	0.85814	2298	12	2279	29	2320	11	2320	11	1.76724	Single Age
12WPY05_11	622	31	0.92	0.018	0.1081	0.0029	0.81075	662.1	9.8	662	17	680	26	662	17	0.0151035	Rim
12WPY05_11	692	4.59	2.418	0.097	0.1841	0.0058	0.97185	1243	29	1088	32	1532	21	DISC	DISC	12.4698	Core
12WPY05_12	419.1	6.74	0.7531	0.0074	0.0918	0.001	0.79949	570.4	4.4	566	6.1	598	14	566	6.1	0.771388	Single Age
12WPY05_13	114.8	0.4629	0.8614	0.0095	0.10323	0.00096	0.41165	630.7	5.1	633.3	5.6	631	21	633.3	5.6	0.41224	Single Age
12WPY05_14	243.7	1.583	11.74	0.12	0.4726	0.0053	0.78101	2584.6	9.9	2494	23	2664	12	2664	12	6.38138	Single Age
12WPY05_15	745	11.3	0.855	0.012	0.0995	0.0011	0.65961	626.7	6.7	611.1	6.4	685	22	611.1	6.4	2.48923	Single Age
12WPY05_16	39.1	1.223	1.739	0.031	0.1718	0.0025	0.29151	1022	11	1022	14	1000	29	1022	14	0	Single Age
12WPY05_17	133.8	0.664	0.911	0.0076	0.10646	0.00084	0.38878	657.4	4	652.1	4.9	666	19	652.1	4.9	0.806206	Single Age
12WPY05_18	387	27.5	0.699	0.011	0.0853	0.0013	0.421	537.8	6.7	527.6	7.6	555	24	527.6	7.6	1.89662	Single Age
12WPY05_45	103.6	1.018	1.011	0.013	0.117	0.0017	0.80433	709.1	6.7	713.4	9.6	717	17	713.4	9.6	0.606402	Single Age
12WPY05_46	1052	134.8	0.855	0.007	0.10051	0.00082	0.6367	627.3	3.8	617.4	4.8	664	15	617.4	4.8	1.57819	Rim
12WPY05_46	670	20.4	1.452	0.018	0.1261	0.0014	0.44571	910.4	7.4	765.5	7.8	1268	25	DISC	DISC	15.9161	Core
12WPY05_47	81.5	1.27	1.793	0.019	0.1772	0.0016	0.67339	1042.5	6.9	1051.3	9	1025	19	1051.3	9	0.844125	Single Age
12WPY05_48	435.1	0.928	0.7816	0.0096	0.0928	0.001	0.3324	586.1	5.5	572.1	5.9	634	22	572.1	5.9	2.38867	Single Age
12WPY05_49	430	1.08	4.914	0.079	0.3253	0.0056	0.96772	1803	14	1814	27	1772	14	1772	14	2.3702	Single Age
12WPY05_50	257	12.45	0.8414	0.0072	0.10102	0.00094	0.67908	619.8	4	620.3	5.5	624	16	620.3	5.5	0.0806712	Single Age
12WPY05_51	124.7	0.561	0.679	0.01	0.0851	0.0012	0.038538	525.6	6.3	526.6	7.2	527	26	526.6	7.2	0.190259	Single Age
12WPY05_52	29.4	0.782	1.59	0.046	0.1541	0.0039	0.7543	967	18	923	22	1036	34	923	22	4.55016	Single Age
12WPY05_53	238	19.7	0.822	0.049	0.0998	0.0022	0.9656	608	27	613	13	590	100	613	13	0.822368	Rim
12WPY05_53	140	0.71	4.729	0.059	0.2898	0.0039	0.88051	1772	11	1640	20	1935	14	1935	14	15.2455	Core
12WPY05_54	324	5.32	0.9802	0.0077	0.1133	0.001	0.66168	693.5	3.9	692.1	6	703	14	692.1	6	0.201875	Single Age
12WPY05_55	193	2.97	0.935	0.017	0.1085	0.0022	0.74582	670.5	8.9	664	13	684	34	664	13	0.969426	Single Age
12WPY05_56	70.2	0.355	1.597	0.02	0.1597	0.0018	0.42689	968.4	7.8	955	10	990	23	955	10	1.38373	Single Age
12WPY05_57	179	0.632	0.89	0.018	0.1046	0.0021	0.84639	645.3	9.8	641	12	666	24	641	12	0.666357	Single Age
12WPY05_58	94.1	24.2	0.912	0.02	0.1096	0.002	0.23986	658	10	670	11	592	45	670	11	1.82371	Rim
12WPY05_58	112.7	1.97	1.472	0.021	0.1499	0.0023	0.69209	918.4	8.5	900	13	955	26	900	13	2.00348	Core
12WPY05_59	48.7	0.4776	6.443	0.043	0.3628	0.0027	0.62529	2037.8	5.8	1995	13	2079	11	2079	11	4.0404	Single Age
12WPY05_60	84.1	0.564	1.773	0.015	0.1767	0.0019	0.68812	1035.2	5.5	1049	10	1014	17	1049	10	1.33308	Single Age
12WPY05_61	171.7	1.312	1.611	0.015	0.1577	0.0012	0.26546	974.3	6	943.7	6.9	1043	21	943.7	6.9	3.14072	Single Age
12WPY05_62	445	1.29	10.38	0.12	0.4327	0.0058	0.72597	2468	11	2317	26	2602	14	2602	14	10.9531	Single Age
12WPY05_63	676	1.6	1.093	0.027	0.1014	0.0024	0.55744	748	13	624	14	1137	47	DISC	DISC	16.5775	Single Age
12WPY05_64	231.3	1.725	1.532	0.014	0.1528	0.0019	0.72793	942.9	5.6	918	11	1010	15	918	11	2.64079	Single Age
12WPY05_65	212	0.888	6.003	0.055	0.3534	0.004	0.74757	1975.7	7.9	1953	19	2013	14	2013	14	2.98063	Single Age
12WPY05_66	247.2	2.39	0.836	0.012	0.0998	0.0013	0.46337	616.7	6.8	613	7.7	634	18	613	7.7	0.599968	Single Age
12WPY05_67	153	1.09	1.319	0.023	0.1344	0.0021	0.56906	854.6	9.7	813	12	978	29	813	12	4.86777	Single Age
12WPY05_68	190.9	0.849	1.729	0.031	0.1612	0.0017	0.20637	1018	11	964.7	9.7	1148	31	964.7	9.7	5.23576	Single Age
12WPY05_69	81.3	0.507	1.452	0.036	0.1477	0.0031	0.91496	911	14	888	17	963	21	888	17	2.5247	Single Age
12WPY05_70	524	1.67	12.12	0.19	0.4484	0.0064	0.6376	2612	14	2387	29	2803	18	2803	18	14.8412	Single Age
12WPY05_71	329	2.72	1.029	0.032	0.1138	0.0022	0.42735	718	16	694	13	809	54	694	13	3.34262	Single Age
12WPY05_72	310	1.158	1.88	0.017	0.1779	0.0016	0.78439	1073.9	6.2	1055.1	9	1113	13	1055.1	9	1.75063	Single Age
12WPY05_73	55.6	3.329	1.096	0.038	0.1205	0.0018	0.64014	749	18	734	10	804	57	734	10	2.00267	Single Age
12WPY05_74	564	1.878	0.886	0.012	0.1046	0.0016	0.84056	643.8	6.3	641.4	9.4	676	17	641.4	9.4	0.372787	Single Age
12WPY05_75	343.8	6.41	1.075	0.027	0.1211	0.0048	0.77738	741	13	737	27	790	55	737	27	0.539811	Rim
12WPY05_75	336.6	1.256	1.391	0.019	0.1449	0.0017	0.83215	887.8	7.8	871.9	9.7	933	16	871.9	9.7	1.79094	Core
12WPY05_76	399	10.58	0.793	0.046	0.0908	0.0031	0.82195	592	26	560	18	743	84	560	18	5.40541	Rim
12WPY05_76	304.1	2.15	4.06	0.13	0.268	0.0081	0.93583	1643	25	1529	41	1795	26	1795	26	14.8189	Core
12WPY05_77	54.8	4.85	0.975	0.055	0.1074	0.0037	0.17358	690	28	658	21	828	78	658	21	4.63768	Rim
12WPY05_77	300	1.85	1.717	0.027	0.167	0.0029	0.87994	1017	10	995	16	1055	17	995	16	2.16323	Core
12WPY05_78	202	0.437	5.143	0.046	0.3289	0.0035	0.73725	1842.8	7.5	1837	17	1868	13	1868	13	1.65953	Single Age
12WPY05_79	197	2.7	1.003	0.016	0.1165	0.0015	0.84255	704.8	7.9	710.5	8.4	700	18	710.5	8.4	0.80874	Single Age
12WPY05_80	568	13	0.842	0.013	0.0988	0.0018	0.70815	620.4	7.5	607	10	684	25	607	10	2.1599	Single Age
12WPY05_81	919	37	0.845	0.019	0.096	0.002	0.7648	621	11	591	12	755	29	591	12	4.83092	Rim
12WPY05_81	154.3	1.9	1.635	0.028	0.1662	0.0027	0.8244	983	11	991	15	958	21	991	15	0.813835	Core
12WPY05_82	590	14.4	7.14	0.13	0.4055	0.0095	0.58509	2129	17	2194	44	2073	43	2073	43	5.83695	Rim
12WPY05_82	152.8	0.869	18.06	0.25	0.6055	0.0097	0.80038	2995	13	3059	36	2953	17	2953	17	3.58957	Core
12WPY05_83	148.8	0.435	1.224	0.016	0.1345	0.0015	0.27045	811.3	7.1	813.4	8.4	794	24	813.4	8.4	0.258844	Single Age
12WPY05_84	225.2	3.95	0.919	0.012	0.1079	0.0012	0.61633	661.7	6.2	660.6	7.2	664	21	660.6	7.2	0.166238	Single Age
12WPY05_85	1480	83.6	1.643	0.018	0.1719	0.0032	0.44669	986.7	7	1022	18	931	35	1022	18	3.57758	Rim
12WPY05_85	205	2.19	2.663	0.056	0.2325	0.0036	0.81724	1321	16	1351	18	1281	26	1281	26	5.46448	Core
12WPY05_86	370	2.48	14.41	0.54	0.5114	0.0098	0.83754	2765	35	2660	42	2845	39	2845	39	6.50264	Single Age
12WPY05_87	108.4	0.698	0.8967	0.0093	0.1085	0.001	0.55068	649.8	5	663.9	6	602	21	663.9	6	2.1699	Single Age
12WPY05_88	684	11.2	1.104	0.051	0.1128	0.0031	0.91704	759	26	692	19	976	47	692	19	8.8274	Rim
12WPY05_88	77.3	0.683	5.07	0.1	0.3237	0.0046	0.83969	1830	17	1813	24	1851	23	1851	23	2.05294	Core
12WPY05_89	252	0.531	0.806	0.036	0.0815	0.0028	0.64418	599	20	505	16	982	76	DISC	DISC	15.6928	Rim
12WPY05_89	81.6	0.653	1.45	0.018	0.1517	0.0025	0.53229	909.5	7.5	911	14	907	29	911	14	0.164926	Core
12WPY05_90	75	0.312	5.31	0.048	0.3351	0.0039	0.73374	1870	7.8	1863	19	1893	15	1893	15	1.58479	Single Age
12WPY05_91	155.6	0.3541	1.639	0.027	0.1605	0.0023	0.86216	984	10	959	13	1040	17	959	13	2.54065	Single Age
12WPY05_92	205	1.28	0.8822	0.0073	0.1064	0.0011	0.61074	642	3.9	651.6	6.3	613	17	651.6	6.3	1.49533	Single Age
12WPY05_93	224	0.96	1.402	0.016	0.1488	0.0016	0.84053	889.4	6.6	894	8.8	891	13	894	8.8	0.517203	Single Age
12WPY05_94	283.2	1.415	1.395	0.013	0.146	0.0015	0.64548	886.6	5.5	878.6	8.3	907	15	878.6	8.3	0.902323	Single Age
12WPY05_95	261	0.855	0.842	0.0057	0.1011	0.00081	0.47541	620.1	3.2	621.4	4.8	622	16	621.4	4.8	0.209644	Single Age
12WPY05_96	147.5	0.5994	5.78	0.054	0.348	0.0036	0.70983	1942.8	8.1	1927	17	1966	13	1966	13	1.98372	Single Age
12WPY05_97	230	0.792	6.591	0.063	0.382	0.0043	0.81515	2057.5	8.4	2085	20	2033.8	9.5	2033.8	9.5	2.51746	Single Age
12WPY05_98	339.4	72	0.908	0.015	0.1052	0.0019	0.77491	655.4	8	645	11	684	23	645	11	1.58682	Single Age
12WPY05_99	133.1	0.936	1.745	0.02	0.1698	0.002	0.72966	1026	7.4	1011	11	1063	18	1011	11	1.46199	Single Age
12WPY05_100	154	1.516	1.398	0.024	0.1452	0.002	0.83792	887	10	874	11	925	16	874	11	1.46561	Single Age
12WPY05_101	248	2.028	3.276	0.041	0.2286	0.0027	0.52638	1474.8	9.8	1327	14	1707	25	1707	25	22.2613	Single Age
12WPY05_102	37.6	0.831	0.922	0.017	0.1082	0.0015	0.2688	662.6	9.2	662.2	8.4	681	46	662.2	8.4	0.0603682	Single Age
12WPY05_103	317	1.833	1.271	0.057	0.1257	0.0022	0.26599	827	24	763	13	1008	84	763	13	7.73881	Single Age
12WPY05_104	832	0.81	0.7473	0.0078	0.0895	0.00093	0.73388	566.5	4.5	552.6	5.5	637	16	552.6	5.5	2.45366	Single Age
12WPY05_105	1438	2.64	1.03	0.025	0.08197	0.00087	0.34992	717	13	507.8	5.2	1469	40	DISC	DISC	29.1771	Single Age
12WPY05_106	200.5	0.922	10.83	0.11	0.4775	0.005	0.81487	2507.5	9.5	2516	22	2503.4	9.8	2503.4	9.8	0.503315	Single Age
12WPY05_107	790	12.36	0.794	0.024	0.0971	0.0027	0.86862	593	14	597	16	622	36	597	16	0.674536	Rim
12WPY05_107	222.6	0.429	1.726	0.02	0.1705	0.0019	0.65956	1019.1	7.4	1015	11	1029	18	1015	11	0.402316	Core
12WPY05_108	58.9	0.6139	5.635	0.067	0.3523	0.0043	0.73859	1921	10	1945	20	1909	14	1909	14	1.8858	Single Age
12WPY05_109	115	1.15	5.348	0.084	0.3422	0.0046	0.84532	1877	14	1897	22	1862	16	1862	16	1.8797	Single Age
12WPY05_110	1479	1.855	7.46	0.12	0.3707	0.0044	0.86523	2168	14	2037	21	2290	13	2290	13	11.048	Single Age
12WPY05_111	94.3	0.909	1.019	0.011	0.118	0.0013	0.56342	713.7	5.6	719	7.4	697	22	719	7.4	0.742609	Single Age
12WPY05_112	538	4.09	0.6747	0.0071	0.0836	0.001	0.7773	523.4	4.3	517.7	5.9	564	16	517.7	5.9	1.08903	Single Age
12WPY05_113	598	1.193	0.725	0.013	0.0877	0.0016	0.85862	554.5	7.4	541.9	9.2	601	19	541.9	9.2	2.27232	Single Age
12WPY05_114	254.8	0.66	1.466	0.016	0.1464	0.001	0.53912	916.9	6.7	880.9	5.9	1001	19	880.9	5.9	3.92627	Single Age
12WPY05_115	154.5	0.794	0.879	0.011	0.1045	0.0011	0.28659	640.4	5.7	640.5	6.6	643	22	640.5	6.6	0.0156152	Single Age
12WPY05_116	276	4.03	1.505	0.017	0.1566	0.0019	0.8526	931.8	6.7	938	10	923	12	938	10	0.665379	Single Age
12WPY05_117	155.8	0.993	1.707	0.019	0.1666	0.0015	0.089227	1010.8	7.2	993.5	8.5	1038	20	993.5	8.5	1.71152	Single Age
12WPY05_118	190.7	0.909	1.692	0.018	0.1697	0.0018	0.63173	1005.2	6.6	1010	10	1005	20	1010	10	0.477517	Single Age
12WPY05_119	336	0.861	1.561	0.027	0.1534	0.0025	0.86927	954	10	920	14	1028	17	920	14	3.56394	Single Age
12WPY05_120	670	2.2	0.8901	0.0087	0.1031	0.001	0.79806	646.2	4.7	632.5	5.9	686	14	632.5	5.9	2.12009	Single Age
12WPY05_121	141.9	1.39	1.204	0.02	0.1313	0.0021	0.82652	801.8	9.1	795	12	810	20	795	12	0.848092	Single Age
12WPY05_122	225	3.9	3.27	0.17	0.1984	0.0064	0.92808	1467	39	1169	35	1900	48	DISC	DISC	20.3136	Single Age
12WPY05_123	51.7	0.573	1.471	0.024	0.1483	0.0019	0.70671	919.2	9.9	893	11	989	23	893	11	2.8503	Single Age
12WPY05_124	860	31.3	0.995	0.053	0.1129	0.0036	0.94438	700	26	689	21	732	49	689	21	1.57143	Rim
12WPY05_124	80.4	1.463	7.35	0.11	0.3992	0.005	0.79982	2153	13	2169	24	2138	17	2138	17	1.44995	Core
12WPY05_125	169.6	1.38	6.704	0.062	0.3884	0.0038	0.81322	2073.7	8.5	2115	17	2030	12	2030	12	4.18719	Single Age
12WPY05_126	235	0.543	1.706	0.019	0.168	0.0024	0.75936	1010.5	7	1001	13	1040	23	1001	13	0.940129	Single Age
12WPY05_127	320	1.225	1.028	0.016	0.1148	0.0019	0.7917	718.4	8	701	11	779	20	701	11	2.42205	Single Age
12WPY05_128	756	28.2	0.638	0.021	0.0776	0.0025	0.91551	501	13	482	15	615	35	482	15	3.79242	Rim
12WPY05_128	101	1.412	1.046	0.016	0.1228	0.0014	0.4031	728.4	6.9	746.4	8.3	682	25	746.4	8.3	2.47117	Core
12WPY05_129	796.3	1.041	0.6189	0.0073	0.0745	0.001	0.81522	489	4.5	463.7	6	642	18	463.7	6	5.17382	Single Age
12WPY05_130	118.9	0.848	2.037	0.017	0.1963	0.0015	0.41135	1127.5	5.8	1155.2	8.2	1089	18	1155.2	8.2	2.45676	Single Age
12WPY05_131	187	0.61	10.64	0.12	0.4309	0.0057	0.80391	2493	10	2309	26	2662	14	2662	14	13.2607	Single Age
12WPY05_132	918	81.3	0.719	0.014	0.0829	0.0024	0.64928	550.6	8.3	513	14	733	45	513	14	6.82891	Single Age
12WPY05_133	102.3	85	0.7157	0.0078	0.08693	0.00074	0.33222	547.9	4.6	537.3	4.4	615	24	537.3	4.4	1.93466	Single Age
12WPY05_134	131.1	2.49	1.418	0.015	0.15	0.0019	0.73782	897.1	6.4	902	11	890	19	902	11	0.546204	Single Age
12WPY05_135	102.2	0.6571	1.702	0.02	0.1688	0.0018	0.2896	1008.8	7.6	1005.6	9.7	1022	23	1005.6	9.7	0.317209	Single Age
12WPY05_136	187	1.26	0.835	0.018	0.1003	0.0018	0.77853	616	10	616	11	636	28	616	11	0	Single Age
12WPY05_137	299	5.03	1.072	0.029	0.0647	0.0016	0.29345	739	14	403.9	9.7	700	45	DISC	DISC	45.3451	Rim
12WPY05_137	148.6	1.736	1.78	0.036	0.1052	0.0022	0.69711	1037	13	645	13	764	30	DISC	DISC	37.8014	Core
12WPY05_138	334	1.804	1.804	0.045	0.1624	0.0025	0.73692	1047	16	970	14	1228	33	970	14	7.35435	Single Age
12WPY05_139	339.8	0.741	1.394	0.024	0.1397	0.0027	0.82391	886	10	843	15	1004	24	843	15	4.85327	Single Age
12WPY05_140	83.9	0.89	0.853	0.012	0.1028	0.0014	0.56571	625.7	6.7	631.9	8.4	615	30	631.9	8.4	0.99089	Single Age
12WPY05_141	217	0.654	6.747	0.056	0.3812	0.0035	0.37203	2078.3	7.4	2082	16	2089	13	2089	13	0.335089	Single Age
12WPY05_142	1061	5	0.6472	0.0075	0.0793	0.0011	0.88882	506.6	4.6	491.7	6.4	609	14	491.7	6.4	2.94118	Single Age
12WPY05_143	177	1.05	1.51	0.028	0.1561	0.0029	0.93934	933	12	938	15	929	22	938	15	0.535906	Single Age
12WPY05_144	521	150.8	0.789	0.038	0.0932	0.0067	0.85444	590	22	574	39	678	85	574	39	2.71186	Rim
12WPY05_144	297	4.7	6.42	0.18	0.2979	0.0079	0.95697	2035	25	1679	40	2424	13	DISC	DISC	30.7343	Core
12WPY05_145	432	0.711	0.988	0.021	0.0624	0.0014	0.89431	697	11	390.1	8.4	628	18	DISC	DISC	44.0316	Single Age
12WPY05_146	728	1.494	0.931	0.025	0.1054	0.0029	0.95202	666	13	645	17	755	15	645	17	3.15315	Single Age
12WPY05_147	131.3	3.65	4.861	0.085	0.3049	0.0046	0.87875	1793	15	1715	23	1890	14	1890	14	9.25926	Single Age
12WPY05_148	27.8	0.273	1.551	0.04	0.1512	0.0026	0.47322	949	16	908	15	1029	46	908	15	4.32034	Single Age
12WPY05_149	57.6	0.85	1.9	0.22	0.1417	0.0047	0.68334	1059	70	854	26	1570	180	DISC	DISC	19.3579	Single Age
12WPY05_150	133.2	5.25	1.005	0.012	0.1155	0.0015	0.64307	706	5.9	704.3	8.5	701	20	704.3	8.5	0.240793	Single Age
12WPY31_1	52.3	1.022	1.741	0.022	0.1715	0.0021	0.4666	1024.2	8.4	1020	12	1042	27	1020	12	0.410076	Single Age
12WPY31_2	23	0.867	2.298	0.049	0.2059	0.005	0.51133	1211	15	1206	27	1232	46	1232	46	2.11039	Single Age
12WPY31_3	120	1.66	0.945	0.019	0.1095	0.0015	0.54261	676	10	669.8	9	664	33	669.8	9	0.91716	Single Age
12WPY31_4	374.8	1.95	5.36	0.087	0.3285	0.0052	0.93326	1878	14	1830	25	1929	10	1929	10	5.13219	Single Age
12WPY31_5	169.4	0.446	1.641	0.015	0.165	0.0012	0.52036	986.4	6	984.4	6.5	990	17	984.4	6.5	0.202758	Single Age
12WPY31_6	266.6	1.76	5.59	0.15	0.2689	0.0056	0.95144	1912	23	1534	29	2382	19	DISC	DISC	35.6003	Single Age
12WPY31_7	197.4	0.614	1.807	0.022	0.1664	0.0013	0.45004	1047.4	7.9	992.3	7	1161	22	992.3	7	5.26065	Single Age
12WPY31_8	308	1.182	0.871	0.011	0.10433	0.00085	0.57861	635.6	5.7	639.7	5	615	24	639.7	5	0.64506	Single Age
12WPY31_9	193.4	4.29	1.199	0.014	0.1289	0.0012	0.39641	800.7	6.4	781.5	7.1	859	24	781.5	7.1	2.3979	Single Age
12WPY31_10	403	3.25	0.992	0.015	0.1159	0.0016	0.77839	699.5	7.5	707	9.5	672	20	707	9.5	1.07219	Single Age
12WPY31_11	527	2.984	0.868	0.0074	0.10254	0.00062	0.39611	634.3	4	629.2	3.6	658	18	629.2	3.6	0.804036	Single Age
12WPY31_12	41.6	0.456	1.84	0.11	0.1528	0.0051	0.68449	1049	37	916	28	1317	77	DISC	DISC	12.6787	Single Age
12WPY31_13	76.2	1.335	0.926	0.014	0.1112	0.0012	0.11184	665.8	7.6	679.7	7.1	633	37	679.7	7.1	2.08771	Single Age
12WPY31_14	484	0.49	0.9111	0.0089	0.108	0.0011	0.77791	657.4	4.7	661	6.1	658	13	661	6.1	0.547612	Single Age
12WPY31_15	1364	2.55	0.914	0.018	0.1002	0.0013	0.73371	658.5	9.4	615.5	7.8	824	21	615.5	7.8	6.52999	Rim
12WPY31_15	766	4.47	1.25	0.011	0.1298	0.0014	0.59191	823.4	5	786.8	7.8	911	19	786.8	7.8	4.44498	Core
12WPY31_16	235.7	46.5	0.878	0.018	0.1039	0.0015	0.19669	639.5	9.5	637	9	680	48	637	9	0.39093	Rim
12WPY31_16	361	8.7	5.15	0.14	0.3217	0.0073	0.96819	1841	24	1797	36	1891	14	1891	14	4.97091	Core
12WPY31_17	57.3	1.177	1.919	0.031	0.1832	0.0021	0.31472	1087	11	1086	12	1090	34	1086	12	0.0919963	Single Age
12WPY31_18	60.5	0.743	3.11	0.12	0.2166	0.006	0.91206	1427	29	1262	32	1696	29	1696	29	25.5896	Single Age
12WPY31_19	456	3.65	0.9092	0.0088	0.10766	0.00099	0.67112	656.4	4.7	659.1	5.8	644	17	659.1	5.8	0.411335	Single Age
12WPY31_20	236	1.516	1.405	0.016	0.1492	0.0016	0.53928	890.5	6.9	896.4	9.1	877	19	896.4	9.1	0.662549	Single Age
12WPY31_21	123.8	1.024	12.67	0.27	0.4806	0.0073	0.74602	2653	20	2529	32	2737	24	2737	24	7.59956	Single Age
12WPY31_22	33.3	1.39	1.236	0.078	0.1403	0.0073	0.75003	818	37	844	41	742	60	844	41	3.17848	Single Age
12WPY31_23	606	6	0.852	0.012	0.0983	0.0017	0.86169	625.5	6.5	604.5	9.7	715	16	604.5	9.7	3.35731	Single Age
12WPY31_24	131	1.094	7.245	0.082	0.395	0.0036	0.88644	2141	10	2146	17	2122	14	2122	14	1.13101	Single Age
12WPY31_25	487	1.62	5.56	0.3	0.304	0.012	0.97135	1907	46	1714	57	2110	28	2110	28	18.7678	Single Age
12WPY31_26	2520	5.21	3.602	0.069	0.2564	0.0045	0.90378	1549	15	1471	23	1664	22	1664	22	11.5986	Rim
12WPY31_26	307	0.997	6.14	0.11	0.3468	0.0033	0.8635	1995	15	1919	16	2075	18	2075	18	7.51807	Core
12WPY31_27	97.7	1.41	0.812	0.017	0.0981	0.0014	0.17092	602.9	9.4	603.4	8.4	594	44	603.4	8.4	0.0829325	Single Age
12WPY31_28	1061	7.74	0.996	0.02	0.1097	0.002	0.84386	702	10	671	12	825	21	671	12	4.41595	Single Age
12WPY31_29	35.1	1.048	7.061	0.079	0.3853	0.004	0.47067	2118.2	9.9	2103	18	2119	20	2119	20	0.755073	Single Age
12WPY31_30	87.5	0.64	1.968	0.036	0.1901	0.0034	0.87182	1103	13	1121	19	1054	25	1121	19	1.63191	Single Age
12WPY31_31	90.6	0.752	1.609	0.036	0.1629	0.0033	0.87057	972	14	973	18	958	28	973	18	0.102881	Single Age
12WPY31_32	42.5	0.472	1.577	0.03	0.1548	0.0024	0.047414	960	12	928	14	1041	46	928	14	3.33333	Single Age
12WPY31_33	174	1.93	5.79	0.15	0.3415	0.0069	0.93275	1945	22	1893	33	2003	18	2003	18	5.49176	Single Age
12WPY31_34	207.9	1.164	5.382	0.071	0.3012	0.0035	0.89381	1883	12	1697	17	2091	12	2091	12	18.8427	Single Age
12WPY31_35	332	3.7	0.994	0.011	0.1134	0.0011	0.48408	700.6	5.7	692.6	6.3	713	21	692.6	6.3	1.14188	Single Age
12WPY31_36	480	1.549	0.7608	0.006	0.09317	0.00077	0.42221	574.4	3.5	574.2	4.5	570	20	574.2	4.5	0.0348189	Single Age
12WPY31_37	111.4	0.206	1.625	0.045	0.1536	0.002	0.53258	979	17	921	11	1108	44	921	11	5.92441	Single Age
12WPY31_39	720	11.8	0.984	0.011	0.1107	0.0011	0.82379	695.3	5.7	676.7	6.4	743	13	676.7	6.4	2.6751	Single Age
12WPY31_40	323	2.57	5.512	0.089	0.3319	0.0039	0.9038	1901	14	1847	19	1954	15	1954	15	5.47595	Single Age
12WPY31_41	38.8	0.351	2.91	0.15	0.1925	0.0081	0.94949	1380	39	1132	43	1779	36	DISC	DISC	17.971	Single Age
12WPY31_42	251	0.241	1.654	0.028	0.1609	0.002	0.74059	991	10	962	11	1040	20	962	11	2.92634	Single Age
12WPY31_43	95.1	0.693	1.806	0.03	0.1802	0.0022	0.51711	1049	11	1068	12	1010	26	1068	12	1.81125	Single Age
12WPY31_44	57.6	1.164	1.779	0.027	0.1727	0.0026	0.23813	1038.3	9.6	1027	14	1048	37	1027	14	1.08832	Single Age
12WPY31_45	38.4	1.226	12.39	0.21	0.491	0.01	0.68058	2632	16	2580	46	2683	26	2683	26	3.83899	Single Age
12WPY31_46	87.7	0.54	1.651	0.022	0.1668	0.0014	0.36003	989.4	8.2	994.2	7.9	962	25	994.2	7.9	0.485143	Single Age
12WPY31_47	174.5	1.637	1.771	0.018	0.1747	0.0015	0.52837	1035.1	6.8	1038.1	8.2	1011	19	1038.1	8.2	0.289827	Single Age
12WPY31_48	280.4	2	0.904	0.012	0.1063	0.0015	0.71177	654.3	6.6	651.4	8.7	656	21	651.4	8.7	0.443222	Single Age
12WPY31_49	194.2	1.741	1.003	0.011	0.1173	0.0011	0.57895	705.2	5.6	715.1	6.2	663	22	715.1	6.2	1.40386	Single Age
12WPY31_51	126.2	1.257	1.664	0.018	0.168	0.0014	0.46576	994.4	6.7	1000.7	8	961	21	1000.7	8	0.633548	Single Age
12WPY31_52	125	0.61	1.794	0.017	0.1749	0.0015	0.40621	1043	6	1038.9	8.4	1052	20	1038.9	8.4	0.393097	Single Age
12WPY31_53	138.7	0.764	1.851	0.022	0.1813	0.0019	0.65114	1063.3	7.9	1074	10	1039	19	1074	10	1.0063	Single Age
12WPY31_54	136.4	0.5334	0.7001	0.0091	0.0859	0.0011	0.29484	539.3	5.6	530.9	6.3	583	36	530.9	6.3	1.55757	Single Age
12WPY31_55	246	5.61	0.7589	0.0076	0.09255	0.00072	0.28061	573.2	4.4	570.6	4.3	579	24	570.6	4.3	0.453594	Single Age
12WPY31_56	47.6	1.394	0.945	0.02	0.1123	0.0016	0.21998	675	10	686	9.3	657	48	686	9.3	1.62963	Single Age
12WPY31_57	231	2.84	0.993	0.014	0.1163	0.0014	0.5967	700.6	7	709.2	7.8	678	25	709.2	7.8	1.22752	Single Age
12WPY31_58	122.1	0.314	0.756	0.017	0.092	0.0015	0.2732	571	10	567.1	8.7	604	52	567.1	8.7	0.683012	Single Age
12WPY31_59	211.2	1.841	3.33	0.1	0.1998	0.0051	0.89096	1484	24	1173	27	1945	26	DISC	DISC	20.9569	Single Age
12WPY31_60	141.1	0.827	0.799	0.016	0.0979	0.0023	0.57779	595.4	8.9	602	13	588	45	602	13	1.1085	Single Age
12WPY31_61	150	1.93	0.973	0.012	0.1143	0.0013	0.51397	689.6	6.4	697.5	7.8	647	26	697.5	7.8	1.14559	Single Age
12WPY31_62	497	0.766	0.9131	0.0083	0.10567	0.00078	0.53018	658.6	4.4	647.5	4.6	709	17	647.5	4.6	1.68539	Single Age
12WPY31_63	206.8	1.656	5.702	0.044	0.3401	0.0034	0.56898	1931.4	6.6	1887	16	1979	15	1979	15	4.64881	Single Age
12WPY31_64	210	0.648	4.722	0.053	0.3044	0.0032	0.75435	1770.3	9.5	1715	16	1841	14	1841	14	6.84411	Single Age
12WPY31_65	25.7	48	0.936	0.067	0.1089	0.0045	0.23159	667	35	666	26	790	130	666	26	0.149925	Rim
12WPY31_65	174	0.804	1.778	0.025	0.1748	0.0019	0.50373	1037.2	9.1	1039	11	1043	29	1039	11	0.173544	Core
12WPY31_66	272	1.64	1.508	0.015	0.1574	0.0014	0.61511	934.7	6.1	942	7.8	920	16	942	7.8	0.780999	Single Age
12WPY31_67	142.6	2.114	1.428	0.019	0.1541	0.0019	0.70705	900.2	7.8	924	11	844	21	924	11	2.64386	Single Age
12WPY31_68	290	1.425	1.254	0.011	0.1376	0.0011	0.4244	825.1	4.8	830.9	6.4	830	19	830.9	6.4	0.702945	Single Age
12WPY31_69	101	6.1	0.877	0.041	0.1041	0.0037	0.27917	639	22	639	21	650	140	639	21	0	Rim
12WPY31_69	277	1.339	2.282	0.017	0.19	0.0017	0.50573	1206.6	5.4	1121.1	9.2	1356	13	1121.1	9.2	7.08603	Core
12WPY31_70	127.7	1.084	5.457	0.041	0.3465	0.0024	0.59131	1895	6.7	1918	11	1872	13	1872	13	2.45726	Single Age
12WPY31_71	104.2	0.449	5.6	0.18	0.3436	0.0097	0.96635	1909	28	1901	47	1933	14	1933	14	1.65546	Single Age
12WPY31_72	47.4	0.559	0.866	0.02	0.1052	0.0014	0.11519	632	11	644.7	8.2	585	52	644.7	8.2	2.00949	Single Age
12WPY31_73	76.4	0.875	1.843	0.025	0.1827	0.0016	0.41523	1061.4	8.7	1081.9	8.5	1020	25	1081.9	8.5	1.93141	Single Age
12WPY31_75	374	3.45	9.86	0.17	0.417	0.0088	0.93942	2420	16	2244	40	2579	12	2579	12	12.9895	Single Age
12WPY31_76	79.6	0.86	0.898	0.016	0.1081	0.0015	0.30012	651	8.3	661.7	8.7	615	36	661.7	8.7	1.64363	Single Age
12WPY31_77	294.9	1.535	1.69	0.017	0.168	0.0013	0.2373	1004.4	6.4	1002	7.4	1014	19	1002	7.4	0.238949	Single Age
12WPY31_78	287	0.89	1.601	0.018	0.1633	0.0019	0.48949	971.4	7.4	975	10	977	23	975	10	0.370599	Single Age
12WPY31_79	368	1.95	11.45	0.13	0.4709	0.0054	0.65427	2559	11	2490	24	2629	12	2629	12	5.28718	Single Age
12WPY31_80	92.8	0.807	15.61	0.2	0.5559	0.0066	0.90445	2852	12	2848	27	2863.3	8.8	2863.3	8.8	0.534348	Single Age
12WPY31_81	388	8.01	1.035	0.014	0.1182	0.0012	0.70565	721	6.9	720.3	6.8	729	18	720.3	6.8	0.0970874	Rim
12WPY31_81	193	2.45	1.369	0.042	0.1444	0.0023	0.70977	875	18	869	13	894	51	869	13	0.685714	Core
12WPY31_82	308	6.9	6.76	0.16	0.382	0.0069	0.95297	2076	23	2084	32	2069	18	2069	18	0.724988	Single Age
12WPY31_83	118	0.885	5.507	0.077	0.3408	0.0047	0.7863	1903	12	1890	23	1930	17	1930	17	2.07254	Single Age
12WPY31_84	401	4.94	15.7	0.2	0.5424	0.0041	0.55092	2858	12	2793	17	2912	15	2912	15	4.08654	Single Age
12WPY31_85	172.8	0.692	0.9881	0.0099	0.11441	0.00091	0.40388	697.5	5.1	698.3	5.2	708	22	698.3	5.2	0.114695	Single Age
12WPY31_86	136.3	0.419	4.571	0.049	0.2838	0.0035	0.81963	1747.1	9.1	1613	18	1918	15	1918	15	15.902	Single Age
12WPY31_87	289	1.276	3.19	0.13	0.2096	0.0043	0.94917	1457	31	1226	23	1815	36	DISC	DISC	32.4518	Single Age
12WPY31_88	115.8	1.05	2.792	0.045	0.2073	0.0024	0.65512	1352	12	1214	13	1575	24	1575	24	22.9206	Single Age
12WPY31_89	530	0.845	8.95	0.21	0.3666	0.008	0.97152	2328	21	2011	38	2627	8.2	2627	8.2	23.4488	Single Age
12WPY31_90	113.1	1.062	5.387	0.057	0.3434	0.0039	0.93119	1881.9	9.1	1903	19	1871	13	1871	13	1.71032	Single Age
12WPY31_91	67.4	1.91	0.953	0.015	0.11	0.0014	0.52155	680.2	8.1	672.9	7.9	690	30	672.9	7.9	1.07321	Single Age
12WPY31_92	232	2.02	6.14	0.044	0.3601	0.0031	0.78615	1995.6	6.3	1984	15	2013	8.1	2013	8.1	1.44064	Single Age
12WPY31_93	249	1.261	0.688	0.0081	0.0867	0.00088	0.27904	531.4	4.9	535.9	5.2	522	28	535.9	5.2	0.84682	Single Age
12WPY31_94	215	1.82	9.81	0.29	0.427	0.01	0.96742	2414	27	2287	47	2529	13	2529	13	9.569	Single Age
12WPY31_95	175	4.48	1.082	0.03	0.1238	0.0027	0.81725	743	14	752	16	695	30	752	16	1.21131	Single Age
12WPY31_96	193	6.9	0.884	0.016	0.1045	0.0012	0.51861	642.3	8.7	640.7	7.1	642	30	640.7	7.1	0.249105	Single Age
12WPY31_97	123.4	1.1	7.05	0.1	0.3272	0.0045	0.69978	2117	13	1825	22	2409	20	2409	20	24.2424	Single Age
12WPY31_98	282	1.141	1.381	0.023	0.1453	0.0026	0.84382	880.4	9.8	874	15	884	23	874	15	0.726942	Single Age
12WPY31_99	471	2.93	0.7777	0.0075	0.09572	0.00084	0.62982	584	4.3	589.2	5	559	17	589.2	5	0.890411	Single Age
12WPY31_100	393	4.37	9.21	0.46	0.398	0.016	0.99005	2337	48	2153	75	2522	20	2522	20	14.6312	Single Age
12WPY31_101	852	77	2.663	0.063	0.1766	0.0034	0.7215	1318	17	1048	19	1797	30	DISC	DISC	20.4856	Rim
12WPY31_101	483	7	6.97	0.4	0.283	0.012	0.98021	2096	52	1602	60	2627	28	DISC	DISC	39.0179	Core
12WPY31_102	299	1.153	0.913	0.017	0.1074	0.0018	0.8104	658	8.9	657	10	671	23	657	10	0.151976	Single Age
12WPY31_103	1045	6.576	3.079	0.08	0.2234	0.0034	0.77083	1427	19	1299	18	1614	27	1614	27	19.5167	Single Age
12WPY31_104	222.2	1.58	0.6856	0.0086	0.08697	0.00088	0.39466	529.9	5.2	537.6	5.2	495	27	537.6	5.2	1.4531	Single Age
12WPY31_105	184	1.93	7.05	0.39	0.372	0.018	0.9858	2091	53	2026	87	2189	17	2189	17	7.44632	Single Age
12WPY31_106	212.2	0.334	10.47	0.16	0.4387	0.0075	0.80422	2479	15	2348	34	2583	15	2583	15	9.09795	Single Age
12WPY31_107	202.4	0.955	4.989	0.073	0.3051	0.0042	0.86938	1816	12	1716	21	1918	15	1918	15	10.5318	Single Age
12WPY31_108	326	0.607	0.8783	0.0078	0.10487	0.0009	0.40208	639.9	4.2	642.8	5.3	629	20	642.8	5.3	0.453196	Single Age
12WPY31_109	220.3	0.79	0.7862	0.0086	0.09424	0.00089	0.36331	588.8	4.9	580.5	5.3	621	26	580.5	5.3	1.40965	Single Age
12WPY31_110	195.8	0.764	6.45	0.069	0.3757	0.004	0.82677	2038.3	9.6	2055	19	2003	13	2003	13	2.59611	Single Age
12WPY31_112	65.8	0.674	4.752	0.047	0.3171	0.0033	0.54762	1775.7	8.3	1775	16	1777	18	1777	18	0.112549	Single Age
12WPY31_113	124.1	0.999	2.031	0.026	0.1834	0.0023	0.5988	1125.3	8.8	1087	12	1190	23	1087	12	3.40354	Single Age
12WPY31_114	64.2	0.728	14.22	0.24	0.5505	0.0084	0.61831	2764	16	2827	35	2713	19	2713	19	4.20199	Single Age
12WPY31_115	779	18.9	0.7505	0.0075	0.09147	0.00083	0.80946	568.4	4.3	564.2	4.9	583	16	564.2	4.9	0.738916	Single Age
12WPY31_116	55.4	3.38	1.034	0.031	0.1025	0.0018	0.20249	719	15	629	10	1013	62	DISC	DISC	12.5174	Single Age
12WPY31_117	283	4.38	0.9	0.014	0.1037	0.0017	0.71572	653.1	7.7	636	10	701	28	636	10	2.61828	Single Age
12WPY31_118	268	0.62	1.902	0.026	0.1839	0.0023	0.6602	1081	9.1	1088	12	1073	20	1088	12	0.647549	Single Age
12WPY31_119	260	0.974	12.43	0.19	0.4667	0.0071	0.81134	2636	14	2468	31	2755	16	2755	16	10.4174	Single Age
12WPY31_120	193.3	0.606	10.75	0.17	0.4672	0.006	0.81921	2500	15	2471	26	2515	15	2515	15	1.7495	Single Age
12WPY31_121	272	1.066	9.22	0.35	0.4	0.012	0.98242	2347	39	2166	57	2511	21	2511	21	13.7395	Single Age
12WPY31_122	168	4.03	0.794	0.01	0.0979	0.001	0.37934	593.2	5.8	601.9	5.9	553	28	601.9	5.9	1.46662	Single Age
12WPY31_123	312	0.64	0.873	0.012	0.1038	0.0013	0.80972	637	6.3	636.6	7.6	630	18	636.6	7.6	0.0627943	Single Age
12WPY31_124	119	1.152	0.986	0.015	0.1173	0.0013	0.42867	696.2	7.5	715	7.5	637	32	715	7.5	2.70037	Single Age
12WPY31_125	444	6.43	0.944	0.015	0.1101	0.0012	0.69177	674.8	7.6	673.5	7.2	668	24	673.5	7.2	0.19265	Single Age
12WPY31_126	251	5.69	0.99	0.014	0.1153	0.0014	0.11224	698.4	7	703.7	7.8	685	32	703.7	7.8	0.758877	Single Age
12WPY31_127	152.4	1.227	1.672	0.02	0.1685	0.0016	0.55688	997.3	7.8	1003.6	8.7	988	20	1003.6	8.7	0.631706	Single Age
12WPY31_128	138	2.05	0.848	0.012	0.10189	0.00097	0.26514	624.2	6.8	625.4	5.6	607	32	625.4	5.6	0.192246	Single Age
12WPY31_129	361.8	1.91	1.0385	0.0094	0.1189	0.001	0.67668	723.6	4.8	724.3	5.8	714	17	724.3	5.8	0.0967385	Single Age
12WPY32_1	85	0.725	6.252	0.051	0.3729	0.0036	0.61009	2011.3	7.1	2043	17	1977.2	6.1	1977.2	6.1	3.32794	Single Age
12WPY32_2	86.6	1.11	6.118	0.071	0.3685	0.0047	0.81473	1993	10	2025	21	1963.5	7	1963.5	7	3.13216	Single Age
12WPY32_3	18.8	0.3202	1.61	0.025	0.1636	0.0018	0.17198	975.8	9.9	976	10	969	20	976	10	0.020496	Single Age
12WPY32_4	138	0.895	11.14	0.3	0.4603	0.0089	0.96596	2534	25	2439	39	2602.4	8	2602.4	8	6.27882	Single Age
12WPY32_5	141	1.33	0.887	0.019	0.1049	0.002	0.8145	644	10	643	12	711	19	643	12	0.15528	Single Age
12WPY32_6	426	0.56	1.033	0.015	0.1201	0.0022	0.84355	720.3	7.4	731	13	713	16	731	13	1.48549	Single Age
12WPY32_7	330	0.772	0.886	0.01	0.10612	0.00094	0.56485	644.2	5.4	650.1	5.5	630	9.6	650.1	5.5	0.915865	Single Age
12WPY32_8	236	1.557	1.696	0.03	0.1707	0.0028	0.90481	1006	11	1019	15	964	11	1019	15	1.29225	Single Age
12WPY32_9	468.7	17.38	5.904	0.065	0.3695	0.0037	0.61141	1961.1	9.6	2027	17	1883.3	9.9	1883.3	9.9	7.63022	Single Age
12WPY32_11	182	1.012	1.797	0.029	0.1767	0.0014	0.3279	1043	11	1049.1	7.5	1033	15	1049.1	7.5	0.584851	Single Age
12WPY32_12	233	1.58	0.977	0.017	0.1173	0.0021	0.83658	691.4	9	715	12	617	15	715	12	3.41336	Single Age
12WPY32_13	194.9	1.198	8.65	0.16	0.3971	0.0046	0.84157	2299	17	2155	21	2418	12	2418	12	10.8768	Single Age
12WPY32_14	78.7	0.802	1.771	0.035	0.1741	0.0022	0.83339	1034	13	1035	12	1029	11	1035	12	0.0967118	Single Age
12WPY32_15	37.1	42.2	0.779	0.017	0.0948	0.0013	0.64912	583.9	9.9	583.8	7.5	607	18	583.8	7.5	0.0171262	Single Age
12WPY32_16	938	13.9	1.162	0.012	0.1348	0.0012	0.68947	783.6	5.7	815.4	7	704.8	5.4	815.4	7	4.05819	Single Age
12WPY32_17	155	0.97	6.042	0.081	0.3623	0.0041	0.89043	1981	12	1995	19	1956	6.4	1956	6.4	1.99387	Single Age
12WPY32_18	97.9	0.5722	6.847	0.07	0.3838	0.0033	0.61014	2091.2	9.1	2094	16	2075.4	7.9	2075.4	7.9	0.896213	Single Age
12WPY32_19	101.5	0.629	1.882	0.069	0.1803	0.0019	0.74074	1065	19	1070	11	1046	40	1070	11	0.469484	Single Age
12WPY32_20	237	1.031	9.43	0.068	0.4576	0.0043	0.64594	2380.4	6.6	2431	19	2336.5	5.2	2336.5	5.2	4.04451	Single Age
12WPY32_21	221	2.74	1.491	0.092	0.1447	0.0047	0.93167	920	39	870	27	1090	60	870	27	5.43478	Single Age
12WPY32_22	525	4.91	6.664	0.063	0.3777	0.0048	0.60543	2067.1	8.4	2065	22	2070	19	2070	19	0.241546	Single Age
12WPY32_23	137.7	1.264	1.629	0.023	0.1656	0.0015	0.81326	980.7	9.1	987.9	8.5	960.6	7.8	987.9	8.5	0.734169	Single Age
12WPY32_24	99	1.56	0.91	0.01	0.10763	0.00087	0.4732	656.8	5.5	658.9	5	651	10	658.9	5	0.319732	Single Age
12WPY32_25	122.2	0.852	0.8887	0.0097	0.10504	0.00082	0.42693	645.4	5.2	643.8	4.8	655	14	643.8	4.8	0.247908	Single Age
12WPY32_26	297	1.356	1.534	0.026	0.1606	0.002	0.76539	945	11	960	11	884	9.3	960	11	1.5873	Single Age
12WPY32_27	70.7	0.3456	1.44	0.015	0.1525	0.0013	0.3615	905.3	6.1	915	7	878	13	915	7	1.07147	Single Age
12WPY32_28	119.8	0.819	12.158	0.084	0.4894	0.0028	0.3238	2617.3	6.7	2568	12	2638.9	6	2638.9	6	2.68673	Single Age
12WPY32_29	230	0.722	0.972	0.014	0.1164	0.0015	0.78108	689.1	7.4	709.5	8.7	630.3	9.7	709.5	8.7	2.96038	Single Age
12WPY32_30	293	1.4	6.186	0.051	0.3536	0.0026	0.55075	2003.1	7.4	1952	12	2037.1	6	2037.1	6	4.17751	Single Age
12WPY32_31	251	0.764	1.397	0.012	0.1481	0.0013	0.61341	887.3	5	891.2	7.2	859.7	6.9	891.2	7.2	0.439536	Single Age
12WPY32_32	106.2	1.191	0.954	0.011	0.11012	0.00097	0.48209	679.7	5.6	673.4	5.6	684	13	673.4	5.6	0.92688	Single Age
12WPY32_33	350	0.488	1.056	0.013	0.123	0.0015	0.72363	731.7	6.7	747.8	8.8	658	10	747.8	8.8	2.20036	Single Age
12WPY32_34	236	1.286	11.5	0.16	0.4581	0.0069	0.89157	2566	12	2430	30	2650.8	7	2650.8	7	8.32956	Single Age
12WPY32_35	72.2	0.6	1.533	0.016	0.1568	0.0015	0.33097	943.4	6.3	938.8	8.6	931	12	938.8	8.6	0.487598	Single Age
12WPY32_36	331	1.642	7.01	0.29	0.341	0.011	0.96154	2104	37	1891	53	2293	25	2293	25	17.5316	Single Age
12WPY32_37	67.6	0.5546	1.717	0.015	0.1713	0.0014	0.24439	1014.6	5.7	1019.3	7.8	990.2	9.6	1019.3	7.8	0.463237	Single Age
12WPY32_38	16.73	25.6	0.895	0.021	0.1026	0.0015	0.080073	648	11	629.7	8.8	664	33	629.7	8.8	2.82407	Single Age
12WPY32_39	213.3	0.775	8.9	0.12	0.3684	0.0064	0.63675	2328	12	2021	30	2552	12	2552	12	20.8072	Single Age
12WPY32_41	20.55	1.109	1.439	0.024	0.1541	0.0022	0.33956	905	10	924	12	828	19	924	12	2.09945	Single Age
12WPY32_42	665	2.331	9.917	0.091	0.394	0.0028	0.50332	2426.6	8.5	2141	13	2651.5	7.7	2651.5	7.7	19.2533	Single Age
12WPY32_43	334	0.857	1.23	0.013	0.1384	0.0015	0.59955	813.9	5.8	835.4	8.5	770	10	835.4	8.5	2.6416	Single Age
12WPY32_44	112	1.12	1.172	0.017	0.1261	0.0012	0.37968	787.2	8	765.7	6.6	845	17	765.7	6.6	2.7312	Single Age
12WPY32_45	28.4	0.433	1.664	0.024	0.168	0.002	0.16064	994.1	9.3	1001	11	961	15	1001	11	0.694095	Single Age
12WPY32_46	183	1.082	5.14	0.16	0.3256	0.0081	0.96622	1841	27	1815	40	1845.4	9.3	1845.4	9.3	1.64734	Single Age
12WPY32_47	232.1	4.53	1.0106	0.0087	0.11768	0.00091	0.4462	709	4.4	717.2	5.2	670.3	8.2	717.2	5.2	1.15656	Single Age
12WPY32_48	141	0.76	6.404	0.078	0.3746	0.0037	0.82772	2033	11	2051	17	2018.1	5.3	2018.1	5.3	1.63025	Single Age
12WPY32_49	489	2.09	1.115	0.013	0.1292	0.0016	0.22663	760.4	6.1	783.1	8.9	705.5	8.8	783.1	8.9	2.98527	Single Age
12WPY32_50	81.2	0.632	10.84	0.12	0.4479	0.0053	0.90952	2511	11	2385	24	2599.3	7.4	2599.3	7.4	8.24453	Single Age
12WPY32_51	273.7	3.66	3.459	0.049	0.2326	0.0025	0.82464	1517	11	1348	13	1758.2	7.8	1758.2	7.8	23.3307	Single Age
12WPY32_52	209	0.947	1.362	0.015	0.1462	0.0013	0.45974	872.4	6.4	879.8	7.1	834	13	879.8	7.1	0.848235	Single Age
12WPY32_53	144	3.36	1.846	0.027	0.1827	0.0017	0.65683	1061.4	9.6	1081.6	9.2	1014.5	9.9	1081.6	9.2	1.90315	Single Age
12WPY32_54	260	3.66	1.0072	0.0095	0.11749	0.00097	0.55121	707.9	4.9	716.1	5.6	693.3	7.3	716.1	5.6	1.15836	Single Age
12WPY32_55	124	1.554	0.8488	0.0096	0.1025	0.00081	0.43624	624.4	5.4	629.6	4.8	616	11	629.6	4.8	0.832799	Single Age
12WPY32_56	231	1.188	1.221	0.016	0.1377	0.0018	0.75399	811	7.7	831.5	9.9	760.5	9.5	831.5	9.9	2.52774	Single Age
12WPY32_58	203.2	1.436	1.889	0.019	0.1868	0.0018	0.62704	1076.8	6.6	1104.1	9.6	1042.2	7.7	1104.1	9.6	2.53529	Single Age
12WPY32_59	275	1.331	6.114	0.099	0.3507	0.0043	0.87837	1993	14	1937	20	2046.1	5.4	2046.1	5.4	5.3321	Single Age
12WPY32_60	160.2	0.0902	1.049	0.036	0.10061	0.00097	0.48476	726	17	617.9	5.7	1099	50	DISC	DISC	14.8898	Single Age
12WPY32_62	227.7	0.3367	0.675	0.013	0.0785	0.0011	0.56961	524.9	7.4	487.1	6.6	626	17	487.1	6.6	7.20137	Single Age
12WPY32_63	222	0.826	1.609	0.022	0.1636	0.0018	0.75948	973.3	8.7	976.8	9.8	971.9	8.7	976.8	9.8	0.359601	Single Age
12WPY32_64	66.2	0.493	4.045	0.038	0.2525	0.0036	0.70562	1643	7.6	1451	18	1828	11	1828	11	20.6236	Single Age
12WPY32_65	1001	1.687	1.546	0.018	0.1394	0.001	0.30159	948.6	7.3	841.4	5.8	1251	14	DISC	DISC	11.3009	Single Age
12WPY32_66	170.1	1.365	1.119	0.011	0.12615	0.00095	0.50118	762.1	5.3	765.8	5.4	763.8	9.3	765.8	5.4	0.485501	Single Age
12WPY32_67	405.5	2.561	8.5	0.24	0.3717	0.0065	0.93309	2291	23	2037	31	2475	19	2475	19	17.697	Single Age
12WPY32_68	44.5	2.393	1.115	0.02	0.1263	0.0017	0.61041	761.2	9.4	766.4	9.7	716	19	766.4	9.7	0.683132	Single Age
12WPY32_69	24.03	0.2927	6.701	0.068	0.3805	0.0034	0.54863	2071.9	9	2078	16	2050.3	8.3	2050.3	8.3	1.35102	Single Age
12WPY32_70	57.4	0.903	1.189	0.044	0.1299	0.0032	0.89159	792	21	787	19	822	21	787	19	0.631313	Single Age
12WPY32_71	125.9	1.007	1.693	0.019	0.1703	0.0014	0.60712	1006.3	7.3	1013.8	7.9	965.5	9.1	1013.8	7.9	0.745305	Single Age
12WPY32_72	135	10.5	1.051	0.041	0.1207	0.003	0.92348	726	20	734	18	694	26	734	18	1.10193	Single Age
12WPY32_73	96	0.693	12.7	0.16	0.5129	0.0067	0.83724	2656	12	2668	28	2640.3	5.6	2640.3	5.6	1.04912	Single Age
12WPY32_74	291	0.903	6.166	0.043	0.3628	0.004	0.85226	1999.4	6	1995	19	1994.5	5.6	1994.5	5.6	0.0250689	Single Age
12WPY32_75	130.6	1.08	1.017	0.013	0.1155	0.0012	0.38007	712.2	6.4	704.6	6.7	678	13	704.6	6.7	1.06712	Single Age
12WPY32_77	106.1	0.692	1.706	0.018	0.1684	0.0014	0.50442	1010.3	7	1003.2	8	1018.6	8.7	1003.2	8	0.702762	Single Age
12WPY32_78	381	0.581	6.016	0.076	0.3584	0.0044	0.82056	1978	11	1974	21	1942.2	9.9	1942.2	9.9	1.63732	Single Age
12WPY32_79	194.2	1.502	0.8116	0.0061	0.09731	0.00086	0.52973	603.8	3.3	598.6	5.1	584	11	598.6	5.1	0.861212	Single Age
12WPY32_80	589	1.605	8.44	0.1	0.3162	0.0052	0.80438	2283	11	1770	25	2699	13	DISC	DISC	34.4202	Single Age
12WPY32_81	68.4	0.772	1.898	0.019	0.1847	0.0018	0.5376	1080	6.8	1092.6	9.7	1018	11	1092.6	9.7	1.16667	Single Age
12WPY32_82	67.4	1.233	1.396	0.028	0.146	0.0013	0.40559	886	12	878.7	7.5	866	34	878.7	7.5	0.823928	Single Age
12WPY32_83	452	2.71	0.793	0.0063	0.09804	0.00083	0.48547	592.8	3.6	602.9	4.9	536.4	7.9	602.9	4.9	1.70378	Single Age
12WPY32_84	69.4	0.7727	5.634	0.046	0.3386	0.003	0.56786	1920.9	7	1880	14	1957	6.7	1957	6.7	3.93459	Single Age
12WPY32_85	55	0.865	1.69	0.027	0.1718	0.0025	0.76089	1005	10	1022	14	944	14	1022	14	1.69154	Single Age
12WPY32_86	105.7	1.279	9.17	0.17	0.4236	0.0064	0.93957	2353	17	2276	29	2392	10	2392	10	4.8495	Single Age
12WPY32_87	114.2	0.764	1.743	0.027	0.1712	0.0021	0.5718	1024.3	9.8	1019	11	1013	21	1019	11	0.517427	Single Age
12WPY32_88	99.1	1.484	2.013	0.04	0.1827	0.0015	0.16313	1118	13	1081.8	7.9	1190	34	1081.8	7.9	3.23792	Single Age
12WPY32_89	419	10.3	0.662	0.026	0.0821	0.0026	0.97261	514	16	508	16	553	12	508	16	1.16732	Single Age
12WPY32_90	122.3	0.642	0.956	0.011	0.1037	0.0013	0.58327	680.9	5.7	636.3	7.3	721	11	636.3	7.3	6.55015	Single Age
12WPY32_91	335	0.591	0.843	0.013	0.1009	0.0014	0.82081	621.6	6.9	619.7	8.2	658.9	8.6	619.7	8.2	0.305663	Single Age
12WPY32_92	96	1.234	1.784	0.019	0.1737	0.0023	0.55878	1039.2	7.1	1032	13	1053	11	1032	13	0.692841	Single Age
12WPY32_93	43.4	0.929	0.886	0.016	0.10592	0.00079	0.21327	643.6	8.7	649	4.6	643	25	649	4.6	0.83903	Single Age
12WPY32_94	165	0.771	1.0366	0.0095	0.1192	0.0011	0.34888	722	4.7	726.8	6.5	718	11	726.8	6.5	0.66482	Single Age
12WPY32_95	77	0.811	1.797	0.019	0.1753	0.0017	0.27269	1045.1	6.7	1041	9.5	1053	13	1041	9.5	0.392307	Single Age
12WPY32_96	94.5	79.5	0.918	0.014	0.1086	0.0012	0.22825	660.9	7.2	664.7	7.2	687	15	664.7	7.2	0.574974	Single Age
12WPY32_97	199.1	0.7705	5.937	0.092	0.3593	0.0044	0.78979	1972	13	1978	21	1971	9.2	1971	9.2	0.35515	Single Age
12WPY32_98	156.2	0.47	0.849	0.014	0.101	0.0015	0.82962	624.4	7.7	620.2	8.5	647	11	620.2	8.5	0.672646	Single Age
12WPY32_99	62.8	0.927	1.482	0.022	0.1499	0.0021	0.78022	923.6	8.9	900	12	977	11	900	12	2.55522	Single Age
12WPY32_100	103	0.82	1.19	0.011	0.1318	0.0016	0.69468	795.6	5.3	797.9	9.2	801	11	797.9	9.2	0.28909	Single Age
12WPY32_101	80.6	2.056	1.923	0.023	0.1895	0.0018	0.59941	1088.7	7.9	1118.6	9.7	1034	11	1118.6	9.7	2.74639	Single Age
12WPY32_102	288	31.2	5.948	0.073	0.3491	0.0046	0.78002	1967	11	1933	23	1983.8	6.9	1983.8	6.9	2.56074	Single Age
12WPY32_103	26.4	0.37	1.859	0.036	0.1803	0.0019	0.41368	1067	13	1068	11	1062	24	1068	11	0.0937207	Single Age
12WPY32_104	55.6	0.649	1.269	0.026	0.1437	0.0024	0.81998	831	12	865	14	739	10	865	14	4.09146	Single Age
12WPY32_105	401	0.983	5.87	0.12	0.3462	0.0053	0.94954	1955	19	1916	26	1984.5	7.8	1984.5	7.8	3.45175	Single Age
12WPY32_106	91.9	0.627	1.88	0.023	0.1867	0.0026	0.63391	1073.5	8.1	1103	14	996	13	1103	14	2.74802	Single Age
12WPY32_107	133.7	0.689	6.291	0.05	0.3733	0.0025	0.48262	2016.8	6.9	2045	12	1977.5	6.5	1977.5	6.5	3.4134	Single Age
12WPY32_108	72	1.79	1.506	0.048	0.1547	0.0031	0.9052	929	20	927	17	933	23	927	17	0.215285	Single Age
12WPY32_109	392	0.71	13.62	0.17	0.5158	0.0047	0.35071	2723	12	2681	20	2733	20	2733	20	1.90267	Single Age
12WPY32_110	611	0.98	0.8344	0.0084	0.1015	0.001	0.65975	615.9	4.7	623.4	5.9	583	12	623.4	5.9	1.21773	Single Age
12WPY32_111	228.7	0.682	5.139	0.087	0.3166	0.0055	0.80886	1843	14	1776	26	1907	11	1907	11	6.86943	Single Age
12WPY32_112	181	1.068	1.621	0.017	0.1627	0.0015	0.58076	978.2	6.6	971.6	8.4	990	11	971.6	8.4	0.674709	Single Age
12WPY32_113	123.5	0.828	5.943	0.059	0.349	0.0026	0.57718	1966.9	8.7	1931	13	2012.6	6.6	2012.6	6.6	4.05446	Single Age
12WPY32_114	405.5	4.35	1.024	0.019	0.1193	0.0016	0.88745	716.1	9.3	726.3	9.1	685.8	8	726.3	9.1	1.42438	Single Age
12WPY32_115	179.4	1.025	0.9599	0.0097	0.11208	0.00097	0.3367	683	5	684.8	5.6	659	13	684.8	5.6	0.263543	Single Age
12WPY32_116	110.5	0.814	12.37	0.11	0.502	0.0045	0.51621	2632.3	8.1	2622	19	2609.7	7.7	2609.7	7.7	0.471319	Single Age
12WPY32_117	420	1.03	1.563	0.033	0.1462	0.0029	0.94071	954	13	879	16	1046	7.3	879	16	7.86164	Single Age
12WPY32_118	68.4	3.19	1.011	0.02	0.1144	0.0016	0.66196	710.3	9.8	698.3	9.3	756	17	698.3	9.3	1.68943	Single Age
12WPY32_119	229	3.34	0.873	0.011	0.1055	0.0013	0.59208	637.3	5.6	646.7	7.3	597	12	646.7	7.3	1.47497	Single Age
12WPY32_120	19	1.13	1.745	0.03	0.1688	0.002	0.33419	1024	11	1005	11	1069	18	1005	11	1.85547	Single Age
12WPY32_121	620	1.953	0.938	0.027	0.1119	0.0025	0.95011	670	14	683	14	617	11	683	14	1.9403	Single Age
12WPY32_122	189	0.739	0.905	0.015	0.1084	0.0014	0.72295	654.1	7.9	663.7	8	652	11	663.7	8	1.46767	Single Age
12WPY32_123	438	3.54	0.7772	0.007	0.0966	0.00075	0.48588	583.7	4	594.5	4.4	543.3	8	594.5	4.4	1.85027	Single Age
12WPY32_124	119	1.021	0.826	0.014	0.09949	0.00098	0.55321	611	7.9	611.4	5.7	596	17	611.4	5.7	0.0654664	Single Age
12WPY33_1	140	0.594	0.815	0.02	0.09387	0.00088	0.10138	607	11	578.4	5.2	694	43	578.4	5.2	4.7117	Single Age
12WPY33_2	315	13.7	1.521	0.015	0.1519	0.0013	0.78668	938.8	6.1	911.6	7.3	994.3	8.7	911.6	7.3	2.89732	Single Age
12WPY33_3	80.6	1.108	1.624	0.014	0.1612	0.001	0.43514	980.2	5.2	963.6	5.7	1021	11	963.6	5.7	1.69353	Single Age
12WPY33_4	285	1.208	0.9062	0.0059	0.10614	0.00062	0.60945	654.9	3.2	650.2	3.6	672.7	7.1	650.2	3.6	0.717667	Single Age
12WPY33_5	218	1.141	0.9631	0.0088	0.10779	0.00083	0.63509	684.7	4.6	659.8	4.8	764	8.2	659.8	4.8	3.63663	Single Age
12WPY33_6	387	4.16	0.791	0.013	0.0929	0.0011	0.75364	591.5	7.4	572.8	6.5	665	17	572.8	6.5	3.16145	Single Age
12WPY33_7	139	1.34	5.24	0.11	0.3016	0.0059	0.96537	1857	18	1698	29	2038.3	6.6	2038.3	6.6	16.6953	Single Age
12WPY33_8	214	0.93	0.6188	0.006	0.07704	0.00065	0.54883	488.9	3.8	478.4	3.9	527	12	478.4	3.9	2.14768	Single Age
12WPY33_9	441	1.796	6.465	0.05	0.3501	0.0033	0.89097	2040.8	6.8	1935	16	2148.5	4.8	2148.5	4.8	9.93717	Single Age
12WPY33_10	271	1.347	0.815	0.013	0.096	0.00089	0.026366	602.9	6.3	590.9	5.2	662	19	590.9	5.2	1.99038	Single Age
12WPY33_11	140.4	0.775	1.505	0.012	0.1499	0.0011	0.51729	932.4	4.8	900.5	6.3	1004.3	7.8	900.5	6.3	3.42128	Single Age
12WPY33_12	201	1	1.511	0.012	0.1528	0.0012	0.73105	935.3	5.1	916.8	6.8	974.5	9	916.8	6.8	1.97797	Single Age
12WPY33_13	10.5	0.882	1.06	0.048	0.0746	0.0032	0.49657	729	24	463	19	1722	53	DISC	DISC	36.4883	Single Age
12WPY33_14	294	1.68	1.281	0.048	0.1342	0.004	0.9813	834	22	811	23	899	17	811	23	2.75779	Single Age
12WPY33_15	96	2.6	2.723	0.076	0.1669	0.0028	0.72022	1333	21	995	16	1891	23	DISC	DISC	25.3563	Single Age
12WPY33_16	305.8	6.47	0.792	0.012	0.0931	0.0014	0.9092	592	7.1	573.8	8.4	660.5	7.5	573.8	8.4	3.07432	Single Age
12WPY33_17	251	2.44	1.707	0.025	0.1698	0.0024	0.93019	1010.1	9.4	1011	13	1005.1	8.8	1011	13	0.0891001	Single Age
12WPY33_18	937	3.483	4.312	0.084	0.2647	0.0051	0.97401	1695	16	1519	24	1909.7	7	1909.7	7	20.4587	Single Age
12WPY33_19	266	2.66	1.411	0.011	0.1452	0.0012	0.7163	893.3	4.6	874	7	938	9.4	874	7	2.16053	Single Age
12WPY33_20	416	2.29	0.9515	0.007	0.10864	0.00099	0.70109	679.2	3.6	664.8	5.7	722.5	6.1	664.8	5.7	2.12014	Single Age
12WPY33_21	95.4	1.768	10.48	0.25	0.4359	0.0084	0.98755	2468	27	2330	38	2590	13	2590	13	10.0386	Single Age
12WPY33_22	156	1.162	4.345	0.036	0.2831	0.0022	0.77706	1701.6	6.9	1607	11	1811.5	6.4	1811.5	6.4	11.289	Single Age
12WPY33_23	1016	10.5	14.57	0.27	0.4886	0.0068	0.96623	2786	18	2564	30	2953.7	9.3	2953.7	9.3	13.1936	Single Age
12WPY33_24	287	1.61	1.185	0.011	0.126	0.0013	0.8088	793.2	5.3	765.1	7.4	877.5	6.9	765.1	7.4	3.54261	Single Age
12WPY33_25	494	0.848	0.7949	0.0091	0.0925	0.0013	0.75887	593.9	5.1	570.2	7.9	688	13	570.2	7.9	3.99057	Single Age
12WPY33_26	56.5	1.253	10.28	0.36	0.417	0.013	0.96173	2454	34	2251	57	2629	15	2629	15	14.3781	Single Age
12WPY33_27	455	1.63	1.026	0.026	0.1151	0.0022	0.95667	717	13	702	13	776	16	702	13	2.09205	Single Age
12WPY33_28	417	5.2	0.923	0.019	0.1047	0.0016	0.89744	663	10	641.5	9.3	745	15	641.5	9.3	3.24284	Single Age
12WPY33_29	290	2.61	0.8456	0.0093	0.10019	0.00087	0.70221	622	5.1	615.5	5.1	644.9	7.9	615.5	5.1	1.04502	Single Age
12WPY33_30	134.8	0.99	3.618	0.091	0.2496	0.0048	0.9488	1552	20	1436	25	1718	14	1718	14	16.4144	Single Age
12WPY33_31	603.8	0.736	8.444	0.084	0.3553	0.003	0.79392	2279.5	9.1	1960	14	2585.2	7.7	2585.2	7.7	24.1838	Single Age
12WPY33_32	190	1.16	0.996	0.012	0.114	0.0015	0.76929	701.4	5.9	696	8.7	728	12	696	8.7	0.769889	Single Age
12WPY33_33	94.9	2.31	1.134	0.016	0.1252	0.0015	0.63769	770.2	7.6	760.2	8.4	797	14	760.2	8.4	1.29836	Single Age
12WPY33_34	130.9	35.4	0.847	0.033	0.0958	0.0011	0.64475	629	19	589.6	6.5	771	64	589.6	6.5	6.26391	Single Age
12WPY33_35	1570	3.82	0.7301	0.0065	0.08835	0.00082	0.85323	557	3.9	545.7	4.9	601.2	5.9	545.7	4.9	2.02873	Single Age
12WPY33_36	163	2.63	0.8891	0.0071	0.1049	0.001	0.45508	645.7	3.8	643.2	5.9	663	14	643.2	5.9	0.387177	Single Age
12WPY33_37	343	9.6	1.094	0.047	0.123	0.0043	0.97497	748	22	747	24	734	15	747	24	0.13369	Single Age
12WPY33_38	395	3.015	0.8272	0.0069	0.0981	0.00066	0.78994	612.4	3.8	603.3	3.9	645.3	6.9	603.3	3.9	1.48596	Single Age
12WPY33_39	77.2	0.454	6.136	0.044	0.3481	0.0027	0.68734	1995	6.2	1925	13	2076.1	6.5	2076.1	6.5	7.27807	Single Age
12WPY33_40	107.3	1.419	0.827	0.012	0.09734	0.00083	0.060546	611.6	6.8	598.8	4.9	653	21	598.8	4.9	2.09287	Single Age
12WPY33_41	630	3.109	0.805	0.011	0.0941	0.0014	0.9265	599.2	6.1	579.4	8	666.2	5.8	579.4	8	3.30441	Single Age
12WPY33_42	590	3.98	1.795	0.044	0.1636	0.0025	0.75091	1044	16	976	14	1183	31	976	14	6.51341	Single Age
12WPY33_43	130.1	1.256	4.824	0.082	0.2953	0.0053	0.64912	1787	14	1667	26	1941	16	1941	16	14.1164	Single Age
12WPY33_44	129.8	0.812	1.585	0.016	0.1567	0.0014	0.91351	964	6.4	938.4	7.8	1020.1	7.4	938.4	7.8	2.6556	Single Age
12WPY33_45	459	0.971	0.7916	0.0058	0.09398	0.00061	0.73334	592.4	3.2	579	3.6	645.2	5.9	579	3.6	2.26199	Single Age
12WPY33_46	420	1.806	0.7422	0.0073	0.09074	0.00092	0.78342	563.5	4.2	559.9	5.4	574.8	6.1	559.9	5.4	0.638864	Single Age
12WPY33_47	167.3	0.699	1.0802	0.0099	0.1104	0.0011	0.71191	743.6	4.9	674.8	6.5	942.1	8.6	674.8	6.5	9.25229	Single Age
12WPY33_48	119	1.46	8.179	0.092	0.3495	0.0032	0.73526	2251	10	1932	15	2556.3	9.7	2556.3	9.7	24.422	Single Age
12WPY33_49	142.5	1.002	0.8001	0.008	0.09522	0.00091	0.59498	597.4	4.4	586.3	5.4	631	11	586.3	5.4	1.85805	Single Age
12WPY33_50	270	4.92	1.039	0.02	0.1167	0.0019	0.90709	722	10	711	11	739	11	711	11	1.52355	Single Age
12WPY33_51	219.8	0.769	0.778	0.015	0.089	0.0018	0.22953	584	8.4	550	11	731	27	550	11	5.82192	Single Age
12WPY33_52	522	11.5	1.4508	0.009	0.1437	0.001	0.87098	909.1	4.2	865.4	5.8	1008	11	865.4	5.8	4.80695	Single Age
12WPY33_53	154.3	1.354	0.8659	0.0084	0.09883	0.00085	0.67433	633.1	4.6	607.5	5	723.4	8.9	607.5	5	4.0436	Single Age
12WPY33_54	809.3	1.185	1.0044	0.0093	0.1133	0.001	0.90344	705.8	4.7	692.1	6	743.9	5.1	692.1	6	1.94106	Single Age
12WPY33_55	47.6	14.9	0.85	0.03	0.0908	0.003	0.58544	624	17	560	18	836	40	DISC	DISC	10.2564	Rim
12WPY33_55	110	1.159	1.349	0.017	0.1412	0.0015	0.66172	866.9	7.3	851.2	8.2	904	10	851.2	8.2	1.81105	Core
12WPY33_56	236.8	2.986	0.6215	0.0046	0.07789	0.00065	0.68682	490.7	2.9	483.5	3.9	524.9	9.1	483.5	3.9	1.46729	Single Age
12WPY33_57	1101	2.861	5.015	0.039	0.3095	0.0031	0.82886	1821.6	6.6	1738	15	1915.1	5.5	1915.1	5.5	9.24756	Single Age
12WPY33_58	102.8	0.457	1.69	0.013	0.166	0.0012	0.37115	1004.6	5.1	989.9	6.7	1030.6	8	989.9	6.7	1.46327	Single Age
12WPY33_59	243	0.774	1.5621	0.0092	0.15822	0.00098	0.64616	955.6	3.6	946.8	5.5	977.4	7.3	946.8	5.5	0.920887	Single Age
12WPY33_60	56.1	0.634	1.346	0.02	0.1413	0.0015	0.32431	865.5	8.8	852.2	8.3	885	16	852.2	8.3	1.53668	Single Age
12WPY33_61	386	1.64	1.441	0.014	0.1484	0.0013	0.88621	905.9	5.8	891.7	7.5	936.9	4.9	891.7	7.5	1.5675	Single Age
12WPY33_62	1594	2.123	7.46	0.058	0.3797	0.0033	0.90228	2167.7	7	2074	15	2255.9	4.2	2255.9	4.2	8.0633	Single Age
12WPY33_63	46.82	1.018	1.493	0.023	0.1487	0.0017	0.46426	927.1	9.5	893.8	9.6	1006	13	893.8	9.6	3.59185	Single Age
12WPY33_64	35.2	1.444	1.42	0.032	0.1437	0.0017	0.10169	898	13	865.6	9.7	972	40	865.6	9.7	3.60802	Single Age
12WPY33_65	218.8	1.025	1.324	0.012	0.1372	0.0011	0.66442	857.3	5.2	828.5	6	927.2	9.7	828.5	6	3.35938	Single Age
12WPY33_66	162.1	3.6	11.71	0.12	0.47	0.0045	0.76581	2580.6	9.9	2486	19	2658	9.2	2658	9.2	6.47103	Single Age
12WPY33_67	337	2.89	6.486	0.074	0.353	0.0052	0.88283	2044	10	1952	24	2134.9	9.4	2134.9	9.4	8.56715	Single Age
12WPY33_68	250	1.37	1.555	0.023	0.1568	0.0019	0.86129	952	9	939	10	978.4	7.6	939	10	1.36555	Single Age
12WPY33_69	237	1.412	2.067	0.028	0.1862	0.0021	0.82991	1139.1	8.9	1101	12	1208.2	9.2	1101	12	3.34475	Single Age
12WPY33_70	178	1.248	0.6878	0.0057	0.08447	0.00054	0.25821	531.4	3.4	522.7	3.2	570	15	522.7	3.2	1.63718	Single Age
12WPY33_71	341	3.23	2.66	0.028	0.2221	0.0026	0.92004	1317.9	7.6	1295	14	1359.7	4.8	1359.7	4.8	4.7584	Single Age
12WPY33_72	87.4	1.253	5.115	0.045	0.3187	0.0027	0.71435	1838.1	7.4	1783	13	1898.7	6.7	1898.7	6.7	6.09364	Single Age
12WPY33_74	541	20.4	0.8491	0.0078	0.09918	0.0007	0.3717	624.1	4.3	609.6	4.1	681.9	9.9	609.6	4.1	2.32335	Single Age
12WPY33_75	232.6	2.77	1.655	0.061	0.1655	0.0055	0.9859	986	24	986	30	972	15	986	30	0	Single Age
12WPY33_76	976	3.111	0.6506	0.004	0.0795	0.00043	0.70602	508.8	2.4	493.1	2.6	567.6	5.4	493.1	2.6	3.08569	Single Age
12WPY33_77	171.9	1.766	6.002	0.028	0.3387	0.002	0.4857	1976	4.1	1880.5	9.4	2074.4	5.2	2074.4	5.2	9.34728	Single Age
12WPY33_78	324	1.77	10.07	0.13	0.4129	0.0052	0.71324	2440	12	2228	24	2627	13	2627	13	15.1884	Single Age
12WPY33_79	388.1	54	0.8123	0.0056	0.09599	0.00067	0.71333	604	3.2	590.9	3.9	650.8	6.7	590.9	3.9	2.16887	Single Age
12WPY33_80	127.8	0.952	1.666	0.023	0.1625	0.002	0.8168	994.9	8.8	972	11	1036.9	8.9	972	11	2.30174	Single Age
12WPY33_81	132.9	4.548	0.8262	0.0082	0.09763	0.00089	0.47547	611.3	4.6	600.4	5.2	647	12	600.4	5.2	1.78309	Single Age
12WPY33_82	114	1.19	0.879	0.029	0.1056	0.0028	0.73663	640	16	647	16	624	16	647	16	1.09375	Rim
12WPY33_82	89.4	1.415	11.38	0.25	0.4201	0.0079	0.94085	2553	21	2260	36	2792.1	9.6	2792.1	9.6	19.0573	Core
12WPY33_83	61.9	0.699	1.622	0.044	0.1535	0.0022	0.72773	976	16	922	13	1088	29	922	13	5.53279	Single Age
12WPY33_84	116.6	1.3	10.25	0.14	0.4407	0.006	0.9275	2458	12	2353	27	2537	4.8	2537	4.8	7.25266	Single Age
12WPY33_85	48.3	1.064	1.625	0.02	0.1581	0.0015	0.40635	979.3	7.8	945.9	8.5	1053	16	945.9	8.5	3.4106	Single Age
12WPY33_86	89.8	0.829	0.914	0.026	0.09896	0.00071	0.25848	657	13	608.3	4.2	830	55	608.3	4.2	7.41248	Single Age
12WPY33_87	119.5	0.687	2.736	0.024	0.2188	0.002	0.71789	1337.8	6.6	1276	10	1426.5	8.5	1426.5	8.5	10.5503	Single Age
12WPY33_88	135	1.46	0.7334	0.0078	0.09041	0.00077	0.61408	559	4.5	557.9	4.6	558	12	557.9	4.6	0.19678	Single Age
12WPY33_89	412	7.35	1.04	0.044	0.1137	0.0033	0.97515	721	22	694	19	799	31	694	19	3.7448	Single Age
12WPY33_90	557	2.65	1.479	0.032	0.1466	0.0031	0.78955	921	13	882	17	1018	17	882	17	4.23453	Single Age
12WPY33_91	96.8	1.02	6.127	0.076	0.3477	0.004	0.86793	1994	11	1923	19	2064	5.7	2064	5.7	6.8314	Single Age
12WPY33_92	37.8	0.585	1.541	0.044	0.1501	0.0041	0.66505	944	17	901	23	1050	25	901	23	4.55508	Single Age
12WPY33_93	95	1.069	0.922	0.0091	0.10745	0.00077	0.2635	663.2	4.8	657.9	4.5	677	15	657.9	4.5	0.799156	Single Age
12WPY33_94	336	4.08	1.687	0.014	0.1666	0.0012	0.80807	1004.8	5.3	993.5	6.7	1026.6	6.9	993.5	6.7	1.1246	Single Age
12WPY33_95	421	2.15	0.95	0.015	0.1094	0.0016	0.80108	677.8	7.6	669.3	9.4	690	12	669.3	9.4	1.25406	Single Age
12WPY33_96	43.2	0.734	5.592	0.048	0.3335	0.0025	0.23337	1915.3	7.2	1855	12	1975.9	9.7	1975.9	9.7	6.11873	Single Age
12WPY33_97	274.5	12.99	0.6644	0.0056	0.08171	0.00057	0.59156	517.2	3.4	506.3	3.4	555.1	7.7	506.3	3.4	2.1075	Single Age
12WPY33_98	161	0.614	0.8662	0.0097	0.10066	0.00084	0.45846	633.2	5.3	618.2	4.9	679	16	618.2	4.9	2.36892	Single Age
12WPY33_99	187	0.791	1.515	0.023	0.1488	0.002	0.73437	936	9.3	894	11	1030	12	894	11	4.48718	Single Age
12WPY33_100	119.6	1.041	1.452	0.015	0.148	0.0015	0.66264	910.5	6.3	889.8	8.2	954.2	7.6	889.8	8.2	2.27348	Single Age
12WPY33_101	479	6.95	1.018	0.017	0.1157	0.0018	0.93683	712	8.6	706	10	724.2	7.7	706	10	0.842697	Single Age
12WPY33_102	68.8	1	1.773	0.027	0.1738	0.0024	0.48558	1037.1	9.3	1033	13	1021	18	1033	13	0.395333	Single Age
12WPY33_103	601	2.04	1.84	0.015	0.1744	0.0015	0.81172	1059.7	5.2	1036.2	8	1100.7	4.9	1036.2	8	2.21761	Single Age
12WPY33_104	52.1	0.537	1.413	0.02	0.1454	0.0015	0.40734	893.9	8.4	875.3	8.4	931	17	875.3	8.4	2.08077	Single Age
12WPY33_105	84.4	1.06	0.902	0.012	0.10651	0.00097	0.4931	652.7	6.4	652.4	5.6	662	16	652.4	5.6	0.0459629	Single Age
12WPY33_106	178.7	0.8121	4.535	0.026	0.2888	0.002	0.59081	1737.1	4.9	1635.7	9.8	1860.3	6	1860.3	6	12.0733	Single Age
12WPY33_107	870	2.29	0.951	0.04	0.0944	0.0012	0.10686	676	21	581.5	6.9	975	84	DISC	DISC	13.9793	Single Age
12WPY33_108	313	1.453	1.5301	0.0087	0.15406	0.0009	0.61667	942.9	3.4	923.7	5	989.4	7.4	923.7	5	2.03627	Single Age
12WPY33_109	17.8	1.679	1.425	0.029	0.1419	0.0019	0.50405	898	12	855	11	1006	17	855	11	4.78842	Single Age
12WPY33_110	429	1.809	0.7084	0.0091	0.086	0.001	0.71863	543.5	5.4	531.7	5.9	589.1	9.2	531.7	5.9	2.17111	Single Age
12WPY33_111	306	1.139	1.52	0.017	0.1481	0.0016	0.89178	939	6.9	890.2	9.1	1050.2	6.9	890.2	9.1	5.19702	Single Age
12WPY33_112	675	2.36	0.825	0.0074	0.09588	0.00086	0.56271	610.8	4.1	590.2	5	682	12	590.2	5	3.37263	Single Age
12WPY33_113	171.2	0.85	0.854	0.019	0.09771	0.00075	0.66175	626	10	600.9	4.4	720	34	600.9	4.4	4.00958	Single Age
12WPY33_114	108.5	1.058	9.47	0.1	0.4202	0.0048	0.84355	2383.6	9.7	2261	22	2490.7	5.7	2490.7	5.7	9.22231	Single Age
12WPY33_115	183.1	1.893	0.8471	0.0087	0.09971	0.00073	0.41903	621.7	4.3	612.7	4.3	658	16	612.7	4.3	1.44764	Single Age
12WPY33_116	185	1.26	9.63	0.13	0.3954	0.0062	0.64802	2399	12	2147	28	2606	13	2606	13	17.6132	Single Age
12WPY33_118	183	13.6	0.837	0.012	0.09795	0.00099	0.75552	617.7	6.8	602.3	5.8	671	14	602.3	5.8	2.49312	Single Age
12WPY33_119	103.9	3.02	11.99	0.27	0.491	0.013	0.94709	2602	21	2572	56	2628	8.9	2628	8.9	2.1309	Single Age
12WPY33_120	63.1	1.093	8.772	0.094	0.3959	0.0037	0.76699	2314	9.7	2153	18	2457	5.8	2457	5.8	12.3728	Single Age
12WPY35_1	552.1	9.88	1.007	0.012	0.1161	0.0012	0.80327	707.1	6.1	707.8	7.1	716	12	707.8	7.1	0.0989959	Single Age
12WPY35_2	160.9	0.322	0.832	0.01	0.09731	0.00099	0.41658	614.6	5.6	598.6	5.8	679	21	598.6	5.8	2.60332	Single Age
12WPY35_3	854	1.31	0.9501	0.0067	0.10945	0.00088	0.7203	678	3.5	669.5	5.1	701.9	8.7	669.5	5.1	1.25369	Single Age
12WPY35_4	221	0.702	0.9051	0.0075	0.10499	0.00078	0.35419	654.3	4	643.6	4.6	686	12	643.6	4.6	1.63534	Single Age
12WPY35_5	949	1.705	1.2614	0.0082	0.1369	0.001	0.74537	828.4	3.7	827.3	5.8	828.3	5	827.3	5.8	0.132786	Single Age
12WPY35_6	83.6	0.406	1.805	0.035	0.1768	0.0037	0.85365	1050	13	1049	21	1064	13	1049	21	0.0952381	Single Age
12WPY35_7	576	4.1	0.8623	0.0095	0.1002	0.0011	0.80429	631.7	5.2	615.6	6.2	677.9	7	615.6	6.2	2.54868	Single Age
12WPY35_8	353	1.56	1.018	0.011	0.1145	0.0012	0.8219	712.6	5.5	698.7	6.8	756.7	9	698.7	6.8	1.9506	Single Age
12WPY35_9	370	1.159	5.25	0.23	0.292	0.013	0.98886	1854	39	1648	64	2096.2	7.5	2096.2	7.5	21.3815	Single Age
12WPY35_10	542	0.8	0.787	0.025	0.0946	0.0033	0.9637	588	14	582	19	614	17	582	19	1.02041	Single Age
12WPY35_11	296	3.86	0.8156	0.0078	0.09607	0.00093	0.67262	605.4	4.4	591.3	5.5	654.4	9	591.3	5.5	2.32904	Single Age
12WPY35_12	587	6.41	0.858	0.01	0.0999	0.0013	0.84861	628.7	5.6	613.7	7.3	676.3	8.4	613.7	7.3	2.38588	Single Age
12WPY35_13	19.6	0.763	0.979	0.019	0.1104	0.0014	0.22735	692.1	9.8	674.7	8.4	747	21	674.7	8.4	2.51409	Single Age
12WPY35_14	425.3	1.668	0.843	0.0093	0.09801	0.00086	0.7004	620.5	5.1	602.7	5	680	11	602.7	5	2.86865	Single Age
12WPY35_16	626	2.03	0.872	0.015	0.101	0.0016	0.86206	635.8	8.3	620.3	9.5	719	13	620.3	9.5	2.43787	Single Age
12WPY35_17	327	1.804	18.74	0.58	0.559	0.011	0.93241	3021	30	2867	48	3133	20	3133	20	8.49026	Single Age
12WPY35_18	291.2	5.38	5.41	0.21	0.2626	0.0077	0.9728	1890	31	1508	38	2334	17	DISC	DISC	35.3899	Single Age
12WPY35_19	292	14.4	5.87	0.15	0.3321	0.0056	0.90451	1952	22	1847	27	2064	18	2064	18	10.5136	Single Age
12WPY35_20	482	1.289	6.55	0.11	0.3538	0.0052	0.94248	2051	15	1952	25	2155.8	5.4	2155.8	5.4	9.45357	Single Age
12WPY35_21	298	0.537	0.9464	0.0082	0.11116	0.00087	0.6688	676.1	4.3	679.4	5	663.5	9.6	679.4	5	0.488093	Single Age
12WPY35_22	155.9	4.03	1.019	0.011	0.11594	0.00079	0.47548	713.2	5.7	707.1	4.6	736	10	707.1	4.6	0.8553	Single Age
12WPY35_23	84	0.416	0.909	0.021	0.1093	0.0024	0.8764	657	11	668	14	622	15	668	14	1.67428	Single Age
12WPY35_24	129.2	1.885	10.51	0.19	0.4404	0.0075	0.93312	2480	17	2351	34	2599.3	6.1	2599.3	6.1	9.55257	Single Age
12WPY35_25	426	2.29	2.541	0.042	0.18	0.0024	0.89066	1284	12	1067	13	1670.1	9	DISC	DISC	16.9003	Single Age
12WPY35_26	655	21.5	3.561	0.067	0.2344	0.0035	0.85641	1542	15	1357	18	1809	12	1809	12	24.9862	Single Age
12WPY35_28	357	1.546	4.859	0.055	0.2907	0.0031	0.82249	1794.7	9.5	1645	16	1977.3	7.2	1977.3	7.2	16.8057	Single Age
12WPY35_29	15.7	1.83	10.46	0.19	0.4344	0.0063	0.76388	2474	17	2325	28	2604	12	2604	12	10.7143	Single Age
12WPY35_30	88.6	1.23	0.861	0.012	0.1022	0.0011	0.2293	630.3	6.8	627.4	6.5	633	19	627.4	6.5	0.460098	Single Age
12WPY35_31	459.4	0.748	3.659	0.06	0.2351	0.0036	0.85593	1563	13	1361	19	1847	11	1847	11	26.3129	Single Age
12WPY35_32	594.4	29.6	4.862	0.063	0.3057	0.0028	0.78457	1796	11	1719	14	1887	11	1887	11	8.90302	Single Age
12WPY35_33	662	14.5	0.8481	0.009	0.1002	0.0012	0.82434	623.4	4.9	615.3	6.8	658.1	7.7	615.3	6.8	1.29933	Single Age
12WPY35_34	473	2.03	0.7599	0.007	0.09138	0.00086	0.5336	573.8	4	563.7	5.1	626	11	563.7	5.1	1.7602	Single Age
12WPY35_35	327	2.09	1.214	0.011	0.1319	0.0013	0.74101	806.8	4.9	798.4	7.7	828.8	7.9	798.4	7.7	1.04115	Single Age
12WPY35_36	295	7.4	0.8715	0.0095	0.10427	0.0009	0.59722	636.2	5.1	639.4	5.3	648	13	639.4	5.3	0.502986	Single Age
12WPY35_37	294	1.568	5.27	0.13	0.3056	0.0072	0.96725	1860	22	1721	35	2031.9	7.8	2031.9	7.8	15.3009	Single Age
12WPY35_38	34.1	0.7821	1.243	0.024	0.1315	0.0019	0.62504	821	11	796	11	889	22	796	11	3.04507	Single Age
12WPY35_39	229.9	0.814	0.6726	0.0056	0.0842	0.00063	0.47698	522.2	3.4	521.1	3.7	542	11	521.1	3.7	0.210647	Single Age
12WPY35_40	1026	1.95	1.154	0.087	0.1152	0.0018	0.98093	770	30	703	10	946	67	703	10	8.7013	Single Age
12WPY35_41	296	2.19	0.888	0.023	0.1048	0.0021	0.53861	645	12	642	12	669	18	642	12	0.465116	Single Age
12WPY35_42	90	1.57	1.374	0.046	0.1457	0.0029	0.44175	877	20	879	16	921	25	879	16	0.22805	Single Age
12WPY35_43	770	3.007	0.9286	0.0096	0.1068	0.001	0.65737	668.2	5.3	653.9	6	721	12	653.9	6	2.14008	Single Age
12WPY35_44	225.9	1.276	1.482	0.021	0.1495	0.0018	0.71445	923.7	8.6	898	10	984	11	898	10	2.78229	Single Age
12WPY35_45	299	1.511	0.9518	0.0092	0.1106	0.0011	0.50933	679.4	4.8	676.1	6.6	679	13	676.1	6.6	0.485723	Single Age
12WPY35_46	209	9.6	1.072	0.03	0.1218	0.0029	0.9435	739	15	740	17	742	12	740	17	0.135318	Single Age
12WPY35_47	228	1.405	1.0695	0.0083	0.1212	0.0011	0.56987	738.3	4	738.1	6.2	757.7	9.9	738.1	6.2	0.0270893	Single Age
12WPY35_48	650	2.56	6.07	0.11	0.3314	0.0062	0.90511	1985	16	1845	30	2133.4	6.8	2133.4	6.8	13.5183	Single Age
12WPY35_49	295.5	8.18	4.36	0.14	0.274	0.0067	0.91527	1709	25	1560	34	1899	15	1899	15	17.8515	Single Age
12WPY35_50	33.1	0.845	1.03	0.035	0.1184	0.0031	0.54263	716	17	721	18	734	31	721	18	0.698324	Single Age
12WPY35_51	299	0.756	1.37	0.016	0.14	0.0014	0.66516	876	7	844.8	8.1	957	14	844.8	8.1	3.56164	Single Age
12WPY35_52	654	1.478	1.463	0.014	0.1495	0.0014	0.80833	914.9	5.9	897.9	7.6	953.1	4.8	897.9	7.6	1.85813	Single Age
12WPY35_53	286	11	3.95	0.057	0.2581	0.0028	0.7831	1623	12	1480	14	1808	13	1808	13	18.1416	Single Age
12WPY35_54	187.4	2.34	1.175	0.011	0.1269	0.0011	0.43927	788.6	4.9	769.9	6.2	840	12	769.9	6.2	2.37129	Single Age
12WPY35_55	211.4	0.678	0.7886	0.0077	0.0947	0.00092	0.42077	590.7	4.5	583.2	5.4	612	16	583.2	5.4	1.26968	Single Age
12WPY35_56	320	3.218	11.395	0.091	0.4712	0.0042	0.76946	2556.5	7.6	2488	18	2608.9	6.8	2608.9	6.8	4.63414	Single Age
12WPY35_57	260	5.4	1.127	0.038	0.1257	0.0033	0.96383	765	18	763	19	773	15	763	19	0.261438	Single Age
12WPY35_58	327	0.73	0.8602	0.0066	0.10127	0.00083	0.61644	630.1	3.6	621.8	4.9	656.3	9	621.8	4.9	1.31725	Single Age
12WPY35_59	172	8.5	0.801	0.011	0.0966	0.0013	0.70709	597.1	6.1	595.2	7.3	617	11	595.2	7.3	0.318205	Single Age
12WPY35_60	83.8	2.508	1.112	0.015	0.1228	0.0012	0.40905	760.3	6.8	746.4	6.9	801	17	746.4	6.9	1.82823	Single Age
12WPY35_61	394	3.35	1.082	0.06	0.1188	0.0057	0.98809	736	29	722	33	792	17	722	33	1.90217	Single Age
12WPY35_62	1712	40.6	0.8569	0.0046	0.10017	0.00058	0.65775	628.3	2.5	615.4	3.4	675.6	7.1	615.4	3.4	2.05316	Single Age
12WPY35_63	543	7.9	3.36	0.13	0.2295	0.0059	0.97549	1498	30	1331	31	1726	26	1726	26	22.8853	Single Age
12WPY35_64	182	2.21	1.46	0.018	0.1484	0.0017	0.6082	914.8	7	892	9.8	973	14	892	9.8	2.49235	Single Age
12WPY35_65	2070	25.65	0.7369	0.0072	0.08727	0.00091	0.70876	560.5	4.2	539.4	5.4	642	10	539.4	5.4	3.7645	Single Age
12WPY35_66	81	1.58	6.56	0.13	0.3003	0.0055	0.79593	2052	17	1692	27	2443	13	DISC	DISC	30.7409	Single Age
12WPY35_67	187.1	1.278	2.783	0.082	0.206	0.0055	0.73645	1353	21	1212	28	1606	27	1606	27	24.533	Single Age
12WPY35_68	129.6	1.751	5.341	0.039	0.3229	0.0024	0.49646	1875.8	6.1	1804	12	1955.5	8.4	1955.5	8.4	7.74738	Single Age
12WPY35_69	289	3.64	4.78	0.15	0.2533	0.0061	0.89004	1779	26	1455	31	2183	20	DISC	DISC	33.3486	Single Age
12WPY35_70	299	1.462	2.269	0.081	0.1601	0.002	0.81941	1198	26	957	11	1660	48	DISC	DISC	20.1169	Single Age
12WPY35_71	126	0.776	0.659	0.011	0.083	0.001	0.50286	516.2	6.6	514	6.1	545	19	514	6.1	0.426191	Single Age
12WPY35_72	68.5	0.584	0.873	0.016	0.1041	0.0018	0.65044	637.8	8.8	638	11	647	20	638	11	0.0313578	Single Age
12WPY35_73	102.4	0.739	1.775	0.022	0.1745	0.002	0.57599	1035.6	8	1037	11	1055	13	1037	11	0.135187	Single Age
12WPY35_74	339	3.14	1.061	0.01	0.1194	0.0012	0.6237	733.9	5.1	727.3	7.2	764	11	727.3	7.2	0.899305	Single Age
12WPY35_75	156	1.808	5.605	0.071	0.3391	0.004	0.73328	1916	11	1882	19	1945.9	9.3	1945.9	9.3	3.28383	Single Age
12WPY35_76	503	1.058	0.886	0.029	0.1031	0.0033	0.96384	644	16	632	19	688	11	632	19	1.86335	Single Age
12WPY35_77	90.2	1.02	1.083	0.081	0.1204	0.0063	0.97794	730	39	731	36	723	50	731	36	0.136986	Single Age
12WPY35_78	446	2.75	0.7617	0.0063	0.09328	0.00084	0.7015	574.8	3.6	574.9	5	566	8.6	574.9	5	0.0173974	Single Age
12WPY35_79	126	0.77	0.819	0.01	0.0988	0.0013	0.31442	607.4	5.7	607.2	7.8	597	25	607.2	7.8	0.0329272	Single Age
12WPY35_80	65.2	0.4236	1.447	0.027	0.1457	0.0017	0.54337	910	11	876.5	9.8	964	20	876.5	9.8	3.68132	Single Age
12WPY35_81	97.5	1.353	1.222	0.013	0.1338	0.0012	0.56827	810.3	5.8	809.6	6.6	809	12	809.6	6.6	0.0863878	Single Age
12WPY35_82	83.5	0.949	4.883	0.096	0.3105	0.0072	0.86235	1797	17	1747	36	1870	13	1870	13	6.57754	Single Age
12WPY35_83	467	2.33	1.405	0.015	0.143	0.0012	0.77262	891.7	6.2	861.4	6.9	955.9	7.3	861.4	6.9	3.398	Single Age
12WPY35_84	640	2.09	0.76	0.014	0.0909	0.0019	0.9358	574.3	8.3	561	11	636.8	7.5	561	11	2.31586	Single Age
12WPY35_85	243	0.501	0.8717	0.0093	0.09993	0.00096	0.59789	636.3	5.1	614	5.6	703	12	614	5.6	3.50464	Single Age
12WPY35_86	126.4	1.395	1.262	0.021	0.1347	0.0019	0.72576	827.9	9.3	815	11	874	15	815	11	1.55816	Single Age
12WPY35_87	67.8	0.783	5.346	0.056	0.3254	0.0033	0.60393	1875.7	8.9	1816	16	1934	11	1934	11	6.10134	Single Age
12WPY35_88	195	2.792	1.653	0.013	0.1623	0.0013	0.5455	990.4	4.8	969.3	7.1	1027.6	8.2	969.3	7.1	2.13045	Single Age
12WPY35_89	218	0.681	9.85	0.14	0.4071	0.0055	0.90698	2419	13	2201	25	2607	7.2	2607	7.2	15.5735	Single Age
12WPY35_90	252.3	1.153	1.762	0.018	0.1703	0.0017	0.53978	1032.3	6.4	1013.6	9.3	1063	13	1013.6	9.3	1.81149	Single Age
12WPY35_91	126.1	1.627	1.604	0.027	0.1574	0.0027	0.84739	971	11	942	15	1034.1	9.9	942	15	2.98661	Single Age
12WPY35_92	540	0.476	0.92	0.01	0.1048	0.0011	0.80014	662	5.4	642.6	6.2	722	11	642.6	6.2	2.93051	Single Age
12WPY35_93	339	4.2	1.802	0.041	0.1743	0.003	0.89613	1044	15	1035	17	1070	15	1035	17	0.862069	Single Age
12WPY35_94	209	3.02	11.76	0.24	0.49	0.012	0.9047	2584	19	2567	53	2585	13	2585	13	0.696325	Single Age
12WPY35_95	355.2	0.947	1.622	0.022	0.16	0.0024	0.63625	980.1	8.3	957	13	1025	16	957	13	2.3569	Single Age
12WPY35_96	263	1.005	7.945	0.049	0.3669	0.0027	0.49796	2225.3	5.8	2016	12	2431.8	6.7	2431.8	6.7	17.0984	Single Age
12WPY35_97	154	180	0.825	0.013	0.09576	0.00099	0.50405	610.7	7	589.5	5.8	692	18	589.5	5.8	3.47143	Single Age
12WPY35_98	252.8	2.51	0.8593	0.0097	0.101	0.0011	0.52066	629.5	5.3	620.3	6.4	655	16	620.3	6.4	1.46148	Single Age
12WPY35_99	175	0.692	5.414	0.069	0.3264	0.004	0.80232	1887	11	1820	20	1953	14	1953	14	6.81004	Single Age
12WPY35_100	493	2.84	3.329	0.057	0.2322	0.0046	0.81193	1487	13	1345	24	1667	17	1667	17	19.3161	Single Age
12WPY35_101	182	2.97	5.155	0.065	0.3149	0.0044	0.80906	1846	10	1764	22	1939.7	8.6	1939.7	8.6	9.0581	Single Age
12WPY35_102	34.7	3.82	6.66	0.24	0.3369	0.0076	0.8916	2062	32	1871	36	2262	28	2262	28	17.2856	Single Age
12WPY35_103	680	4.84	0.895	0.027	0.1068	0.0034	0.95494	648	15	654	20	630	11	654	20	0.925926	Single Age
12WPY35_104	158	2.67	1.043	0.017	0.1169	0.0019	0.2346	727.2	9.1	713	11	776	24	713	11	1.9527	Single Age
12WPY35_105	340	3.94	0.8616	0.0091	0.1022	0.0012	0.80526	630.7	5	627	7.2	651	11	627	7.2	0.58665	Single Age
12WPY35_106	204.5	1.2	0.91	0.014	0.1047	0.0014	0.62446	656.8	7.5	642.1	8.2	721	17	642.1	8.2	2.23812	Single Age
12WPY35_107	238	7.89	0.829	0.009	0.0994	0.0011	0.5565	612.9	5	610.8	6.3	624	14	610.8	6.3	0.342633	Single Age
12WPY35_108	186	2.74	0.978	0.013	0.1145	0.0013	0.68162	693	6.6	698.5	7.7	681	13	698.5	7.7	0.793651	Single Age
12WPY35_109	148.2	0.77	5.074	0.059	0.3193	0.0039	0.83742	1835.4	9.4	1786	19	1888.4	6.2	1888.4	6.2	5.42258	Single Age
12WPY35_110	113.2	0.6131	1.785	0.024	0.1744	0.0022	0.67517	1039.6	8.6	1036	12	1048.2	9	1036	12	0.346287	Single Age
12WPY35_111	62	0.396	4.866	0.062	0.3131	0.0038	0.70009	1796	11	1756	19	1847	10	1847	10	4.92691	Single Age
12WPY35_113	63.5	0.776	1.353	0.067	0.1322	0.0061	0.92775	869	30	799	35	1037	23	799	35	8.05524	Single Age
12WPY35_114	221.1	1.66	0.8433	0.0083	0.09929	0.00078	0.5722	620.8	4.6	610.2	4.6	650.8	9.9	610.2	4.6	1.70747	Single Age
12WPY35_115	28.44	1.262	0.635	0.018	0.078	0.0018	0.32435	501	11	484	11	602	33	484	11	3.39321	Single Age
12WPY35_116	219	0.832	0.81	0.012	0.097	0.0012	0.64682	602.8	6.7	596.8	6.9	597	15	596.8	6.9	0.995355	Single Age
12WPY35_117	165	1.464	1.644	0.017	0.1624	0.0012	0.39821	987	6.5	970	6.8	1034	15	970	6.8	1.72239	Single Age
12WPY35_118	986	6.09	0.906	0.012	0.1028	0.0012	0.92942	654.8	6.5	630.9	6.8	733.1	6.1	630.9	6.8	3.64997	Single Age
12WPY35_119	196	1.106	1.762	0.024	0.1691	0.0022	0.8486	1030.7	8.9	1007	12	1069.6	9	1007	12	2.29941	Single Age
12WPY35_120	215	2.06	1.2725	0.0095	0.13699	0.00084	0.52776	833.3	4.3	827.6	4.7	847.5	9	827.6	4.7	0.684027	Single Age
12WPY35_121	115.4	1.48	1.385	0.021	0.1433	0.002	0.73102	883.6	9.3	863	11	929	12	863	11	2.33137	Single Age
12WPY35_122	450	0.845	0.764	0.016	0.0929	0.0018	0.91366	575.3	9.1	572	10	591	12	572	10	0.573614	Single Age
12WPY35_123	220	2.83	1.027	0.012	0.1171	0.0013	0.67078	717.8	5.9	713.7	7.5	719	12	713.7	7.5	0.57119	Single Age
12WPY35_124	1780	54.3	0.8291	0.0055	0.09677	0.00089	0.71544	613	3.1	595.4	5.2	685	9.5	595.4	5.2	2.87113	Single Age
12WPY35_125	134.1	1.503	1.487	0.012	0.1535	0.0013	0.46106	924.9	4.9	920.3	7.5	939	11	920.3	7.5	0.497351	Single Age
12WPY36_1	997	1.707	0.921	0.0074	0.1037	0.0011	0.4163	662.8	3.9	636.1	6.4	755	17	636.1	6.4	4.02836	Rim
12WPY36_1	486	1.751	1.037	0.034	0.1122	0.0036	0.44468	722	17	685	21	839	58	685	21	5.12465	Core
12WPY36_2	86	1.18	1.535	0.025	0.1572	0.0023	0.68745	944.9	9.8	942	13	956	15	942	13	0.306911	Single Age
12WPY36_3	813	26.9	0.797	0.015	0.0916	0.0019	0.58799	594.9	8.6	565	11	711	26	565	11	5.02605	Single Age
12WPY36_4	183.9	1.892	0.97	0.012	0.113	0.0011	0.28411	687.9	6.1	689.9	6.2	669	11	689.9	6.2	0.29074	Single Age
12WPY36_5	1106	6.55	0.883	0.016	0.0998	0.0017	0.68095	642.2	8.7	613	9.8	755	22	613	9.8	4.54687	Rim
12WPY36_5	615	2.387	1.28	0.029	0.127	0.0032	0.79558	837	13	771	18	1012	20	771	18	7.8853	Rim
12WPY36_5	300.3	1.785	1.753	0.035	0.1724	0.0036	0.8503	1028	13	1025	20	1058	19	1025	20	0.291829	Core
12WPY36_6	198.1	1.809	1.12	0.018	0.1244	0.0015	0.39472	762.9	8.5	756	8.7	764	28	756	8.7	0.904444	Single Age
12WPY36_7	144	1.69	7.06	0.18	0.3885	0.0083	0.97112	2114	25	2114	39	2110	16	2110	16	0.189573	Single Age
12WPY36_8	219.7	1.699	7.02	0.09	0.3777	0.0046	0.84336	2116	11	2065	21	2171.8	6.9	2171.8	6.9	4.91758	Single Age
12WPY36_9	355	1.183	1.573	0.022	0.1578	0.0022	0.72347	959.3	8.5	945	12	983	10	945	12	1.49067	Single Age
12WPY36_10	160.8	1.183	23.37	0.32	0.6392	0.0081	0.8739	3241	13	3184	32	3271	5	3271	5	2.65974	Single Age
12WPY36_11	195	0.882	4.829	0.059	0.3127	0.0051	0.81561	1790	10	1753	25	1895	12	1895	12	7.4934	Single Age
12WPY36_12	540	34.4	0.838	0.024	0.102	0.011	0.94768	618	13	624	64	604	16	DISC	DISC	0.970874	Rim
12WPY36_12	277.2	5.261	6.932	0.099	0.3242	0.0035	0.64642	2103	13	1816	19	2391	14	2391	14	24.0485	Core
12WPY36_13	230	1.99	5.881	0.053	0.3535	0.003	0.71843	1957.9	7.9	1951	14	1971.6	8.1	1971.6	8.1	1.04484	Single Age
12WPY36_14	2120	38.3	0.6453	0.0055	0.07781	0.00076	0.77409	505.5	3.4	483	4.6	697.7	7.9	483	4.6	4.45104	Single Age
12WPY36_16	217	0.575	0.7875	0.0077	0.09665	0.00099	0.52378	589.6	4.4	594.7	5.8	576	12	594.7	5.8	0.864993	Single Age
12WPY36_17	442.1	0.553	1.556	0.036	0.1534	0.0027	0.55027	952	15	920	15	1054	32	920	15	3.36134	Single Age
12WPY36_18	47.9	0.6197	0.9	0.012	0.1073	0.0012	0.34953	651.2	6.4	656.9	7	623	17	656.9	7	0.875307	Single Age
12WPY36_19	45.4	0.769	1.513	0.023	0.1547	0.0014	0.080681	934.9	9.2	927	8	947	19	927	8	0.84501	Single Age
12WPY36_20	243	2.42	1.591	0.025	0.1634	0.0029	0.78576	966.6	9.9	976	16	953	14	976	16	0.972481	Rim
12WPY36_20	96.1	0.881	2.872	0.043	0.2333	0.004	0.72164	1374	11	1351	21	1402	15	1402	15	3.63766	Core
12WPY36_21	25.07	0.1895	0.923	0.017	0.1067	0.0016	0.43248	664.7	9.3	653.3	9.2	698	24	653.3	9.2	1.71506	Single Age
12WPY36_22	193	0.659	0.893	0.015	0.1064	0.0016	0.5779	647.9	8	651.6	9.5	635	13	651.6	9.5	0.571076	Single Age
12WPY36_23	271	0.755	0.7164	0.0077	0.08918	0.00085	0.72611	548.3	4.6	550.7	5	537	10	550.7	5	0.437717	Single Age
12WPY36_24	303	2.11	9.17	0.13	0.4141	0.0068	0.7594	2355	13	2233	31	2466	13	2466	13	9.4485	Single Age
12WPY36_25	555	2.2	1.004	0.015	0.1141	0.0022	0.87112	705.2	7.6	696	13	752	10	696	13	1.30459	Single Age
12WPY36_26	218	1.32	0.893	0.012	0.1043	0.0014	0.56849	647.6	6.2	639.6	8.1	666	12	639.6	8.1	1.23533	Single Age
12WPY36_27	97	0.909	0.778	0.011	0.0947	0.0014	0.41785	584	6.1	583.4	8.5	578	14	583.4	8.5	0.10274	Single Age
12WPY36_28	300	3.89	0.967	0.012	0.1135	0.0013	0.68424	686.7	6	692.8	7.8	670	12	692.8	7.8	0.888306	Single Age
12WPY36_29	1205	180	0.8445	0.0078	0.0983	0.0011	0.73044	621.5	4.3	604.1	6.3	686	12	604.1	6.3	2.79968	Rim
12WPY36_29	358	1.597	1.596	0.018	0.1592	0.0026	0.55544	968.6	7	952	15	997	19	952	15	1.71381	Core
12WPY36_30	356.8	20.7	4.695	0.06	0.3011	0.0031	0.61252	1766	11	1696	16	1842	18	1842	18	7.92617	Single Age
12WPY36_31	63	0.854	1.829	0.027	0.1793	0.0019	0.49271	1055.1	9.5	1063	11	1039	20	1063	11	0.748744	Single Age
12WPY36_32	555	1.96	2.661	0.04	0.2196	0.0032	0.70324	1317	11	1282	17	1389	16	1389	16	7.70338	Rim
12WPY36_32	464	2.072	2.873	0.039	0.2351	0.0034	0.6854	1375	10	1361	18	1398	13	1398	13	2.64664	Core
12WPY36_33	682.4	0.727	1.461	0.012	0.1458	0.0015	0.71992	914.2	5	877.1	8.4	1009.8	7.2	877.1	8.4	4.05819	Rim
12WPY36_33	63.7	0.786	1.919	0.043	0.1931	0.0038	0.63484	1087	15	1138	20	990	22	1138	20	4.69181	Core
12WPY36_34	84.8	1.43	1.635	0.027	0.1639	0.003	0.65874	984	10	978	16	997	18	978	16	0.609756	Single Age
12WPY36_35	715	8.63	0.849	0.035	0.098	0.0039	0.67561	624	19	602	23	723	51	602	23	3.52564	Rim
12WPY36_35	495	2.682	1.407	0.022	0.1452	0.0031	0.87718	891.8	9.3	874	18	933	16	874	18	1.99596	Core
12WPY36_36	176	0.65	1.764	0.059	0.1747	0.0021	0.6455	1024	17	1038	12	1038	44	1038	12	1.36719	Single Age
12WPY36_37	522	3.061	6.38	0.1	0.355	0.0084	0.90378	2029	14	1958	40	2108	11	2108	11	7.11575	Single Age
12WPY36_38	104	1.169	1.606	0.027	0.165	0.0024	0.58405	973	10	985	13	949	17	985	13	1.2333	Single Age
12WPY36_39	126.2	0.4438	1.259	0.012	0.1365	0.0011	0.44651	827	5.5	825	6.2	837	13	825	6.2	0.241838	Single Age
12WPY36_40	275.7	1.831	3.164	0.05	0.2103	0.0029	0.53151	1448	12	1230	15	1780	12	DISC	DISC	30.8989	Single Age
12WPY36_41	369	24.6	0.948	0.011	0.1091	0.0012	0.66202	676.7	5.5	668.3	7.2	692	14	668.3	7.2	1.24132	Single Age
12WPY36_42	242.9	0.714	12.963	0.083	0.5135	0.0035	0.6774	2676.7	6	2671	15	2684.8	5.7	2684.8	5.7	0.514005	Single Age
12WPY36_43	329	8.48	0.688	0.019	0.08551	0.00088	0.021793	531	11	528.9	5.3	619	29	528.9	5.3	0.39548	Rim
12WPY36_43	232.4	1.409	1.751	0.02	0.1767	0.0018	0.43203	1027.4	7.4	1049	10	958	19	1049	10	2.10239	Core
12WPY36_44	359	5.81	1.548	0.018	0.1517	0.002	0.77736	949.5	7.1	910	11	1027	11	910	11	4.16008	Single Age
12WPY36_45	247	0.941	1.68	0.019	0.1666	0.002	0.71871	1001.4	6.8	993	11	1017	12	993	11	0.838826	Single Age
12WPY36_46	149	0.94	0.696	0.01	0.087	0.0011	0.62712	537.3	6.1	537.5	6.5	534	17	537.5	6.5	0.0372232	Single Age
12WPY36_47	243.5	0.976	1.599	0.015	0.1616	0.0015	0.63157	969.5	6	965.4	8.2	974	12	965.4	8.2	0.422898	Single Age
12WPY36_48	469	1.762	0.863	0.014	0.1023	0.0019	0.90767	631.3	7.7	628	11	638.9	8.7	628	11	0.522731	Single Age
12WPY36_49	1074	0.759	0.6894	0.009	0.0829	0.001	0.5945	532.3	5.4	513.6	6.2	621	12	513.6	6.2	3.51306	Rim
12WPY36_49	411	0.6898	0.789	0.013	0.0949	0.0016	0.76047	592.6	7.8	584.6	9.4	613	19	584.6	9.4	1.34998	Core
12WPY36_50	111.2	2.74	0.982	0.017	0.1151	0.0016	0.70847	695.4	8.7	702.3	9.1	673	14	702.3	9.1	0.992235	Single Age
12WPY36_51	105	2.345	9.7	0.19	0.4011	0.0059	0.11982	2406	18	2174	27	2600	33	2600	33	16.3846	Single Age
12WPY36_52	85.2	0.82	5.253	0.043	0.3334	0.0029	0.67866	1860.8	6.9	1854	14	1873.4	8.8	1873.4	8.8	1.03555	Single Age
12WPY36_53	94	0.571	5.099	0.072	0.3281	0.0053	0.6794	1836	12	1829	26	1854	13	1854	13	1.34844	Rim
12WPY36_53	115.2	1.09	15.08	0.57	0.5381	0.0073	0.60517	2817	36	2775	31	2843	50	2843	50	2.39184	Core
12WPY36_54	782	11.6	0.886	0.038	0.1034	0.0042	0.80667	644	20	634	25	684	66	634	25	1.5528	Rim
12WPY36_54	314	0.835	1.364	0.018	0.1442	0.002	0.65141	873.2	7.8	868	12	874	17	868	12	0.595511	Core
12WPY36_55	264	3.19	0.7757	0.0082	0.09393	0.00097	0.75275	582.9	4.7	578.7	5.7	640	10	578.7	5.7	0.720535	Single Age
12WPY36_56	244.4	1.445	1.706	0.013	0.1706	0.0019	0.37283	1010.4	4.8	1015	10	996	16	1015	10	0.455265	Single Age
12WPY36_57	279	0.764	0.91	0.011	0.1085	0.0012	0.78346	657.5	6	663.7	6.9	636	12	663.7	6.9	0.942966	Single Age
12WPY36_58	165	0.724	6.739	0.089	0.3822	0.005	0.73176	2076	12	2086	23	2083.2	6.9	2083.2	6.9	0.134409	Single Age
12WPY36_59	816	6.49	1.186	0.027	0.123	0.0025	0.53865	796	12	747	14	932	28	747	14	6.15578	Rim
12WPY36_59	704	6.27	1.323	0.025	0.1386	0.003	0.77536	856	11	836	17	896	21	836	17	2.33645	Core
12WPY36_60	238.9	2.456	0.9246	0.0078	0.10774	0.00089	0.55246	665.2	4.2	659.6	5.2	686.8	9.7	659.6	5.2	0.841852	Single Age
12WPY36_61	428	2.98	1.145	0.031	0.1267	0.0039	0.76738	774	14	769	22	768	19	769	22	0.645995	Rim
12WPY36_61	169.5	0.868	1.43	0.036	0.1427	0.0027	0.49063	901	15	860	16	979	21	860	16	4.5505	Core
12WPY36_62	114.3	1.33	1.603	0.017	0.1617	0.0018	0.65945	971.1	6.8	966	10	989.2	9.5	966	10	0.525178	Single Age
12WPY36_63	811	3.7	0.775	0.01	0.0894	0.0011	0.79425	582.3	6	552	6.5	717	12	552	6.5	5.2035	Single Age
12WPY36_64	169	0.984	1.896	0.025	0.186	0.0026	0.64803	1079.3	8.7	1101	14	1048	15	1101	14	2.01056	Single Age
12WPY36_65	254	0.659	0.923	0.01	0.1097	0.001	0.8645	663.6	5.4	670.9	5.9	645	9.9	670.9	5.9	1.10006	Single Age
12WPY36_66	365	17.1	1.04	0.02	0.122	0.0018	0.78935	723.6	9.7	742	10	697	13	742	10	2.54284	Rim
12WPY36_66	299	0.88	1.312	0.023	0.1444	0.0027	0.84596	850.8	9.9	870	15	802	12	870	15	2.2567	Core
12WPY36_67	123.4	0.6036	5.393	0.034	0.3401	0.0022	0.76717	1883.4	5.4	1887	11	1880.7	6.1	1880.7	6.1	0.334982	Single Age
12WPY36_68	352	0.392	0.848	0.012	0.1013	0.0015	0.86711	623	6.8	621.9	8.8	628	10	621.9	8.8	0.176565	Single Age
12WPY36_69	313	1.23	1.755	0.03	0.1733	0.0039	0.18139	1029	11	1030	21	1041	24	1030	21	0.0971817	Single Age
12WPY36_70	146.8	1.859	14.41	0.14	0.5322	0.0059	0.74334	2776.4	8.9	2754	24	2800.7	7.2	2800.7	7.2	1.66744	Single Age
12WPY36_71	1484	39.1	0.6297	0.0047	0.0773	0.00074	0.70491	495.9	2.9	480	4.5	579.8	8.4	480	4.5	3.20629	Single Age
12WPY36_72	154.8	0.581	1.624	0.018	0.1632	0.0015	0.60519	979	6.8	974.5	8.3	976	15	974.5	8.3	0.459653	Single Age
12WPY36_73	209.6	1.084	4.389	0.099	0.2777	0.0057	0.89408	1712	18	1579	29	1877	11	1877	11	15.8764	Single Age
12WPY36_74	145	0.36	12.633	0.086	0.5031	0.0039	0.6708	2652.3	6.4	2627	17	2665.8	8.4	2665.8	8.4	1.45547	Single Age
12WPY36_75	590	67.8	1.486	0.037	0.1515	0.0042	0.91429	924	15	909	24	968	14	909	24	1.62338	Rim
12WPY36_75	143.1	1.557	4.49	0.11	0.2615	0.0055	0.77083	1729	20	1497	28	2063	29	2063	29	27.4358	Core
12WPY36_76	259	2.6	1.671	0.021	0.1632	0.0019	0.46354	998.8	7.7	974	11	1042	12	974	11	2.48298	Single Age
12WPY36_77	159.5	0.812	1.875	0.016	0.182	0.0015	0.61751	1072	5.5	1077.6	8.4	1070.7	9	1077.6	8.4	0.522388	Single Age
12WPY36_78	35.73	2.5	6.55	0.17	0.3047	0.0048	0.74538	2051	23	1714	24	2430	21	2430	21	29.465	Single Age
12WPY36_79	127	0.604	1.914	0.016	0.1829	0.0018	0.61239	1085.8	5.7	1083	10	1077	11	1083	10	0.257874	Single Age
12WPY36_80	1127	0.852	1.094	0.012	0.1198	0.0015	0.63241	751.2	5.4	729.3	8.4	827	14	729.3	8.4	2.91534	Rim
12WPY36_80	426	0.609	1.223	0.023	0.1347	0.0021	0.8855	811	11	815	12	796	15	815	12	0.493218	Core
12WPY36_81	1090	69	5.33	0.25	0.3323	0.0057	0.039201	1869	40	1849	28	1887	86	1887	86	2.01378	Rim
12WPY36_81	240	1.32	13.13	0.2	0.522	0.0081	0.88209	2688	14	2707	34	2671.5	7.3	2671.5	7.3	1.32884	Core
12WPY36_82	267	0.82	1.467	0.016	0.1489	0.0017	0.68751	916.5	6.4	894.6	9.5	969	13	894.6	9.5	2.38953	Single Age
12WPY36_83	43.5	19.4	0.903	0.027	0.1075	0.0024	0.65239	652	14	658	14	654	27	658	14	0.920245	Rim
12WPY36_83	54.2	1.382	9.25	0.26	0.405	0.011	0.84602	2362	25	2190	51	2505	13	2505	13	12.5749	Core
12WPY36_84	212	1.17	1.266	0.014	0.1361	0.0013	0.68682	830.2	6.3	823.6	6.9	847.1	8.5	823.6	6.9	0.794989	Single Age
12WPY36_86	72.7	1.289	4.905	0.054	0.3049	0.0033	0.71792	1802.3	9.3	1715	16	1912.1	9.7	1912.1	9.7	10.308	Single Age
12WPY36_87	279	1.18	11.42	0.11	0.4827	0.0051	0.73156	2557.8	9.4	2539	22	2583.6	8.5	2583.6	8.5	1.72627	Single Age
12WPY36_88	382	1.72	1.597	0.026	0.1638	0.0029	0.89514	968	10	978	16	942.9	8.8	978	16	1.03306	Single Age
12WPY36_89	1605	1.35	0.6158	0.0098	0.0754	0.0012	0.72924	487.1	6.2	468.5	7.1	572	14	468.5	7.1	3.81852	Single Age
12WPY36_90	148.7	0.84	0.972	0.01	0.1132	0.0012	0.46918	689	5.4	691.3	6.9	691	15	691.3	6.9	0.333817	Single Age
12WPY36_91	129	1.453	1.716	0.073	0.1625	0.0032	0.61296	1008	26	970	18	1102	49	970	18	3.76984	Single Age
12WPY36_92	484	6.45	0.953	0.012	0.11	0.0016	0.8568	679.5	6.3	672.7	9.2	708.9	8.2	672.7	9.2	1.00074	Single Age
12WPY36_93	362	4.9	1.16	0.048	0.1284	0.0057	0.94372	781	23	778	33	781	18	778	33	0.384123	Rim
12WPY36_93	128.5	0.625	1.428	0.016	0.1506	0.0015	0.28812	901.5	7	904.4	8.6	900	20	904.4	8.6	0.321686	Core
12WPY36_94	294	1.841	1.065	0.011	0.1195	0.0011	0.54074	736	5.5	727.6	6.6	740	14	727.6	6.6	1.1413	Single Age
12WPY36_95	137.6	3.25	0.804	0.049	0.0975	0.0047	0.93131	597	28	599	28	670	30	599	28	0.335008	Single Age
12WPY36_96	1701	9.42	1.862	0.038	0.1436	0.0031	0.90519	1066	13	865	17	1618	10	DISC	DISC	18.8555	Single Age
12WPY36_98	143	1.798	1.274	0.018	0.1412	0.0023	0.64618	833.7	8.1	851	13	796	13	851	13	2.07509	Single Age
12WPY36_99	236	2.14	0.975	0.017	0.1125	0.0018	0.81656	690.5	8.8	689	11	703	13	689	11	0.217234	Single Age
12WPY36_100	1520	32.6	0.621	0.012	0.0745	0.0015	0.78052	490.5	7.4	463.4	8.8	638	17	463.4	8.8	5.52497	Rim
12WPY36_100	162.8	3.24	1.396	0.086	0.1433	0.0039	0.39	883	35	863	22	1020	130	863	22	2.26501	Core
12WPY36_101	146	1.171	4.71	0.053	0.3134	0.0036	0.79901	1768.4	9.4	1757	17	1786.7	6.9	1786.7	6.9	1.66228	Single Age
12WPY36_102	118.5	0.996	1.553	0.016	0.1572	0.0016	0.62001	952.3	6.6	941.3	8.7	990.5	9.7	941.3	8.7	1.1551	Single Age
12WPY36_103	368	1.098	0.8853	0.0088	0.1046	0.0011	0.72732	643.6	4.8	641.3	6.2	651	10	641.3	6.2	0.357365	Single Age
12WPY36_104	298.1	2.65	0.926	0.012	0.1088	0.002	0.42192	665.5	6.5	666	12	677	17	666	12	0.0751315	Rim
12WPY36_104	200.6	0.618	1.647	0.031	0.1649	0.0032	0.66354	988	12	984	18	995	25	984	18	0.404858	Core
12WPY36_105	244	0.599	12.56	0.14	0.5026	0.0056	0.84778	2646	11	2630	24	2656.8	5	2656.8	5	1.00873	Single Age
12WPY36_106	375	1.545	1.0965	0.0076	0.1238	0.0011	0.58508	751.5	3.7	752.1	6.5	755.9	8.8	752.1	6.5	0.0798403	Single Age
12WPY36_107	81	1.001	1.82	0.018	0.177	0.0016	0.47952	1052.4	6.5	1050.3	8.9	1050	11	1050.3	8.9	0.199544	Single Age
12WPY36_108	288	2.116	0.957	0.013	0.111	0.0013	0.75468	681.3	6.6	678.6	7.5	690.6	9.9	678.6	7.5	0.396301	Single Age
12WPY36_109	373	1.211	6.195	0.052	0.3642	0.0032	0.82455	2003.3	7.3	2004	16	2001.7	6.1	2001.7	6.1	0.114902	Single Age
12WPY36_110	303	14.9	1.633	0.06	0.1636	0.0057	0.9396	982	23	976	32	1014	11	976	32	0.610998	Rim
12WPY36_110	166.4	0.3516	3.166	0.053	0.2522	0.0046	0.60743	1449	13	1450	24	1446	17	1446	17	0.276625	Core
12WPY36_112	210.1	0.73	0.84	0.01	0.1017	0.0016	0.42433	619	5.6	624.6	9.5	613	21	624.6	9.5	0.904685	Single Age
12WPY36_113	241.7	0.663	0.8619	0.0097	0.103	0.0013	0.41576	631	5.3	632	7.4	621	18	632	7.4	0.158479	Single Age
12WPY36_114	827	14.5	2.369	0.068	0.1914	0.0056	0.95921	1231	20	1137	32	1424	13	1137	32	7.63607	Single Age
12WPY36_115	78.3	1.051	1.827	0.029	0.1773	0.0021	0.55355	1056.3	9.8	1052	11	1083	19	1052	11	0.407081	Single Age
12WPY36_116	610	0.747	0.834	0.013	0.0989	0.0016	0.88145	616.3	7.2	608	9.4	642.9	8.2	608	9.4	1.34675	Single Age
12WPY36_117	196.1	0.463	0.8265	0.0083	0.1	0.001	0.86426	611.5	4.6	614.5	5.8	610	12	614.5	5.8	0.490597	Single Age
12WPY36_118	828	4.92	0.787	0.022	0.0913	0.0022	0.83922	589	12	563	13	671	25	563	13	4.41426	Rim
12WPY36_118	471	0.886	1.368	0.017	0.1414	0.0018	0.62797	875.1	7.3	853	10	939	13	853	10	2.52543	Core
12WPY36_119	340	1.191	0.946	0.011	0.1118	0.0014	0.7598	675.9	5.9	683.3	8.1	664.1	9.1	683.3	8.1	1.09484	Single Age
12WPY36_120	225.5	0.491	9.03	0.22	0.4158	0.0073	0.88096	2339	22	2241	33	2418	14	2418	14	7.3201	Single Age
12WPY36_121	202.6	0.572	6.746	0.088	0.3795	0.0045	0.95744	2077	12	2073	21	2082.2	7.9	2082.2	7.9	0.44184	Single Age
12WPY36_122	263	1.93	1.478	0.032	0.1554	0.0033	0.91885	922	13	931	18	909.2	8.8	931	18	0.976139	Single Age
12WPY36_123	1122	13.69	0.647	0.011	0.0774	0.0017	0.85617	506.4	7.1	481	10	621	12	481	10	5.0158	Rim
12WPY36_123	340	4.94	1.558	0.016	0.1575	0.0021	0.36821	953.6	6.4	943	12	990	15	943	12	1.11158	Core
12WPY36_124	57	0.651	1.9	0.026	0.1878	0.0024	0.61101	1080.3	9.2	1109	13	1024	16	1109	13	2.65667	Single Age
12WPY36_125	41.09	0.5693	1.643	0.036	0.1642	0.0023	0.23146	986	14	980	13	1016	22	980	13	0.608519	Single Age
12WPY41_1	90	1.228	0.917	0.019	0.1056	0.0016	0.47064	659.9	9.9	647	9.3	695	21	647	9.3	1.95484	Single Age
12WPY41_2	417	0.537	4.087	0.076	0.2828	0.0041	0.64167	1650	15	1605	21	1711	19	1711	19	6.19521	Single Age
12WPY41_3	246	1.053	0.844	0.01	0.0996	0.0014	0.54416	621	5.6	611.8	8.3	659	14	611.8	8.3	1.48148	Single Age
12WPY41_4	339	1.451	0.981	0.011	0.1068	0.001	0.71758	693.8	5.7	654.1	5.9	836.7	9.5	654.1	5.9	5.72211	Single Age
12WPY41_5	238	4.66	2.338	0.022	0.2097	0.0021	0.39912	1224.6	6.8	1227	11	1227	15	1227	15	0	Single Age
12WPY41_6	162	0.957	1.275	0.013	0.1404	0.0015	0.49466	834.5	6	846.9	8.5	791	12	846.9	8.5	1.48592	Single Age
12WPY41_7	284.5	2.47	2.257	0.096	0.1765	0.0049	0.95035	1200	31	1047	27	1494	35	DISC	DISC	12.75	Single Age
12WPY41_8	267	5.74	4.61	0.13	0.2856	0.0067	0.94929	1747	24	1622	34	1895	10	1895	10	14.4063	Single Age
12WPY41_9	317	1.51	5.38	0.046	0.3267	0.0035	0.70599	1881.2	7.4	1822	17	1951	9.1	1951	9.1	6.61199	Single Age
12WPY41_10	317.9	24.7	0.997	0.035	0.1047	0.0014	0.13974	702	18	641.7	8.1	947	75	641.7	8.1	8.58974	Rim
12WPY41_10	349	5.02	3.329	0.072	0.222	0.0036	0.67908	1487	17	1292	19	1787	21	1787	21	27.7001	Core
12WPY41_11	231	1.623	2.857	0.065	0.2118	0.0039	0.86993	1374	17	1238	21	1594	18	1594	18	22.3338	Single Age
12WPY41_12	160.7	0.67	1.502	0.022	0.1514	0.002	0.66064	930.6	9.1	909	11	988	15	909	11	2.32108	Single Age
12WPY41_13	399.3	2.662	0.6537	0.0058	0.0817	0.00077	0.62417	511.1	3.6	506.3	4.6	525	11	506.3	4.6	0.939151	Single Age
12WPY41_14	189	0.575	8.57	0.16	0.3639	0.0054	0.83369	2293	17	2000	25	2562	11	2562	11	21.936	Single Age
12WPY41_15	243	1.28	1.243	0.025	0.127	0.0024	0.82667	821	12	771	14	967	16	771	14	6.09013	Single Age
12WPY41_16	79.7	0.778	2.295	0.041	0.1881	0.003	0.68644	1210	13	1114	16	1377	15	1114	16	7.93388	Single Age
12WPY41_17	393	2.24	0.9066	0.0092	0.1035	0.0011	0.42555	655	4.9	634.7	6.5	730	18	634.7	6.5	3.09924	Single Age
12WPY41_18	138	0.856	1.427	0.052	0.1486	0.0036	0.9075	901	22	893	20	938	24	893	20	0.887902	Single Age
12WPY41_19	132.1	1.157	5.682	0.091	0.348	0.0048	0.93513	1927	14	1924	23	1935	12	1935	12	0.568475	Single Age
12WPY41_20	78.6	0.427	12.208	0.087	0.5128	0.0037	0.53377	2620.1	6.7	2668	16	2587.6	7	2587.6	7	3.10713	Single Age
12WPY41_22	895	10	0.934	0.014	0.1089	0.0013	0.75254	669	7.1	666.5	7.4	685	12	666.5	7.4	0.373692	Single Age
12WPY41_23	518	3.47	1.135	0.018	0.1203	0.0019	0.84107	770.1	8.6	732	11	873	13	732	11	4.94741	Single Age
12WPY41_24	71	0.665	0.917	0.011	0.10741	0.00094	0.3098	660.8	5.6	657.6	5.5	654	14	657.6	5.5	0.484262	Single Age
12WPY41_25	457	1.58	9.43	0.17	0.4259	0.0052	0.7965	2380	17	2286	24	2455	15	2455	15	6.88391	Single Age
12WPY41_27	924	14.43	4.539	0.073	0.2836	0.0028	0.75761	1737	14	1609	14	1892	16	1892	16	14.9577	Single Age
12WPY41_28	514	1.016	1.649	0.012	0.1632	0.0012	0.52015	989	4.7	974.2	6.7	1016	11	974.2	6.7	1.49646	Single Age
12WPY41_29	93.3	1.038	1.042	0.013	0.1182	0.0011	0.31162	724.7	6.6	720.2	6.4	744	15	720.2	6.4	0.620947	Single Age
12WPY41_30	96.5	0.452	0.843	0.013	0.0991	0.0013	0.41217	620.1	7.2	609.3	7.5	669	23	609.3	7.5	1.74165	Single Age
12WPY41_31	494	1.2	9.21	0.1	0.4129	0.0041	0.82814	2359.6	9.9	2228	19	2464.6	6	2464.6	6	9.59994	Single Age
12WPY41_32	531	0.75	0.8524	0.0067	0.10255	0.00086	0.48286	625.8	3.7	629.3	5.1	610	11	629.3	5.1	0.559284	Single Age
12WPY41_33	176.7	0.808	1.718	0.018	0.1693	0.0016	0.50259	1015	6.5	1008.2	8.7	1026	10	1008.2	8.7	0.669951	Single Age
12WPY41_34	333	0.571	0.8737	0.0085	0.1046	0.001	0.37463	637.4	4.6	641.2	5.8	625	13	641.2	5.8	0.596172	Single Age
12WPY41_35	53.9	0.907	0.901	0.018	0.1018	0.0015	0.49759	651.7	9.4	624.8	8.8	745	31	624.8	8.8	4.12767	Single Age
12WPY41_36	98.1	1.37	1.009	0.023	0.1125	0.0019	0.61205	707	12	687	11	784	25	687	11	2.82885	Single Age
12WPY41_37	32.7	0.4013	6.1	0.21	0.343	0.013	0.9285	1982	30	1894	64	2101	14	2101	14	9.85245	Single Age
12WPY41_38	62.9	0.991	1.625	0.026	0.1611	0.0018	0.43034	979	10	962.6	9.9	1012	17	962.6	9.9	1.67518	Single Age
12WPY41_39	439	2.37	0.797	0.017	0.0961	0.0019	0.83421	594.1	9.5	591	11	630	12	591	11	0.521798	Single Age
12WPY41_40	152.3	0.721	0.888	0.02	0.1038	0.0015	0.81075	644	11	636.4	9	670	22	636.4	9	1.18012	Single Age
12WPY41_41	88.4	0.4367	1.159	0.027	0.1216	0.0018	0.23527	781	13	740	10	896	38	740	10	5.24968	Single Age
12WPY41_42	627	7.01	1.419	0.021	0.1453	0.0019	0.83236	896.4	8.8	875	11	953.3	9.6	875	11	2.38733	Single Age
12WPY41_43	503.2	3.84	1.132	0.025	0.1178	0.0017	0.90703	767	12	719	9.7	906	20	719	9.7	6.25815	Single Age
12WPY41_44	452	15.7	1.084	0.02	0.1238	0.0019	0.86855	745	10	752	11	726	14	752	11	0.939597	Single Age
12WPY41_45	87.7	0.9575	1.554	0.02	0.1539	0.0021	0.52397	951.7	7.8	922	11	1028	14	922	11	3.12073	Single Age
12WPY41_46	1256	3.01	3.048	0.047	0.1878	0.0025	0.85346	1419	12	1109	13	1931	11	DISC	DISC	21.8464	Single Age
12WPY41_47	79.2	0.402	1.499	0.025	0.1576	0.0023	0.54615	930.6	9.8	943	13	908	14	943	13	1.33247	Single Age
12WPY41_48	236	0.586	0.838	0.014	0.0991	0.0015	0.50319	617.4	7.8	609.3	9	658	23	609.3	9	1.31195	Single Age
12WPY41_49	211.5	1.167	5.42	0.054	0.3261	0.0052	0.55124	1887.5	8.5	1819	25	1951	14	1951	14	6.76576	Single Age
12WPY41_50	682.9	0.594	1.309	0.012	0.1401	0.0016	0.736	849.3	5.4	844.9	8.8	869	10	844.9	8.8	0.518074	Single Age
12WPY41_51	438	3.32	1.55	0.041	0.1605	0.0035	0.96475	948	17	959	19	921	16	959	19	1.16034	Single Age
12WPY41_52	193	0.93	1.401	0.062	0.1456	0.0047	0.94908	883	27	875	27	909	28	875	27	0.906002	Single Age
12WPY41_53	346	3.57	1.859	0.028	0.1746	0.0025	0.69582	1067.1	9.7	1037	14	1128	20	1037	14	2.82073	Single Age
12WPY41_54	947	1.475	0.878	0.0078	0.1016	0.001	0.5995	639.7	4.2	623.9	6	702	11	623.9	6	2.46991	Single Age
12WPY41_55	397	6.02	0.8885	0.0097	0.1061	0.0011	0.58529	645.3	5.2	650.3	6.6	647	12	650.3	6.6	0.774833	Single Age
12WPY41_56	281	0.7704	1.748	0.013	0.174	0.0012	0.4504	1026.2	4.7	1034.1	6.9	1009	11	1034.1	6.9	0.76983	Single Age
12WPY41_57	106.2	1.908	0.933	0.011	0.1116	0.0011	0.36822	668.9	5.8	681.8	6.6	642	15	681.8	6.6	1.92854	Single Age
12WPY41_58	128	0.569	11.45	0.13	0.4793	0.005	0.7515	2561	10	2524	22	2588.1	6.1	2588.1	6.1	2.47672	Single Age
12WPY41_59	790	2.67	3.495	0.058	0.1944	0.0026	0.85128	1527	13	1145	14	2106	10	DISC	DISC	25.0164	Single Age
12WPY41_60	880	8.2	1.656	0.066	0.121	0.0028	0.97137	990	25	736	16	1615	34	DISC	DISC	25.6566	Single Age
12WPY41_61	124.2	0.378	1.749	0.018	0.1707	0.0016	0.48005	1026.5	6.8	1016.1	8.6	1049	14	1016.1	8.6	1.01315	Single Age
12WPY41_62	106.4	2.54	0.934	0.019	0.1091	0.0014	0.49237	668.9	9.7	667.7	8.2	691	25	667.7	8.2	0.179399	Single Age
12WPY41_63	337	4.4	1.453	0.022	0.1528	0.0019	0.92184	911.9	8.6	916	11	908.2	9	916	11	0.449611	Single Age
12WPY41_64	573	2.9	1.083	0.02	0.1182	0.002	0.88412	744.2	9.6	720	11	820	10	720	11	3.25181	Single Age
12WPY41_65	430	9.9	0.776	0.017	0.0882	0.0014	0.90543	582.1	9.8	544.7	8.5	733	15	544.7	8.5	6.42501	Single Age
12WPY41_66	428	0.496	7.293	0.093	0.3269	0.0041	0.7436	2147	11	1823	20	2472	9.8	2472	9.8	26.254	Single Age
12WPY41_67	123.1	1.268	4.63	0.14	0.303	0.0075	0.95539	1754	24	1705	37	1818	10	1818	10	6.21562	Single Age
12WPY41_68	132.1	0.3888	1.793	0.027	0.1724	0.0019	0.2745	1043.7	9.4	1025	10	1071	21	1025	10	1.7917	Single Age
12WPY41_69	725	1.891	1.0648	0.0092	0.1197	0.0013	0.68451	736	4.5	728.9	7.4	768.9	9.5	728.9	7.4	0.964674	Single Age
12WPY41_70	112	1.731	8.423	0.063	0.3961	0.0044	0.52735	2277.4	6.8	2150	20	2402.8	8.7	2402.8	8.7	10.5211	Single Age
12WPY41_71	112	1.83	0.896	0.013	0.1062	0.0017	0.29282	651	7.1	650.6	9.8	649	24	650.6	9.8	0.0614439	Single Age
12WPY41_72	929	5.53	0.8964	0.0097	0.1014	0.0014	0.043075	649.7	5.2	622.6	7.9	747	24	622.6	7.9	4.17116	Single Age
12WPY41_73	341.6	4.92	12.628	0.085	0.4936	0.0044	0.70561	2653.8	6.4	2586	19	2713	4	2713	4	4.68116	Single Age
12WPY41_74	90.9	0.5291	5.635	0.052	0.3581	0.0036	0.49141	1921	8	1973	17	1863	12	1863	12	5.90446	Single Age
12WPY41_75	133	1.43	1.104	0.018	0.1286	0.0016	0.62256	756.1	8.7	779.5	9.1	709	17	779.5	9.1	3.09483	Single Age
12WPY41_76	74	0.513	0.804	0.014	0.0983	0.0016	0.46873	598.4	8	604.3	9.2	574	21	604.3	9.2	0.985963	Single Age
12WPY41_77	195.9	0.897	11.84	0.16	0.4821	0.0076	0.71516	2590	13	2535	33	2641	10	2641	10	4.01363	Single Age
12WPY41_78	281	1.49	0.7843	0.0081	0.09445	0.00082	0.59591	587.7	4.6	581.8	4.9	609	11	581.8	4.9	1.00391	Single Age
12WPY41_79	158	1.277	0.906	0.015	0.1091	0.0017	0.52084	654.3	8.2	667.2	9.8	647	21	667.2	9.8	1.97157	Single Age
12WPY41_80	212	0.637	1.842	0.012	0.1813	0.0014	0.52955	1061.1	4.2	1075	7.3	1038	10	1075	7.3	1.30996	Single Age
12WPY41_81	904	0.423	0.894	0.011	0.1039	0.0016	0.79681	648.8	6.3	637.3	9.1	690	13	637.3	9.1	1.7725	Single Age
12WPY41_82	45.1	1.37	1.147	0.024	0.128	0.0018	0.55607	775	11	776	10	772	21	776	10	0.129032	Single Age
12WPY41_83	303	1.55	1.074	0.017	0.1241	0.0019	0.84009	741.3	8.5	754	11	706	14	754	11	1.71321	Single Age
12WPY41_84	589	0.49	3.621	0.083	0.2493	0.0048	0.91284	1552	18	1434	25	1726	11	1726	11	16.9177	Single Age
12WPY41_85	14	0.636	1.484	0.063	0.1549	0.0046	0.51325	920	25	928	26	898	48	928	26	0.869565	Single Age
12WPY41_86	245.7	0.905	7.26	0.21	0.3772	0.0072	0.94166	2148	27	2062	34	2246	20	2246	20	8.19234	Single Age
12WPY41_87	383.9	7.7	0.9302	0.0097	0.10979	0.00098	0.35682	667.5	5.1	671.5	5.7	659	12	671.5	5.7	0.599251	Single Age
12WPY41_88	291	227	0.893	0.019	0.1079	0.0018	0.22884	648	10	661	10	615	25	661	10	2.00617	Rim
12WPY41_88	253.5	1.17	10.4	0.16	0.4571	0.007	0.87748	2470	15	2426	31	2515.5	9.4	2515.5	9.4	3.55794	Core
12WPY41_89	244	1.034	11.21	0.36	0.471	0.012	0.93843	2539	29	2484	53	2581	12	2581	12	3.75823	Single Age
12WPY41_90	462	1.851	3.536	0.06	0.2022	0.0031	0.74507	1534	13	1187	17	2067	13	DISC	DISC	22.6206	Single Age
12WPY41_91	74.2	0.993	3.8	0.16	0.2654	0.0091	0.91632	1590	33	1516	46	1671	20	1671	20	9.27588	Single Age
12WPY41_92	65.1	0.344	1.8	0.22	0.104	0.002	0.78832	1013	74	637	12	1840	170	DISC	DISC	37.1175	Single Age
12WPY41_93	358.8	1.639	0.9281	0.0099	0.1084	0.001	0.57931	667.1	5	663.6	5.9	678	14	663.6	5.9	0.524659	Single Age
12WPY41_94	560	0.983	1.924	0.03	0.1558	0.0013	0.32921	1089	10	933.2	7.4	1422	29	DISC	DISC	14.3067	Single Age
12WPY41_95	491.5	4.556	0.9579	0.0089	0.1138	0.0011	0.45722	682.6	4.5	694.8	6.6	655	13	694.8	6.6	1.78728	Single Age
12WPY41_96	193.5	1.783	1.02	0.012	0.1197	0.0013	0.57608	713.4	5.8	728.6	7.4	673	13	728.6	7.4	2.13064	Single Age
12WPY41_97	157.5	0.44	0.8357	0.0098	0.1001	0.00095	0.57154	617.2	5.5	615	5.6	622	14	615	5.6	0.356448	Single Age
12WPY41_98	219.3	1.032	1.235	0.014	0.1349	0.0015	0.53362	816.4	6.2	815.5	8.7	822	14	815.5	8.7	0.11024	Single Age
12WPY41_100	190.7	0.661	10.58	0.099	0.4246	0.0042	0.79822	2486.3	8.7	2281	19	2661.6	6.6	2661.6	6.6	14.2997	Single Age
12WPY41_101	469	0.98	0.6843	0.0095	0.0865	0.0011	0.56001	529.1	5.7	534.6	6.8	521	14	534.6	6.8	1.0395	Single Age
12WPY41_102	755	3.75	4.602	0.04	0.285	0.0037	0.68314	1750.6	7.6	1616	19	1916	11	1916	11	15.6576	Single Age
12WPY41_103	116	2.6	0.786	0.012	0.096	0.0012	0.39138	588.5	6.5	591	6.9	587	25	591	6.9	0.424809	Single Age
12WPY41_104	254	1.065	1.668	0.015	0.1668	0.0012	0.5456	996.3	5.9	994.3	6.8	1007	12	994.3	6.8	0.200743	Single Age
12WPY41_105	350	1.244	3.476	0.085	0.2529	0.0043	0.90202	1522	19	1453	22	1628	16	1628	16	10.7494	Single Age
12WPY41_106	260	0.99	0.952	0.015	0.1103	0.0015	0.39691	678.5	7.7	674.4	8.8	695	21	674.4	8.8	0.604274	Single Age
12WPY41_107	40.3	0.848	13.02	0.13	0.5395	0.0067	0.62383	2681.4	9.4	2781	28	2618.5	9.3	2618.5	9.3	6.20584	Single Age
12WPY41_108	147.8	0.898	1.84	0.022	0.1794	0.0022	0.61899	1060.8	8.2	1066	12	1048	14	1066	12	0.490196	Single Age
12WPY41_109	94.7	0.535	1.469	0.021	0.1526	0.0018	0.42619	917.2	8.5	915.6	9.9	953	18	915.6	9.9	0.174444	Single Age
12WPY41_110	900	0.942	0.872	0.033	0.1041	0.0036	0.96315	636	18	638	21	654	12	638	21	0.314465	Single Age
12WPY41_111	291	26.1	0.797	0.017	0.0973	0.0021	0.28895	594.9	9.3	599	12	588	34	599	12	0.689191	Rim
12WPY41_111	416	5.71	1.65	0.039	0.142	0.0028	0.898	988	15	856	16	1305	14	DISC	DISC	13.3603	Core
12WPY41_112	298	2.69	1.34	0.068	0.1412	0.0055	0.95192	855	31	850	31	873	33	850	31	0.584795	Single Age
12WPY41_113	142.1	1.04	1.27	0.015	0.1395	0.0013	0.43296	832	6.6	842	7.1	813	12	842	7.1	1.20192	Single Age
12WPY41_114	69.6	0.7004	5.28	0.064	0.3363	0.0043	0.76457	1866	11	1868	21	1867.4	7.6	1867.4	7.6	0.0321302	Single Age
12WPY41_115	45.4	1.929	1.298	0.022	0.1414	0.0018	0.13863	844.2	9.7	852	10	834	25	852	10	0.923952	Single Age
12WPY41_116	13.97	0.02305	1.191	0.047	0.1309	0.0044	0.025663	798	21	792	25	853	58	792	25	0.75188	Single Age
12WPY41_117	604	3.75	1.562	0.018	0.1608	0.0018	0.65223	955.1	7	961	9.9	930	13	961	9.9	0.617736	Single Age
12WPY41_118	327	13.99	0.87	0.011	0.1029	0.0013	0.58853	635.6	6.1	631.6	7.5	657	11	631.6	7.5	0.629327	Single Age
12WPY41_119	132.3	1.136	8.44	0.15	0.3723	0.0057	0.76991	2279	16	2040	27	2510	12	2510	12	18.7251	Single Age
12WPY41_120	140.3	1.371	4.904	0.084	0.2961	0.004	0.80334	1802	15	1671	20	1969	12	1969	12	15.1346	Single Age
12WPY41_121	659	20.1	3.456	0.056	0.2368	0.0034	0.92332	1518	13	1370	18	1731.5	8	1731.5	8	20.8779	Single Age
12WPY41_122	1063	2.37	1.252	0.044	0.1115	0.00082	0.12994	821	19	681.4	4.8	1216	65	DISC	DISC	17.0037	Single Age
12WPY41_123	821	13.59	1.282	0.016	0.1377	0.0014	0.79148	838.6	7	831.7	7.9	867	11	831.7	7.9	0.8228	Single Age
12WPY41_124	123.7	0.965	5.97	0.14	0.3546	0.0057	0.59682	1969	20	1956	27	1990	19	1990	19	1.70854	Single Age
12WPY42_1	122.5	1.284	0.5812	0.0095	0.07475	0.00094	0.69452	464.9	6.1	464.6	5.7	479	33	464.6	5.7	0.06453	Single Age
12WPY42_2	23.2	1.769	0.885	0.027	0.1052	0.0021	0.21325	641	15	644	12	640	70	644	12	0.468019	Single Age
12WPY42_3	202.2	2.94	0.778	0.013	0.0943	0.0014	0.5686	583.8	7.3	581	8.3	577	31	581	8.3	0.479616	Single Age
12WPY42_4	265	4.6	1.283	0.031	0.1384	0.0034	0.70426	838	14	835	19	852	36	835	19	0.357995	Single Age
12WPY42_5	159	1.965	0.552	0.012	0.0708	0.001	0.64753	446.8	7.7	441	6.3	459	36	441	6.3	1.29812	Single Age
12WPY42_6	185.4	1.666	13.743	0.099	0.532	0.0049	0.74675	2731.8	6.8	2749	20	2715.1	9.9	2715.1	9.9	1.24857	Single Age
12WPY42_7	73.8	1.93	0.858	0.013	0.105	0.0011	0.23413	628.9	6.8	643.4	6.7	582	41	643.4	6.7	2.30561	Single Age
12WPY42_8	488	1.94	0.5899	0.0084	0.0757	0.0011	0.75026	472.6	5.4	470.6	6.4	467	23	470.6	6.4	0.423191	Single Age
12WPY42_9	304	2.95	0.974	0.042	0.1135	0.0046	0.77241	690	22	693	27	678	61	693	27	0.434783	Rim
12WPY42_9	107.1	1.9	1.429	0.027	0.1501	0.0023	0.44445	900	11	901	13	909	37	901	13	0.111111	Core
12WPY42_10	254	1.6	5.582	0.044	0.3417	0.0031	0.68178	1913.7	6.9	1895	15	1925	12	1925	12	1.55844	Single Age
12WPY42_11	104.8	0.739	1.748	0.022	0.1776	0.0019	0.52246	1028.1	8.6	1054	11	982	25	1054	11	2.51921	Single Age
12WPY42_12	593	3.874	0.9062	0.0091	0.1081	0.001	0.71864	654.8	4.8	661.8	5.9	626	16	661.8	5.9	1.06903	Single Age
12WPY42_13	74.6	0.629	4.769	0.069	0.2987	0.0042	0.71093	1780	12	1684	21	1881	20	1881	20	10.4732	Single Age
12WPY42_14	136.9	2.325	0.611	0.011	0.07958	0.00087	0.25975	483.7	6.8	493.6	5.2	410	42	493.6	5.2	2.04672	Single Age
12WPY42_15	151.2	1.169	0.725	0.012	0.0895	0.0013	0.54048	553.1	6.9	552.7	7.8	573	27	552.7	7.8	0.0723197	Single Age
12WPY42_16	242	1.362	0.923	0.013	0.1095	0.0018	0.75767	664.3	6.7	670	10	632	23	670	10	0.858046	Single Age
12WPY42_17	311	2.9	7.87	0.27	0.412	0.0064	0.84888	2222	29	2223	29	2221	35	2221	35	0.0900495	Single Age
12WPY42_18	905	4.89	0.604	0.013	0.0802	0.0021	0.6991	479.4	8.4	497	12	419	42	497	12	3.67126	Rim
12WPY42_18	462	7	4.358	0.083	0.2831	0.0063	0.78461	1707	17	1607	32	1812	27	1812	27	11.3135	Core
12WPY42_19	220.4	1.99	0.659	0.027	0.0849	0.0029	0.69831	513	17	525	17	503	62	525	17	2.33918	Rim
12WPY42_19	153.5	0.752	1.119	0.015	0.1246	0.0013	0.13456	762.3	7.3	757	7.7	762	35	757	7.7	0.695264	Core
12WPY42_20	109	1.541	0.58	0.011	0.07422	0.00087	0.26903	465.1	6.9	461.5	5.2	499	42	461.5	5.2	0.774027	Single Age
12WPY42_21	173	1.74	0.5713	0.0079	0.07409	0.0008	0.26858	458.6	5.1	460.7	4.8	457	34	460.7	4.8	0.457915	Single Age
12WPY42_22	23.7	3.78	0.928	0.03	0.1083	0.0022	0.1433	664	16	662	13	693	75	662	13	0.301205	Single Age
12WPY42_23	69	0.6307	0.75	0.016	0.0912	0.0014	0.11756	567.5	9.3	562.5	8	598	50	562.5	8	0.881057	Single Age
12WPY42_24	247	0.968	2.626	0.036	0.2192	0.0039	0.67916	1308.4	9.9	1277	20	1366	23	1366	23	6.51537	Single Age
12WPY42_25	596	25.8	0.781	0.012	0.0927	0.0012	0.43356	586	6.6	571.4	7.1	661	36	571.4	7.1	2.49147	Rim
12WPY42_25	84.8	0.714	3.82	0.073	0.2531	0.0043	0.67042	1596	15	1454	22	1776	27	1776	27	18.1306	Core
12WPY42_26	400	5.22	0.784	0.01	0.0948	0.0012	0.66155	587.5	5.7	583.9	6.8	604	24	583.9	6.8	0.612766	Single Age
12WPY42_27	116.4	1.617	0.5329	0.0079	0.0681	0.001	0.44565	433.5	5.2	424.5	6.2	474	37	424.5	6.2	2.07612	Single Age
12WPY42_28	121.1	4.5	0.605	0.025	0.0762	0.0028	0.3966	480	16	473	17	509	74	473	17	1.45833	Rim
12WPY42_28	37.2	0.638	0.81	0.023	0.0971	0.0016	0.069965	602	13	597.5	9.2	604	67	597.5	9.2	0.747508	Core
12WPY42_29	286	1.61	1.114	0.013	0.1262	0.0014	0.59972	760.8	6.3	766.1	8.2	752	21	766.1	8.2	0.696635	Single Age
12WPY42_30	70.8	1.176	1.037	0.017	0.1171	0.0016	0.30171	722.8	8.6	713.5	9.2	772	38	713.5	9.2	1.28666	Single Age
12WPY42_31	120.4	0.92	0.925	0.026	0.1077	0.0025	0.58055	664	14	659	14	690	51	659	14	0.753012	Rim
12WPY42_31	190.8	0.557	1.533	0.025	0.1574	0.0026	0.33704	943.4	9.9	942	15	965	40	942	15	0.148399	Core
12WPY42_32	82.8	1.847	0.899	0.015	0.1051	0.0012	0.45744	650.4	7.8	644.1	7.1	663	34	644.1	7.1	0.968635	Single Age
12WPY42_33	91.1	0.759	1.857	0.031	0.1773	0.0021	0.36798	1065	11	1052	12	1100	35	1052	12	1.22066	Single Age
12WPY42_34	165.4	0.7394	1.601	0.017	0.16	0.0011	0.19336	971.2	6.4	956.6	6.1	1018	24	956.6	6.1	1.50329	Single Age
12WPY42_35	54.5	0.9	1.705	0.023	0.17	0.0017	0.1473	1011.1	8.4	1011.9	9.5	1036	33	1011.9	9.5	0.0791217	Single Age
12WPY42_36	499	1.71	0.883	0.014	0.1039	0.0012	0.59444	642.3	7.7	638.2	7.4	671	31	638.2	7.4	0.638331	Rim
12WPY42_36	320	0.9479	1.006	0.023	0.1133	0.0016	0.5164	706	11	692.1	9.1	744	35	692.1	9.1	1.96884	Core
12WPY42_37	304	1.529	0.882	0.01	0.1065	0.0014	0.67782	642.4	5.8	652.4	8.3	621	25	652.4	8.3	1.55666	Single Age
12WPY42_38	96.6	0.791	1.563	0.025	0.1585	0.0025	0.23907	959	10	950	14	974	39	950	14	0.938478	Single Age
12WPY42_39	127	1.86	0.548	0.01	0.07081	0.00087	0.4216	443.1	6.6	441	5.2	443	39	441	5.2	0.473934	Single Age
12WPY42_41	96.2	3.72	0.874	0.014	0.1027	0.0013	0.21945	638.3	7.6	630.3	7.3	655	37	630.3	7.3	1.25333	Single Age
12WPY42_43	115.8	1.08	0.947	0.012	0.11	0.0014	0.27581	676.4	6	672.7	8.1	671	33	672.7	8.1	0.547014	Single Age
12WPY42_42	130	1.57	4.793	0.047	0.307	0.0031	0.56307	1783.2	8.2	1726	16	1841	18	1841	18	6.24661	Single Age
12WPY42_44	190	0.783	6.35	0.058	0.3373	0.0029	0.5253	2024.9	8	1873	14	2178	14	2178	14	14.0037	Single Age
12WPY42_45	125.8	1.304	1.492	0.019	0.1518	0.0017	0.58724	927.5	7.8	910.8	9.6	973	24	910.8	9.6	1.80054	Single Age
12WPY42_46	121	1.579	0.5634	0.0076	0.07219	0.00082	0.19185	454.5	5.1	449.3	4.9	484	38	449.3	4.9	1.14411	Single Age
12WPY42_47	33.55	0.972	1.402	0.026	0.1442	0.0017	0.37354	889	11	868.1	9.7	973	37	868.1	9.7	2.35096	Single Age
12WPY42_48	208	2.61	0.547	0.011	0.0697	0.001	0.585	442.6	7.2	434.5	6.3	490	37	434.5	6.3	1.83009	Single Age
12WPY42_49	139.2	7.09	0.765	0.01	0.0942	0.0012	0.30081	576.9	5.7	580.5	6.9	560	33	580.5	6.9	0.624025	Single Age
12WPY42_50	191.3	1.378	0.823	0.012	0.0978	0.0011	0.5098	609.2	6.8	601.6	6.2	637	28	601.6	6.2	1.24754	Single Age
12WPY42_51	87.5	3.04	11.79	0.28	0.468	0.01	0.836	2586	22	2474	45	2662	23	2662	23	7.06236	Single Age
12WPY42_52	142	2.47	0.594	0.026	0.0752	0.0022	0.54158	473	17	468	13	475	76	468	13	1.05708	Rim
12WPY42_52	40.6	3.07	1.026	0.026	0.1172	0.0026	0.079994	716	13	714	15	726	74	714	15	0.27933	Core
12WPY42_53	20.77	0.501	1.612	0.038	0.1594	0.0025	0.36215	973	15	953	14	1035	45	953	14	2.0555	Single Age
12WPY42_54	228	5.31	0.6859	0.0079	0.08721	0.00081	0.29526	530.1	4.8	539	4.8	499	29	539	4.8	1.67893	Single Age
12WPY42_55	105.8	1.555	0.4925	0.0086	0.0637	0.001	0.2863	406.4	5.9	398.1	6.1	465	50	398.1	6.1	2.04232	Single Age
12WPY42_56	139	1.964	0.581	0.013	0.0752	0.0013	0.6396	464.7	8.4	467.3	7.6	482	36	467.3	7.6	0.559501	Single Age
12WPY42_57	253	13.67	0.831	0.011	0.1008	0.0012	0.54865	613.7	6	619.1	6.9	592	25	619.1	6.9	0.879909	Single Age
12WPY42_58	101.8	0.882	5.461	0.054	0.3296	0.0037	0.54439	1894.1	8.5	1836	18	1951	16	1951	16	5.89441	Single Age
12WPY42_59	88.9	0.836	0.539	0.011	0.0693	0.0011	0.28545	438.2	7.7	431.7	6.7	470	49	431.7	6.7	1.48334	Single Age
12WPY42_60	184.2	17.3	0.9491	0.0096	0.1115	0.0011	0.33011	677.4	5	681.5	6.4	668	26	681.5	6.4	0.605255	Single Age
12WPY42_61	507.5	5.99	4.361	0.045	0.2644	0.0034	0.84736	1704.5	8.5	1512	17	1956	14	1956	14	22.6994	Single Age
12WPY42_62	522	0.981	0.541	0.0084	0.0705	0.0011	0.67162	438.8	5.5	438.9	6.5	443	28	438.9	6.5	0.0227894	Single Age
12WPY42_63	148	1.427	1.201	0.025	0.1275	0.0019	0.7123	800	12	774	11	874	27	774	11	3.25	Single Age
12WPY42_64	96.7	1.04	1.632	0.024	0.1592	0.0024	0.53541	983.7	8.9	954	14	1048	33	954	14	3.01921	Single Age
12WPY42_65	105.7	0.951	1.305	0.021	0.1395	0.0022	0.72589	848.7	9.1	842	13	868	27	842	13	0.789443	Single Age
12WPY42_66	231	1.125	7.059	0.084	0.3895	0.0046	0.88824	2118	11	2120	21	2110.5	9.6	2110.5	9.6	0.45013	Single Age
12WPY42_67	118	2.28	1.609	0.02	0.164	0.0018	0.47446	973.2	7.9	980.7	9.8	961	22	980.7	9.8	0.770654	Single Age
12WPY42_68	143	1.956	1.2	0.014	0.1258	0.0014	0.50131	800.4	6.3	763.9	7.9	903	23	763.9	7.9	4.56022	Single Age
12WPY42_69	57.9	2.05	11.89	0.18	0.4922	0.0068	0.76336	2594	14	2579	29	2620	21	2620	21	1.56489	Single Age
12WPY42_70	24.1	0.563	0.92	0.03	0.1044	0.0025	0.17341	660	16	640	15	716	73	640	15	3.0303	Single Age
12WPY42_71	157.1	0.605	1.771	0.019	0.1742	0.0013	0.39232	1034.5	6.8	1036.1	7.3	1025	19	1036.1	7.3	0.154664	Single Age
12WPY42_72	161.9	1.002	0.998	0.012	0.1153	0.0011	0.18743	702.7	5.9	703.2	6.3	700	27	703.2	6.3	0.0711541	Single Age
12WPY42_73	255	2.47	0.5734	0.0092	0.07479	0.00098	0.30296	459.9	6	464.9	5.9	467	40	464.9	5.9	1.08719	Single Age
12WPY42_74	57.7	0.443	0.847	0.018	0.0962	0.0013	0.038182	622.3	9.6	592.1	7.5	746	51	592.1	7.5	4.85296	Single Age
12WPY42_75	73.4	2.49	1.761	0.033	0.1724	0.0031	0.74363	1035	12	1025	17	1034	28	1025	17	0.966184	Single Age
12WPY42_76	383	9.6	0.7624	0.0089	0.0933	0.0012	0.55408	575.2	5.1	575.1	7.3	555	26	575.1	7.3	0.0173853	Single Age
12WPY42_77	58	0.53	4.923	0.054	0.3166	0.0037	0.55387	1805.4	9.3	1773	18	1851	21	1851	21	4.21394	Single Age
12WPY42_78	441	0.712	0.8333	0.0091	0.0993	0.0011	0.56725	615.2	5	610.5	6.5	633	22	610.5	6.5	0.763979	Single Age
12WPY42_79	107	0.679	1.777	0.025	0.175	0.0022	0.50446	1037.3	9.3	1040	12	1019	26	1040	12	0.260291	Single Age
12WPY42_80	318.4	2.19	0.7945	0.0083	0.0966	0.0011	0.60112	594.1	4.8	594.1	6.5	572	21	594.1	6.5	0	Single Age
12WPY42_81	607	13.02	0.8977	0.0073	0.10547	0.00084	0.57864	650.4	3.9	646.3	4.9	660	16	646.3	4.9	0.630381	Single Age
12WPY42_82	150.5	1.376	2.302	0.021	0.1948	0.0015	0.44444	1213.4	6.5	1147.3	7.9	1337	17	1147.3	7.9	5.4475	Single Age
12WPY42_83	68.6	0.921	0.742	0.015	0.0895	0.0011	0.29156	565.5	8.4	552.6	6.4	637	43	552.6	6.4	2.28117	Single Age
12WPY42_84	43.6	1.497	1.556	0.026	0.1603	0.0027	0.086379	953	10	958	15	955	48	958	15	0.524659	Single Age
12WPY42_85	162	1.496	0.545	0.01	0.07002	0.00087	0.51985	441.3	6.6	436.3	5.2	440	34	436.3	5.2	1.13302	Single Age
12WPY42_86	148.8	2.06	0.93	0.012	0.1079	0.0011	0.33157	669.8	6.7	660.4	6.3	706	29	660.4	6.3	1.4034	Single Age
12WPY42_87	140.6	2.09	1.656	0.021	0.1654	0.0019	0.66555	992.4	8	986	11	1024	21	986	11	0.644901	Single Age
12WPY42_88	35.5	0.507	1.773	0.058	0.1698	0.0037	0.45035	1035	21	1010	20	1071	50	1010	20	2.41546	Single Age
12WPY42_89	251.2	4.94	1.415	0.019	0.1472	0.0016	0.75954	894.7	7.9	885.1	9.2	901	19	885.1	9.2	1.07299	Single Age
12WPY42_90	197.3	1.323	0.5396	0.008	0.06957	0.00086	0.47116	437.9	5.3	433.5	5.2	458	34	433.5	5.2	1.0048	Single Age
12WPY42_91	98.9	2.163	6.074	0.076	0.3568	0.0045	0.83056	1986	11	1966	22	2010	15	2010	15	2.18905	Single Age
12WPY42_92	499	2.764	10.66	0.12	0.433	0.0061	0.8325	2493	10	2319	28	2640	13	2640	13	12.1591	Single Age
12WPY42_93	36.3	0.366	0.92	0.032	0.0964	0.0029	0.76836	663	16	593	17	915	50	DISC	DISC	10.5581	Single Age
12WPY42_94	247	1.81	0.5324	0.0078	0.06933	0.00086	0.39254	433.2	5.2	432.1	5.2	439	34	432.1	5.2	0.253924	Single Age
12WPY42_95	254	1.98	0.5783	0.0086	0.0744	0.0012	0.64476	463.1	5.5	462.5	7.3	470	28	462.5	7.3	0.129562	Single Age
12WPY42_96	463	2.82	0.56	0.0079	0.0723	0.00074	0.48433	451.3	5.2	450	4.5	465	29	450	4.5	0.288057	Single Age
12WPY42_97	409	43.5	0.946	0.018	0.1122	0.0017	0.6252	675.6	9.4	685.4	9.6	668	31	685.4	9.6	1.45056	Rim
12WPY42_97	216	1.82	2.065	0.045	0.1912	0.0033	0.65459	1136	15	1128	18	1161	36	1128	18	0.704225	Core
12WPY42_98	162	1.42	0.5696	0.0085	0.07432	0.0009	0.58665	457.5	5.5	462.1	5.4	441	28	462.1	5.4	1.00546	Single Age
12WPY42_99	52.2	0.684	4.16	0.16	0.2559	0.0095	0.93862	1663	32	1473	48	1916	25	1916	25	23.1211	Single Age
12WPY42_100	100.1	0.563	5.385	0.048	0.3335	0.0032	0.49838	1882	7.7	1855	15	1907	17	1907	17	2.7268	Single Age
12WPY42_101	21.7	0.3902	1.549	0.037	0.1584	0.0027	0.47666	950	14	948	15	962	38	948	15	0.210526	Single Age
12WPY42_102	335	2.29	0.5577	0.0077	0.07182	0.00061	0.39164	449.9	5	447.1	3.7	466	28	447.1	3.7	0.622361	Single Age
12WPY42_103	171	2.45	10.93	0.14	0.4557	0.0069	0.75531	2516	12	2419	30	2595	16	2595	16	6.78227	Single Age
12WPY42_104	247	2.71	0.0972	0.0025	0.01473	0.00021	0.09159	94.2	2.3	94.2	1.3	112	62	94.2	1.3	0	Single Age
12WPY42_105	43.5	0.786	1.026	0.023	0.1162	0.0018	0.045414	716	12	710	10	728	55	710	10	0.837989	Single Age
12WPY42_106	737	3.245	0.8232	0.0066	0.09871	0.00098	0.68756	609.7	3.7	606.8	5.7	614	19	606.8	5.7	0.475644	Single Age
12WPY42_107	173	1.661	0.579	0.014	0.07348	0.00095	0.44886	463.4	8.7	457.1	5.7	507	46	457.1	5.7	1.35952	Single Age
12WPY42_108	85.2	2.767	0.885	0.014	0.1019	0.0011	0.23092	645.8	7.2	625.5	6.4	701	35	625.5	6.4	3.14339	Single Age
12WPY42_109	151	2.828	0.528	0.011	0.0678	0.0011	0.014792	430.3	7.4	422.7	6.5	449	71	422.7	6.5	1.76621	Single Age
12WPY42_110	105.4	1.99	0.5436	0.0081	0.06996	0.00079	0.29184	440.6	5.3	435.9	4.7	474	38	435.9	4.7	1.06673	Single Age
12WPY42_111	126.5	0.784	1.188	0.028	0.1288	0.0021	0.76103	794	13	781	12	853	32	781	12	1.63728	Single Age
12WPY42_112	231	1.867	0.5352	0.0097	0.0682	0.0012	0.50679	435.9	6.6	425.4	7.2	493	34	425.4	7.2	2.40881	Single Age
12WPY42_113	127	1.101	0.817	0.014	0.0894	0.0017	0.42524	605.7	7.7	552	10	801	39	552	10	8.86578	Single Age
12WPY42_114	246	1.709	0.5304	0.0082	0.06844	0.0008	0.31761	431.8	5.4	426.7	4.8	459	36	426.7	4.8	1.1811	Single Age
12WPY42_115	95	1.52	6.763	0.071	0.3806	0.0037	0.832	2080.2	9.3	2079	17	2059	14	2059	14	0.971345	Single Age
12WPY42_116	590	4.52	0.755	0.014	0.0925	0.0016	0.77811	572.3	8.3	570	9.5	600	28	570	9.5	0.401887	Single Age
12WPY42_117	260	2.42	0.92	0.018	0.1089	0.0026	0.76548	662.2	9.5	666	15	644	31	666	15	0.573845	Single Age
12WPY42_118	242	1.752	0.95	0.012	0.112	0.0015	0.55022	677.6	6.1	684.4	8.4	657	24	684.4	8.4	1.00354	Single Age
12WPY42_119	245	4.85	5.754	0.047	0.338	0.003	0.60619	1939.2	7.1	1877	14	2009	15	2009	15	6.57043	Single Age
12WPY42_120	53.4	1.239	0.891	0.022	0.1033	0.0014	0.3324	649	12	633.6	7.9	679	54	633.6	7.9	2.37288	Single Age
12WPY42_121	386	6.2	0.972	0.032	0.1122	0.0031	0.94033	690	16	685	18	736	25	685	18	0.724638	Single Age
12WPY42_123	436	4.4	0.953	0.015	0.1108	0.0013	0.247	679.7	8	677.6	7.6	696	37	677.6	7.6	0.30896	Rim
12WPY42_123	291.1	0.636	1.244	0.021	0.1332	0.0018	0.58857	820.3	9.3	806	10	870	36	806	10	1.74326	Core
12WPY42_124	194	3.39	1.206	0.037	0.1283	0.0027	0.79202	801	17	778	15	863	34	778	15	2.87141	Single Age
12WPY43_1	1232	1.7	1.502	0.034	0.149	0.0028	0.9524	931	14	895	16	1005	15	895	16	3.86681	Single Age
12WPY43_2	1560	2.58	1.543	0.022	0.1516	0.0019	0.64421	947	8.8	910	10	1035	12	910	10	3.90707	Single Age
12WPY43_3	36	1.386	0.987	0.016	0.1107	0.0012	0.29893	696.6	7.9	676.8	6.9	778	23	676.8	6.9	2.84238	Single Age
12WPY43_4	537	1.788	1.28	0.029	0.1271	0.0021	0.23456	836	13	773	13	1018	39	773	13	7.53589	Single Age
12WPY43_5	240	5.38	0.945	0.012	0.1104	0.0016	0.65154	675.3	6.4	675	9.5	665	14	675	9.5	0.0444247	Single Age
12WPY43_6	493	2.067	4.773	0.098	0.2413	0.0046	0.85598	1779	17	1393	24	2264	13	DISC	DISC	38.4717	Single Age
12WPY43_7	269	2.81	5.684	0.088	0.3377	0.0051	0.80561	1930	14	1879	25	2015	14	2015	14	6.74938	Single Age
12WPY43_8	665	18.5	0.8526	0.0099	0.101	0.0011	0.74572	625.9	5.4	620.3	6.7	648	12	620.3	6.7	0.894712	Single Age
12WPY43_9	429.2	4.71	5.35	0.17	0.286	0.0094	0.94308	1885	27	1620	47	2179	12	2179	12	25.654	Single Age
12WPY43_10	57	1.788	0.863	0.016	0.1007	0.0019	0.63754	631.2	8.6	618	11	681	27	618	11	2.09125	Single Age
12WPY43_11	306	0.906	4.539	0.057	0.2893	0.0035	0.56871	1738	10	1638	18	1848	21	1848	21	11.3636	Single Age
12WPY43_12	227	0.855	1.461	0.02	0.1468	0.0021	0.687	913.8	8.2	883	12	978	12	883	12	3.37054	Single Age
12WPY43_13	541	13.23	0.953	0.021	0.1146	0.0022	0.74038	679	11	699	13	620	19	699	13	2.94551	Single Age
12WPY43_14	216.4	3.48	1.155	0.035	0.1206	0.0034	0.77573	778	16	733	20	903	35	733	20	5.78406	Single Age
12WPY43_15	203	0.758	1.693	0.026	0.1692	0.0026	0.84888	1005	10	1008	14	991	12	1008	14	0.298507	Single Age
12WPY43_16	241	1.754	1.873	0.053	0.1782	0.0048	0.83402	1071	19	1057	26	1088	14	1057	26	1.30719	Single Age
12WPY43_17	59.1	0.69	2.283	0.043	0.1842	0.0038	0.75917	1206	13	1089	20	1402	17	1089	20	9.70149	Single Age
12WPY43_18	441	2.598	3.024	0.031	0.2115	0.0028	0.72219	1413.5	7.9	1236	15	1687	11	1687	11	26.7338	Single Age
12WPY43_19	188.3	1.142	1.616	0.027	0.1594	0.0022	0.48078	976	10	953	13	1020	16	953	13	2.35656	Single Age
12WPY43_20	124.6	1.155	1.581	0.018	0.1589	0.002	0.68314	962.5	7	950	11	1006	13	950	11	1.2987	Single Age
12WPY43_21	143	0.826	1.6	0.024	0.1624	0.0027	0.79726	969.9	9.4	970	15	989	14	970	15	0.0103103	Single Age
12WPY43_22	188	1.775	1.033	0.021	0.1105	0.0018	0.72651	720	10	675	10	853	22	675	10	6.25	Single Age
12WPY43_23	434	1.699	7.34	0.18	0.3532	0.0071	0.75149	2152	22	1949	34	2354	20	2354	20	17.2048	Single Age
12WPY43_24	210.9	4.9	1.636	0.041	0.1547	0.0037	0.90659	983	16	927	21	1113	12	927	21	5.69685	Single Age
12WPY43_25	494	27.7	0.8946	0.0084	0.1042	0.0011	0.66506	648.7	4.5	638.8	6.2	688.9	9.5	638.8	6.2	1.52613	Rim
12WPY43_25	256	1.282	1.149	0.017	0.1295	0.0022	0.77772	776.3	8	785	12	761	12	785	12	1.1207	Core
12WPY43_26	402	0.753	0.7312	0.0072	0.09013	0.0007	0.53267	557.1	4.2	556.3	4.1	568	12	556.3	4.1	0.143601	Single Age
12WPY43_27	65.7	2.053	2.529	0.028	0.2184	0.0023	0.65488	1279.7	8.1	1273	12	1292	14	1292	14	1.47059	Single Age
12WPY43_28	728	11.3	1.745	0.046	0.1651	0.0049	0.87705	1025	17	985	27	1110	15	985	27	3.90244	Rim
12WPY43_28	467	0.978	3.411	0.055	0.239	0.0039	0.81445	1509	12	1381	20	1673	11	1673	11	17.4537	Core
12WPY43_30	320	8.2	1.141	0.027	0.1246	0.0027	0.86148	773	13	757	15	855	20	757	15	2.06986	Rim
12WPY43_30	262	0.508	4.495	0.066	0.2867	0.0038	0.82436	1729	12	1625	19	1837	17	1837	17	11.5406	Core
12WPY43_31	91.4	0.818	1.418	0.016	0.1496	0.0016	0.63001	896	6.8	899.9	9.3	894	13	899.9	9.3	0.435268	Single Age
12WPY43_32	400	0.253	0.937	0.019	0.1066	0.0025	0.81117	672	10	653	15	731	15	653	15	2.82738	Single Age
12WPY43_33	627	1.854	1.483	0.025	0.1535	0.0035	0.81914	923	10	920	20	951	16	920	20	0.325027	Single Age
12WPY43_34	278	1.55	1.507	0.017	0.1564	0.0018	0.77882	932.7	6.8	936.9	9.8	933.4	9.9	936.9	9.8	0.450306	Single Age
12WPY43_35	430	0.575	0.973	0.021	0.1142	0.0027	0.75354	689	11	697	16	659	25	697	16	1.1611	Single Age
12WPY43_36	1227	6.08	0.8172	0.008	0.09575	0.00089	0.71285	606.9	4.4	589.4	5.2	671	9.1	589.4	5.2	2.88351	Single Age
12WPY43_37	183	0.683	4.69	0.17	0.2995	0.0098	0.97671	1761	29	1685	48	1853.7	9.7	1853.7	9.7	9.10072	Single Age
12WPY43_40	119	0.485	0.848	0.011	0.1017	0.0012	0.58742	623.2	5.8	624.1	7.3	629	14	624.1	7.3	0.144416	Single Age
12WPY43_41	132.2	1.73	1.134	0.018	0.1265	0.0017	0.87015	770.2	8.5	767.9	9.7	777	13	767.9	9.7	0.298624	Single Age
12WPY43_42	474	0.78	0.834	0.012	0.0999	0.0013	0.80656	615.4	6.3	613.5	7.6	629	13	613.5	7.6	0.308742	Single Age
12WPY43_43	466	9.27	1.064	0.014	0.1206	0.0017	0.69297	735.4	6.9	733.9	9.7	736	12	733.9	9.7	0.203971	Single Age
12WPY43_44	471	14.9	2.204	0.022	0.1965	0.0017	0.72805	1183	6.7	1156.4	9	1220	7.8	1156.4	9	2.24852	Single Age
12WPY43_45	98	10.5	0.772	0.03	0.094	0.0034	0.76171	580	17	579	20	577	37	579	20	0.172414	Single Age
12WPY43_46	455	2.74	1.612	0.028	0.1581	0.0027	0.93585	974	11	946	15	1038	17	946	15	2.87474	Single Age
12WPY43_47	260	5.35	0.873	0.012	0.1016	0.0015	0.75567	636.5	6.7	623.7	8.5	668	14	623.7	8.5	2.011	Single Age
12WPY43_48	328	0.581	1.416	0.023	0.1432	0.0019	0.67792	894.8	9.5	863	11	971	17	863	11	3.55387	Single Age
12WPY43_49	906	5.67	0.909	0.013	0.1053	0.0013	0.75041	656.6	7.1	645.3	7.4	691	15	645.3	7.4	1.72099	Single Age
12WPY43_50	176	1.348	1.12	0.012	0.125	0.0011	0.21897	762.8	5.9	759.1	6.5	780	11	759.1	6.5	0.485055	Single Age
12WPY43_51	141	1.06	5.04	0.1	0.3101	0.0056	0.93153	1824	17	1740	27	1922.5	9.5	1922.5	9.5	9.49285	Single Age
12WPY43_52	528	38.6	0.74	0.017	0.0864	0.0026	0.57569	562	10	534	15	668	27	534	15	4.98221	Rim
12WPY43_52	216.1	1.91	1.065	0.014	0.1227	0.0017	0.77751	737.3	7	745.8	9.8	702	16	745.8	9.8	1.15286	Core
12WPY43_54	1200	21.5	0.917	0.023	0.1064	0.003	0.57339	661	12	652	17	722	25	652	17	1.36157	Single Age
12WPY43_55	697	1.039	0.839	0.014	0.0998	0.0021	0.83991	618.2	7.9	613	12	646	11	613	12	0.841152	Single Age
12WPY43_56	1645	6.6	0.901	0.01	0.10126	0.00096	0.58053	652.3	5.4	621.8	5.6	750	11	621.8	5.6	4.67576	Single Age
12WPY43_58	243	0.64	1.826	0.017	0.1778	0.0014	0.67146	1055.6	5.9	1054.7	7.9	1057.3	9.1	1054.7	7.9	0.0852596	Single Age
12WPY43_59	443	0.574	0.832	0.013	0.0973	0.0015	0.75412	614.3	7	598.4	8.9	671	13	598.4	8.9	2.58831	Single Age
12WPY43_61	248.1	2	1.117	0.013	0.1248	0.0015	0.6985	761.9	5.8	758	8.4	764	11	758	8.4	0.511878	Single Age
12WPY43_63	1094	11.74	2.301	0.027	0.195	0.0025	0.707	1212.1	8.4	1148	14	1332	13	1148	14	5.28834	Single Age
12WPY43_64	120.2	1.755	1.043	0.02	0.1183	0.0027	0.77601	724.5	9.7	721	15	743	17	721	15	0.483092	Single Age
12WPY43_65	586	4.7	0.997	0.025	0.1107	0.0027	0.85988	705	12	676	16	783	18	676	16	4.11348	Rim
12WPY43_65	293	0.4536	1.337	0.026	0.1405	0.0035	0.47041	862	11	847	20	901	30	847	20	1.74014	Core
12WPY43_66	300	1.3	11.3	0.13	0.4662	0.005	0.80353	2549	11	2466	22	2607.3	7.1	2607.3	7.1	5.4194	Single Age
12WPY43_67	1239	26.8	0.8464	0.0099	0.0981	0.0015	0.5429	622.6	5.5	603	8.6	699	21	603	8.6	3.14809	Single Age
12WPY43_68	351	26.1	5.672	0.062	0.3329	0.0038	0.7284	1926.7	9.3	1852	18	2018.3	8	2018.3	8	8.23961	Single Age
12WPY43_69	595	1.18	0.7004	0.0076	0.08474	0.00093	0.71522	538.9	4.5	524.3	5.5	615	8.7	524.3	5.5	2.70922	Single Age
12WPY43_70	396.2	0.826	1.183	0.014	0.1287	0.0013	0.61627	792.5	6.5	780.3	7.1	822	12	780.3	7.1	1.53943	Single Age
12WPY43_71	682	1.27	1.277	0.012	0.1352	0.0012	0.73042	835.4	5.4	817.6	6.9	883	8.8	817.6	6.9	2.13072	Single Age
12WPY43_72	589	3.49	0.8646	0.0072	0.09935	0.00099	0.73337	632.5	3.9	610.6	5.8	700.2	8.6	610.6	5.8	3.46245	Single Age
12WPY43_74	1462	7.67	0.6988	0.0095	0.0807	0.0012	0.90953	537.8	5.6	500.1	6.9	683.3	9.4	500.1	6.9	7.01004	Single Age
12WPY43_75	462	0.676	1.131	0.029	0.1266	0.0036	0.93761	767	14	768	21	765	14	768	21	0.130378	Single Age
12WPY43_76	740	37.9	0.8168	0.0088	0.09647	0.00096	0.68585	606.1	4.9	593.6	5.7	652.8	9.4	593.6	5.7	2.06237	Single Age
12WPY43_77	438	1.518	1.291	0.022	0.1382	0.0035	0.7949	841.5	9.8	834	20	869	17	834	20	0.891266	Single Age
12WPY43_78	881	9.3	0.9	0.022	0.101	0.0019	0.70225	652	12	620	11	764	16	620	11	4.90798	Rim
12WPY43_78	324	2.66	1.283	0.027	0.1312	0.002	0.6196	840	11	795	11	967	16	795	11	5.35714	Core
12WPY43_79	81.6	1.018	1.045	0.016	0.1205	0.0019	0.68045	727.9	8.6	733	11	699	14	733	11	0.700646	Single Age
12WPY43_80	30.5	10.2	0.868	0.03	0.0983	0.0025	0.14631	633	16	605	15	746	48	605	15	4.42338	Rim
12WPY43_80	218.1	3.47	11.35	0.24	0.3627	0.0068	0.80833	2551	20	1994	32	3017	14	DISC	DISC	33.9079	Core
12WPY43_81	73.6	0.845	0.857	0.014	0.1012	0.0014	0.48318	629.1	8	621.4	8	644	21	621.4	8	1.22397	Single Age
12WPY43_82	703	2.84	0.88	0.025	0.1012	0.0029	0.86387	640	13	622	17	693	21	622	17	2.8125	Rim
12WPY43_82	395	1.36	1.141	0.025	0.1308	0.0025	0.85117	773	12	792	14	723	13	792	14	2.45796	Core
12WPY43_83	465	21	0.874	0.017	0.1013	0.004	0.58272	637.9	9.1	622	23	702	18	622	23	2.49255	Rim
12WPY43_83	232	0.838	1.765	0.02	0.1727	0.0021	0.70725	1033.7	7.6	1027	12	1029	13	1027	12	0.648157	Core
12WPY43_84	205.2	0.841	2.255	0.045	0.2026	0.0042	0.76817	1198	14	1189	23	1248	13	1189	23	0.751252	Single Age
12WPY43_85	172.6	1.847	9.93	0.12	0.4217	0.0045	0.819	2428	12	2273	20	2570.2	7.7	2570.2	7.7	11.5633	Single Age
12WPY43_86	166.9	0.999	4.14	0.14	0.2656	0.0065	0.90683	1660	28	1518	33	1827	17	1827	17	16.913	Single Age
12WPY43_87	189	5.4	0.878	0.019	0.1033	0.0023	0.65039	642	11	634	13	683	21	634	13	1.24611	Rim
12WPY43_87	173.2	1.451	1.06	0.018	0.1204	0.002	0.66732	733.5	8.7	733	11	722	15	733	11	0.0681663	Core
12WPY43_88	151	1.96	1.17	0.035	0.1305	0.0038	0.87589	785	17	791	22	788	17	791	22	0.764331	Single Age
12WPY43_89	500	7.4	0.906	0.019	0.1052	0.002	0.78623	654.4	9.9	645	12	691	12	645	12	1.43643	Single Age
12WPY43_90	379	2.08	7.83	0.21	0.3335	0.009	0.95895	2207	25	1853	44	2529.9	9.6	2529.9	9.6	26.756	Single Age
12WPY43_91	290	2.822	8.709	0.094	0.4214	0.0047	0.7693	2307.5	9.9	2266	21	2346.4	8	2346.4	8	3.42653	Single Age
12WPY43_92	100.4	1.076	0.94	0.011	0.1089	0.0015	0.56442	672.5	5.9	666.5	8.9	693	14	666.5	8.9	0.892193	Single Age
12WPY43_93	680	1.14	0.856	0.015	0.0977	0.0019	0.87107	627.3	8.3	603	11	699	12	603	11	3.87374	Single Age
12WPY43_94	208	1.15	1.83	0.037	0.1776	0.0037	0.63375	1055	13	1053	20	1043	24	1053	20	0.189573	Single Age
12WPY43_95	1185	1.125	1.078	0.013	0.1145	0.0015	0.81257	743.2	6	700.1	8.8	862.2	8.3	700.1	8.8	5.79925	Single Age
12WPY43_96	279.2	0.5059	1.659	0.018	0.1661	0.002	0.36336	992.8	6.9	991	11	1008	13	991	11	0.181305	Single Age
12WPY43_97	1404	1.026	4.74	0.1	0.3057	0.0065	0.89297	1773	18	1718	32	1834	13	1834	13	6.32497	Single Age
12WPY43_98	66.7	2.8	0.414	0.013	0.0506	0.0017	0.43641	351.9	9.5	318	10	565	58	318	10	9.63342	Rim
12WPY43_98	574	10.6	1.47	0.024	0.1456	0.0027	0.813	918	10	876	15	1009	14	876	15	4.57516	Core
12WPY43_99	693	1.31	1.598	0.026	0.1599	0.0022	0.67625	971	10	956	12	1010	14	956	12	1.5448	Single Age
12WPY43_100	203	2.1	0.852	0.0087	0.10317	0.00096	0.56236	626.2	4.9	632.9	5.6	605	13	632.9	5.6	1.06995	Single Age
12WPY43_101	325	1.483	0.834	0.013	0.0993	0.0013	0.48788	615.9	7	610.1	7.5	649	16	610.1	7.5	0.941711	Single Age
12WPY43_102	425	1.65	0.845	0.019	0.1019	0.0024	0.91186	621	10	625	14	618	13	625	14	0.644122	Single Age
12WPY43_103	305	4.76	1.009	0.052	0.1147	0.0054	0.63414	708	26	700	31	744	66	700	31	1.12994	Rim
12WPY43_103	248	2.36	1.456	0.015	0.1499	0.0015	0.48728	912	6.1	900.5	8.4	948	11	900.5	8.4	1.26096	Core
12WPY43_105	312	2.24	1.496	0.017	0.1543	0.0017	0.76555	928.5	6.7	924.9	9.4	942	7.7	924.9	9.4	0.387722	Single Age
12WPY43_106	646	6.36	1.689	0.025	0.1677	0.0027	0.84081	1005.2	9.7	999	15	1017	13	999	15	0.616793	Single Age
12WPY43_107	284	1.26	0.757	0.013	0.0932	0.0016	0.8223	571.8	7.7	574.3	9.5	582	12	574.3	9.5	0.437216	Single Age
12WPY43_108	374	3.93	1.807	0.033	0.1723	0.003	0.70062	1047	12	1024	16	1109	22	1024	16	2.19675	Single Age
12WPY43_109	459	5.79	0.912	0.014	0.0941	0.0016	0.26824	657.9	7.6	579.8	9.7	929	43	DISC	DISC	11.8711	Rim
12WPY43_109	240.2	1.309	1.387	0.021	0.1403	0.0026	0.75419	884.7	9.5	846	15	967	14	846	15	4.37436	Core
12WPY43_110	87.3	0.857	7.15	0.24	0.383	0.011	0.92708	2126	30	2086	52	2170	13	2170	13	3.87097	Single Age
12WPY43_111	673	0.941	1.285	0.02	0.1327	0.0023	0.74184	838.7	8.9	803	13	946.7	9.3	803	13	4.25659	Single Age
12WPY43_112	286	0.664	3.697	0.085	0.2639	0.0038	0.84677	1571	18	1512	20	1657	19	1657	19	8.75075	Single Age
12WPY43_113	423	1.331	0.949	0.013	0.11	0.0016	0.708	678.7	6.7	672.8	9.3	713	12	672.8	9.3	0.869309	Single Age
12WPY43_114	51	0.2958	11.12	0.25	0.4607	0.0091	0.88466	2537	21	2441	40	2599.9	9.6	2599.9	9.6	6.11177	Single Age
12WPY43_115	83.9	3.77	0.867	0.0099	0.10296	0.00095	0.4934	633.7	5.4	631.7	5.6	642	13	631.7	5.6	0.315607	Single Age
12WPY43_116	270.7	1.433	1.393	0.024	0.1465	0.0028	0.77763	886	10	881	16	916	15	881	16	0.564334	Single Age
12WPY43_117	272	0.224	2.191	0.026	0.1961	0.0024	0.64397	1177.9	8.4	1154	13	1236	13	1154	13	2.02903	Single Age
12WPY43_118	143	2.156	5.29	0.13	0.3087	0.0083	0.86432	1866	21	1733	41	2016	12	2016	12	14.0377	Single Age
12WPY43_119	373.6	1.197	6.09	0.1	0.344	0.0061	0.91895	1988	15	1905	29	2094.4	4.4	2094.4	4.4	9.04316	Single Age
12WPY43_120	137.7	1.29	1.396	0.038	0.1454	0.0024	0.83423	890	15	875	13	928	16	875	13	1.68539	Single Age
12WPY43_121	293	2.006	1.369	0.02	0.1447	0.0018	0.8594	875.1	8.4	871	10	899	10	871	10	0.468518	Single Age
12WPY43_123	253	1.349	4.422	0.089	0.2236	0.0037	0.86614	1717	17	1300	20	2271	11	DISC	DISC	42.7565	Single Age
12WPY43_125	127.2	0.663	1.787	0.016	0.1739	0.0014	0.58528	1040.5	5.8	1033.6	7.7	1056	9.7	1033.6	7.7	0.663143	Single Age
12WPY43_126	304	2.41	0.751	0.01	0.0926	0.0011	0.7301	569.4	5.9	571.1	6.3	558	12	571.1	6.3	0.29856	Single Age
12WPY43_127	106.7	0.736	11.554	0.096	0.4753	0.0044	0.84774	2568.4	7.8	2506	19	2615	6.7	2615	6.7	4.16826	Single Age
12WPY43_128	266	0.918	1.746	0.019	0.1708	0.0023	0.67884	1025.3	6.9	1017	12	1043	11	1017	12	0.809519	Single Age
12WPY43_129	358	0.418	1.383	0.026	0.1342	0.0022	0.86216	881	11	812	12	1033.5	9.3	812	12	7.83201	Single Age
12WPY44_1	1670	7.58	0.769	0.011	0.0916	0.0017	0.73618	578.8	6.4	565	10	616	30	565	10	2.38424	Rim
12WPY44_1	1304	14.76	11.23	0.23	0.4567	0.009	0.89928	2541	19	2424	40	2631	14	2631	14	7.86773	Core
12WPY44_2	1070	6.91	1.082	0.015	0.1197	0.0014	0.76776	745.4	7.1	728.5	8.3	793	20	728.5	8.3	2.26724	Single Age
12WPY44_3	72.7	0.974	1.121	0.029	0.1183	0.0028	0.61281	761	14	720	16	866	49	720	16	5.38765	Single Age
12WPY44_4	78.1	1.81	7.14	0.55	0.316	0.019	0.97318	2094	74	1760	96	2466	40	2466	40	28.6294	Single Age
12WPY44_5	1156	19.3	12.28	0.2	0.4798	0.0069	0.74247	2627	15	2526	30	2702	17	2702	17	6.51369	Single Age
12WPY44_6	195	0.358	1.538	0.031	0.1511	0.0026	0.38055	944	12	907	14	1005	29	907	14	3.91949	Single Age
12WPY44_7	124.2	0.665	1.072	0.024	0.1207	0.0023	0.42147	739	12	734	13	732	42	734	13	0.67659	Single Age
12WPY44_8	181	0.409	1.825	0.025	0.1775	0.0023	0.64094	1054	9	1053	13	1064	22	1053	13	0.0948767	Single Age
12WPY44_10	137	0.92	1.014	0.016	0.1155	0.0016	0.63625	711.6	8.2	704.3	9.3	725	26	704.3	9.3	1.02586	Single Age
12WPY44_11	405	9.7	6.48	0.25	0.37	0.011	0.92669	2054	32	2035	52	2068	26	2068	26	1.59574	Single Age
12WPY44_12	104	2.59	0.824	0.016	0.0988	0.0046	0.22682	610.4	8.9	607	27	650	110	607	27	0.557012	Rim
12WPY44_12	188.7	3.3	2.542	0.04	0.1841	0.0025	0.81377	1283	11	1089	14	1609	18	DISC	DISC	15.1208	Core
12WPY44_13	633	4.43	4.981	0.082	0.3092	0.0066	0.83243	1815	14	1735	33	1880	21	1880	21	7.71277	Single Age
12WPY44_15	138	2.08	0.997	0.014	0.1175	0.0018	0.53482	701.7	7.3	716	11	686	29	716	11	2.03791	Single Age
12WPY44_16	138.1	1.031	1.067	0.018	0.1203	0.0011	0.17917	736.8	9.1	732	6.2	737	34	732	6.2	0.651466	Single Age
12WPY44_17	163.6	1.021	1.152	0.018	0.1296	0.002	0.54878	777.3	8.5	786	11	756	30	786	11	1.11926	Single Age
12WPY44_18	302	2.1	1.215	0.023	0.1356	0.0033	0.79269	807	10	819	19	762	26	819	19	1.48699	Single Age
12WPY44_19	379	2.734	4.11	0.13	0.2248	0.0055	0.94936	1654	24	1307	29	2133	22	DISC	DISC	38.7248	Rim
12WPY44_19	126.7	1.032	9.84	0.13	0.4436	0.0082	0.62337	2420	12	2366	37	2452	25	2452	25	3.50734	Core
12WPY44_20	231	0.616	1.728	0.02	0.175	0.0016	0.54783	1018.4	7.6	1039.6	8.7	978	20	1039.6	8.7	2.0817	Single Age
12WPY44_21	121	0.971	4.019	0.082	0.2722	0.0051	0.7186	1641	17	1551	26	1777	29	1777	29	12.7181	Single Age
12WPY44_22	300	8.5	1.045	0.018	0.1192	0.0021	0.73604	726.9	8.9	726	12	716	27	726	12	0.123813	Single Age
12WPY44_23	60.9	1.18	6.68	0.14	0.3782	0.0063	0.88067	2070	18	2067	30	2057	19	2057	19	0.486145	Single Age
12WPY44_24	87.8	0.84	5.95	0.13	0.3507	0.0055	0.82694	1971	21	1938	26	2005	33	2005	33	3.34165	Single Age
12WPY44_25	255	2.28	0.901	0.031	0.1052	0.0028	0.68413	651	16	645	16	691	51	645	16	0.921659	Single Age
12WPY44_27	110.1	2.711	0.99	0.018	0.1152	0.0019	0.48799	698.2	9.1	703	11	703	39	703	11	0.687482	Single Age
12WPY44_28	2490	38	0.853	0.036	0.1008	0.0039	0.35108	626	20	619	23	658	98	619	23	1.11821	Rim
12WPY44_28	379	3.68	4.39	0.13	0.2842	0.007	0.93692	1710	25	1611	35	1801	18	1801	18	10.5497	Core
12WPY44_30	464	23.6	1.029	0.035	0.1167	0.0033	0.78943	718	18	711	19	735	50	711	19	0.97493	Rim
12WPY44_30	269.7	1.598	3.108	0.052	0.2507	0.004	0.87772	1434	13	1442	21	1426	16	1426	16	1.12202	Core
12WPY44_31	86.5	0.71	5.434	0.085	0.3064	0.0049	0.62733	1889	13	1722	24	2071	24	2071	24	16.8518	Single Age
12WPY44_32	227	0.782	1.641	0.019	0.1661	0.0016	0.59942	987.6	7.2	990.2	8.6	992	19	990.2	8.6	0.263264	Single Age
12WPY44_33	902	3.76	0.7582	0.0072	0.09246	0.00094	0.75071	573.3	4.1	570	5.5	587	14	570	5.5	0.575615	Single Age
12WPY44_34	353	2.999	3.839	0.096	0.2535	0.007	0.9212	1599	20	1456	36	1799	26	1799	26	19.0661	Single Age
12WPY44_35	575	1.817	1.4	0.074	0.1464	0.007	0.97252	880	31	878	39	894	22	878	39	0.227273	Single Age
12WPY44_36	90.7	2.26	1.581	0.025	0.1622	0.0016	0.4526	964	10	968.7	9.1	962	29	968.7	9.1	0.487552	Single Age
12WPY44_37	550	1.093	7.11	0.77	0.319	0.029	0.99325	2084	95	1770	140	2447	36	2447	36	27.6665	Single Age
12WPY44_38	537	0.605	0.844	0.019	0.1004	0.0023	0.69245	622	10	616	14	633	39	616	14	0.96463	Single Age
12WPY44_39	150.7	1.335	1.253	0.017	0.1356	0.0014	0.60118	824.3	7.7	819.8	8	829	25	819.8	8	0.545918	Single Age
12WPY44_40	212	2.31	1.129	0.016	0.1252	0.0015	0.4218	767.1	7.8	760.5	8.4	792	28	760.5	8.4	0.860383	Single Age
12WPY44_41	211.6	1.069	1.616	0.036	0.1624	0.0047	0.76686	975	14	969	26	1004	36	969	26	0.615385	Single Age
12WPY44_42	213.8	8.1	0.923	0.029	0.1091	0.0029	0.62973	664	15	667	17	662	61	667	17	0.451807	Rim
12WPY44_42	233	1.007	1.583	0.018	0.1597	0.0013	0.60502	965.5	7.5	955	7.2	999	20	955	7.2	1.08752	Core
12WPY44_43	169	0.528	0.905	0.014	0.1058	0.0012	0.34947	654.8	7.1	648.2	7.3	683	28	648.2	7.3	1.00794	Single Age
12WPY44_44	98.5	2.35	0.898	0.015	0.1052	0.0011	0.35693	651	8	645	6.5	659	33	645	6.5	0.921659	Single Age
12WPY44_45	978	4.5	7.03	0.2	0.3367	0.0075	0.97324	2114	26	1869	36	2368	15	2368	15	21.0726	Single Age
12WPY44_46	54.3	1.69	1.191	0.04	0.1272	0.0037	0.035692	796	19	772	21	840	95	772	21	3.01508	Rim
12WPY44_46	19.42	0.741	1.608	0.052	0.1586	0.0037	0.2902	977	20	948	21	1014	68	948	21	2.96827	Core
12WPY44_47	308	12.11	0.846	0.03	0.1036	0.0042	0.71435	622	16	635	25	588	46	635	25	2.09003	Rim
12WPY44_47	292.5	6.38	6.012	0.067	0.3449	0.0038	0.80939	1977.1	9.7	1910	18	2057	11	2057	11	7.14633	Core
12WPY44_48	1042	16.99	0.927	0.043	0.107	0.0031	0.90116	665	23	655	18	706	51	655	18	1.50376	Rim
12WPY44_48	374.1	5.514	1.609	0.017	0.16	0.0014	0.57994	973.5	6.6	957	7.5	1020	18	957	7.5	1.69492	Core
12WPY44_49	818	43.6	0.996	0.015	0.116	0.0019	0.66978	701.3	7.6	709	11	694	25	709	11	1.09796	Single Age
12WPY44_50	905	9.7	0.968	0.016	0.1118	0.0026	0.7582	687.2	8.2	683	15	711	33	683	15	0.611176	Rim
12WPY44_50	86.8	0.747	1.509	0.025	0.1565	0.0022	0.35507	934	10	937	12	939	35	937	12	0.321199	Core
12WPY44_51	168.5	0.687	2.172	0.027	0.184	0.0019	0.57366	1171.5	8.6	1089	10	1337	20	1089	10	7.04225	Single Age
12WPY44_52	167.4	2.12	1.264	0.021	0.1343	0.0016	0.5315	829.4	9.3	812.5	9.2	873	27	812.5	9.2	2.03762	Single Age
12WPY44_53	255.1	1.588	1.555	0.019	0.1565	0.0017	0.63995	953.2	7.6	937.4	9.7	997	22	937.4	9.7	1.65757	Single Age
12WPY44_54	121	0.778	5.766	0.098	0.3449	0.007	0.80478	1941	14	1913	34	1984	20	1984	20	3.57863	Single Age
12WPY44_55	207.6	1.273	1.613	0.025	0.1633	0.0025	0.57681	974.6	9.9	975	14	966	27	975	14	0.0410425	Single Age
12WPY44_56	108.1	0.508	5.172	0.08	0.325	0.0065	0.68536	1847	13	1813	32	1866	29	1866	29	2.8403	Single Age
12WPY44_57	204.4	1.38	1.601	0.027	0.16	0.0024	0.76813	970	11	957	13	1015	23	957	13	1.34021	Single Age
12WPY44_58	403	1.366	1.913	0.019	0.183	0.002	0.72058	1085.4	6.6	1083	11	1096	15	1083	11	0.221117	Single Age
12WPY44_59	307.1	0.436	1.675	0.014	0.1661	0.0013	0.50057	1000.4	5.5	990.8	7	1019	15	990.8	7	0.959616	Single Age
12WPY44_60	1160	36.9	0.944	0.025	0.1091	0.0022	0.80114	675	13	667	13	705	35	667	13	1.18519	Rim
12WPY44_60	359.1	0.823	1.237	0.013	0.1348	0.0012	0.51979	817.3	5.7	815.3	6.8	827	21	815.3	6.8	0.244708	Core
12WPY44_61	504	7.04	3.014	0.042	0.2062	0.0033	0.77436	1411	11	1209	17	1745	18	DISC	DISC	30.7163	Single Age
12WPY44_62	331	1.12	7.61	0.2	0.3344	0.0084	0.79935	2190	23	1857	40	2493	24	2493	24	25.5114	Single Age
12WPY44_63	126	1.608	0.897	0.014	0.106	0.0015	0.49023	650.7	7.7	649.4	8.6	668	32	649.4	8.6	0.199785	Single Age
12WPY44_65	68.2	5.7	1.123	0.026	0.1265	0.0017	0.34773	763	13	767.6	9.9	730	42	767.6	9.9	0.602883	Single Age
12WPY44_66	91.6	0.396	5.111	0.065	0.3232	0.004	0.70655	1839	10	1805	19	1885	18	1885	18	4.24403	Single Age
12WPY44_67	82.1	0.595	5.958	0.059	0.356	0.0038	0.59836	1969	8.6	1963	18	1982	15	1982	15	0.958628	Single Age
12WPY44_68	435	2.95	1.758	0.035	0.1724	0.0034	0.81785	1029	13	1025	19	1031	25	1025	19	0.388727	Single Age
12WPY44_69	423	0.808	3.6	0.046	0.1929	0.0026	0.7572	1549	10	1137	14	2148	16	DISC	DISC	26.5978	Single Age
12WPY44_70	591.3	44.2	0.8351	0.0087	0.09571	0.0008	0.67551	616.2	4.8	589.2	4.7	717	17	589.2	4.7	4.38169	Single Age
12WPY44_71	386	4.1	0.946	0.022	0.1088	0.0018	0.8319	677	11	666	11	707	27	666	11	1.62482	Single Age
12WPY44_72	317.7	5.81	1.587	0.021	0.1558	0.0022	0.69553	965.7	8.6	933	12	1021	23	933	12	3.38614	Single Age
12WPY44_73	119.8	1.352	0.708	0.011	0.0864	0.0011	0.46543	543.3	6.8	534.1	6.3	560	31	534.1	6.3	1.69336	Single Age
12WPY44_74	244	1.953	1.325	0.03	0.1369	0.0032	0.80759	860	14	829	18	952	26	829	18	3.60465	Single Age
12WPY44_75	723	1.632	5.433	0.041	0.3129	0.0024	0.8269	1889.8	6.4	1755	12	2036.1	7.4	2036.1	7.4	13.8058	Single Age
12WPY44_76	215	1.594	1.062	0.017	0.1182	0.0013	0.41738	736.2	8.2	720	7.5	773	33	720	7.5	2.20049	Single Age
12WPY44_77	278	3.74	1.085	0.023	0.1231	0.0028	0.78546	747	11	748	16	732	31	748	16	0.133869	Single Age
12WPY44_78	432	14.3	1.033	0.018	0.1162	0.0015	0.62191	721.6	8.6	708.6	8.5	742	28	708.6	8.5	1.80155	Single Age
12WPY44_79	193	1.41	6.008	0.053	0.3523	0.0031	0.72336	1976.4	7.7	1947	15	2002	12	2002	12	2.74725	Single Age
12WPY44_80	741	8.53	0.818	0.015	0.0949	0.0015	0.85994	606.1	8.2	585.4	8.5	691	23	585.4	8.5	3.41528	Single Age
12WPY44_81	299	1.661	0.984	0.013	0.1133	0.0013	0.55503	696	6.9	692.1	7.6	701	27	692.1	7.6	0.560345	Single Age
12WPY44_82	118.6	0.99	1.648	0.022	0.161	0.0017	0.58761	988.4	8.3	961.9	9.3	1037	22	961.9	9.3	2.6811	Single Age
12WPY44_83	41.6	0.875	1.752	0.048	0.1658	0.0024	0.36543	1025	17	989	13	1091	47	989	13	3.5122	Single Age
12WPY44_85	222	1.129	6.26	0.23	0.3394	0.0098	0.91027	2007	31	1882	47	2133	24	2133	24	11.7675	Single Age
12WPY44_86	64.9	2.05	1.569	0.038	0.1562	0.0025	0.51012	956	15	935	14	1020	41	935	14	2.19665	Single Age
12WPY44_88	388	2.15	0.782	0.018	0.0958	0.003	0.65271	586	10	590	18	554	55	590	18	0.682594	Single Age
12WPY44_89	47.92	0.958	0.97	0.026	0.1084	0.0025	0.41826	687	13	663	15	746	56	663	15	3.49345	Single Age
12WPY44_90	326.3	0.426	8.44	0.27	0.372	0.0098	0.8669	2273	29	2037	46	2474	26	2474	26	17.6637	Single Age
12WPY44_91	620	2	0.99	0.014	0.1138	0.0017	0.66295	698.7	7.2	694.9	9.6	707	25	694.9	9.6	0.543867	Single Age
12WPY44_92	421	3.78	1.519	0.017	0.1547	0.0016	0.73589	938.7	6.9	927.1	8.8	952	15	927.1	8.8	1.23575	Single Age
12WPY44_93	235	1.133	3.55	0.037	0.2606	0.0025	0.74192	1538.8	8	1493	13	1604	14	1604	14	6.9202	Single Age
12WPY44_94	212	1.1	1.669	0.025	0.1627	0.0027	0.61867	999.4	9.1	971	15	1049	27	971	15	2.84171	Single Age
12WPY44_95	25	1.572	0.906	0.03	0.1016	0.0021	0.22758	661	17	624	12	777	79	624	12	5.59758	Single Age
12WPY44_96	96.6	4.98	1.531	0.019	0.153	0.0018	0.48004	942.2	7.7	917.4	9.9	980	25	917.4	9.9	2.63214	Single Age
12WPY44_97	111	0.532	10.72	0.1	0.4427	0.0042	0.78948	2498.5	8.8	2363	19	2609	12	2609	12	9.4289	Single Age
12WPY44_98	257	0.967	0.894	0.011	0.105	0.0012	0.52877	648.4	6	643.8	7.1	657	26	643.8	7.1	0.709439	Single Age
12WPY44_99	115.9	0.986	1.462	0.02	0.1519	0.0014	0.36575	914.4	8.1	911.5	7.7	920	29	911.5	7.7	0.317148	Single Age
12WPY44_101	1210	9.66	0.87	0.0088	0.1018	0.0014	0.77496	635.3	4.8	625.1	8	662	17	625.1	8	1.60554	Single Age
12WPY44_103	148.5	1.662	1.752	0.025	0.1713	0.0024	0.70475	1027.1	9.1	1019	13	1046	23	1019	13	0.788628	Single Age
12WPY44_104	237	0.789	10.628	0.079	0.4452	0.0041	0.69014	2490.8	6.9	2374	18	2587	13	2587	13	8.23348	Single Age
12WPY44_105	236	3.44	1.57	0.025	0.161	0.003	0.63066	957	10	966	17	955	31	966	17	0.940439	Single Age
12WPY44_107	163.8	1.403	1.137	0.041	0.126	0.0051	0.63588	770	19	764	29	763	65	764	29	0.779221	Single Age
12WPY44_108	307.5	2.381	1.232	0.022	0.1345	0.002	0.74756	815	10	813	12	838	24	813	12	0.245399	Single Age
12WPY44_109	352	4	6.1	0.14	0.29	0.0069	0.81701	1989	20	1640	35	2370	22	DISC	DISC	30.8017	Single Age
12WPY44_110	551	5.41	1.27	0.11	0.1173	0.0082	0.75516	823	52	714	47	1140	110	DISC	DISC	13.2442	Rim
12WPY44_110	135.2	0.708	4.8	0.17	0.306	0.012	0.85733	1788	29	1720	58	1835	32	1835	32	6.26703	Core
12WPY44_111	140.2	1.382	0.973	0.02	0.1086	0.0017	0.55029	689	10	664	10	789	43	664	10	3.62845	Single Age
12WPY44_112	226	1.4	0.946	0.015	0.1124	0.0022	0.67322	675.7	8	686	13	626	35	686	13	1.52435	Single Age
12WPY44_113	250.5	1.525	1.331	0.022	0.1401	0.0019	0.60484	860	9.8	845	11	906	24	845	11	1.74419	Single Age
12WPY44_114	161	2.54	1.99	0.037	0.1784	0.0026	0.57892	1114	13	1058	14	1241	30	1058	14	5.02693	Single Age
12WPY44_115	915	2.21	0.898	0.012	0.1026	0.0017	0.76568	650.3	6.2	630	10	731	23	630	10	3.12164	Single Age
12WPY44_116	636	1.64	3.542	0.096	0.1883	0.004	0.85862	1534	21	1112	21	2177	22	DISC	DISC	27.5098	Single Age
12WPY44_117	113.3	1.17	1.834	0.03	0.1828	0.0036	0.7043	1057	11	1082	19	1005	31	1082	19	2.36518	Single Age
12WPY44_118	119.1	1.225	1.547	0.053	0.1482	0.0047	0.88582	945	21	890	26	1084	29	890	26	5.82011	Single Age
12WPY44_119	231	0.779	1.73	0.04	0.1713	0.0037	0.80587	1019	15	1019	20	1019	22	1019	20	0	Single Age
12WPY44_120	153.9	0.908	4.475	0.061	0.2881	0.0042	0.6455	1725	11	1632	21	1834	19	1834	19	11.0142	Single Age
12WPY44_123	134.4	0.4	1.932	0.03	0.1838	0.0031	0.73046	1091	10	1087	17	1086	23	1087	17	0.366636	Single Age
12WPY44_124	183	1.495	1.61	0.025	0.1604	0.0023	0.68141	973.2	9.8	959	13	992	26	959	13	1.4591	Single Age
12WPY45_1	302	1.26	12.51	0.29	0.469	0.008	0.85345	2639	23	2477	35	2746	24	2746	24	9.79607	Single Age
12WPY45_2	151.8	1.076	4.211	0.062	0.2734	0.0042	0.6803	1675	12	1558	21	1832	16	1832	16	14.9563	Single Age
12WPY45_3	158.9	0.833	6.06	0.071	0.3473	0.0042	0.6789	1983	10	1921	20	2059	12	2059	12	6.70228	Single Age
12WPY45_4	266	1.072	23.47	0.23	0.6095	0.0081	0.31867	3246.3	9.5	3075	29	3359.1	9.8	3359.1	9.8	8.45762	Single Age
12WPY45_5	375	12.1	0.822	0.025	0.0935	0.0031	0.76988	608	14	576	18	719	32	576	18	5.26316	Rim
12WPY45_5	347	1.565	1.192	0.041	0.1252	0.0042	0.84823	796	19	760	24	859	19	760	24	4.52261	Core
12WPY45_6	310	0.85	5.307	0.062	0.3345	0.0041	0.72693	1870.8	9.8	1860	20	1882	12	1882	12	1.16897	Single Age
12WPY45_7	332.8	1.3	1.725	0.021	0.1702	0.0023	0.60964	1017.2	7.7	1013	13	1027	15	1013	13	0.412898	Single Age
12WPY45_8	844	1.212	0.676	0.011	0.0824	0.0016	0.82483	524	6.7	510.6	9.7	586	19	510.6	9.7	2.55725	Single Age
12WPY45_10	241	0.975	9.37	0.19	0.4381	0.0092	0.82311	2374	18	2341	41	2403	14	2403	14	2.58011	Single Age
12WPY45_11	116.1	0.94	1.53	0.019	0.1575	0.0021	0.73797	941.8	7.8	943	11	964	12	943	11	0.127416	Single Age
12WPY45_12	127.9	3.01	0.948	0.012	0.109	0.0013	0.61075	676.7	6.3	666.6	7.8	710	15	666.6	7.8	1.49254	Single Age
12WPY45_13	89.5	1.579	0.8452	0.0088	0.10083	0.00084	0.52063	621.8	4.8	619.2	4.9	639	12	619.2	4.9	0.418141	Single Age
12WPY45_14	469.4	16.61	0.7902	0.0083	0.09489	0.00083	0.66728	591.1	4.7	584.4	4.9	628	12	584.4	4.9	1.13348	Single Age
12WPY45_15	400	1.32	10.04	0.15	0.3987	0.0053	0.79702	2441	14	2162	24	2669.4	8.6	2669.4	8.6	19.008	Single Age
12WPY45_17	352.7	0.4504	2.818	0.026	0.2303	0.0023	0.62901	1360	6.8	1336	12	1396.7	9.4	1396.7	9.4	4.34596	Single Age
12WPY45_18	80.6	1.113	6.364	0.063	0.3597	0.0045	0.70824	2026.5	8.7	1980	21	2075.4	8.2	2075.4	8.2	4.5967	Single Age
12WPY45_19	161.6	1.276	0.8499	0.0086	0.10075	0.00088	0.64615	624.4	4.7	618.8	5.2	650	11	618.8	5.2	0.896861	Single Age
12WPY45_20	191.6	1.0388	1.208	0.016	0.13	0.0014	0.65616	804	7.2	787.5	8.1	857	10	787.5	8.1	2.05224	Single Age
12WPY45_21	290	1.196	0.734	0.014	0.0895	0.0016	0.63035	558.5	8.2	552.6	9.6	585	17	552.6	9.6	1.0564	Single Age
12WPY45_22	62.3	0.7559	3.154	0.045	0.255	0.0035	0.50106	1445	11	1464	18	1427	14	1427	14	2.59285	Single Age
12WPY45_23	230	1.107	1.177	0.012	0.1301	0.0013	0.088495	789.6	5.6	788.2	7.2	796.3	9.7	788.2	7.2	0.177305	Single Age
12WPY45_24	105	0.523	0.9838	0.0098	0.1139	0.0012	0.97877	695.4	5	695.5	6.7	705	13	695.5	6.7	0.0143802	Single Age
12WPY45_25	38.43	0.3733	1.703	0.021	0.1696	0.0023	0.52818	1009	8.1	1010	12	999	15	1010	12	0.099108	Single Age
12WPY45_26	62.2	4.268	1.034	0.018	0.1189	0.0016	0.67689	720.4	9.1	724.3	8.9	695	11	724.3	8.9	0.541366	Single Age
12WPY45_27	681	1.385	4.297	0.056	0.2369	0.0027	0.72001	1692	11	1370	14	2095.8	9.9	DISC	DISC	34.6312	Single Age
12WPY45_28	298	3.25	9.94	0.16	0.4133	0.0071	0.80755	2428	15	2229	33	2598	11	2598	11	14.2032	Single Age
12WPY45_29	1250	159	0.889	0.013	0.1023	0.0018	0.7843	645.4	7	628	11	721.5	9.8	628	11	2.696	Rim
12WPY45_29	290	5.15	1.258	0.026	0.1355	0.0027	0.73995	826	12	819	15	846	16	819	15	0.847458	Core
12WPY45_30	44	1.3	1.735	0.023	0.1701	0.002	0.46403	1020.8	8.8	1013	11	1058	17	1013	11	0.764107	Single Age
12WPY45_31	191	6.2	0.954	0.014	0.111	0.0015	0.59046	680.9	7.5	678.3	8.9	702	18	678.3	8.9	0.381848	Single Age
12WPY45_32	104.3	0.6382	1.801	0.017	0.1724	0.0022	0.43053	1047.3	6.3	1025	12	1094	15	1025	12	2.12928	Single Age
12WPY45_33	345	0.508	7.72	0.27	0.335	0.01	0.96718	2193	32	1860	51	2525	12	2525	12	26.3366	Single Age
12WPY45_35	397	0.69	0.729	0.011	0.0895	0.0014	0.83231	555.5	6.3	552.6	8.4	576	11	552.6	8.4	0.522052	Single Age
12WPY45_36	574	0.454	0.778	0.013	0.0942	0.0016	0.91059	583.7	7.5	580.2	9.6	611	8.8	580.2	9.6	0.599623	Single Age
12WPY45_37	249	0.568	1.6	0.022	0.1559	0.0023	0.72977	971	8.6	934	13	1044	12	934	13	3.8105	Single Age
12WPY45_38	76.1	1.071	1.594	0.048	0.1577	0.003	0.60799	967	19	944	17	1030	28	944	17	2.37849	Single Age
12WPY45_39	71.4	0.924	11.343	0.093	0.4618	0.0041	0.74019	2551.2	7.6	2447	18	2642.1	6.1	2642.1	6.1	7.38428	Single Age
12WPY45_40	252	1.89	1.158	0.015	0.1293	0.0021	0.78365	781.4	7	784	12	776	15	784	12	0.332736	Single Age
12WPY45_41	87.2	0.902	1.564	0.048	0.1591	0.0044	0.72595	955	19	951	24	983	31	951	24	0.418848	Single Age
12WPY45_42	229.5	6.24	0.891	0.017	0.1053	0.002	0.71944	646.2	9	645	12	662	23	645	12	0.185701	Single Age
12WPY45_43	198	1.71	6.028	0.087	0.3547	0.0053	0.79646	1981	12	1956	25	2014.2	9.7	2014.2	9.7	2.88948	Single Age
12WPY45_45	273.7	1.005	1.521	0.019	0.1536	0.0014	0.68257	938.6	7.7	922.8	8.3	969	10	922.8	8.3	1.68336	Single Age
12WPY45_46	227	0.733	1.642	0.02	0.1655	0.0022	0.77477	985.8	7.7	987	12	988	19	987	12	0.121729	Single Age
12WPY45_47	950	1.76	0.993	0.03	0.1105	0.0034	0.89687	700	16	676	20	802	21	676	20	3.42857	Single Age
12WPY45_49	148.3	1.229	1.602	0.015	0.1604	0.0013	0.39334	971.3	5.7	958.9	7.3	988	11	958.9	7.3	1.27664	Single Age
12WPY45_50	2070	8.09	0.726	0.015	0.085	0.0022	0.71908	553.8	9.1	526	13	664	26	526	13	5.01986	Rim
12WPY45_50	367	25.4	1.018	0.018	0.1151	0.0016	0.64534	712.4	9	702.2	9.3	758	26	702.2	9.3	1.43178	Core
12WPY45_51	162.6	0.658	6.94	0.12	0.324	0.0052	0.87718	2102	16	1809	25	2395	11	2395	11	24.4676	Single Age
12WPY45_52	514	1.115	10.25	0.17	0.433	0.0051	0.72686	2456	16	2319	23	2569	14	2569	14	9.73141	Single Age
12WPY45_53	258	23.8	9.79	0.11	0.3997	0.0039	0.69069	2414	10	2168	18	2615.4	7.6	2615.4	7.6	17.1064	Single Age
12WPY45_54	339	2.87	7.52	0.12	0.3858	0.006	0.74994	2174	15	2108	29	2257	12	2257	12	6.60168	Single Age
12WPY45_55	336.5	3.28	0.879	0.012	0.1016	0.0014	0.53049	641.1	6.5	623.5	8.3	703	21	623.5	8.3	2.74528	Single Age
12WPY45_56	632	0.687	1.02	0.015	0.113	0.0018	0.81501	713.6	7.6	690	11	800	15	690	11	3.30717	Single Age
12WPY45_57	119.2	1.711	1.633	0.018	0.1665	0.0016	0.50308	982.6	7	993.8	8.7	974	11	993.8	8.7	1.13983	Single Age
12WPY45_58	1142	14.6	0.902	0.013	0.1018	0.0014	0.68593	652.8	6.6	624.9	8.2	760	19	624.9	8.2	4.2739	Single Age
12WPY45_59	46.6	1.067	0.869	0.014	0.1018	0.0013	0.25788	634.5	7.4	625	7.4	662	21	625	7.4	1.49724	Single Age
12WPY45_60	308	0.953	2.035	0.024	0.1879	0.0024	0.84634	1127.8	8.3	1110	13	1161.7	9.3	1110	13	1.57829	Single Age
12WPY45_61	285.8	1.388	6.602	0.087	0.3186	0.0041	0.71914	2061	12	1782	20	2341.7	9.9	2341.7	9.9	23.9014	Single Age
12WPY45_62	164.1	0.937	1.749	0.013	0.1716	0.0014	0.38544	1027.2	5	1020.8	7.6	1043.1	9.3	1020.8	7.6	0.623053	Single Age
12WPY45_63	247.5	0.956	1.691	0.03	0.1677	0.0033	0.74584	1005	11	999	18	1010	19	999	18	0.597015	Single Age
12WPY45_64	173.2	0.964	1.757	0.022	0.1693	0.0024	0.58005	1030.7	8.5	1008	13	1082	17	1008	13	2.20239	Single Age
12WPY45_65	45.65	1.202	1.145	0.023	0.1297	0.0022	0.37218	774	11	786	13	779	31	786	13	1.55039	Single Age
12WPY45_66	289	1.46	1.528	0.019	0.1551	0.0018	0.78382	941.1	7.5	929	10	976.3	9	929	10	1.28573	Single Age
12WPY45_67	417	119.2	0.768	0.019	0.0955	0.003	0.735	578	11	587	18	578	29	587	18	1.55709	Rim
12WPY45_67	244.2	2.02	1.256	0.044	0.1295	0.0041	0.84759	825	20	785	23	903	34	785	23	4.84848	Core
12WPY45_68	123.1	1.161	5.122	0.067	0.3263	0.0033	0.80856	1839	11	1820	16	1858.1	8.6	1858.1	8.6	2.05048	Single Age
12WPY45_69	185.5	1.49	1.719	0.018	0.1703	0.0019	0.45178	1015.1	6.8	1015	10	1015	15	1015	10	0.00985125	Single Age
12WPY45_70	280	0.315	0.779	0.013	0.0959	0.0018	0.81386	584.7	7.6	590	10	590	14	590	10	0.906448	Single Age
12WPY45_71	222.5	1.154	11.09	0.21	0.4501	0.0094	0.73223	2532	17	2394	42	2628	14	2628	14	8.90411	Single Age
12WPY45_72	212	2.482	0.8599	0.0088	0.1032	0.0012	0.41901	629.8	4.8	633.2	7	620	20	633.2	7	0.539854	Single Age
12WPY45_73	236	1.77	0.945	0.012	0.1115	0.0014	0.67088	675.2	6.4	681.1	8.2	673	15	681.1	8.2	0.873815	Single Age
12WPY45_74	86.1	0.745	0.7843	0.009	0.09551	0.00085	0.26813	587.8	5.1	588	5	596	15	588	5	0.0340252	Single Age
12WPY45_75	79.1	0.4477	5.205	0.063	0.3308	0.0035	0.61711	1853	10	1842	17	1873	10	1873	10	1.6551	Single Age
12WPY45_76	216	0.875	1.327	0.04	0.1397	0.0036	0.86666	856	17	843	21	889	19	843	21	1.51869	Single Age
12WPY45_78	446	0.529	2.482	0.033	0.1804	0.0021	0.74059	1268	10	1069	11	1616	12	DISC	DISC	15.694	Single Age
12WPY45_79	215	0.317	0.8283	0.0098	0.1003	0.0012	0.53622	612.4	5.5	616.2	7.2	607	15	616.2	7.2	0.620509	Single Age
12WPY45_80	211	0.352	9.23	0.3	0.389	0.011	0.93477	2359	29	2113	50	2573	12	2573	12	17.878	Single Age
12WPY45_81	714	1.155	5.299	0.063	0.321	0.0066	0.42014	1870	9.8	1794	32	1960	21	1960	21	8.46939	Single Age
12WPY45_82	191.7	0.524	1.675	0.024	0.1647	0.0027	0.70056	998.6	9.3	983	15	1031	15	983	15	1.56219	Single Age
12WPY45_83	229	46.8	0.676	0.048	0.0819	0.0081	0.94398	524	29	507	48	582	24	507	48	3.24427	Rim
12WPY45_83	528	1.108	1.571	0.023	0.1538	0.0023	0.85151	958.2	9	922	13	1055.1	7.9	922	13	3.77792	Core
12WPY45_86	245	0.49	0.8551	0.0086	0.10085	0.00091	0.56567	627.3	4.7	619.4	5.3	660	12	619.4	5.3	1.25937	Single Age
12WPY45_87	49.7	1.38	6.45	0.13	0.3711	0.007	0.91401	2039	18	2033	33	2042.2	8.8	2042.2	8.8	0.450495	Single Age
12WPY45_88	207.9	0.676	1.832	0.024	0.1768	0.0024	0.63264	1056.6	8.7	1050	13	1072	15	1050	13	0.624645	Single Age
12WPY45_89	272.6	1.415	0.952	0.068	0.0991	0.0017	0.7134	664	27	609	9.7	900	120	609	9.7	8.28313	Rim
12WPY45_89	335	3.88	0.992	0.024	0.1093	0.0016	0.58204	699	12	668.6	9.3	804	30	668.6	9.3	4.34907	Core
12WPY45_90	1920	3.53	0.976	0.03	0.1018	0.0032	0.65954	691	15	625	19	952	33	625	19	9.55137	Rim
12WPY45_90	270	0.655	1.615	0.028	0.1622	0.0037	0.70478	976	11	969	21	980	18	969	21	0.717213	Core
12WPY45_91	317	3.69	0.928	0.02	0.107	0.0028	0.71654	667	10	655	16	699	32	655	16	1.7991	Single Age
12WPY45_92	38.9	2.19	6.6	0.11	0.381	0.0073	0.77368	2062	15	2080	34	2042	20	2042	20	1.86092	Single Age
12WPY45_93	281	3	6.68	0.15	0.3642	0.0077	0.86902	2067	20	2001	36	2122.9	9.3	2122.9	9.3	5.74215	Single Age
12WPY45_94	243.1	0.8102	0.8458	0.0066	0.1013	0.001	0.43136	622.2	3.6	622.2	6	618	12	622.2	6	0	Single Age
12WPY45_95	60.7	0.98	1.774	0.043	0.1742	0.0031	0.50649	1029	12	1035	17	1031	24	1035	17	0.58309	Single Age
12WPY45_96	1860	24.9	0.801	0.018	0.0928	0.0036	0.72896	597	10	572	21	724	38	572	21	4.1876	Rim
12WPY45_96	272	0.674	1.678	0.033	0.1636	0.0029	0.62368	999	13	977	16	1072	26	977	16	2.2022	Core
12WPY45_97	326.4	1.919	0.879	0.013	0.1035	0.0019	0.5092	640.1	6.8	635	11	654	18	635	11	0.796751	Single Age
12WPY45_98	52.6	1.038	5.377	0.074	0.3409	0.005	0.67769	1880	12	1895	25	1863	17	1863	17	1.71766	Single Age
12WPY45_99	93.6	1.015	6.224	0.065	0.3537	0.004	0.7038	2008.4	9.4	1952	19	2063.4	8.2	2063.4	8.2	5.39886	Single Age
12WPY45_100	380	1.43	1.407	0.02	0.1484	0.0024	0.65104	891.4	8.6	892	14	905	18	892	14	0.0673098	Single Age
12WPY45_101	440	2.67	0.983	0.035	0.112	0.0031	0.87771	695	18	685	18	724	26	685	18	1.43885	Single Age
12WPY45_102	397	0.276	1.554	0.019	0.1544	0.0018	0.64113	951.6	7.5	926	10	1017	14	926	10	2.69021	Single Age
12WPY45_103	159	1.007	1.524	0.021	0.1572	0.0021	0.7019	939.7	8.6	941	12	948	21	941	12	0.138342	Single Age
12WPY45_104	225.3	1.453	0.823	0.019	0.0978	0.0028	0.55596	610	10	601	16	666	32	601	16	1.47541	Rim
12WPY45_104	223	1.93	1.555	0.026	0.1596	0.0028	0.57966	952	10	955	16	950	21	955	16	0.315126	Core
12WPY45_105	111.9	0.758	1.716	0.015	0.1683	0.0017	0.50897	1014.3	5.6	1002.6	9.2	1047	11	1002.6	9.2	1.1535	Single Age
12WPY45_106	285	0.887	1.667	0.022	0.1598	0.0017	0.66105	995.5	8.4	955.5	9.5	1068	14	955.5	9.5	4.01808	Single Age
12WPY45_107	195.5	0.96	1.608	0.022	0.1611	0.0021	0.63997	972.7	8.4	965	12	997	15	965	12	0.791611	Single Age
12WPY45_108	256	0.695	1.778	0.034	0.1738	0.0043	0.36687	1037	13	1033	24	1022	18	1033	24	0.385728	Single Age
12WPY45_109	178	1.011	1.557	0.025	0.1545	0.0026	0.73564	952	10	926	15	1007	14	926	15	2.73109	Single Age
12WPY45_110	297	1.135	0.997	0.015	0.112	0.0021	0.74379	701.8	7.4	684	12	757	16	684	12	2.53634	Single Age
12WPY45_111	281	1.812	5.779	0.063	0.3229	0.0044	0.56498	1942.9	9.4	1804	22	2090	12	2090	12	13.6842	Single Age
12WPY45_112	119.9	1.658	1.589	0.028	0.1597	0.002	0.56944	965	11	955	11	980	18	955	11	1.03627	Single Age
12WPY45_113	188	0.758	1.798	0.028	0.1759	0.0024	0.82033	1044	10	1044	13	1047	10	1044	13	0	Single Age
12WPY45_114	64.2	0.5489	3.126	0.03	0.2473	0.002	0.5001	1438.7	7.3	1425	11	1452.6	9.9	1452.6	9.9	1.90004	Single Age
12WPY45_116	86.9	0.606	1.206	0.014	0.1302	0.0013	0.56734	802.9	6.3	788.8	7.7	837	12	788.8	7.7	1.75613	Single Age
12WPY45_117	329	1.202	1.779	0.019	0.1739	0.002	0.70749	1037.5	7.1	1034	11	1068	12	1034	11	0.337349	Single Age
12WPY45_118	145.8	3.56	0.874	0.012	0.1044	0.0014	0.22629	637.3	6.5	640.1	8	625	14	640.1	8	0.439354	Single Age
12WPY45_119	154.8	1.41	0.912	0.011	0.1083	0.0011	0.59761	658.6	6.2	662.7	6.3	658	14	662.7	6.3	0.622533	Single Age
12WPY45_120	236	1.57	1.764	0.04	0.1719	0.0038	0.7476	1032	15	1022	21	1058	18	1022	21	0.968992	Single Age
12WPY45_121	72.7	0.488	9.98	0.15	0.4061	0.0054	0.77892	2432	14	2196	25	2622.5	9.7	2622.5	9.7	16.2631	Single Age
12WPY45_122	466	4.3	0.78	0.021	0.0943	0.0021	0.60392	585	12	581	13	630	19	581	13	0.683761	Rim
12WPY45_122	515	1.236	1.01	0.02	0.1134	0.0023	0.9142	709	10	692	13	775	16	692	13	2.39774	Core
12WPY45_123	374	2.449	1.626	0.031	0.1611	0.0028	0.76928	980	12	963	15	1024	18	963	15	1.73469	Single Age
12WPY45_124	642	0.984	0.691	0.013	0.0822	0.0015	0.89507	532.7	7.9	508.9	8.8	643	15	508.9	8.8	4.46781	Single Age
12WPY46_1	233.5	1.122	1.29	0.016	0.1397	0.0018	0.52471	841.7	7.4	843	10	824	27	843	10	0.154449	Single Age
12WPY46_2	455	5.52	10.32	0.28	0.444	0.013	0.7428	2470	27	2375	59	2538	35	2538	35	6.42238	Single Age
12WPY46_3	60	1.811	0.951	0.017	0.1111	0.0013	0.36507	677.8	8.7	680.1	7.5	670	35	680.1	7.5	0.339333	Single Age
12WPY46_4	217	2.58	1.815	0.041	0.1771	0.0042	0.69994	1050	15	1051	23	1047	31	1051	23	0.0952381	Single Age
12WPY46_5	258	3.67	1.2	0.028	0.1325	0.0026	0.76955	801	13	802	15	792	29	802	15	0.124844	Single Age
12WPY46_6	73.6	1.088	0.864	0.017	0.1028	0.0013	0.46189	632.4	9.3	630.7	7.8	640	41	630.7	7.8	0.268817	Single Age
12WPY46_7	172	14.2	0.851	0.038	0.1024	0.0043	0.45845	628	20	634	23	580	100	634	23	0.955414	Rim
12WPY46_7	337	1.41	6.89	0.18	0.3905	0.0095	0.90245	2095	24	2124	44	2068	18	2068	18	2.70793	Core
12WPY46_8	131.9	0.966	1.659	0.024	0.1663	0.0024	0.68661	993.4	9.2	992	13	992	23	992	13	0.14093	Single Age
12WPY46_9	53.3	0.3491	4.981	0.097	0.31	0.0055	0.70976	1813	17	1740	27	1886	25	1886	25	7.74125	Single Age
12WPY46_10	125	1.282	1.981	0.046	0.1961	0.0048	0.68391	1109	15	1157	27	1017	38	1157	27	4.32822	Single Age
12WPY46_11	478	0.646	0.829	0.01	0.0995	0.0016	0.58247	612.7	5.6	611.1	9.5	626	25	611.1	9.5	0.261139	Single Age
12WPY46_12	103	0.965	0.764	0.014	0.0945	0.0016	0.5578	577.3	7.6	581.8	9.7	584	34	581.8	9.7	0.779491	Single Age
12WPY46_13	31.7	1.51	1.229	0.064	0.1269	0.0061	0.62434	815	28	782	31	883	90	782	31	4.04908	Single Age
12WPY46_14	238	10.8	9.97	0.18	0.4314	0.0048	0.83554	2436	17	2315	21	2529	17	2529	17	8.46184	Single Age
12WPY46_15	267.7	1.358	1.256	0.027	0.1359	0.0032	0.7565	827	12	821	18	841	33	821	18	0.725514	Single Age
12WPY46_16	151	1.22	1.153	0.036	0.1259	0.003	0.1448	778	17	764	17	797	52	764	17	1.79949	Rim
12WPY46_16	126.8	0.5293	1.443	0.024	0.1488	0.0023	0.44626	906.5	9.9	894	13	926	36	894	13	1.37893	Core
12WPY46_17	327	2.11	1.701	0.022	0.1689	0.002	0.72048	1008.5	8.2	1006	11	1016	20	1006	11	0.247893	Single Age
12WPY46_18	43.3	2.78	11.65	0.2	0.4603	0.0074	0.77656	2575	16	2440	33	2680	20	2680	20	8.95522	Single Age
12WPY46_19	14	0.522	0.324	0.058	0.0348	0.0045	0.69477	282	45	221	28	880	270	DISC	DISC	21.6312	Rim
12WPY46_19	25.44	1.274	0.877	0.035	0.107	0.003	0.25935	638	19	655	18	540	100	655	18	2.66458	Core
12WPY46_20	106	2.006	1.139	0.024	0.1254	0.0025	0.47872	771	11	761	14	803	46	761	14	1.29702	Single Age
12WPY46_21	28.4	29.7	0.891	0.03	0.103	0.0027	0.064263	645	16	632	16	640	91	632	16	2.0155	Rim
12WPY46_21	23.7	4.04	1.44	0.14	0.1589	0.0075	0.13106	901	58	950	42	770	220	950	42	5.4384	Core
12WPY46_22	710	1.382	1.244	0.06	0.1336	0.007	0.68144	828	31	808	40	844	93	808	40	2.41546	Rim
12WPY46_22	200.1	0.85	1.654	0.031	0.1677	0.0039	0.74173	990	12	999	21	973	27	999	21	0.909091	Core
12WPY46_23	104	0.88	4.374	0.094	0.2867	0.0064	0.75331	1709	18	1623	32	1819	26	1819	26	10.7752	Single Age
12WPY46_24	241	1.29	1.847	0.03	0.1813	0.0031	0.79148	1063	11	1074	17	1038	22	1074	17	1.03481	Single Age
12WPY46_25	118.8	0.518	1.688	0.029	0.171	0.0031	0.6693	1003	11	1020	16	978	30	1020	16	1.69492	Single Age
12WPY46_26	298	4.21	3.97	0.16	0.2537	0.0088	0.94239	1622	33	1455	45	1857	23	1857	23	21.6478	Single Age
12WPY46_27	290.6	46.6	0.898	0.024	0.1049	0.0031	0.58505	650	13	643	18	653	56	643	18	1.07692	Rim
12WPY46_27	400	0.949	1.349	0.055	0.1374	0.0062	0.7333	865	24	829	35	949	61	829	35	4.16185	Core
12WPY46_28	532	6.89	2.63	0.1	0.1832	0.0056	0.84165	1317	29	1083	30	1683	37	DISC	DISC	17.7677	Single Age
12WPY46_29	253	0.846	1.685	0.03	0.1679	0.0032	0.74716	1002	12	1000	17	1012	26	1000	17	0.199601	Single Age
12WPY46_30	303	2.25	5.12	0.11	0.3168	0.0076	0.73221	1837	17	1777	36	1903	28	1903	28	6.62112	Single Age
12WPY46_31	392	0.891	0.874	0.011	0.1028	0.0015	0.59892	638.3	6.2	630.4	8.8	647	30	630.4	8.8	1.23766	Single Age
12WPY46_32	52.2	1.761	14.66	0.22	0.5164	0.0079	0.69331	2793	15	2682	34	2866	19	2866	19	6.4201	Single Age
12WPY46_33	141.2	0.489	1.71	0.03	0.1686	0.0032	0.73035	1014	11	1004	17	1045	29	1004	17	0.986193	Single Age
12WPY46_34	243.2	1.365	6.582	0.096	0.3665	0.0067	0.81308	2059	13	2012	32	2115	16	2115	16	4.86998	Single Age
12WPY46_35	62.1	1.887	1.087	0.027	0.1211	0.0032	0.6293	747	13	736	18	783	48	736	18	1.47256	Single Age
12WPY46_36	1150	1.35	0.95	0.013	0.1108	0.0019	0.73923	677.7	6.6	677	11	678	25	677	11	0.103291	Single Age
12WPY46_37	286	1.71	1.46	0.034	0.1484	0.0034	0.74551	918	13	891	19	946	37	891	19	2.94118	Single Age
12WPY46_38	223	2.219	0.8235	0.0091	0.0978	0.0011	0.5024	609.7	5.1	601.6	6.4	641	25	601.6	6.4	1.32852	Single Age
12WPY46_39	262	3.42	1.713	0.025	0.1689	0.0025	0.56771	1013.9	9.2	1006	14	1021	28	1006	14	0.77917	Single Age
12WPY46_40	90.2	0.752	1.754	0.024	0.1736	0.003	0.52714	1027.8	8.8	1032	17	1041	31	1032	17	0.40864	Single Age
12WPY46_41	354	0.99	1.018	0.022	0.1159	0.0022	0.63719	712	11	707	12	741	31	707	12	0.702247	Single Age
12WPY46_42	114	0.38	1.711	0.018	0.1692	0.0016	0.3829	1013.2	6.7	1007.7	8.8	1011	22	1007.7	8.8	0.542835	Single Age
12WPY46_43	699	2.16	0.874	0.015	0.1026	0.0021	0.7868	637.3	8.2	629	12	650	26	629	12	1.30237	Single Age
12WPY46_44	84.1	0.922	1.645	0.036	0.1652	0.003	0.7129	986	14	986	17	992	31	986	17	0	Single Age
12WPY46_45	149.8	0.525	0.835	0.015	0.1003	0.0019	0.55924	615.6	8.1	616	11	612	37	616	11	0.0649773	Single Age
12WPY46_46	100.3	0.863	1.663	0.034	0.1633	0.0033	0.59484	995	13	974	18	1019	37	974	18	2.11055	Single Age
12WPY46_47	156	1.74	1.854	0.029	0.1795	0.0032	0.64232	1064	10	1064	17	1076	30	1064	17	0	Single Age
12WPY46_48	345	2.831	13.97	0.23	0.5037	0.0052	0.76837	2747	15	2629	22	2841	17	2841	17	7.46216	Single Age
12WPY46_49	195	0.544	1.644	0.039	0.165	0.0043	0.75142	985	15	984	24	995	34	984	24	0.101523	Single Age
12WPY46_50	369	0.978	0.838	0.011	0.1002	0.0014	0.60112	617.8	6.3	615.7	8	634	25	615.7	8	0.339916	Single Age
12WPY46_51	169	0.648	6.111	0.085	0.3619	0.0056	0.6889	1992	12	1990	27	1999	21	1999	21	0.450225	Single Age
12WPY46_52	120	2.91	0.891	0.015	0.1058	0.0017	0.55511	646.3	8	648	10	628	33	648	10	0.263036	Single Age
12WPY46_53	104.9	1.44	1.482	0.032	0.1535	0.0028	0.64996	922	13	920	16	971	40	920	16	0.21692	Rim
12WPY46_53	267	2.66	4.5	0.17	0.2913	0.0093	0.60274	1729	31	1648	46	1852	49	1852	49	11.0151	Core
12WPY46_54	241	1.999	1.94	0.023	0.1856	0.0024	0.72821	1094.3	8	1097	13	1083	18	1097	13	0.246733	Single Age
12WPY46_55	140.5	1.19	0.962	0.017	0.1106	0.0018	0.57533	685.8	8.9	676	10	693	30	676	10	1.42899	Single Age
12WPY46_56	327.4	0.841	11.78	0.18	0.4821	0.0071	0.86905	2585	15	2535	31	2618	13	2618	13	3.17036	Single Age
12WPY46_57	272	7.11	13.15	0.31	0.543	0.013	0.94359	2686	22	2793	55	2615	13	2615	13	6.80688	Single Age
12WPY46_58	164.8	0.996	1.745	0.024	0.1722	0.0024	0.56615	1026.9	9.3	1024	13	1020	29	1024	13	0.282403	Single Age
12WPY46_59	267	1.31	11.57	0.16	0.4817	0.0083	0.87531	2571	13	2533	36	2594	15	2594	15	2.35158	Single Age
12WPY46_60	122	0.52	0.869	0.014	0.103	0.0015	0.34794	634.7	7.4	632.1	8.7	643	38	632.1	8.7	0.409642	Single Age
12WPY46_61	80.2	0.622	1.727	0.026	0.174	0.0019	0.51143	1019.1	9.7	1034	10	1003	26	1034	10	1.46207	Single Age
12WPY46_62	33.8	1.606	1.6	0.033	0.1623	0.0028	0.45179	971	13	969	16	999	43	969	16	0.205973	Single Age
12WPY46_63	41.6	1.031	0.899	0.02	0.1052	0.0016	0.31644	650	11	644.5	9.5	687	47	644.5	9.5	0.846154	Single Age
12WPY46_64	126.7	2.347	6.684	0.072	0.3648	0.0049	0.7227	2070.8	9.3	2007	23	2134	16	2134	16	5.95127	Single Age
12WPY46_65	397	1.088	4.73	0.14	0.2987	0.0093	0.95665	1768	26	1682	46	1887	21	1887	21	10.8638	Single Age
12WPY46_66	561	2.64	0.883	0.04	0.0961	0.0034	0.795	641	21	591	20	817	62	591	20	7.80031	Rim
12WPY46_66	52.2	1.013	1.406	0.042	0.1431	0.0051	0.63395	890	18	861	29	983	53	861	29	3.25843	Core
12WPY46_67	138.9	1.083	4.39	0.11	0.2965	0.0092	0.80966	1708	22	1672	46	1746	36	1746	36	4.23826	Single Age
12WPY46_68	453	8.4	2.029	0.055	0.1631	0.004	0.80775	1127	18	973	22	1444	30	DISC	DISC	13.6646	Single Age
12WPY46_69	140.2	0.727	5.12	0.065	0.323	0.0049	0.73579	1838	11	1804	24	1878	19	1878	19	3.94036	Single Age
12WPY46_70	693	1.09	11.67	0.51	0.492	0.02	0.9559	2563	42	2570	86	2560	22	2560	22	0.390625	Single Age
12WPY46_71	84.4	0.856	1.519	0.03	0.1547	0.0029	0.64894	938	12	927	16	954	33	927	16	1.17271	Single Age
12WPY46_72	262	6.6	1.721	0.023	0.1704	0.0023	0.70432	1015.7	8.5	1014	13	1020	21	1014	13	0.167372	Single Age
12WPY46_73	527	0.861	1.145	0.019	0.121	0.002	0.78783	774.3	8.9	736	12	877	23	736	12	4.9464	Single Age
12WPY46_74	93.3	0.49	4.66	0.1	0.2954	0.006	0.85263	1756	19	1675	31	1864	21	1864	21	10.1395	Single Age
12WPY46_75	226	0.822	5.287	0.081	0.3207	0.005	0.86032	1867	13	1792	24	1954	14	1954	14	8.29069	Single Age
12WPY46_76	186.7	1.676	1.723	0.018	0.1674	0.0016	0.499	1016.6	6.7	997.4	9	1055	20	997.4	9	1.88865	Single Age
12WPY46_77	339	1.12	1.252	0.045	0.1359	0.004	0.88636	824	21	821	23	849	35	821	23	0.364078	Single Age
12WPY46_78	148.5	0.907	3.178	0.049	0.2449	0.0044	0.57671	1451	12	1411	23	1481	28	1481	28	4.72654	Single Age
12WPY46_79	263.1	1.66	0.9403	0.0099	0.1097	0.0013	0.66382	672.8	5.2	671.2	7.5	671	20	671.2	7.5	0.237812	Single Age
12WPY46_80	116.2	1.41	14.23	0.2	0.5267	0.0085	0.70842	2764	13	2726	36	2782	19	2782	19	2.01294	Single Age
12WPY46_81	23.21	0.338	0.771	0.029	0.0932	0.0024	0.46684	581	16	574	14	657	72	574	14	1.20482	Single Age
12WPY46_82	920	5.9	10.62	0.35	0.444	0.016	0.95489	2487	31	2361	70	2593	16	2593	16	8.94717	Single Age
12WPY46_83	79.7	1.358	5.31	0.13	0.2892	0.0047	0.65388	1867	21	1637	23	2128	34	2128	34	23.0733	Single Age
12WPY46_84	225	0.857	4.77	0.29	0.286	0.018	0.95749	1756	52	1609	88	1960	29	1960	29	17.9082	Single Age
12WPY46_85	312	0.849	0.937	0.014	0.1109	0.0017	0.58351	670.7	7.4	677.7	9.6	653	29	677.7	9.6	1.04369	Single Age
12WPY46_86	176.1	0.414	0.91	0.013	0.1063	0.0014	0.44336	656.5	6.9	651.3	8	691	31	651.3	8	0.792079	Single Age
12WPY46_87	221	2.038	1.617	0.028	0.164	0.003	0.78828	977	11	979	16	967	25	979	16	0.204708	Single Age
12WPY46_88	146.5	1.253	7.088	0.085	0.3946	0.0057	0.72377	2121	11	2143	27	2109	15	2109	15	1.61214	Single Age
12WPY46_89	129	1.65	0.989	0.028	0.1142	0.0028	0.77553	700	14	697	16	731	34	697	16	0.428571	Single Age
12WPY46_90	172.8	1.621	0.947	0.019	0.1108	0.0021	0.54948	676	10	679	12	682	40	679	12	0.443787	Single Age
12WPY46_91	234.8	0.667	0.832	0.017	0.0992	0.0018	0.64365	613.9	9.3	609	11	637	35	609	11	0.798176	Single Age
12WPY46_92	104	1.326	1.39	0.026	0.1435	0.0024	0.46921	885	11	864	14	920	37	864	14	2.37288	Single Age
12WPY46_93	191.6	1.509	1.708	0.032	0.1688	0.0029	0.70196	1010	12	1005	16	1023	27	1005	16	0.49505	Single Age
12WPY46_94	112.9	0.533	1.929	0.023	0.1881	0.0026	0.59407	1092.7	7.8	1111	14	1071	25	1111	14	1.67475	Single Age
12WPY46_95	1171	7.5	0.928	0.01	0.1066	0.0013	0.78687	666.1	5.5	652.9	7.8	705	16	652.9	7.8	1.98168	Single Age
12WPY46_96	196	2.22	5.05	0.11	0.3186	0.0076	0.88522	1828	19	1781	37	1872	17	1872	17	4.86111	Single Age
12WPY46_97	89.8	1	1.881	0.038	0.1754	0.0027	0.639	1075	13	1042	15	1137	31	1042	15	3.06977	Single Age
12WPY46_98	19	0.666	1.694	0.049	0.1686	0.0038	0.3574	1004	18	1004	21	980	64	1004	21	0	Single Age
12WPY46_99	120	47.5	0.743	0.028	0.0888	0.0014	0.41097	563	16	548.5	8.2	584	59	548.5	8.2	2.57549	Rim
12WPY46_99	188	0.897	1.629	0.034	0.1603	0.0031	0.54305	981	13	958	17	1025	40	958	17	2.34455	Core
12WPY46_100	461	2.06	11.57	0.21	0.4524	0.0085	0.76188	2571	18	2404	38	2699	21	2699	21	10.93	Single Age
12WPY46_101	93.5	1.267	1.681	0.023	0.1655	0.0024	0.5131	1000.6	8.6	987	13	1038	29	987	13	1.35918	Single Age
12WPY46_102	94.6	0.891	1.059	0.02	0.1213	0.002	0.57507	733.6	9.8	738	12	727	34	738	12	0.599782	Single Age
12WPY46_103	71.5	3.45	0.85	0.022	0.1015	0.0024	0.68735	624	12	623	14	630	41	623	14	0.160256	Single Age
12WPY46_104	251	1.53	5.75	0.11	0.3454	0.006	0.75895	1941	16	1912	29	1962	22	1962	22	2.54842	Single Age
12WPY46_105	163	2.12	12.35	0.23	0.538	0.011	0.77684	2634	17	2772	46	2523	24	2523	24	9.8692	Single Age
12WPY46_106	467	5.47	1.794	0.021	0.174	0.0021	0.79409	1042.7	7.5	1034	11	1061	14	1034	11	0.834372	Single Age
12WPY46_107	187.6	2.36	0.92	0.015	0.1068	0.0016	0.48703	662.6	7.9	654.2	9.6	675	33	654.2	9.6	1.26773	Single Age
12WPY46_108	186.2	4.78	0.888	0.016	0.1055	0.0017	0.63954	644.5	8.5	646.7	9.9	626	27	646.7	9.9	0.34135	Single Age
12WPY46_109	301	2.187	1.423	0.03	0.1355	0.0025	0.75125	900	12	819	14	1090	32	819	14	9	Single Age
12WPY46_110	790	0.67	1.317	0.022	0.1377	0.0031	0.669	854	10	834	17	898	33	834	17	2.34192	Single Age
12WPY46_111	520	2.001	0.868	0.012	0.1028	0.0016	0.72807	635	6.5	631.8	9.1	659	23	631.8	9.1	0.503937	Single Age
12WPY46_112	458	2.406	11.5	0.2	0.4713	0.0088	0.79995	2562	16	2487	38	2609	19	2609	19	4.67612	Single Age
12WPY46_113	39.9	1.465	0.863	0.02	0.1022	0.0016	0.19895	631	11	627.3	9.4	647	56	627.3	9.4	0.586371	Single Age
12WPY46_114	194.4	0.793	2.622	0.095	0.1918	0.006	0.9011	1302	27	1130	32	1616	27	DISC	DISC	13.2104	Single Age
12WPY46_115	61.3	0.602	1.625	0.044	0.1529	0.0032	0.24042	977	17	919	18	1108	49	919	18	5.93654	Single Age
12WPY46_116	110.9	1.379	1.705	0.025	0.1668	0.0026	0.71491	1009.7	9.4	994	14	1035	22	994	14	1.55492	Single Age
12WPY46_117	96.1	1.85	15.61	0.19	0.5273	0.008	0.81491	2852	11	2733	35	2951	13	2951	13	7.38733	Single Age
12WPY46_118	22.8	0.632	1.216	0.034	0.1277	0.0031	0.35776	811	16	774	18	896	58	774	18	4.56227	Single Age
12WPY46_119	251	5.11	1.091	0.019	0.1208	0.0022	0.77031	748.4	9.3	735	12	793	24	735	12	1.79049	Single Age
12WPY46_120	477	5.24	0.971	0.016	0.1116	0.0019	0.65468	688.3	8.3	682	11	696	27	682	11	0.915299	Single Age
12WPY46_121	244	2.022	0.7572	0.0097	0.0924	0.0011	0.50595	572.1	5.6	569.7	6.6	593	28	569.7	6.6	0.419507	Single Age
12WPY46_122	129	0.56	1.68	0.024	0.1678	0.0021	0.596	1001.2	9.3	1000	12	1001	23	1000	12	0.119856	Single Age
12WPY46_123	177.2	1.87	0.923	0.016	0.1069	0.0018	0.084183	663.3	8.5	654	10	682	39	654	10	1.40208	Single Age
12WPY46_124	342	0.601	1.661	0.038	0.1617	0.0039	0.78524	992	14	965	22	1031	30	965	22	2.72177	Single Age
12WPY47_1	455	2.05	11.26	0.16	0.4455	0.0061	0.85144	2546	14	2379	28	2686.6	8.6	2686.6	8.6	11.4494	Single Age
12WPY47_2	326	1.48	0.879	0.018	0.102	0.002	0.94943	638	10	626	11	680	10	626	11	1.88088	Single Age
12WPY47_3	310	0.56	1.46	0.016	0.1477	0.0019	0.87829	913.6	6.8	888	11	967	6.8	888	11	2.8021	Single Age
12WPY47_4	970	9.7	0.742	0.013	0.0906	0.0021	0.96411	562.9	7.5	559	12	590	11	559	12	0.692841	Single Age
12WPY47_5	226	2.124	4.963	0.054	0.3127	0.0033	0.73422	1812.7	9.2	1754	16	1873	9.4	1873	9.4	6.35344	Single Age
12WPY47_6	491	3.18	0.892	0.033	0.099	0.0023	0.92094	645	18	608	14	759	33	608	14	5.73643	Single Age
12WPY47_7	223.7	1.86	8.53	0.14	0.365	0.0057	0.90952	2287	15	2005	27	2548.7	6.2	2548.7	6.2	21.3324	Single Age
12WPY47_8	367	0.848	0.818	0.0078	0.0977	0.0012	0.7908	606.8	4.4	601	7	633	11	601	7	0.955834	Single Age
12WPY47_9	327	1.88	0.968	0.024	0.1097	0.002	0.91393	686	12	671	12	736	20	671	12	2.18659	Single Age
12WPY47_10	512.4	13	0.7761	0.0067	0.09205	0.00082	0.62457	583.6	3.9	567.6	4.8	641.3	8.9	567.6	4.8	2.7416	Single Age
12WPY47_11	292	1.2	1.727	0.018	0.1681	0.0018	0.7372	1018.3	6.6	1001.6	9.7	1045.5	8.4	1001.6	9.7	1.63999	Single Age
12WPY47_12	685	3.72	0.8263	0.0052	0.09755	0.0007	0.70747	611.8	2.9	600	4.1	653	5.8	600	4.1	1.92873	Single Age
12WPY47_13	561	5.89	3.58	0.13	0.2205	0.0058	0.97444	1542	27	1283	31	1900	16	DISC	DISC	32.4737	Single Age
12WPY47_14	182	0.676	1.732	0.022	0.172	0.0017	0.71099	1020.2	8.2	1022.9	9.3	1027	14	1022.9	9.3	0.264654	Single Age
12WPY47_15	508	2.528	0.8326	0.0064	0.09911	0.00077	0.59798	615	3.5	609.2	4.5	645.6	8.8	609.2	4.5	0.943089	Single Age
12WPY47_16	331	2.9	4.869	0.092	0.2993	0.0056	0.93575	1802	16	1687	28	1938.6	5.9	1938.6	5.9	12.9784	Single Age
12WPY47_17	54.3	1.43	1.617	0.024	0.1583	0.0018	0.41093	977.3	9.2	947.1	9.8	1034	18	947.1	9.8	3.09015	Single Age
12WPY47_18	258	0.853	1.658	0.016	0.1659	0.0015	0.71562	992.4	6.3	989.2	8.1	991.2	9.5	989.2	8.1	0.322451	Single Age
12WPY47_19	151	0.666	1.719	0.014	0.1676	0.0013	0.65012	1015.3	5.1	998.6	7.1	1044.8	8.3	998.6	7.1	1.64483	Single Age
12WPY47_20	116.3	2.06	6.56	0.18	0.2915	0.0072	0.95864	2052	24	1648	36	2468.6	9.2	DISC	DISC	33.2415	Single Age
12WPY47_21	71.9	10.03	0.802	0.012	0.09775	0.00096	0.57465	597.5	6.7	601.2	5.6	589	19	601.2	5.6	0.619247	Single Age
12WPY47_22	35.8	3.85	0.74	0.034	0.0906	0.0035	0.79482	561	20	558	20	587	28	558	20	0.534759	Single Age
12WPY47_23	100.9	2.31	0.978	0.012	0.1134	0.0011	0.71266	692.4	6	692.3	6.4	697.7	7.2	692.3	6.4	0.0144425	Single Age
12WPY47_24	270	2.27	1.269	0.029	0.1364	0.0026	0.94444	831	13	824	15	855	11	824	15	0.842359	Single Age
12WPY47_25	262.1	0.484	6.011	0.059	0.3553	0.0033	0.83922	1978	8.4	1959	16	2001	6.4	2001	6.4	2.09895	Single Age
12WPY47_26	242	3.94	1.072	0.035	0.1207	0.0031	0.95583	737	17	734	18	744	17	734	18	0.407056	Single Age
12WPY47_27	250	0.93	1.654	0.02	0.1643	0.0019	0.83605	990.5	7.9	982	10	997.9	6.9	982	10	0.858152	Single Age
12WPY47_28	157.8	0.782	1.757	0.015	0.1737	0.0015	0.83069	1029.3	5.5	1032.4	8	1029	6.5	1032.4	8	0.301176	Single Age
12WPY47_29	929	13.37	17.5	0.19	0.5093	0.0047	0.7693	2962	10	2654	20	3176.3	8.1	3176.3	8.1	16.4437	Single Age
12WPY47_30	586.7	0.5003	0.8572	0.0065	0.10058	0.00067	0.51487	628.5	3.5	617.8	3.9	667.7	8.7	617.8	3.9	1.70247	Single Age
12WPY47_31	642	41.5	0.8736	0.0053	0.10276	0.00077	0.61707	637.5	2.9	630.5	4.5	667.2	8.2	630.5	4.5	1.09804	Single Age
12WPY47_33	139.1	0.484	1.715	0.023	0.169	0.0024	0.77202	1013.5	8.7	1006	13	1044	10	1006	13	0.74001	Single Age
12WPY47_34	82.8	0.96	1.278	0.021	0.138	0.0019	0.58721	835.3	9.6	833	11	851	17	833	11	0.27535	Single Age
12WPY47_35	141.2	1.701	12.24	0.17	0.5016	0.0084	0.91914	2622	13	2625	37	2626.8	6.9	2626.8	6.9	0.0685244	Single Age
12WPY47_36	160.5	0.698	1.686	0.015	0.1652	0.0015	0.46944	1002.9	5.8	985.5	8.2	1036	12	985.5	8.2	1.73497	Single Age
12WPY47_37	363	6.3	5.658	0.042	0.3295	0.0024	0.70747	1924.6	6.3	1836	11	2026.8	7.8	2026.8	7.8	9.41385	Single Age
12WPY47_38	123.2	1.261	5.096	0.058	0.3008	0.0024	0.46249	1835.1	9.6	1695	12	1999	12	1999	12	15.2076	Single Age
12WPY47_39	152	1.009	1.549	0.035	0.156	0.0033	0.9519	952	14	934	18	989	11	934	18	1.89076	Single Age
12WPY47_40	378	3.95	0.936	0.026	0.1062	0.0019	0.63865	670	13	651	11	749	40	651	11	2.83582	Single Age
12WPY47_41	192	1.168	1.336	0.024	0.1389	0.0012	0.32253	861	10	838.6	6.6	933	21	838.6	6.6	2.60163	Single Age
12WPY47_42	42.9	0.4462	1.747	0.028	0.1693	0.0021	0.82775	1025	11	1008	12	1074	17	1008	12	1.65854	Single Age
12WPY47_43	156.7	0.745	3.05	0.2	0.225	0.01	0.98115	1406	52	1305	53	1594	41	1594	41	18.1305	Single Age
12WPY47_45	321	0.626	0.8675	0.0073	0.10322	0.00089	0.68331	634	4	634.1	5	631	12	634.1	5	0.0157729	Single Age
12WPY47_46	152.6	0.647	1.83	0.017	0.1779	0.0017	0.79046	1056	6	1055.1	9.4	1056.8	6	1055.1	9.4	0.0852273	Single Age
12WPY47_47	54.1	0.612	11.32	0.12	0.4674	0.0065	0.88999	2549	10	2472	28	2622.6	6.2	2622.6	6.2	5.74239	Single Age
12WPY47_48	219	5.6	5.02	0.052	0.3042	0.003	0.85491	1822.3	8.7	1712	15	1955.1	5.6	1955.1	5.6	12.4341	Single Age
12WPY47_50	981	3.55	0.875	0.018	0.0981	0.0014	0.93326	640	10	603	8.3	780	15	603	8.3	5.78125	Single Age
12WPY47_51	169	0.733	2.6	0.2	0.1857	0.0052	0.95424	1269	61	1097	29	1540	120	DISC	DISC	13.554	Single Age
12WPY47_52	635	0.462	0.8247	0.0069	0.0958	0.001	0.77892	610.5	3.8	589.4	6.1	699	11	589.4	6.1	3.45618	Single Age
12WPY47_54	94.8	1.483	1.184	0.022	0.1323	0.002	0.86322	792	10	801	11	760	14	801	11	1.13636	Single Age
12WPY47_55	120.6	2.14	0.79	0.016	0.0923	0.0018	0.76994	590.3	9.2	570	11	658	13	570	11	3.43893	Single Age
12WPY47_56	80.2	0.476	5.445	0.057	0.3439	0.0035	0.791	1891.3	8.9	1905	17	1876.4	6	1876.4	6	1.5242	Single Age
12WPY47_57	78.5	1.35	0.833	0.013	0.0999	0.0013	0.66038	614.8	7.1	613.7	7.7	628	16	613.7	7.7	0.17892	Single Age
12WPY47_58	74.9	1.317	5.15	0.14	0.2816	0.0064	0.59536	1844	24	1598	32	2147	29	2147	29	25.5706	Single Age
12WPY47_59	75.4	1.22	0.84	0.025	0.093	0.0015	0.23731	618	13	573.4	8.6	829	70	573.4	8.6	7.21683	Single Age
12WPY47_60	459	4.68	6.261	0.085	0.3233	0.0045	0.64013	2014	13	1806	22	2223	17	2223	17	18.7584	Single Age
12WPY47_61	141.5	0.843	15.866	0.093	0.5484	0.0034	0.75064	2868.5	5.6	2818	14	2909.8	3.8	2909.8	3.8	3.15486	Single Age
12WPY47_62	93	1.184	1.306	0.013	0.1398	0.0014	0.60509	848	5.9	843.2	8	870	11	843.2	8	0.566038	Single Age
12WPY47_63	297.4	2.66	5.147	0.082	0.3122	0.0044	0.93115	1843	14	1751	22	1954.4	8.3	1954.4	8.3	10.4073	Single Age
12WPY47_64	88.3	0.655	0.859	0.012	0.1011	0.0012	0.5697	629.4	6.5	620.6	7	659	15	620.6	7	1.39816	Single Age
12WPY47_65	162.6	0.941	1.3	0.011	0.1334	0.0011	0.73309	845.3	4.7	807.1	6	949.2	7.1	807.1	6	4.51911	Single Age
12WPY47_67	556	9.88	0.8709	0.0077	0.10172	0.00096	0.76762	635.9	4.2	624.5	5.6	690.1	7.2	624.5	5.6	1.79273	Single Age
12WPY47_68	212	1.46	1.326	0.014	0.1381	0.0015	0.66955	857.8	6.3	833.6	8.3	919	12	833.6	8.3	2.82117	Single Age
12WPY47_69	309	9.7	0.892	0.011	0.1031	0.0011	0.62937	647.9	6	632.6	6.2	711	12	632.6	6.2	2.36148	Single Age
12WPY47_70	251	1.106	0.774	0.016	0.0915	0.002	0.88624	581.4	9.2	565	12	656	14	565	12	2.82078	Single Age
12WPY47_71	117	10.4	0.7936	0.0093	0.0948	0.001	0.51629	592.9	5.3	583.9	5.9	631	16	583.9	5.9	1.51796	Single Age
12WPY47_72	369	17	3.46	0.35	0.232	0.017	0.99071	1511	87	1348	89	1725	77	1725	77	21.8551	Single Age
12WPY47_73	256	2.03	0.918	0.011	0.10493	0.00086	0.30041	660.7	6	643.2	5	720	20	643.2	5	2.64871	Single Age
12WPY47_74	119	1.427	0.9012	0.0081	0.10621	0.00076	0.46106	652.7	4.3	650.7	4.4	668	12	650.7	4.4	0.306419	Single Age
12WPY47_75	347	3.91	1.049	0.021	0.1198	0.0021	0.88358	727	11	729	12	708	15	729	12	0.275103	Single Age
12WPY47_76	218	109	0.883	0.029	0.106	0.0029	0.81735	642	15	654	18	632	35	654	18	1.86916	Rim
12WPY47_76	130.2	1.135	2.683	0.046	0.2126	0.003	0.869	1323	13	1243	16	1459	10	1459	10	14.8047	Core
12WPY47_77	1636	0.847	1.325	0.011	0.1349	0.0011	0.84703	856.4	4.9	815.9	6.1	974.4	6.1	815.9	6.1	4.7291	Single Age
12WPY47_78	110.3	1.316	7.03	0.26	0.3077	0.0094	0.97102	2115	33	1726	47	2506	15	DISC	DISC	31.1253	Single Age
12WPY47_79	203	0.793	1.73	0.01	0.16993	0.00089	0.44685	1020.1	3.6	1011.7	4.9	1035.8	8.8	1011.7	4.9	0.823449	Single Age
12WPY47_80	189.8	2.67	4.63	0.27	0.302	0.014	0.99179	1742	49	1697	70	1807	22	1807	22	6.08744	Single Age
12WPY47_81	591	4.7	1.442	0.043	0.1488	0.0033	0.98142	903	19	894	19	952	13	894	19	0.996678	Single Age
12WPY47_82	393	3.22	5.88	0.11	0.3192	0.0036	0.79418	1956	17	1786	17	2141	24	2141	24	16.581	Single Age
12WPY47_83	449	8.14	0.788	0.011	0.0944	0.0015	0.88312	589.9	6.5	581.5	8.6	627	7.6	581.5	8.6	1.42397	Single Age
12WPY47_84	235	2.2	0.8551	0.0095	0.1026	0.0012	0.50368	627.2	5.2	629.4	7	642	13	629.4	7	0.350765	Single Age
12WPY47_85	986	16.7	8.752	0.069	0.4232	0.002	0.78404	2312.1	7.2	2275	9.2	2343.8	9.7	2343.8	9.7	2.9354	Single Age
12WPY47_86	162	1.54	1.112	0.017	0.1191	0.0015	0.78497	758.4	8.4	725.2	8.9	858	14	725.2	8.9	4.37764	Single Age
12WPY47_87	632	6.5	4.82	0.056	0.2981	0.0051	0.81738	1788	9.8	1681	25	1923.4	7.9	1923.4	7.9	12.6027	Single Age
12WPY47_88	279	6.33	1.788	0.01	0.1748	0.0011	0.66223	1040.9	3.7	1038.5	6	1052.3	5.6	1038.5	6	0.23057	Single Age
12WPY47_89	255	1.55	1.415	0.041	0.1477	0.0034	0.94968	893	17	888	19	902	16	888	19	0.55991	Single Age
12WPY47_90	304	1.036	1.272	0.01	0.1371	0.0014	0.64148	832.9	4.6	828.1	7.7	858.3	8.5	828.1	7.7	0.5763	Single Age
12WPY47_91	384	1.978	2.688	0.032	0.2205	0.0032	0.82155	1324.8	8.7	1284	17	1387.8	9.4	1387.8	9.4	7.47946	Single Age
12WPY47_92	1030	9.3	0.597	0.015	0.069	0.0016	0.91379	474.9	9.5	430.2	9.5	713	15	430.2	9.5	9.41251	Single Age
12WPY47_93	1276	5.02	0.706	0.012	0.0792	0.0015	0.91657	541.8	6.9	491.1	8.7	755	11	491.1	8.7	9.3577	Single Age
12WPY47_94	517	3.25	9.971	0.077	0.4056	0.0034	0.80356	2432.5	7.3	2194	15	2636	5.3	2636	5.3	16.7678	Single Age
12WPY47_95	102	2.993	6.096	0.067	0.3428	0.0028	0.82642	1989	9.6	1900	14	2080	7.2	2080	7.2	8.65385	Single Age
12WPY47_96	357	2.713	0.889	0.012	0.1044	0.0013	0.72287	645.2	6.4	640.3	7.4	659	11	640.3	7.4	0.759454	Single Age
12WPY47_97	196	2.488	0.985	0.011	0.1171	0.001	0.70378	696.1	5.9	714	6	635	11	714	6	2.57147	Single Age
12WPY47_98	397	2.35	12.54	0.15	0.491	0.0057	0.91997	2645	11	2574	25	2705.2	4.3	2705.2	4.3	4.84992	Single Age
12WPY47_99	207.9	2.744	8.77	0.12	0.4112	0.0046	0.72097	2314	12	2220	21	2390	16	2390	16	7.11297	Single Age
12WPY47_100	13.38	0.0911	4.03	0.31	0.2528	0.0072	0.80617	1604	33	1451	37	1834	40	1834	40	20.8833	Single Age
12WPY47_101	256	1.41	5.025	0.059	0.3035	0.0033	0.90011	1823	10	1708	16	1950.6	4.6	1950.6	4.6	12.4372	Single Age
12WPY47_102	274	1.727	4.852	0.062	0.292	0.0033	0.84122	1793	11	1651	16	1963.6	8.7	1963.6	8.7	15.9197	Single Age
12WPY47_103	198.1	0.758	1.2	0.011	0.1329	0.0012	0.052964	801.4	4.6	804.6	7	790	15	804.6	7	0.399301	Single Age
12WPY47_104	81.7	0.511	5.681	0.044	0.3404	0.0026	0.75028	1929.2	6.8	1889	13	1966.8	6.4	1966.8	6.4	3.95566	Single Age
12WPY47_105	717	14.8	3.693	0.089	0.2303	0.0055	0.92812	1568	19	1335	29	1902	11	1902	11	29.8107	Single Age
12WPY47_106	125.4	1.137	4.653	0.029	0.3105	0.0016	0.59606	1758.5	5.3	1742.8	8.1	1782.1	6.1	1782.1	6.1	2.20526	Single Age
12WPY47_107	578	2.619	5.204	0.084	0.2951	0.0047	0.91975	1852	14	1666	23	2064.4	6.1	2064.4	6.1	19.2986	Single Age
12WPY47_108	173.8	2.862	0.9526	0.0092	0.11014	0.00075	0.42176	679.9	4.7	673.6	4.3	693	11	673.6	4.3	0.926607	Single Age
12WPY47_109	8.7	23.9	0.706	0.043	0.0722	0.0048	0.42035	543	25	448	29	1123	70	DISC	DISC	17.4954	Single Age
12WPY47_110	270.7	1.586	8.12	0.14	0.3939	0.005	0.91838	2243	16	2140	23	2329	15	2329	15	8.11507	Single Age
12WPY47_111	96.8	2.124	1.752	0.019	0.1684	0.0021	0.58585	1027.5	7.1	1003	12	1066	15	1003	12	2.38443	Single Age
12WPY47_112	124.2	1.83	1.474	0.021	0.1515	0.0013	0.89382	918.9	9	909.3	7.6	954	11	909.3	7.6	1.04473	Single Age
12WPY47_113	40.5	0.707	1.749	0.024	0.1726	0.0017	0.3737	1025.9	8.7	1026.4	9.1	1037	13	1026.4	9.1	0.0487377	Single Age
12WPY47_114	100.5	1.09	11.87	0.12	0.4789	0.0043	0.90243	2593.3	9.8	2522	19	2636.1	7.6	2636.1	7.6	4.32836	Single Age
12WPY47_115	1033	21.7	4.452	0.05	0.2916	0.0032	0.80068	1721.3	9.4	1649	16	1804	12	1804	12	8.59202	Single Age
12WPY47_116	207.4	1.52	1.434	0.025	0.1471	0.002	0.91223	903	10	885	11	961	15	885	11	1.99336	Single Age
12WPY47_117	125.1	0.847	12.68	0.1	0.4929	0.0036	0.60404	2656.6	7.7	2583	15	2711.6	7.9	2711.6	7.9	4.74259	Single Age
12WPY47_118	78.3	0.766	1.622	0.025	0.1627	0.0016	0.22121	978.2	9.5	971.7	9.1	1010	20	971.7	9.1	0.664486	Single Age
12WPY47_119	211.5	1.772	0.9102	0.0063	0.10695	0.00073	0.475	657.1	3.3	655	4.3	668	10	655	4.3	0.319586	Single Age
12WPY47_120	368	1.023	0.851	0.014	0.1025	0.0017	0.92003	624.6	7.8	629	10	615.1	7.1	629	10	0.704451	Single Age
12WPY47_121	223.8	2.48	6.616	0.055	0.3782	0.0032	0.83185	2061.1	7.3	2068	15	2059.1	5.3	2059.1	5.3	0.432228	Single Age
12WPY47_122	22.5	1.006	1.494	0.028	0.151	0.0021	0.3182	927	11	906	12	994	26	906	12	2.26537	Single Age
12WPY47_123	902	2.393	1.627	0.012	0.1583	0.0011	0.82583	980.5	4.7	947.3	6.2	1052.5	8.1	947.3	6.2	3.38603	Single Age
12WPY47_124	440	5.3	1.529	0.015	0.1554	0.0015	0.86584	941.7	6.1	930.8	8.2	968.6	5.7	930.8	8.2	1.15748	Single Age
12WPY55_1	268	3.74	0.957	0.0076	0.1109	0.001	0.53361	681.6	4	678	5.9	688.8	8	678	5.9	0.528169	Single Age
12WPY55_3	102.3	1.406	1.3267	0.0092	0.1428	0.0014	0.41608	857.3	4	860.2	7.8	842.2	8.6	860.2	7.8	0.338271	Single Age
12WPY55_4	579	1.55	9.62	0.29	0.405	0.011	0.94591	2400	27	2190	53	2576	10	2576	10	14.9845	Single Age
12WPY55_5	55.6	0.628	11.95	0.11	0.4926	0.0052	0.90175	2601.6	9.2	2581	22	2613.8	6.5	2613.8	6.5	1.25488	Single Age
12WPY55_6	432	1.674	0.9509	0.0086	0.1105	0.0013	0.80734	678.9	4.5	675.7	7.5	686.1	9.4	675.7	7.5	0.471351	Single Age
12WPY55_7	95.3	1.209	0.967	0.01	0.1135	0.0015	0.23986	687	5.4	693	8.5	667	21	693	8.5	0.873362	Single Age
12WPY55_8	75.9	0.819	0.787	0.018	0.0951	0.0014	0.56574	589	10	585.4	8.4	622	34	585.4	8.4	0.611205	Single Age
12WPY55_9	319	4.81	0.956	0.024	0.1129	0.0034	0.81683	681	12	689	20	682	19	689	20	1.17474	Rim
12WPY55_9	162.2	0.859	1.284	0.025	0.136	0.0022	0.78315	840	11	822	12	890	11	822	12	2.14286	Core
12WPY55_10	406	98.5	0.8781	0.0066	0.10495	0.00087	0.55773	639.9	3.6	643.3	5.1	631.9	8.8	643.3	5.1	0.531333	Single Age
12WPY55_11	249.2	0.774	5.533	0.037	0.3351	0.0032	0.67749	1905.5	5.8	1863	15	1947.5	7.3	1947.5	7.3	4.3389	Single Age
12WPY55_12	147	10.79	0.824	0.016	0.0975	0.0018	0.64344	610.1	8.8	600	11	668	17	600	11	1.65547	Rim
12WPY55_12	143.3	1.28	1.061	0.026	0.1155	0.003	0.80167	734	13	704	17	827	25	704	17	4.08719	Core
12WPY55_13	1080	15.3	0.831	0.014	0.0977	0.0018	0.80085	614.7	8.2	601	10	663.1	9.4	601	10	2.22873	Single Age
12WPY55_14	205	0.8034	1.027	0.014	0.1173	0.0019	0.44573	717.5	6.8	715	11	734	22	715	11	0.348432	Single Age
12WPY55_15	187.8	8.22	0.8307	0.0097	0.0984	0.0011	0.66571	613.7	5.4	605.1	6.2	646	12	605.1	6.2	1.40134	Single Age
12WPY55_16	373	5.43	0.856	0.013	0.1011	0.0012	0.47232	627.6	7	622.6	7.7	640	19	622.6	7.7	0.796686	Rim
12WPY55_16	274	3.36	1.222	0.013	0.1212	0.0011	0.61973	810.6	6	737.2	6.5	1015	14	737.2	6.5	9.05502	Core
12WPY55_17	136.7	1.042	7.34	0.1	0.3959	0.0043	0.81703	2154	12	2149	20	2157	11	2157	11	0.370885	Single Age
12WPY55_18	380	1.138	0.715	0.017	0.089	0.0022	0.82205	548	10	549	13	549	19	549	13	0.182482	Rim
12WPY55_18	157.8	1.028	0.7624	0.0092	0.094	0.0011	0.42501	575.3	5.3	580.4	6.7	553	16	580.4	6.7	0.886494	Core
12WPY55_19	79.2	0.385	0.7341	0.0089	0.092	0.0013	0.64732	559.4	5.1	567.2	7.6	526	13	567.2	7.6	1.39435	Single Age
12WPY55_21	61.6	0.6255	1.799	0.022	0.1771	0.0025	0.64503	1044.7	8	1051	14	1038	12	1051	14	0.603044	Single Age
12WPY55_24	277.4	0.783	1.878	0.019	0.1813	0.002	0.89873	1073.8	6.9	1074	11	1068.2	6.2	1074	11	0.0186254	Single Age
12WPY55_25	52.9	0.956	1.23	0.019	0.136	0.0022	0.73918	813.8	8.9	822	12	798	19	822	12	1.00762	Single Age
12WPY55_26	61.8	1.514	0.984	0.013	0.1136	0.0011	0.4802	695.5	6.4	693.4	6.2	704	15	693.4	6.2	0.301941	Single Age
12WPY55_27	94.5	1.447	0.867	0.014	0.1035	0.0018	0.53532	633.4	7.6	635	11	620	23	635	11	0.252605	Single Age
12WPY55_28	240.2	1.324	1.0386	0.0082	0.1212	0.00094	0.64744	723.1	4.1	737.4	5.4	692.5	7.6	737.4	5.4	1.9776	Single Age
12WPY55_29	58.5	1.151	0.879	0.012	0.1018	0.0012	0.56699	641.3	6.4	625	6.9	689	16	625	6.9	2.54171	Single Age
12WPY55_30	70	0.611	0.7928	0.009	0.09709	0.00091	0.49676	592.5	5.1	597.3	5.4	573	16	597.3	5.4	0.810127	Single Age
12WPY55_31	196	1.934	12.051	0.082	0.4894	0.0036	0.64688	2609	6.2	2568	16	2639.2	6.4	2639.2	6.4	2.69779	Single Age
12WPY55_32	359	1.75	1.768	0.017	0.1727	0.002	0.78113	1033.4	6.4	1027	11	1046.2	9	1027	11	0.619315	Single Age
12WPY55_33	172.6	0.693	1.41	0.021	0.1497	0.0018	0.24226	892.7	8.7	899.3	9.9	875	14	899.3	9.9	0.73933	Single Age
12WPY55_34	93	0.933	0.8429	0.009	0.10159	0.00092	0.46385	620.5	4.9	623.7	5.4	624	14	623.7	5.4	0.515713	Single Age
12WPY55_35	103	0.824	5.156	0.089	0.3275	0.0062	0.80069	1846	14	1829	31	1888	12	1888	12	3.125	Single Age
12WPY55_37	303.5	1.528	0.991	0.015	0.1147	0.0021	0.68017	698.8	7.6	700	12	693	21	700	12	0.171723	Single Age
12WPY55_38	170	0.586	1.789	0.017	0.1766	0.0019	0.75588	1042.6	6.2	1048	10	1020.6	8.8	1048	10	0.517936	Single Age
12WPY55_39	115.1	0.4065	2.467	0.021	0.2156	0.0023	0.69102	1262.1	6.1	1260	12	1260.2	7.1	1260.2	7.1	0.0158705	Single Age
12WPY55_40	81.3	0.5327	1.874	0.026	0.1821	0.0021	0.61781	1071.5	9.2	1079	12	1040	15	1079	12	0.699953	Single Age
12WPY55_41	246	1.8	6.948	0.093	0.3865	0.0044	0.87334	2106	11	2106	20	2096.9	8.3	2096.9	8.3	0.433974	Single Age
12WPY55_42	31.41	0.959	1.158	0.021	0.1283	0.0017	0.17148	780	9.7	777.8	9.6	780	20	777.8	9.6	0.282051	Single Age
12WPY55_43	307	0.6538	1.94	0.016	0.1859	0.0016	0.77549	1094.9	5.5	1098.9	8.5	1092.4	7.6	1098.9	8.5	0.36533	Single Age
12WPY55_44	312.3	0.95	0.82	0.013	0.0991	0.0019	0.42706	608.1	7.5	609	11	622	29	609	11	0.148002	Single Age
12WPY55_45	65.4	1.528	0.728	0.012	0.092	0.0013	0.516	555.1	6.8	567.4	7.9	513	18	567.4	7.9	2.21582	Single Age
12WPY55_46	110.7	6.6	0.953	0.047	0.112	0.0042	0.85545	679	25	684	25	699	20	684	25	0.736377	Rim
12WPY55_46	119	0.566	1.324	0.014	0.1424	0.0018	0.4947	856.3	6.3	858	10	846	15	858	10	0.198529	Core
12WPY55_47	53.2	2.485	0.887	0.011	0.1052	0.0011	0.59246	644.3	6.1	645	6.6	638	17	645	6.6	0.108645	Single Age
12WPY55_48	108.5	0.46	1.525	0.023	0.1552	0.0017	0.71037	941.1	9.3	930.1	9.3	977	15	930.1	9.3	1.16884	Single Age
12WPY55_49	150.7	0.982	6.427	0.043	0.372	0.003	0.68861	2035.7	5.9	2039	14	2042.8	6.4	2042.8	6.4	0.186019	Single Age
12WPY55_50	92.1	1.522	0.851	0.011	0.1012	0.0011	0.46909	624.9	5.9	621.7	6.3	633	14	621.7	6.3	0.512082	Single Age
12WPY55_51	109	0.919	1.808	0.026	0.1724	0.0017	0.65647	1047.7	9.3	1025.2	9.6	1080	20	1025.2	9.6	2.14756	Single Age
12WPY55_52	211.6	1.213	0.8959	0.0085	0.1068	0.0011	0.67467	649.3	4.5	653.9	6.3	642.3	8.2	653.9	6.3	0.708455	Single Age
12WPY55_53	396	24	0.929	0.01	0.1091	0.0014	0.74337	666.7	5.5	667.3	7.9	668	11	667.3	7.9	0.0899955	Single Age
12WPY55_54	225	5.11	1.572	0.026	0.1566	0.0026	0.70214	959	10	938	14	997	19	938	14	2.18978	Single Age
12WPY55_56	278.7	1.944	2.751	0.025	0.2304	0.0026	0.66509	1342.9	6.7	1337	13	1354.2	7	1354.2	7	1.27012	Single Age
12WPY55_57	265	0.85	1.468	0.043	0.153	0.0042	0.92524	921	16	918	23	918	16	918	23	0.325733	Single Age
12WPY55_58	61.9	0.763	5.374	0.089	0.3418	0.0064	0.67584	1880	14	1895	31	1866	23	1866	23	1.55413	Single Age
12WPY55_59	613	1.58	0.517	0.022	0.0638	0.0016	0.83236	423	14	398.9	9.6	532	13	398.9	9.6	5.6974	Rim
12WPY55_59	97.1	2.609	0.8823	0.0095	0.1041	0.0011	0.51566	642.1	5.1	638.6	6.2	649	13	638.6	6.2	0.545086	Core
12WPY55_60	328.6	1.208	11.7	0.15	0.4752	0.0058	0.94287	2580	12	2505	25	2629.6	6.7	2629.6	6.7	4.73836	Single Age
12WPY55_61	580	3.73	0.5939	0.0066	0.07679	0.00071	0.57726	473.2	4.2	476.9	4.2	451	12	476.9	4.2	0.78191	Single Age
12WPY55_62	500	8.84	0.8213	0.0082	0.09482	0.00088	0.6759	608.6	4.6	584	5.2	708.6	7.5	584	5.2	4.04206	Single Age
12WPY55_63	556	48.7	0.95	0.012	0.1095	0.0016	0.82005	678.2	6.3	669.9	9.5	690.9	9.7	669.9	9.5	1.22383	Single Age
12WPY55_64	114.3	0.893	12.14	0.11	0.4934	0.004	0.62155	2616.2	8.2	2585	17	2643.5	9	2643.5	9	2.21298	Single Age
12WPY55_65	189.2	1.792	6.2	0.062	0.3681	0.0044	0.72783	2003.8	8.7	2022	20	1987.7	7.2	1987.7	7.2	1.72561	Single Age
12WPY55_66	136	0.629	5.284	0.054	0.3374	0.0034	0.79589	1865.6	8.8	1874	16	1863.9	6.6	1863.9	6.6	0.541875	Single Age
12WPY55_67	116.2	1.17	0.6771	0.0073	0.0854	0.00088	0.41319	524.9	4.4	528.2	5.2	521	13	528.2	5.2	0.628691	Single Age
12WPY55_68	171	1.24	1.021	0.01	0.118	0.0013	0.57215	714.1	5.1	719.2	7.4	699	11	719.2	7.4	0.714186	Single Age
12WPY55_69	141	3.2	1.457	0.041	0.1513	0.0036	0.86638	911	17	908	20	902	20	908	20	0.329308	Single Age
12WPY55_70	109	0.8097	0.8841	0.0094	0.1057	0.001	0.46095	643	5.1	647.5	6.1	614	12	647.5	6.1	0.699844	Single Age
12WPY55_71	294	5.2	0.853	0.011	0.1023	0.0014	0.82324	626.5	6.4	627.6	7.9	632	11	627.6	7.9	0.175579	Single Age
12WPY55_72	102.9	0.668	5.151	0.089	0.3198	0.007	0.70779	1844	15	1788	34	1909	15	1909	15	6.3384	Single Age
12WPY55_73	122.6	0.859	1.123	0.023	0.1271	0.002	0.60696	764	11	771	11	741	23	771	11	0.91623	Single Age
12WPY55_75	72.97	1.853	0.887	0.011	0.1054	0.001	0.57543	645.4	5.9	645.9	5.9	648	15	645.9	5.9	0.0774713	Single Age
12WPY55_76	300.9	0.9269	11.587	0.081	0.4899	0.0038	0.84203	2571.2	6.5	2570	17	2573.6	3	2573.6	3	0.139882	Single Age
12WPY55_79	285	1.643	1.647	0.022	0.1633	0.0023	0.73729	987.7	8.5	975	13	1013	11	975	13	1.28582	Single Age
12WPY55_80	671	1.938	0.8071	0.0099	0.0936	0.0012	0.77339	600.7	5.5	576.8	6.8	689	14	576.8	6.8	3.97869	Single Age
12WPY55_81	832	3.17	0.64	0.025	0.0804	0.0035	0.89296	502	15	498	21	532	25	498	21	0.796813	Rim
12WPY55_81	376.2	0.619	0.733	0.014	0.0908	0.0019	0.53165	557.9	8.4	560	11	564	28	560	11	0.376412	Core
12WPY55_82	161.5	0.944	5.448	0.055	0.3402	0.0033	0.88083	1891.8	8.9	1887	16	1898.9	8.1	1898.9	8.1	0.626679	Single Age
12WPY55_83	83.1	0.965	1.023	0.014	0.1161	0.0016	0.169	714.9	7.2	708.1	9.2	731	16	708.1	9.2	0.951182	Single Age
12WPY55_84	175	0.713	0.8128	0.0083	0.0976	0.0011	0.56674	603.8	4.7	600.5	6.5	614	13	600.5	6.5	0.546539	Single Age
12WPY55_85	152.5	0.7062	0.9961	0.0082	0.1161	0.001	0.30671	701.7	4.2	707.8	6	692	13	707.8	6	0.869317	Single Age
12WPY55_86	58.7	1.28	0.913	0.015	0.1072	0.0015	0.65948	659.5	8.4	656.4	9	689	17	656.4	9	0.470053	Single Age
12WPY55_87	104.2	0.858	6.473	0.068	0.3692	0.0047	0.79449	2041.5	9.3	2025	22	2053.6	8	2053.6	8	1.39268	Single Age
12WPY55_88	571	1.066	0.854	0.0058	0.10062	0.00072	0.54689	627.2	3.3	618	4.2	663.5	8.2	618	4.2	1.46684	Single Age
12WPY55_89	298.5	1.674	12.735	0.074	0.5041	0.0041	0.73313	2660	5.5	2631	18	2676.1	5.8	2676.1	5.8	1.68529	Single Age
12WPY55_90	155.7	3.31	0.9319	0.0092	0.1091	0.0011	0.57142	668.4	4.8	667.4	6.7	656	12	667.4	6.7	0.149611	Single Age
12WPY55_91	261	0.939	1.199	0.012	0.1317	0.0016	0.64251	799.7	5.6	797.7	9.2	807	10	797.7	9.2	0.250094	Single Age
12WPY55_93	184.2	1.374	1.771	0.015	0.1734	0.0017	0.6916	1034.7	5.6	1030.8	9.2	1040.9	9.8	1030.8	9.2	0.376921	Single Age
12WPY55_94	354	4.12	12.68	0.24	0.5079	0.0098	0.83563	2655	18	2655	40	2665.8	8.7	2665.8	8.7	0.405132	Single Age
12WPY55_95	35.4	0.899	1.382	0.021	0.1393	0.0015	0.28585	882	8.9	840.4	8.6	968	20	840.4	8.6	4.71655	Single Age
12WPY55_96	88.6	1.175	1.348	0.02	0.1343	0.0028	0.64565	866.6	8.7	812	16	998	17	812	16	6.30048	Single Age
12WPY55_97	314	1.257	1.294	0.017	0.1384	0.0021	0.84765	842.7	7.7	835	12	853	9	835	12	0.91373	Single Age
12WPY55_98	105.2	1.615	6.02	0.15	0.3589	0.0085	0.94233	1977	22	1976	40	1980.4	8.2	1980.4	8.2	0.222177	Single Age
12WPY55_99	364	0.659	1.687	0.015	0.1666	0.002	0.37291	1003.5	5.8	993	11	1023.9	9.8	993	11	1.04634	Single Age
12WPY55_100	551	2.66	0.853	0.028	0.0961	0.0029	0.87736	625	16	591	17	744	33	591	17	5.44	Single Age
12WPY55_101	174	1.43	1.142	0.065	0.1248	0.0036	0.77621	773	31	758	20	823	44	758	20	1.94049	Rim
12WPY55_101	62.57	0.5795	1.678	0.025	0.1661	0.0026	0.65994	999.5	9.5	990	15	1021	14	990	15	0.950475	Core
12WPY55_102	157	0.575	0.9021	0.0091	0.1067	0.001	0.49671	652.6	4.9	653.2	6	647	14	653.2	6	0.0919399	Single Age
12WPY55_103	186	0.5107	1.241	0.024	0.1349	0.0021	0.6012	819	11	815	12	827	33	815	12	0.4884	Single Age
12WPY55_104	230.8	3.73	1.272	0.028	0.1372	0.0021	0.85334	832	13	830	12	841	18	830	12	0.240385	Single Age
12WPY55_105	64.2	0.524	1.777	0.024	0.1738	0.0022	0.3884	1036.5	8.9	1033	12	1041	14	1033	12	0.337675	Single Age
12WPY55_106	28.8	0.783	1.775	0.03	0.1759	0.0028	0.71577	1035	11	1047	16	1047	17	1047	16	1.15942	Single Age
12WPY55_107	140.9	1.439	0.997	0.029	0.1157	0.0052	0.76439	702	15	706	30	687	17	706	30	0.569801	Rim
12WPY55_107	145.7	0.808	1.371	0.019	0.1433	0.0015	0.61433	876.1	8.1	863	8.6	897	17	863	8.6	1.49526	Core
12WPY55_108	389	1.009	0.9593	0.0083	0.1107	0.0012	0.67339	682.8	4.3	676.8	6.7	700	10	676.8	6.7	0.878735	Single Age
12WPY55_109	78.4	0.6301	6.29	0.11	0.3645	0.0065	0.77091	2016	15	2002	31	2032	12	2032	12	1.47638	Single Age
12WPY55_110	132.6	0.7492	11.46	0.08	0.4722	0.004	0.80852	2561	6.5	2493	17	2610	4.8	2610	4.8	4.48276	Single Age
12WPY55_111	198	0.994	5.726	0.06	0.3374	0.0041	0.76508	1934.7	9.1	1874	20	1987.9	9	1987.9	9	5.72966	Single Age
12WPY55_112	212	9.55	0.7923	0.0078	0.0959	0.00089	0.61512	592.9	4.3	590.3	5.2	590	10	590.3	5.2	0.438523	Single Age
12WPY55_113	51.87	0.6777	4.589	0.066	0.3117	0.004	0.7472	1747	12	1749	20	1753.3	9.1	1753.3	9.1	0.245252	Single Age
12WPY55_114	29.74	0.6817	1.672	0.027	0.1662	0.0019	0.31238	998.8	9.8	991	10	1007	18	991	10	0.780937	Single Age
12WPY55_115	156	9.64	1.016	0.018	0.1166	0.0018	0.82641	711.8	8.9	711	10	726	10	711	10	0.112391	Rim
12WPY55_115	21.77	1.397	1.735	0.053	0.17	0.005	0.55627	1025	21	1012	28	1065	34	1012	28	1.26829	Core
12WPY55_118	78.1	0.8024	1.725	0.021	0.1701	0.0021	0.85231	1017.4	7.9	1012	12	1022	12	1012	12	0.530765	Single Age
12WPY55_119	228.6	0.923	1.741	0.012	0.1713	0.0013	0.61448	1024.2	4.6	1019.3	7	1036.8	8.6	1019.3	7	0.478422	Single Age
12WPY55_120	53.86	0.587	0.854	0.018	0.1028	0.0014	0.17302	626	10	630.7	8.4	604	23	630.7	8.4	0.750799	Single Age
12WPY55_121	69	0.773	5.646	0.088	0.3432	0.0056	0.85072	1926	16	1901	27	1954	14	1954	14	2.71238	Single Age
12WPY56_1	130.2	0.719	1.919	0.02	0.1834	0.0021	0.78138	1087.4	7	1085	12	1077	12	1085	12	0.22071	Single Age
12WPY56_2	67.3	0.74	6.745	0.065	0.3793	0.0039	0.5689	2077.8	8.5	2073	18	2071.7	9.9	2071.7	9.9	0.0627504	Single Age
12WPY56_3	632	10.44	0.9258	0.0078	0.1079	0.001	0.70368	665.3	4.1	660.2	5.9	695	10	660.2	5.9	0.766571	Single Age
12WPY56_4	313	1.71	4.667	0.055	0.2981	0.0038	0.84748	1764	10	1681	19	1857.4	6.8	1857.4	6.8	9.49715	Single Age
12WPY56_5	121.9	1.31	1.281	0.021	0.1377	0.0022	0.57985	839	10	832	13	867	24	832	13	0.834327	Single Age
12WPY56_6	647	15.8	0.874	0.014	0.1023	0.0015	0.64981	637.6	7.8	627.6	8.7	675	13	627.6	8.7	1.56838	Rim
12WPY56_6	247	2.42	1.05	0.029	0.1207	0.0021	0.71208	729	14	735	12	707	33	735	12	0.823045	Core
12WPY56_7	495	2.007	1.864	0.038	0.1738	0.0029	0.92196	1071	13	1033	16	1146	11	1033	16	3.54809	Single Age
12WPY56_8	108.5	0.886	10.46	0.15	0.434	0.0068	0.81421	2478	13	2328	30	2609.6	8.7	2609.6	8.7	10.7909	Single Age
12WPY56_9	80.6	0.92	0.917	0.016	0.107	0.0018	0.49369	661.9	8.9	655	11	665	23	655	11	1.04245	Single Age
12WPY56_10	326	2.23	1.557	0.021	0.1651	0.0024	0.76308	952.8	8.2	985	13	907	12	985	13	3.37951	Single Age
12WPY56_11	244.2	2.3	0.911	0.019	0.1046	0.0024	0.7159	657	10	641	14	686	31	641	14	2.43531	Single Age
12WPY56_12	706	2.221	4.79	0.15	0.2462	0.0066	0.90914	1779	27	1424	36	2219	12	DISC	DISC	35.8269	Single Age
12WPY56_13	33.78	0.775	0.81	0.017	0.0968	0.0015	0.62293	603.1	9.5	595.5	8.8	644	21	595.5	8.8	1.26016	Single Age
12WPY56_14	203.3	0.494	0.9565	0.0084	0.11249	0.00095	0.1775	681.3	4.3	687.2	5.5	661	11	687.2	5.5	0.865991	Single Age
12WPY56_15	271	2	0.893	0.014	0.1062	0.002	0.6474	649.4	7.4	651	11	639	22	651	11	0.246381	Single Age
12WPY56_16	215	10.9	0.916	0.02	0.1083	0.0022	0.50515	660	11	663	13	667	26	663	13	0.454545	Rim
12WPY56_16	194	1.83	1.223	0.033	0.1331	0.0031	0.82139	811	15	806	18	820	16	806	18	0.616523	Core
12WPY56_17	99.8	1.114	1.17	0.015	0.1274	0.0016	0.53117	786.1	7.1	772.9	9.2	835	18	772.9	9.2	1.67918	Single Age
12WPY56_18	292.6	0.976	1.734	0.017	0.1713	0.0017	0.79841	1021	6.5	1019.1	9.3	1018.3	6.9	1019.1	9.3	0.186092	Single Age
12WPY56_19	200.6	55.8	0.9303	0.0078	0.111	0.0011	0.28783	667.7	4.1	678.6	6.1	632	13	678.6	6.1	1.63247	Single Age
12WPY56_20	293	18.8	1.286	0.028	0.1403	0.0031	0.67329	839	13	846	17	814	25	846	17	0.834327	Rim
12WPY56_20	177.7	2.39	5.53	0.086	0.2832	0.0041	0.54981	1907	14	1607	21	2255	21	2255	21	28.7361	Core
12WPY56_21	533	1.622	1.588	0.024	0.1595	0.002	0.74494	964.8	9.3	954	11	987	14	954	11	1.1194	Single Age
12WPY56_22	147.9	0.878	0.8808	0.0086	0.1044	0.0012	0.69367	641.8	4.6	639.9	7.1	647.5	8.9	639.9	7.1	0.296042	Single Age
12WPY56_23	419	3.06	1.508	0.033	0.1541	0.0035	0.82008	934	13	923	20	961	17	923	20	1.17773	Single Age
12WPY56_24	109.6	0.739	5.256	0.07	0.3192	0.0038	0.79513	1861	11	1788	19	1951.8	9.4	1951.8	9.4	8.39225	Single Age
12WPY56_25	179.9	1.006	1.802	0.018	0.1763	0.0018	0.6698	1046.5	6.7	1048.9	9.9	1048	11	1048.9	9.9	0.229336	Single Age
12WPY56_26	48.9	0.3371	5.347	0.067	0.3417	0.0043	0.74412	1878	10	1894	20	1854	10	1854	10	2.1575	Single Age
12WPY56_28	78.1	0.757	1.56	0.021	0.1521	0.002	0.55579	954.8	8.2	914	11	1062	20	914	11	4.27315	Single Age
12WPY56_29	296	2.204	2.584	0.078	0.21	0.006	0.92504	1294	22	1228	32	1401	14	1401	14	12.3483	Single Age
12WPY56_30	138	0.309	13.41	0.12	0.5403	0.0063	0.82277	2708.2	8.5	2784	26	2643.3	7.4	2643.3	7.4	5.32289	Single Age
12WPY56_31	290	1.36	5.619	0.081	0.3407	0.0049	0.83841	1918	13	1889	23	1933	17	1933	17	2.27625	Single Age
12WPY56_32	252	1.214	1.714	0.032	0.1682	0.0025	0.54552	1013	12	1002	14	1038	26	1002	14	1.08588	Single Age
12WPY56_33	195.6	1.407	1.647	0.024	0.1651	0.0022	0.69931	987.7	9.2	985	12	988	18	985	12	0.273362	Single Age
12WPY56_34	153.7	1.962	0.8598	0.0093	0.10287	0.00083	0.50367	629.8	5.1	631.2	4.9	626	13	631.2	4.9	0.222293	Single Age
12WPY56_35	399	4.66	5.559	0.065	0.3382	0.0042	0.74825	1909	10	1878	20	1949.8	6.3	1949.8	6.3	3.68243	Single Age
12WPY56_37	288	38	0.754	0.021	0.0949	0.0026	0.74452	570	12	584	15	566	33	584	15	2.45614	Single Age
12WPY56_38	139.9	1.758	4.314	0.083	0.2899	0.0045	0.81357	1695	16	1641	22	1753	14	1753	14	6.38905	Single Age
12WPY56_39	638	13.91	0.814	0.018	0.0967	0.0029	0.63797	604.5	9.9	595	17	661	14	595	17	1.57155	Rim
12WPY56_39	281	3.02	1.668	0.019	0.1647	0.0023	0.72596	996.1	7.3	983	13	1019	11	983	13	1.31513	Core
12WPY56_40	175	5.4	12.42	0.46	0.505	0.017	0.98902	2624	41	2627	78	2628	12	2628	12	0.0380518	Single Age
12WPY56_42	281	1.415	1.064	0.015	0.1214	0.0018	0.81366	735.1	7.4	738	10	723	12	738	10	0.394504	Single Age
12WPY56_43	394	1.325	0.862	0.014	0.1025	0.0016	0.93082	630.6	7.7	629.2	9.6	635.5	9.6	629.2	9.6	0.222011	Single Age
12WPY56_44	114.6	0.721	1.416	0.031	0.142	0.0031	0.79033	895	13	856	18	981	15	856	18	4.35754	Single Age
12WPY56_45	47.71	0.963	1.76	0.024	0.17	0.0019	0.51029	1030.3	8.7	1012	10	1067	11	1012	10	1.77618	Single Age
12WPY56_46	159	1.24	0.869	0.022	0.0983	0.0013	0.39956	634	12	604.1	7.8	731	41	604.1	7.8	4.71609	Single Age
12WPY56_47	201	0.834	5.494	0.084	0.3263	0.0062	0.86276	1898	13	1824	31	1980	12	1980	12	7.87879	Single Age
12WPY56_48	282.6	0.728	1.428	0.012	0.1462	0.0014	0.57713	901.4	5	879.3	8.1	950	12	879.3	8.1	2.45174	Single Age
12WPY56_49	134	0.5319	1.675	0.02	0.1655	0.0021	0.78355	998.6	7.6	987	11	1025.3	8.8	987	11	1.16163	Single Age
12WPY56_50	68.6	3.02	0.894	0.015	0.1033	0.0059	0.11613	648.2	7.9	633	35	716	81	633	35	2.34496	Rim
12WPY56_50	61.1	4.51	1.621	0.021	0.1624	0.0024	0.58725	978	8.3	970	13	989	11	970	13	0.817996	Core
12WPY56_51	174.8	5.69	0.9225	0.0082	0.1074	0.0011	0.57778	663.5	4.3	657.5	6.2	687	12	657.5	6.2	0.904295	Single Age
12WPY56_52	629	0.391	8.99	0.17	0.4003	0.0057	0.7609	2337	17	2170	26	2496	16	2496	16	13.0609	Single Age
12WPY56_53	612	57.2	0.827	0.023	0.0973	0.0029	0.75072	611	13	601	16	686	33	601	16	1.63666	Single Age
12WPY56_54	466	2.38	7.79	0.28	0.34	0.013	0.9572	2201	33	1883	61	2506	12	2506	12	24.8603	Single Age
12WPY56_56	261.1	0.945	1.645	0.015	0.1663	0.0017	0.61117	987.4	5.6	991.8	9.5	979	11	991.8	9.5	0.445615	Single Age
12WPY56_57	323.6	1.051	0.913	0.011	0.1071	0.0017	0.64816	659.3	6.2	656.1	9.6	681	19	656.1	9.6	0.485363	Single Age
12WPY56_59	363	4.79	1.516	0.016	0.154	0.0017	0.60669	936.7	6.4	923.4	9.4	965	14	923.4	9.4	1.41988	Single Age
12WPY56_60	157.1	0.761	1.772	0.022	0.1774	0.0026	0.77662	1034.8	7.8	1053	14	1008	12	1053	14	1.75879	Single Age
12WPY56_61	62.5	0.944	1.91	0.047	0.1824	0.0042	0.7724	1084	16	1080	23	1089	23	1080	23	0.369004	Single Age
12WPY56_62	156.6	1.168	1.49	0.02	0.1482	0.0016	0.40373	925.7	8.3	890.6	9.2	996	15	890.6	9.2	3.79173	Single Age
12WPY56_63	187	1.315	1.019	0.045	0.1162	0.0052	0.89234	712	23	708	30	732	33	708	30	0.561798	Rim
12WPY56_63	140.5	0.86	1.589	0.025	0.1588	0.0027	0.65095	965	10	950	15	981	21	950	15	1.5544	Core
12WPY56_64	421	1.11	1.518	0.027	0.1539	0.0032	0.93445	937	11	922	18	969	11	922	18	1.60085	Single Age
12WPY56_65	271	1.063	5.648	0.048	0.3225	0.0036	0.71623	1923	7.4	1802	18	2055.1	8.2	2055.1	8.2	12.3157	Single Age
12WPY56_66	217	1.82	1.734	0.031	0.1711	0.003	0.75664	1021	11	1018	17	1033	15	1018	17	0.29383	Single Age
12WPY56_67	149	0.889	1.562	0.014	0.1609	0.0014	0.50043	955.2	5.5	961.6	8	942	13	961.6	8	0.670017	Single Age
12WPY56_68	120.7	1.295	1.116	0.022	0.1258	0.0018	0.57773	762	10	764	10	756	18	764	10	0.262467	Single Age
12WPY56_69	275.4	1.95	0.949	0.016	0.1095	0.0018	0.73269	677.8	8.1	669	10	686	18	669	10	1.29832	Single Age
12WPY56_70	112.2	0.501	5.396	0.077	0.339	0.0053	0.63095	1884	12	1881	26	1892	15	1892	15	0.581395	Single Age
12WPY56_71	204.1	2.33	1.027	0.013	0.1194	0.0017	0.64067	716.9	6.5	726.8	9.6	675	17	726.8	9.6	1.38095	Single Age
12WPY56_72	515	0.879	0.8723	0.0078	0.1043	0.0011	0.83894	637.3	4.1	639.4	6.2	626.2	7.4	639.4	6.2	0.329515	Single Age
12WPY56_73	164.5	0.81	1.814	0.02	0.1778	0.0019	0.082886	1050	7.1	1055	10	1034	16	1055	10	0.47619	Single Age
12WPY56_74	154	0.942	2.454	0.026	0.2102	0.0021	0.73757	1258	7.7	1230	11	1302.9	9.6	1302.9	9.6	5.59521	Single Age
12WPY56_75	511	1.707	0.82	0.012	0.0975	0.0019	0.85504	607.9	6.7	599	11	641	10	599	11	1.46406	Single Age
12WPY56_78	526	2.377	1.254	0.035	0.132	0.0038	0.84431	825	16	799	22	876	40	799	22	3.15152	Rim
12WPY56_78	354	0.888	1.6	0.013	0.1621	0.0016	0.72294	969.9	4.9	968.4	8.8	972.5	7.7	968.4	8.8	0.154655	Core
12WPY56_79	844	1.88	0.727	0.014	0.0856	0.0014	0.70443	554.2	8.5	529.5	8.4	659	20	529.5	8.4	4.45687	Single Age
12WPY56_80	269	4.48	0.8997	0.0088	0.10705	0.00097	0.78642	651.4	4.7	655.5	5.6	640.8	9.1	655.5	5.6	0.629414	Single Age
12WPY56_81	41.9	0.321	1.701	0.031	0.1657	0.0027	0.4903	1008	12	988	15	1039	17	988	15	1.98413	Single Age
12WPY56_82	268.6	3.23	0.8656	0.0096	0.10217	0.00095	0.31828	633	5.2	627.1	5.6	653	13	627.1	5.6	0.93207	Single Age
12WPY56_83	17.4	0.292	0.763	0.046	0.0948	0.0034	0.11394	573	26	583	20	557	53	583	20	1.7452	Rim
12WPY56_83	45.3	0.573	1.246	0.025	0.1297	0.0022	0.63531	823	12	786	12	920	21	786	12	4.49575	Core
12WPY56_84	217	0.438	1.496	0.018	0.1505	0.0015	0.67491	928.4	7.4	903.9	8.3	988	11	903.9	8.3	2.63895	Single Age
12WPY56_85	211	0.834	4.973	0.064	0.3229	0.003	0.7224	1814	11	1803	14	1835	13	1835	13	1.74387	Single Age
12WPY56_86	354	3.141	4.76	0.1	0.3159	0.0056	0.79915	1777	18	1769	28	1769	18	1769	18	0	Single Age
12WPY56_87	163	1.028	5.307	0.044	0.3364	0.0029	0.8429	1869.6	7.1	1869	14	1871.1	6.2	1871.1	6.2	0.112233	Single Age
12WPY56_88	224.9	1.449	1.705	0.017	0.1688	0.0019	0.66361	1010.7	6.1	1007	11	1018	10	1007	11	0.366083	Single Age
12WPY56_89	9.66	1.704	0.947	0.033	0.1126	0.0028	0.22601	675	17	688	16	662	52	688	16	1.92593	Single Age
12WPY56_90	778	7.67	0.8139	0.0098	0.0942	0.0013	0.8992	604.4	5.4	580	7.5	704.8	8.7	580	7.5	4.03706	Single Age
12WPY56_91	236	1.136	0.751	0.0075	0.09246	0.00089	0.62756	568.6	4.3	570	5.3	574	11	570	5.3	0.246219	Single Age
12WPY56_92	173	1.563	9.64	0.14	0.404	0.0057	0.802	2400	13	2187	26	2579.9	8.9	2579.9	8.9	15.2293	Single Age
12WPY56_93	167.4	1.159	1.127	0.019	0.1208	0.0022	0.52364	766.1	8.8	735	12	866	21	735	12	4.05952	Rim
12WPY56_93	256.4	0.617	1.292	0.016	0.1329	0.0021	0.64893	842	6.9	805	12	963	15	805	12	4.3943	Core
12WPY56_94	580	0.364	0.7527	0.0091	0.08688	0.00098	0.77775	569.5	5.3	537	5.8	706	12	537	5.8	5.70676	Single Age
12WPY56_95	102	1.275	1.182	0.013	0.1318	0.0014	0.44275	792	6.2	798.3	8	765	14	798.3	8	0.795455	Single Age
12WPY56_97	245.1	0.889	0.8442	0.0088	0.10051	0.00097	0.54051	621.3	4.8	617.3	5.7	635	12	617.3	5.7	0.643811	Single Age
12WPY56_99	36.8	0.711	1.653	0.027	0.1656	0.0024	0.59418	990	10	988	13	979	15	988	13	0.20202	Single Age
12WPY56_100	61.1	1.869	0.737	0.013	0.0866	0.0013	0.40012	559.9	7.8	535.5	7.7	658	19	535.5	7.7	4.35792	Single Age
12WPY56_101	312	0.741	1.227	0.018	0.1324	0.002	0.70504	812.6	8.1	801	11	853	20	801	11	1.42752	Single Age
12WPY56_102	1078	6.1	0.6589	0.0047	0.08075	0.00057	0.52246	515	3.1	500.6	3.4	582	9	500.6	3.4	2.79612	Single Age
12WPY56_103	160.7	0.922	1.78	0.017	0.1748	0.002	0.60873	1037.7	6.3	1038	11	1041	12	1038	11	0.0289101	Single Age
12WPY56_104	206	0.742	1.777	0.029	0.1678	0.0017	0.50835	1036	11	1000	9.3	1123	25	1000	9.3	3.4749	Single Age
12WPY56_105	32.5	0.2467	1.595	0.025	0.1622	0.0023	0.60613	967.4	9.8	969	13	964	17	969	13	0.165392	Single Age
12WPY56_106	209.7	1.101	1.118	0.029	0.1265	0.0035	0.91873	765	15	768	20	753	12	768	20	0.392157	Single Age
12WPY56_107	315	27.9	0.825	0.012	0.1002	0.0019	0.63914	610.9	6.9	616	11	601	20	616	11	0.834834	Single Age
12WPY56_108	205	0.482	11.53	0.14	0.4629	0.0059	0.8786	2566	11	2455	27	2643.7	6.5	2643.7	6.5	7.13772	Single Age
12WPY56_109	276	3.75	1.013	0.015	0.117	0.0015	0.77086	710.2	7.7	713.3	8.4	710	18	713.3	8.4	0.436497	Single Age
12WPY56_110	143.5	1.081	2.047	0.02	0.1941	0.0023	0.68043	1130.8	6.6	1144	12	1097	10	1144	12	1.16732	Single Age
12WPY56_111	269.7	1.725	6.23	0.19	0.2534	0.0071	0.97057	2015	26	1455	37	2643	10	DISC	DISC	44.9489	Single Age
12WPY56_112	242.3	0.3184	1.583	0.026	0.1628	0.0022	0.72525	964.5	9.9	972	12	951	17	972	12	0.777605	Single Age
12WPY56_113	52.7	0.709	0.441	0.013	0.0575	0.0013	0.57716	370.3	9.1	360.3	8	459	32	360.3	8	2.70051	Single Age
12WPY56_114	80.4	1.008	1.271	0.018	0.1375	0.0019	0.42981	834.6	8.3	830	11	860	21	830	11	0.551162	Single Age
12WPY56_115	183	48.9	0.8113	0.0087	0.0997	0.0011	0.60118	603.6	4.8	612.6	6.2	567	12	612.6	6.2	1.49105	Single Age
12WPY56_116	84.2	0.986	1.31	0.016	0.1392	0.0013	0.415	851	7.1	839.9	7.4	861	15	839.9	7.4	1.30435	Single Age
12WPY56_117	182.7	0.519	6.073	0.066	0.3611	0.0037	0.63495	1986.9	9.7	1987	17	1983	10	1983	10	0.201715	Single Age
12WPY56_118	265	1.509	1.667	0.017	0.1659	0.0018	0.81641	996.6	6.5	989.5	9.9	1002	8.5	989.5	9.9	0.712422	Single Age
12WPY56_119	165.3	1.086	12.23	0.14	0.4893	0.0059	0.87435	2621	11	2570	26	2653.8	5.6	2653.8	5.6	3.15774	Single Age
12WPY56_120	201.6	1.065	0.8176	0.0091	0.09902	0.00093	0.45689	606.4	5.1	608.6	5.4	604	14	608.6	5.4	0.362797	Single Age
12WPY56_121	321	0.82	11.65	0.16	0.4781	0.0055	0.88689	2575	13	2518	24	2620.1	7.4	2620.1	7.4	3.8968	Single Age
12WPY56_122	187	0.775	0.812	0.012	0.0986	0.002	0.67999	603.3	6.9	606	12	593	16	606	12	0.447539	Single Age
12WPY56_123	48.6	1.39	1.794	0.03	0.1733	0.0025	0.73405	1044	11	1030	14	1070	21	1030	14	1.341	Single Age
12WPY56_124	339	0.447	0.838	0.015	0.0989	0.0019	0.90843	617.5	8.3	608	11	655.6	9.3	608	11	1.53846	Single Age

## Sheet: U-Pb Devonian
Devonian unit zircon U-Pb data
Sample_Grain #	[U] ppm	U/Th	207/235	2σ error	206/238	2σ error	RHO	207/235 Age (Ma)	2σ error	206/238 Age (Ma)	2σ error	207/206 Age (Ma)	2σ error	Best age (Ma)	2σ error	% Discordance*	Rim/Core
12WPY06_1	28.1	1.98	0.93	0.014	0.1097	0.0013	0.28222	667.1	7.5	670.8	7.7	641	34	670.8	7.7	0.554639	Single Age
12WPY06_2	237	0.553	5.303	0.054	0.3349	0.0035	0.81787	1868.7	8.7	1862	17	1880	10	1880	10	0.957447	Single Age
12WPY06_3	77.1	0.983	1.419	0.026	0.1498	0.0014	0.30172	896	11	899.9	7.9	884	35	899.9	7.9	0.435268	Single Age
12WPY06_4	264	2.284	4.34	0.25	0.2231	0.0091	0.9811	1679	47	1295	47	2208	33	DISC	DISC	41.3496	Single Age
12WPY06_5	476	9.9	1.169	0.028	0.1162	0.0023	0.94126	784	13	708	13	983	20	708	13	9.69388	Single Age
12WPY06_6	10.1	0.064	9	1.6	0.192	0.023	0.94669	2130	160	1090	110	3540	150	DISC	DISC	48.8263	Single Age
12WPY06_7	768	4.095	0.7082	0.0071	0.08526	0.00084	0.80727	543.5	4.2	527.4	5	606	14	527.4	5	2.96228	Single Age
12WPY06_8	189.6	0.907	0.802	0.01	0.09581	0.00081	0.42757	598.6	5.7	589.8	4.8	624	25	589.8	4.8	1.4701	Single Age
12WPY06_9	250	1.139	0.809	0.023	0.096	0.003	0.96563	600	13	591	18	643	23	591	18	1.5	Single Age
12WPY06_10	164	3.11	8.76	0.41	0.375	0.014	0.96861	2317	41	2046	68	2540	27	2540	27	19.4488	Single Age
12WPY06_11	215.6	0.694	9.85	0.36	0.423	0.013	0.98119	2418	34	2268	59	2558	13	2558	13	11.337	Single Age
12WPY06_12	1187	35.9	0.814	0.024	0.0969	0.0031	0.76251	604	14	596	18	642	27	596	18	1.3245	Rim
12WPY06_12	143	1.74	1.297	0.024	0.1424	0.0024	0.76077	844	11	858	14	809	37	858	14	1.65877	Core
12WPY06_13	358	1.109	13.37	0.18	0.5377	0.0055	0.80922	2706	13	2776	24	2662	12	2662	12	4.28249	Single Age
12WPY06_14	29.84	0.856	1.524	0.023	0.1564	0.0023	0.70737	940.3	9.2	938	13	955	24	938	13	0.244603	Single Age
12WPY06_15	378	3.36	1.17	0.043	0.1311	0.0041	0.96205	785	20	793	23	743	20	793	23	1.01911	Single Age
12WPY06_16	1560	19	0.676	0.017	0.0796	0.0029	0.74664	524	10	494	17	670	54	494	17	5.72519	Rim
12WPY06_16	164.1	2.55	1.184	0.019	0.127	0.0022	0.63926	792.9	8.9	771	13	860	23	771	13	2.76201	Core
12WPY06_17	206	0.93	0.7772	0.0097	0.092	0.0011	0.72455	583.6	5.6	567.4	6.7	629	21	567.4	6.7	2.77587	Single Age
12WPY06_18	402	1.482	0.8169	0.0097	0.0977	0.0013	0.80591	606	5.4	600.5	7.4	637	17	600.5	7.4	0.907591	Single Age
12WPY06_19	509	52	0.744	0.017	0.0879	0.0019	0.65949	564.3	9.9	543	11	647	38	543	11	3.77459	Rim
12WPY06_19	174	1.308	2.957	0.053	0.2109	0.0036	0.83449	1399	15	1234	19	1653	22	1653	22	25.3479	Core
12WPY06_20	97.6	1.198	9.68	0.38	0.41	0.015	0.98559	2395	41	2211	70	2567	18	2567	18	13.8683	Single Age
12WPY06_21	207	0.477	6.624	0.077	0.3826	0.0041	0.82504	2062	10	2088	19	2038	12	2038	12	2.45339	Single Age
12WPY06_22	395	0.683	1.381	0.03	0.1411	0.0026	0.85589	879	13	851	15	970	21	851	15	3.18544	Single Age
12WPY06_23	66.1	2.9	1.556	0.075	0.1431	0.0033	0.71084	952	29	862	19	1190	99	862	19	9.45378	Rim
12WPY06_23	194.6	0.5609	5.822	0.066	0.344	0.005	0.81145	1949	9.9	1905	24	1995	19	1995	19	4.51128	Core
12WPY06_24	1088	12.23	0.7695	0.0081	0.09	0.001	0.69496	579.9	4.8	555.8	5.9	676	17	555.8	5.9	4.15589	Single Age
12WPY06_25	1371	1.89	1.94	0.13	0.126	0.0031	0.64184	1090	46	765	18	1800	110	DISC	DISC	29.8165	Rim
12WPY06_25	722	0.827	8.47	0.15	0.4239	0.0085	0.88628	2281	17	2277	39	2286	16	2286	16	0.393701	Core
12WPY06_26	492	2.6	0.938	0.019	0.1101	0.0024	0.81286	675	11	673	14	702	32	673	14	0.296296	Single Age
12WPY06_27	1200	11.4	0.789	0.033	0.0904	0.0024	0.92025	590	19	558	14	730	42	558	14	5.42373	Rim
12WPY06_27	180.9	1.04	1.501	0.02	0.1569	0.0024	0.82366	930.4	8.1	939	14	904	19	939	14	0.924334	Core
12WPY06_28	308	17.8	0.86	0.026	0.1034	0.0022	0.67504	630	14	634	13	622	49	634	13	0.634921	Rim
12WPY06_28	266	1.13	1.127	0.012	0.1262	0.0014	0.66854	766.2	5.5	765.9	8.2	774	18	765.9	8.2	0.0391543	Core
12WPY06_29	29.7	0.88	5.89	0.32	0.354	0.014	0.93824	1936	50	1956	67	1931	37	1931	37	1.29467	Single Age
12WPY06_30	345.3	1.816	11.36	0.11	0.4632	0.0042	0.84619	2552.2	8.7	2453	18	2633.7	8.4	2633.7	8.4	6.86107	Single Age
12WPY06_31	345	1.355	10.35	0.16	0.4331	0.0066	0.91194	2465	15	2323	29	2584	12	2584	12	10.1006	Single Age
12WPY06_32	109.8	1.9	2.681	0.083	0.2095	0.0058	0.79438	1320	23	1225	31	1494	34	1494	34	18.0054	Single Age
12WPY06_33	225	0.75	0.899	0.033	0.1004	0.0014	0.80619	649	16	616.6	7.9	738	42	616.6	7.9	4.9923	Single Age
12WPY06_34	263	1.51	0.745	0.011	0.092	0.0014	0.76786	564.7	6.1	567.1	8	562	21	567.1	8	0.425004	Single Age
12WPY06_35	272	3.342	1.213	0.015	0.1336	0.0018	0.80501	806.1	6.9	808	10	810	16	808	10	0.235703	Single Age
12WPY06_36	54.8	1.441	1.231	0.025	0.1306	0.0022	0.61156	815	12	795	13	859	34	795	13	2.45399	Single Age
12WPY06_37	258.4	2.55	1.851	0.015	0.1819	0.0017	0.72561	1063.4	5.5	1077.4	9.1	1035	14	1077.4	9.1	1.31653	Single Age
12WPY06_38	409	142	1.088	0.033	0.122	0.0034	0.57273	747	16	742	20	783	38	742	20	0.669344	Rim
12WPY06_38	125.8	0.585	1.83	0.034	0.1837	0.0031	0.8486	1057	13	1089	16	990	22	1089	16	3.02744	Core
12WPY06_39	152.6	1.196	6.13	0.33	0.285	0.012	0.9827	1975	46	1617	61	2395	24	DISC	DISC	32.4843	Single Age
12WPY06_40	205.2	1.52	4.96	0.2	0.2378	0.007	0.94096	1806	35	1374	36	2365	27	DISC	DISC	41.9027	Single Age
12WPY06_41	144	2.7	1.593	0.018	0.1608	0.0019	0.70281	968.2	6.9	961	10	992	20	961	10	0.743648	Single Age
12WPY06_42	169.4	0.85	5.645	0.059	0.3413	0.0045	0.70765	1922.6	9.1	1892	22	1963	16	1963	16	3.61691	Single Age
12WPY06_43	73.3	1.087	1.254	0.018	0.1366	0.0017	0.45173	826.2	7.8	825.2	9.9	799	32	825.2	9.9	0.121036	Single Age
12WPY06_44	512	2.66	2.26	0.12	0.1922	0.0071	0.31731	1198	36	1133	38	1288	97	1133	38	5.42571	Rim
12WPY06_44	294.8	0.858	2.995	0.028	0.2501	0.0028	0.75697	1407.1	7.6	1439	15	1367	16	1367	16	5.26701	Core
12WPY06_45	233.8	1.282	1.0283	0.0096	0.1199	0.0012	0.47725	717.9	4.8	730.9	6.7	691	20	730.9	6.7	1.81084	Single Age
12WPY06_46	156.6	1.442	11.76	0.11	0.482	0.0047	0.8499	2585.1	8.6	2535	21	2624	10	2624	10	3.39177	Single Age
12WPY06_47	165.5	0.817	9.16	0.16	0.4178	0.005	0.77011	2355	15	2250	23	2435	17	2435	17	7.59754	Single Age
12WPY06_48	214	1.357	6.46	0.13	0.3397	0.0058	0.79554	2043	17	1885	28	2213	22	2213	22	14.8215	Single Age
12WPY06_49	390	0.399	1.505	0.092	0.1255	0.0019	0.32024	921	35	762	11	1310	100	DISC	DISC	17.2638	Single Age
12WPY06_50	303	1.181	11.43	0.21	0.4589	0.0086	0.91409	2556	18	2433	38	2657	13	2657	13	8.43056	Single Age
12WPY06_51	263	2.923	1.128	0.015	0.125	0.0019	0.85979	766.4	7	759	11	792	21	759	11	0.965553	Single Age
12WPY06_52	342	2.17	1.046	0.032	0.1173	0.0042	0.9013	726	16	714	24	739	32	714	24	1.65289	Single Age
12WPY06_53	23.7	0.251	0.926	0.021	0.1098	0.0017	0.049406	665	11	671	10	630	45	671	10	0.902256	Single Age
12WPY06_54	1271	14.9	0.662	0.013	0.081	0.0017	0.82521	515.3	8	502	10	577	23	502	10	2.58102	Single Age
12WPY06_55	274.4	0.985	1.04	0.026	0.1148	0.0013	0.49077	722	12	700.6	7.5	779	38	700.6	7.5	2.96399	Single Age
12WPY06_56	308	8.41	0.887	0.03	0.1029	0.0027	0.8302	644	16	631	16	691	44	631	16	2.01863	Rim
12WPY06_56	59.7	1.347	1.773	0.039	0.1564	0.0035	0.48589	1035	14	937	20	1260	50	937	20	9.4686	Core
12WPY06_57	606	6.3	1.18	0.17	0.1053	0.0057	0.92611	785	79	645	33	1180	190	DISC	DISC	17.8344	Rim
12WPY06_57	323.1	0.944	5.249	0.077	0.2526	0.0034	0.87954	1860	13	1451	18	2359	14	DISC	DISC	38.4909	Core
12WPY06_58	173.9	1.866	3.037	0.028	0.2432	0.0024	0.63718	1416.5	6.9	1403	12	1433	15	1433	15	2.09351	Single Age
12WPY06_59	308	11.95	1.081	0.067	0.1044	0.005	0.96866	754	38	640	29	1106	63	DISC	DISC	15.1194	Rim
12WPY06_59	391.4	3.01	3.691	0.056	0.2316	0.004	0.84762	1573	11	1342	21	1869	18	1869	18	28.1969	Core
12WPY06_60	243.4	0.454	4.908	0.074	0.3039	0.004	0.89135	1802	13	1710	20	1907	12	1907	12	10.3304	Single Age
12WPY06_62	197	0.84	6.3	0.093	0.38	0.0052	0.89323	2018	13	2076	24	1947	19	1947	19	6.62558	Single Age
12WPY06_63	313	3	0.87	0.036	0.1044	0.0041	0.92883	634	20	640	24	615	37	640	24	0.946372	Single Age
12WPY06_64	305	6.15	0.961	0.012	0.1114	0.0015	0.49859	683.2	6.3	680.8	8.7	686	17	680.8	8.7	0.351288	Single Age
12WPY06_65	87.5	0.667	4.507	0.043	0.2853	0.003	0.73312	1732.9	8.1	1617	15	1854	14	1854	14	12.7832	Single Age
12WPY06_66	799	1.42	1.265	0.018	0.1255	0.0017	0.7983	829.6	8.1	762.2	9.8	982	18	762.2	9.8	8.1244	Single Age
12WPY06_67	1056	3.01	1.201	0.073	0.1034	0.0036	0.97587	791	32	637	22	1264	49	DISC	DISC	19.469	Single Age
12WPY06_68	60.8	0.3942	1.721	0.022	0.1687	0.0021	0.46001	1015.7	8	1005	11	1026	27	1005	11	1.05346	Single Age
12WPY06_69	261	0.911	3.88	0.12	0.2597	0.0074	0.96694	1604	26	1487	38	1757	17	1757	17	15.3671	Single Age
12WPY06_70	222	0.932	1.532	0.028	0.1546	0.0029	0.84531	943	11	926	16	963	18	926	16	1.80276	Single Age
12WPY06_71	178	1.937	1.101	0.011	0.1252	0.0015	0.71025	753.7	5.5	760.3	8.8	727	16	760.3	8.8	0.87568	Single Age
12WPY06_72	156	0.329	5.414	0.063	0.3412	0.0043	0.81159	1886	10	1892	21	1873	13	1873	13	1.01442	Single Age
12WPY06_73	126	0.812	1.607	0.026	0.1624	0.0034	0.7403	972	10	970	19	991	29	970	19	0.205761	Single Age
12WPY06_74	183.8	0.507	6.134	0.073	0.3554	0.0054	0.76456	1994	10	1959	26	2025	18	2025	18	3.25926	Single Age
12WPY06_75	1085	7.11	0.6099	0.0071	0.0715	0.0011	0.69674	483.3	4.5	445.1	6.7	660	26	445.1	6.7	7.90399	Single Age
12WPY06_76	659	2.52	0.826	0.02	0.0964	0.0023	0.94224	610	11	593	13	666	15	593	13	2.78689	Single Age
12WPY06_77	31.5	1.31	0.91	0.033	0.1089	0.0027	0.3841	659	17	666	16	649	71	666	16	1.06222	Rim
12WPY06_77	176	1.908	1.554	0.03	0.155	0.0028	0.59833	952	12	929	16	999	28	929	16	2.41597	Core
12WPY06_78	281	3.87	1.046	0.017	0.1163	0.0018	0.88943	726	8.6	709	11	778	20	709	11	2.3416	Single Age
12WPY06_79	201	2.02	4.67	0.14	0.2878	0.0085	0.93703	1755	25	1628	42	1912	15	1912	15	14.8536	Single Age
12WPY06_80	591	1.27	0.6201	0.0061	0.07489	0.00095	0.79386	489.8	3.8	465.5	5.7	588	16	465.5	5.7	4.96121	Single Age
12WPY06_81	450	6.45	0.769	0.016	0.0912	0.002	0.91507	578.4	9.1	562	12	641	18	562	12	2.83541	Single Age
12WPY06_82	95.1	1.215	0.5438	0.0077	0.0708	0.00088	0.57771	440.7	5.1	441.6	5.2	437	27	441.6	5.2	0.204221	Single Age
12WPY06_83	183	1.078	7.24	0.14	0.3162	0.0039	0.84592	2139	17	1771	19	2507	17	2507	17	29.3578	Single Age
12WPY06_84	295	1.064	12.32	0.15	0.5049	0.0069	0.78233	2631	11	2633	30	2623	17	2623	17	0.381243	Single Age
12WPY06_85	124	1.33	0.919	0.013	0.1089	0.0018	0.62723	661.4	6.9	666	11	639	31	666	11	0.695494	Single Age
12WPY06_86	47.1	0.793	2.173	0.096	0.1892	0.0036	0.86602	1166	30	1117	20	1262	58	1117	20	4.2024	Single Age
12WPY06_87	266	5.5	6.83	0.18	0.3795	0.0083	0.88414	2094	23	2077	38	2103	20	2103	20	1.23633	Single Age
12WPY06_88	79.8	1.14	3.4	0.1	0.2349	0.0058	0.94368	1505	23	1359	30	1714	21	1714	21	20.7118	Single Age
12WPY06_89	198	1.687	1.056	0.012	0.1219	0.0016	0.67516	732.1	5.9	741.5	9	704	20	741.5	9	1.28398	Single Age
12WPY06_90	1101	3.04	1.607	0.031	0.1219	0.0021	0.84186	972	12	741	12	1522	18	DISC	DISC	23.7654	Single Age
12WPY06_91	211	0.745	1.769	0.029	0.1747	0.003	0.92391	1035	11	1037	16	1031	12	1037	16	0.193237	Single Age
12WPY06_92	113.4	0.765	1.026	0.041	0.1073	0.0016	0.65867	713	20	657.9	9.1	885	66	657.9	9.1	7.72791	Single Age
12WPY06_93	166.5	0.691	11.8	0.12	0.4918	0.0056	0.77711	2587.5	9.4	2578	24	2591	12	2591	12	0.501737	Single Age
12WPY06_94	458	5.69	0.991	0.022	0.1116	0.0021	0.52491	699	11	682	12	742	45	682	12	2.43205	Rim
12WPY06_94	198	3.38	1.627	0.03	0.1661	0.0022	0.46779	980	12	991	12	949	33	991	12	1.12245	Core
12WPY06_95	242	1.545	1.701	0.026	0.169	0.0022	0.74202	1008	9.7	1006	12	1012	22	1006	12	0.198413	Single Age
12WPY06_96	1953	30	1.381	0.04	0.145	0.0038	0.32516	880	17	873	22	947	66	873	22	0.795455	Rim
12WPY06_96	401	2.65	7.8	0.2	0.387	0.01	0.86057	2207	22	2108	48	2306	20	2306	20	8.5863	Core
12WPY06_97	286.9	0.643	1.872	0.02	0.1811	0.002	0.6972	1070.9	7	1073	11	1058	18	1073	11	0.196097	Single Age
12WPY06_98	217	0.576	1.587	0.021	0.1567	0.0022	0.47645	964.6	8.3	938	12	1018	27	938	12	2.75762	Single Age
12WPY06_99	162	1.83	12.37	0.1	0.5053	0.0045	0.80015	2632.2	7.8	2636	19	2632.7	9.4	2632.7	9.4	0.125347	Single Age
12WPY06_100	45.4	1.036	11.64	0.13	0.4618	0.006	0.79647	2575	11	2446	26	2678	12	2678	12	8.66318	Single Age
12WPY06_101	171	0.904	0.9948	0.0095	0.1158	0.0012	0.62767	701.6	4.7	706.3	7.1	684	19	706.3	7.1	0.669897	Single Age
12WPY06_102	1240	40.7	0.654	0.015	0.0807	0.0018	0.74166	510.7	9.2	500	11	532	42	500	11	2.09516	Single Age
12WPY06_103	144.1	0.416	12.461	0.094	0.5041	0.0053	0.76011	2639.3	7.1	2631	23	2648	12	2648	12	0.641994	Single Age
12WPY06_104	55.1	1.031	1.652	0.018	0.1683	0.0017	0.46433	990.1	6.8	1002.4	9.5	950	22	1002.4	9.5	1.2423	Single Age
12WPY06_105	219	10.2	0.834	0.036	0.1044	0.0043	0.79592	615	20	640	25	531	58	640	25	4.06504	Rim
12WPY06_105	9.64	0.162	1.36	0.035	0.1474	0.0035	0.42732	870	15	886	19	838	59	886	19	1.83908	Core
12WPY06_106	260	13	1.2	0.18	0.1191	0.0074	0.89269	808	82	725	43	1010	180	DISC	DISC	10.2723	Rim
12WPY06_106	269.6	2.18	9.28	0.34	0.399	0.012	0.92632	2361	34	2163	57	2531	21	2531	21	14.5397	Core
12WPY06_107	123.8	0.742	10.07	0.13	0.4273	0.0058	0.59429	2440	12	2296	26	2571	19	2571	19	10.6962	Single Age
12WPY06_108	1280	4.81	0.6764	0.005	0.08067	0.00075	0.6864	524.5	3	500.1	4.5	649	14	500.1	4.5	4.65205	Single Age
12WPY06_109	71.1	0.3452	5.019	0.054	0.3225	0.0041	0.71895	1822	9.1	1801	20	1848	15	1848	15	2.54329	Single Age
12WPY06_110	864	0.795	1.132	0.048	0.1074	0.0018	0.32171	765	22	658	10	1044	63	DISC	DISC	13.9869	Single Age
12WPY06_111	266	1.94	0.997	0.05	0.1019	0.0027	0.7451	701	26	625	16	958	77	DISC	DISC	10.8417	Single Age
12WPY06_112	772	2.18	0.717	0.0069	0.08523	0.00096	0.78431	548.7	4.1	527.2	5.7	631	16	527.2	5.7	3.91835	Single Age
12WPY06_113	23.82	1.451	1.448	0.023	0.1499	0.0022	0.51652	909.6	9.7	900	12	911	33	900	12	1.05541	Single Age
12WPY06_114	678	1.53	0.851	0.022	0.0945	0.0016	0.43431	624	12	582.1	9.3	793	35	582.1	9.3	6.71474	Single Age
12WPY06_115	102	1.071	1.092	0.024	0.1237	0.0028	0.71498	748	12	751	16	753	31	751	16	0.40107	Single Age
12WPY06_116	58.7	2.44	0.819	0.013	0.0981	0.0013	0.14971	607.1	7.2	603	7.9	622	34	603	7.9	0.675342	Single Age
12WPY06_117	120.2	1.536	1.098	0.037	0.1234	0.0015	0.44153	745	12	750	8.8	732	41	750	8.8	0.671141	Single Age
12WPY06_118	245	2.59	2.547	0.076	0.2213	0.0059	0.95117	1281	22	1287	31	1268	15	1268	15	1.49842	Single Age
12WPY06_119	1298	1	7.38	0.2	0.3115	0.0078	0.49214	2164	26	1756	38	2549	33	DISC	DISC	31.1102	Single Age
12WPY06_120	820	1.79	5.01	0.14	0.2902	0.0085	0.93322	1819	25	1640	42	2040	18	2040	18	19.6078	Single Age
12WPY06_121	265	5.72	1.781	0.018	0.1723	0.0019	0.8286	1038.3	6.5	1024	11	1068	16	1024	11	1.37725	Single Age
12WPY06_122	50.2	0.441	1.552	0.026	0.1598	0.003	0.78038	950	10	955	17	931	26	955	17	0.526316	Single Age
12WPY06_123	176	2.3	0.93	0.02	0.1102	0.0021	0.65466	668	10	674	12	650	25	674	12	0.898204	Single Age
12WPY06_124	128	12.5	1.345	0.092	0.1148	0.0028	0.30457	859	39	700	16	1290	130	DISC	DISC	18.5099	Rim
12WPY06_124	258.8	0.553	1.68	0.03	0.157	0.0033	0.78121	1000	11	944	17	1079	31	944	17	5.6	Core
12WPY38_1	122	0.946	1.943	0.027	0.1901	0.0023	0.77559	1095.4	9.3	1122	12	1034	11	1122	12	2.42834	Single Age
12WPY38_2	71	0.75	1.518	0.043	0.1513	0.0039	0.86508	935	18	907	22	1012	14	907	22	2.99465	Single Age
12WPY38_3	44.7	0.291	12.3	0.17	0.5031	0.0057	0.89298	2628	13	2626	24	2618.3	4.6	2618.3	4.6	0.294084	Single Age
12WPY38_4	67.5	1.572	13.36	0.13	0.5267	0.0043	0.78093	2704.6	8.9	2727	18	2691.3	5.6	2691.3	5.6	1.3265	Single Age
12WPY38_5	455	1.38	8.651	0.061	0.427	0.0041	0.54608	2301.7	6.5	2294	19	2296	11	2296	11	0.087108	Single Age
12WPY38_6	40.4	0.925	1.702	0.036	0.168	0.0028	0.8751	1008	14	1001	16	1014	12	1001	16	0.694444	Single Age
12WPY38_7	55.4	1.191	0.993	0.014	0.1169	0.0014	0.58087	700	7.2	712.4	7.8	659	14	712.4	7.8	1.77143	Single Age
12WPY38_8	381.2	12.56	0.901	0.011	0.1096	0.0018	0.87922	652.7	6	670	10	597.7	7.5	670	10	2.65053	Single Age
12WPY38_9	797	1.403	12.95	0.14	0.4717	0.0048	0.74494	2675	10	2491	21	2794.2	8.8	2794.2	8.8	10.851	Single Age
12WPY38_10	353	3.77	0.969	0.011	0.1126	0.0014	0.77159	687.8	5.6	687.9	8.3	662.4	9.5	687.9	8.3	0.0145391	Single Age
12WPY38_11	178	2.74	6.281	0.069	0.3695	0.003	0.74853	2016.2	9.4	2027	14	1997.4	6.1	1997.4	6.1	1.48193	Single Age
12WPY38_12	106.6	1.458	1.699	0.021	0.1705	0.0017	0.66946	1007.5	7.8	1014.8	9.4	982	11	1014.8	9.4	0.724566	Single Age
12WPY38_13	155.2	0.605	1.722	0.019	0.1693	0.002	0.72123	1017.1	7.1	1008	11	1015.7	9.1	1008	11	0.894701	Single Age
12WPY38_14	84.7	0.493	11.589	0.094	0.4837	0.0033	0.44705	2571.3	7.6	2545	15	2587	5.5	2587	5.5	1.6235	Single Age
12WPY38_15	126	1.584	1.502	0.028	0.1476	0.0021	0.38894	932	11	887	12	1010	32	887	12	4.82833	Single Age
12WPY38_16	236.9	0.762	12.703	0.097	0.5113	0.0038	0.71847	2658.3	7.4	2662	16	2643.2	4.1	2643.2	4.1	0.711259	Single Age
12WPY38_17	192.4	0.614	11.97	0.16	0.4788	0.007	0.69088	2601	13	2525	31	2637	11	2637	11	4.24725	Single Age
12WPY38_18	376	2.906	0.919	0.01	0.1094	0.0015	0.77893	661.8	5.4	669	8.8	627	11	669	8.8	1.08794	Single Age
12WPY38_19	216.7	3.33	0.8095	0.0094	0.09835	0.00082	0.62421	602.6	5.3	604.7	4.8	583	11	604.7	4.8	0.34849	Single Age
12WPY38_20	566	3.656	1.0248	0.0071	0.1193	0.0011	0.59892	716.2	3.6	726.7	6.2	660.3	7.2	726.7	6.2	1.46607	Single Age
12WPY38_21	280	0.7	1.591	0.02	0.1604	0.0016	0.80481	966.3	7.9	958.8	8.9	955.8	9.4	958.8	8.9	0.776156	Single Age
12WPY38_22	112.3	0.787	0.849	0.01	0.1006	0.0013	0.44473	623.8	5.5	617.6	7.4	651	12	617.6	7.4	0.993908	Single Age
12WPY38_23	276	1.137	10.25	0.16	0.4241	0.005	0.8344	2456	15	2279	23	2595.2	7	2595.2	7	12.184	Single Age
12WPY38_24	690	14.8	1.035	0.017	0.1199	0.002	0.93533	721.6	8.1	730	11	681	10	730	11	1.16408	Single Age
12WPY38_25	134	1.396	1.844	0.015	0.1813	0.0016	0.58498	1060.9	5.5	1074.1	8.5	1033.8	7.9	1074.1	8.5	1.24423	Single Age
12WPY38_26	373	1.425	1.573	0.02	0.1592	0.0018	0.78068	960	7.9	952.3	9.8	965	10	952.3	9.8	0.802083	Single Age
12WPY38_27	468	7.5	0.988	0.011	0.1177	0.0013	0.74953	697.3	5.7	717	7.7	647.1	8.5	717	7.7	2.82518	Single Age
12WPY38_28	374	1.54	0.8303	0.0063	0.1006	0.001	0.61679	613.7	3.5	617.8	5.9	579.4	9.9	617.8	5.9	0.668079	Single Age
12WPY38_29	305	2.921	1.2776	0.0085	0.14179	0.00094	0.24836	835.7	3.8	854.7	5.3	794.1	7.3	854.7	5.3	2.27354	Single Age
12WPY38_30	1135	6.15	1.034	0.011	0.12178	0.00098	0.74211	721.4	5.6	740.7	5.6	667.7	5.6	740.7	5.6	2.67535	Single Age
12WPY38_31	49.9	2.224	1.13	0.02	0.1251	0.0017	0.78039	767	9.7	760	10	783	16	760	10	0.912647	Single Age
12WPY38_32	70.6	0.987	4.77	0.058	0.3142	0.0034	0.69198	1779	10	1761	17	1777	10	1777	10	0.900394	Single Age
12WPY38_33	131.2	0.6764	1.474	0.016	0.15	0.0012	0.47003	919.6	6.4	901.1	6.7	948	11	901.1	6.7	2.01174	Single Age
12WPY38_34	312.5	2.09	12.41	0.19	0.4819	0.0056	0.84039	2634	14	2535	24	2698.7	6.5	2698.7	6.5	6.06588	Single Age
12WPY38_35	126	0.666	3.98	0.14	0.259	0.008	0.94923	1629	28	1482	41	1822	11	1822	11	18.6608	Single Age
12WPY38_36	148	2.132	0.8919	0.0095	0.107	0.0012	0.65188	647.2	5.1	655.1	6.9	630.4	9.6	655.1	6.9	1.22064	Single Age
12WPY38_37	224	1.31	1.702	0.025	0.1684	0.0018	0.80354	1008.4	9.5	1003	10	1012.7	8.1	1003	10	0.535502	Single Age
12WPY38_38	245	1.383	1.01	0.019	0.1146	0.0011	0.5897	707.8	9.7	699.6	6.5	739	19	699.6	6.5	1.15852	Single Age
12WPY38_39	180	1.431	1.411	0.015	0.152	0.0016	0.06177	893.1	6.3	911.9	8.8	828	10	911.9	8.8	2.10503	Single Age
12WPY38_40	43.34	0.359	1.214	0.017	0.1356	0.0015	0.6796	806.6	7.9	819.8	8.4	775	14	819.8	8.4	1.6365	Single Age
12WPY38_41	150.2	0.618	1.191	0.021	0.1293	0.0019	0.65677	795.8	9.9	784	11	801	16	784	11	1.48278	Single Age
12WPY38_42	234	3.764	0.836	0.01	0.09897	0.00095	0.64254	616.8	5.5	608.3	5.6	642	11	608.3	5.6	1.37808	Single Age
12WPY38_43	335	5.2	1.21	0.088	0.1302	0.0064	0.96695	790	40	787	36	786	44	787	36	0.379747	Single Age
12WPY38_44	27.1	1.068	1.428	0.026	0.138	0.0018	0.24494	900	11	834	10	1051	23	834	10	7.33333	Single Age
12WPY38_45	108.9	1.471	10.43	0.22	0.4497	0.0079	0.95125	2472	20	2393	35	2505	10	2505	10	4.47106	Single Age
12WPY38_46	139	0.853	1.493	0.035	0.1532	0.0025	0.87836	927	14	918	14	940	13	918	14	0.970874	Single Age
12WPY38_47	191.3	1.865	1.1829	0.0086	0.1295	0.0012	0.48957	792.5	4	784.9	6.6	808.3	8.9	784.9	6.6	0.958991	Single Age
12WPY38_48	334.8	1.988	4.143	0.09	0.2658	0.0065	0.95308	1660	18	1518	33	1832.1	9.4	1832.1	9.4	17.1443	Single Age
12WPY38_49	133.9	1.09	6.297	0.057	0.362	0.003	0.61656	2017.6	7.9	1991	14	2027	6.9	2027	6.9	1.77602	Single Age
12WPY38_50	140.2	1.361	10.31	0.16	0.4574	0.0043	0.7855	2461	14	2428	19	2485	8	2485	8	2.29376	Single Age
12WPY38_51	80	2.28	1.4	0.016	0.1424	0.002	0.40634	888.6	6.7	858	11	967	19	858	11	3.44362	Single Age
12WPY38_52	61.8	1.21	0.849	0.015	0.1002	0.0013	0.65409	623.6	8.1	615.6	7.8	665	15	615.6	7.8	1.28287	Single Age
12WPY38_53	155.3	0.984	0.965	0.03	0.1002	0.0035	0.95091	687	16	615	20	943	10	DISC	DISC	10.4803	Single Age
12WPY38_54	297	4.35	0.942	0.011	0.111	0.0012	0.6932	673.9	5.6	678.5	7	648.7	9	678.5	7	0.682594	Single Age
12WPY38_55	460	1.096	1.118	0.01	0.1278	0.0018	0.6202	761.9	4.8	775	10	715	13	775	10	1.71939	Single Age
12WPY38_56	1065	7.6	3.88	0.15	0.2194	0.0051	0.93933	1603	31	1278	27	2045	31	DISC	DISC	37.5061	Single Age
12WPY38_57	120.3	0.55	5.738	0.08	0.3374	0.0033	0.66324	1936	12	1874	16	1988	18	1988	18	5.73441	Single Age
12WPY38_58	195.6	0.899	4.826	0.046	0.3178	0.0027	0.67347	1788.9	8	1778	13	1799.5	5.8	1799.5	5.8	1.19478	Single Age
12WPY38_59	283.8	1.786	0.9446	0.0083	0.1114	0.001	0.47886	676.3	4.4	680.8	6	661	10	680.8	6	0.665385	Single Age
12WPY38_60	51.8	0.568	1.828	0.019	0.1773	0.0016	0.37727	1055.1	7	1052.3	8.8	1039	11	1052.3	8.8	0.265378	Single Age
12WPY38_61	112.3	0.5672	1.156	0.013	0.1296	0.0012	0.6025	779.7	6.2	785.3	6.7	755.8	9.6	785.3	6.7	0.718225	Single Age
12WPY38_62	63.4	0.3355	1.739	0.021	0.1722	0.0015	0.39413	1022.7	7.8	1024.4	8.4	998	14	1024.4	8.4	0.166227	Single Age
12WPY38_63	307	2.751	0.9449	0.0087	0.11166	0.00093	0.5196	675.2	4.6	682.3	5.4	651.2	9	682.3	5.4	1.05154	Single Age
12WPY38_64	249	3.54	1.062	0.011	0.1217	0.0015	0.79449	734.6	5.3	740.4	8.5	698.8	6.8	740.4	8.5	0.789545	Single Age
12WPY38_65	410	69	0.927	0.014	0.1108	0.0016	0.4815	665.8	7.2	677.1	9.2	650	23	677.1	9.2	1.69721	Single Age
12WPY38_66	105.5	0.468	5.664	0.052	0.3564	0.0035	0.75089	1925.4	7.9	1965	17	1882.5	5.6	1882.5	5.6	4.38247	Single Age
12WPY38_67	173.1	1.132	1.418	0.019	0.1463	0.0022	0.81994	896	7.9	882	13	942.6	9.2	882	13	1.5625	Single Age
12WPY38_68	277	3.24	1.598	0.012	0.1629	0.0013	0.5768	969.4	4.8	972.6	7.3	950.4	6.8	972.6	7.3	0.330101	Single Age
12WPY38_69	276	1.118	11.25	0.1	0.487	0.0038	0.73008	2543.4	8.6	2557	16	2514.4	4.1	2514.4	4.1	1.69424	Single Age
12WPY38_70	20.31	0.834	0.775	0.02	0.0917	0.0011	0.037795	581	11	565.7	6.7	630	38	565.7	6.7	2.63339	Single Age
12WPY38_71	254.3	2.131	0.7388	0.0087	0.09161	0.0008	0.62233	561.4	5.1	565	4.7	537.1	9	565	4.7	0.641254	Single Age
12WPY38_72	47.9	1.284	1.131	0.016	0.1291	0.0016	0.29429	767.6	7.8	782.8	9.1	719	18	782.8	9.1	1.9802	Single Age
12WPY38_73	326.1	1.68	1.996	0.014	0.1921	0.0018	0.66813	1113.9	4.7	1132.8	9.6	1057.2	6.5	1132.8	9.6	1.69674	Single Age
12WPY38_74	115	1	1.739	0.021	0.1724	0.0023	0.60667	1022.4	7.8	1027	13	1016.5	9.1	1027	13	0.449922	Single Age
12WPY38_75	353	2.28	1.19	0.027	0.1331	0.0021	0.88244	794	13	807	12	744	14	807	12	1.63728	Single Age
12WPY38_76	104.1	1.744	1.0058	0.0098	0.11577	0.00093	0.33637	706.5	4.9	706.1	5.4	695	12	706.1	5.4	0.0566171	Single Age
12WPY38_77	113.3	0.4764	1.012	0.012	0.1178	0.0011	0.49024	709.8	5.9	717.9	6.4	666	12	717.9	6.4	1.14117	Single Age
12WPY38_78	49.3	1.396	1.451	0.024	0.1459	0.0018	0.61304	911	10	878	10	977	17	878	10	3.62239	Single Age
12WPY38_79	146	1.83	12.26	0.15	0.5028	0.0036	0.52157	2625	12	2625	16	2627.1	8.9	2627.1	8.9	0.0799361	Single Age
12WPY38_80	88.4	1.385	5.2	0.068	0.3205	0.0027	0.67448	1852	11	1792	13	1885.5	7.8	1885.5	7.8	4.9589	Single Age
12WPY38_81	58.2	0.9205	5.499	0.086	0.3445	0.0046	0.88334	1901	13	1911	21	1878	7.4	1878	7.4	1.75719	Single Age
12WPY38_82	156.2	1.91	9.718	0.077	0.3772	0.0029	0.79217	2409.9	7	2063	14	2641.3	5.2	2641.3	5.2	21.8945	Single Age
12WPY38_83	94.7	1.28	1.002	0.016	0.1164	0.0013	0.71395	704.1	7.9	709.9	7.2	680	13	709.9	7.2	0.823747	Single Age
12WPY38_84	97.8	1.63	1.516	0.058	0.1563	0.004	0.94034	940	23	935	22	941	21	935	22	0.531915	Single Age
12WPY38_85	108	1.54	1.662	0.081	0.1641	0.007	0.97382	985	32	978	39	1008	21	978	39	0.71066	Single Age
12WPY38_86	40.5	1.177	0.976	0.017	0.1138	0.0014	0.42752	693.2	9.1	695.7	8.4	663	18	695.7	8.4	0.360646	Single Age
12WPY38_87	293	0.2167	12.91	0.11	0.514	0.0046	0.57088	2674.2	8	2673	19	2668.4	8.7	2668.4	8.7	0.172388	Single Age
12WPY38_88	611	9.02	0.9139	0.0085	0.1124	0.0012	0.65427	659	4.5	686.5	6.7	555.7	9.4	686.5	6.7	4.17299	Single Age
12WPY38_89	247.6	1.131	0.899	0.0079	0.10653	0.00065	0.45663	651	4.2	652.6	3.8	643.8	9.8	652.6	3.8	0.245776	Single Age
12WPY38_90	252	2.495	0.987	0.013	0.1145	0.0016	0.79834	696.9	6.5	698.6	9.5	666	11	698.6	9.5	0.243937	Single Age
12WPY38_91	420	1110	0.9591	0.0079	0.1135	0.0014	0.76936	682.7	4.1	692.7	8.1	648.5	8	692.7	8.1	1.46477	Single Age
12WPY38_92	295	2.43	1.421	0.022	0.151	0.002	0.86789	897.6	9.3	907	11	913.3	9	907	11	1.04724	Single Age
12WPY38_93	146	1.31	1.578	0.023	0.1659	0.0024	0.76379	961.9	9.1	989	13	897.5	9.5	989	13	2.81734	Single Age
12WPY38_94	152	3.61	1.597	0.02	0.1622	0.0014	0.7035	968.7	7.9	968.7	7.7	948.1	8.9	968.7	7.7	0	Single Age
12WPY38_95	636	1.456	0.8157	0.0059	0.10073	0.00072	0.59055	605.6	3.3	618.6	4.2	540.8	6.1	618.6	4.2	2.14663	Single Age
12WPY38_96	112.1	0.713	1.1154	0.0094	0.1255	0.0011	0.52806	760.6	4.5	762.2	6.3	746.3	9.9	762.2	6.3	0.21036	Single Age
12WPY38_97	263	16.5	0.95	0.011	0.1126	0.0011	0.68788	677.9	5.9	688	6.5	639	11	688	6.5	1.4899	Single Age
12WPY38_98	70.3	1.438	4.682	0.047	0.3157	0.0034	0.7506	1763.4	8.4	1768	17	1745.3	5.9	1745.3	5.9	1.30064	Single Age
12WPY38_99	82.4	1.06	12.48	0.13	0.5002	0.0053	0.89768	2643.4	9.7	2614	23	2647.7	4.6	2647.7	4.6	1.2728	Single Age
12WPY38_100	76.8	0.744	0.956	0.017	0.1121	0.001	0.48225	680.5	8.6	685	5.8	670	21	685	5.8	0.661278	Single Age
12WPY38_101	179	1.29	0.93	0.027	0.1114	0.0014	0.61576	670	15	681	7.9	684	32	681	7.9	1.64179	Single Age
12WPY38_102	109.6	0.537	1.69	0.018	0.1697	0.0015	0.65875	1005.3	6.7	1010.2	8.3	986	11	1010.2	8.3	0.487417	Single Age
12WPY38_103	257	0.859	0.8426	0.0083	0.10196	0.00089	0.67477	620.4	4.5	625.9	5.2	598.6	8.4	625.9	5.2	0.886525	Single Age
12WPY38_104	387	1.285	0.9729	0.0091	0.1156	0.001	0.45811	689.8	4.7	705.3	6	633	11	705.3	6	2.24703	Single Age
12WPY38_105	45.9	0.2327	1.139	0.018	0.1253	0.0013	0.2665	771.6	8.4	761.2	7.4	809	20	761.2	7.4	1.34785	Single Age
12WPY38_106	16.6	0.5218	1.215	0.03	0.1357	0.0023	0.3335	809	13	822	12	735	32	822	12	1.60692	Single Age
12WPY38_107	33.7	0.687	11.728	0.098	0.4836	0.0051	0.51158	2582.4	7.9	2542	22	2615.6	7.2	2615.6	7.2	2.81389	Single Age
12WPY38_108	127.5	0.2969	0.982	0.022	0.10049	0.00091	0.39398	693	11	617.2	5.3	957	33	DISC	DISC	10.938	Single Age
12WPY38_109	51.1	1.434	2.198	0.028	0.2021	0.0021	0.51058	1179.7	9	1187	11	1161	12	1187	11	0.618801	Single Age
12WPY38_110	256	1.75	1.759	0.026	0.1758	0.0025	0.82653	1031	9.8	1044	14	987.5	9	1044	14	1.26091	Single Age
12WPY38_111	223.7	1.838	1.0349	0.0073	0.11724	0.00096	0.3603	721.3	3.7	714.6	5.5	739.7	9.1	714.6	5.5	0.928878	Single Age
12WPY38_112	665	2.206	1.0214	0.0067	0.12011	0.00083	0.52724	714.5	3.3	731.2	4.8	659.2	6.4	731.2	4.8	2.3373	Single Age
12WPY38_113	507	1.3569	1.2216	0.0076	0.13766	0.00086	0.4295	810.4	3.5	831.4	4.9	758.5	6.5	831.4	4.9	2.59131	Single Age
12WPY38_114	384	17.37	0.976	0.014	0.1186	0.0022	0.858	691.5	7.4	723	13	657.1	7.6	723	13	4.55531	Rim
12WPY38_114	355	1.209	1.35	0.02	0.1442	0.0024	0.80552	867.2	8.5	868	13	819	11	868	13	0.0922509	Core
12WPY38_115	285.9	2.42	1.623	0.014	0.1649	0.0011	0.5093	978.9	5.5	984	6.3	956.8	7	984	6.3	0.520993	Single Age
12WPY38_116	226	0.674	1.849	0.017	0.1843	0.0016	0.55386	1062.6	6	1090.5	8.8	990	9.8	1090.5	8.8	2.62564	Single Age
12WPY38_117	290	5.12	1.201	0.023	0.1282	0.0026	0.82843	800	10	777	15	843	16	777	15	2.875	Single Age
12WPY38_118	162	0.485	8.48	0.23	0.3813	0.0091	0.92979	2281	25	2081	43	2429	11	2429	11	14.3269	Single Age
12WPY38_119	81.1	0.3461	1.812	0.022	0.179	0.0018	0.5512	1049.2	7.9	1061.4	9.9	1029	12	1061.4	9.9	1.16279	Single Age
12WPY38_120	193	1.67	0.965	0.012	0.1151	0.0012	0.47961	685.5	6.3	702.1	6.8	638	14	702.1	6.8	2.42159	Single Age
12WPY38_121	291	2.32	0.862	0.014	0.1064	0.0017	0.77199	630.8	7.8	651.6	9.9	577	16	651.6	9.9	3.2974	Rim
12WPY38_121	181.2	1.475	1.569	0.03	0.1504	0.0015	0.56227	958	12	903.1	8.4	1042	22	903.1	8.4	5.73069	Core
12WPY38_122	335	7.9	1.436	0.031	0.1533	0.0024	0.84522	903	13	919	13	859	16	919	13	1.77187	Single Age
12WPY38_123	398	16.3	0.925	0.03	0.1139	0.0028	0.91099	664	16	695	16	622	18	695	16	4.66867	Rim
12WPY38_123	108.3	0.911	1.82	0.02	0.1787	0.0023	0.64934	1052.6	7.3	1060	13	1001	14	1060	13	0.703021	Core
12WPY38_124	54.3	5.51	0.976	0.024	0.1134	0.0026	0.62258	691	12	692	15	748	29	692	15	0.144718	Rim
12WPY38_124	23.2	1.667	1.384	0.037	0.1458	0.0036	0.38828	881	16	877	20	852	34	877	20	0.45403	Core
12WPY38_125	575	0.767	2.012	0.017	0.1986	0.0016	0.71538	1119.4	5.7	1167.7	8.7	1034.8	7.1	1167.7	8.7	4.31481	Single Age
13WPY04_1	62.8	0.638	0.914	0.017	0.1062	0.0014	0.18966	659.5	8.8	650.4	7.9	672	38	650.4	7.9	1.37983	Single Age
13WPY04_2	85.7	1.271	0.898	0.014	0.1011	0.0011	0.35888	650.2	7.7	621	6.5	764	31	621	6.5	4.49093	Single Age
13WPY04_3	411	5.32	0.7574	0.0097	0.0919	0.0011	0.56956	572.2	5.6	566.7	6.2	590	23	566.7	6.2	0.961202	Single Age
13WPY04_4	185.2	23.64	0.809	0.016	0.0978	0.0016	0.4377	601.7	9.1	601.3	9.3	609	37	601.3	9.3	0.0664783	Rim
13WPY04_4	52.2	0.99	1.502	0.071	0.1466	0.0041	0.48907	929	28	882	23	1031	66	882	23	5.0592	Core
13WPY04_5	30.02	0.404	0.836	0.026	0.0973	0.0018	0.03963	616	14	598	10	688	67	598	10	2.92208	Single Age
13WPY04_6	20.2	0.676	0.745	0.025	0.0906	0.0015	0.33933	567	14	559	9	588	73	559	9	1.41093	Single Age
13WPY04_7	294	8.96	0.86	0.025	0.1005	0.0022	0.84186	629	14	617	13	657	29	617	13	1.90779	Single Age
13WPY04_8	118.8	1.331	1.559	0.021	0.1573	0.0019	0.65119	953.6	8.3	941	11	980	21	941	11	1.32131	Single Age
13WPY04_9	113.6	1.013	9.14	0.12	0.3827	0.0045	0.80843	2350	12	2088	21	2586	13	2586	13	19.2575	Single Age
13WPY04_10	358	1.499	0.8923	0.0088	0.1039	0.001	0.66966	647.4	4.7	637.9	5.8	685	15	637.9	5.8	1.46741	Single Age
13WPY04_11	78.3	0.3276	4.901	0.049	0.3116	0.0031	0.53891	1801.9	8.4	1748	15	1867	17	1867	17	6.37386	Single Age
13WPY04_12	792	5.07	7.257	0.085	0.3781	0.0052	0.93111	2142	11	2067	24	2212	10	2212	10	6.55515	Single Age
13WPY04_13	99.3	0.851	0.926	0.046	0.1015	0.0015	0.62163	661	22	623	9	767	76	623	9	5.74887	Single Age
13WPY04_14	445	2.648	0.8838	0.0087	0.1044	0.0012	0.75056	642.8	4.7	641.1	6.9	658	16	641.1	6.9	0.264468	Single Age
13WPY04_15	174.7	1.1365	6.821	0.051	0.3829	0.0032	0.67111	2088	6.6	2089	15	2089	11	2089	11	0	Single Age
13WPY04_16	329	2.25	0.9175	0.009	0.10726	0.00096	0.5873	660.8	4.8	656.8	5.6	672	17	656.8	5.6	0.605327	Single Age
13WPY04_17	135.2	0.1782	1.491	0.019	0.1515	0.0019	0.59674	926.3	7.8	909	11	971	24	909	11	1.86765	Single Age
13WPY04_18	119.9	1.407	1.431	0.019	0.1451	0.0017	0.43875	901.5	7.9	873.5	9.5	950	24	873.5	9.5	3.10593	Single Age
13WPY04_19	82.4	3.875	0.681	0.011	0.085	0.0011	0.39606	526.8	6.9	525.7	6.4	539	36	525.7	6.4	0.208808	Single Age
13WPY04_20	626	5.65	0.6689	0.0068	0.08479	0.00084	0.68712	519.9	4.1	524.6	5	510	17	524.6	5	0.90402	Single Age
13WPY04_21	216	1.69	0.7545	0.009	0.0923	0.0011	0.71199	570.6	5.2	569.3	6.6	573	20	569.3	6.6	0.22783	Single Age
13WPY04_22	443	2.6	0.902	0.013	0.1057	0.0017	0.67001	652.3	6.8	647.8	9.7	675	26	647.8	9.7	0.689867	Single Age
13WPY04_23	456	1.661	7.28	0.059	0.3708	0.0037	0.79484	2145.8	7.2	2033	17	2263.6	9.9	2263.6	9.9	10.1873	Single Age
13WPY04_24	308	2.67	0.864	0.012	0.1019	0.0017	0.38341	632.1	6.7	626	10	668	35	626	10	0.965037	Single Age
13WPY04_25	189	0.601	5.049	0.054	0.3198	0.0039	0.78822	1826.8	9.1	1791	19	1870	13	1870	13	4.2246	Single Age
13WPY04_26	93	0.915	1.691	0.018	0.1646	0.002	0.49024	1006.8	7.3	983	11	1072	24	983	11	2.36393	Single Age
13WPY04_27	402	2.06	0.8884	0.0081	0.10457	0.00084	0.61856	645.3	4.3	641.1	4.9	679	17	641.1	4.9	0.65086	Single Age
13WPY04_28	194.3	1.32	0.7468	0.0093	0.09001	0.00093	0.38757	566.8	5.2	555.5	5.5	599	28	555.5	5.5	1.99365	Single Age
13WPY04_29	111.6	1.163	4.382	0.062	0.277	0.0038	0.82876	1708	12	1576	19	1868	14	1868	14	15.6317	Single Age
13WPY04_30	173	0.859	0.771	0.011	0.0939	0.0013	0.52035	580.2	6.1	579.6	7.8	574	27	579.6	7.8	0.103413	Single Age
13WPY04_31	49.3	37	1.179	0.061	0.1288	0.0042	0.36047	786	28	785	23	806	80	785	23	0.127226	Single Age
13WPY04_32	156	0.442	0.786	0.013	0.0943	0.0013	0.56873	589.2	7.6	580.7	7.9	614	31	580.7	7.9	1.44263	Single Age
13WPY04_33	113	0.73	1.793	0.027	0.1714	0.0027	0.52025	1042.3	9.7	1020	15	1084	30	1020	15	2.1395	Single Age
13WPY04_34	115.1	0.433	4.969	0.046	0.3064	0.0033	0.75171	1813.6	7.9	1722	16	1918	15	1918	15	10.219	Single Age
13WPY04_35	104.2	2.191	1.228	0.016	0.1329	0.0014	0.1647	813	7.5	804.4	7.7	827	28	804.4	7.7	1.05781	Single Age
13WPY04_36	159	1.02	5.767	0.079	0.3439	0.0047	0.83187	1944	12	1905	23	1983	14	1983	14	3.93343	Single Age
13WPY04_37	89.4	2.019	1.157	0.017	0.1277	0.0013	0.4513	781.9	7.9	774.7	7.6	780	30	774.7	7.6	0.920834	Single Age
13WPY04_38	138.7	3.88	1.23	0.041	0.1315	0.0036	0.5018	811	19	796	21	815	33	796	21	1.84957	Single Age
13WPY04_39	164	1.47	1.605	0.024	0.1606	0.0027	0.79526	972.5	9.6	960	15	1012	19	960	15	1.28535	Single Age
13WPY04_40	174.2	1.072	1.682	0.017	0.1657	0.0013	0.92384	1001.5	6.5	988.1	7.3	1032	16	988.1	7.3	1.33799	Single Age
13WPY04_41	286	1.297	0.959	0.015	0.1093	0.001	0.61758	682.7	7.9	668.6	6	730	26	668.6	6	2.06533	Single Age
13WPY04_42	151.4	0.842	10.8	0.2	0.4457	0.0079	0.96321	2504	18	2374	35	2611.5	8.7	2611.5	8.7	9.09439	Single Age
13WPY04_43	151.6	0.2848	1.696	0.016	0.168	0.0014	0.53292	1006.9	6	1001.2	7.8	1034	19	1001.2	7.8	0.566094	Single Age
13WPY04_44	141.5	0.873	1.63	0.031	0.1595	0.0026	0.39617	980	12	954	15	1020	29	954	15	2.65306	Single Age
13WPY04_45	238	2.82	0.979	0.015	0.1092	0.0021	0.48835	692.6	7.7	668	12	769	28	668	12	3.55183	Single Age
13WPY04_46	90	192	0.778	0.033	0.0899	0.002	0.1879	583	18	555	12	677	65	555	12	4.80274	Rim
13WPY04_46	30.8	0.42	4.34	0.19	0.2842	0.0091	0.91795	1699	36	1611	46	1784	43	1784	43	9.69731	Core
13WPY04_47	85	2.54	1.651	0.032	0.1561	0.0024	0.14341	989	12	935	13	1118	44	935	13	5.46006	Single Age
13WPY04_48	157	0.729	4.66	0.11	0.2841	0.0067	0.95234	1759	20	1610	34	1916	14	1916	14	15.9708	Single Age
13WPY04_49	904	4.3	1.27	0.091	0.105	0.0027	0.52586	832	42	643	16	1400	120	DISC	DISC	22.7163	Single Age
13WPY04_50	221	2.95	4.76	0.11	0.2911	0.0054	0.89706	1776	21	1646	27	1945	23	1945	23	15.3728	Single Age
13WPY04_51	19.8	0.549	0.951	0.039	0.1065	0.0036	0.63694	675	20	652	21	771	56	652	21	3.40741	Single Age
13WPY04_52	105.2	1.143	0.922	0.013	0.1088	0.0011	0.38313	662.7	6.6	666.9	6.7	653	30	666.9	6.7	0.633771	Single Age
13WPY04_53	151	2.51	0.7641	0.0094	0.09275	0.00099	0.46045	576.1	5.4	571.8	5.9	590	27	571.8	5.9	0.746398	Single Age
13WPY04_54	158.8	2.06	4.44	0.13	0.2864	0.0076	0.94329	1713	25	1621	38	1820	21	1820	21	10.9341	Single Age
13WPY04_55	171.4	2.35	1.378	0.019	0.1407	0.0021	0.79007	879.3	8.3	848	12	934	24	848	12	3.55965	Single Age
13WPY04_56	64.7	2.078	1.25	0.018	0.1339	0.0014	0.2218	822.9	8.1	809.7	8	843	31	809.7	8	1.60408	Single Age
13WPY04_57	90	1.63	0.974	0.018	0.1097	0.0019	0.58168	689.7	9	671	11	742	39	671	11	2.71132	Single Age
13WPY04_58	44	0.519	4.69	0.057	0.2999	0.0029	0.68548	1766	10	1690	14	1841	18	1841	18	8.20206	Single Age
13WPY04_59	82.7	0.588	12	0.14	0.4921	0.0084	0.73758	2603	11	2578	36	2624	19	2624	19	1.75305	Single Age
13WPY04_60	297.9	1.013	0.89	0.012	0.101	0.0013	0.42478	645.8	6.5	620.5	7.4	701	29	620.5	7.4	3.91762	Single Age
13WPY04_61	317	1.254	1.666	0.017	0.167	0.0017	0.65467	995.4	6.6	995.2	9.3	1001	18	995.2	9.3	0.0200924	Single Age
13WPY04_62	332.8	1.853	1.385	0.035	0.1403	0.0029	0.90232	881	15	846	17	945	25	846	17	3.97276	Single Age
13WPY04_63	67.2	1.34	0.961	0.023	0.1097	0.0018	0.50858	684	12	671	10	727	34	671	10	1.90058	Single Age
13WPY04_64	182	1.718	3.396	0.027	0.2578	0.0021	0.73009	1503	6.2	1480	11	1533	11	1533	11	3.45727	Single Age
13WPY04_65	115.9	0.85	6.72	0.1	0.3513	0.0057	0.69565	2076	13	1940	27	2202	19	2202	19	11.8983	Single Age
13WPY04_66	165.6	0.803	26.74	0.26	0.647	0.0058	0.80041	3374.9	9.6	3216	23	3457.1	9.5	3457.1	9.5	6.97405	Single Age
13WPY04_67	55	5.34	0.791	0.021	0.0902	0.0019	0.18864	591	12	557	11	745	86	557	11	5.75296	Single Age
13WPY04_68	140	0.8419	0.84	0.012	0.1006	0.0012	0.81808	618.5	6.7	618.1	7	613	26	618.1	7	0.0646726	Single Age
13WPY04_69	65.7	0.8991	11.15	0.16	0.4681	0.0057	0.90073	2541	13	2474	25	2576	11	2576	11	3.95963	Single Age
13WPY04_70	139	0.484	11.41	0.11	0.4643	0.0049	0.84658	2557.6	8.8	2458	21	2631.3	9.5	2631.3	9.5	6.5861	Single Age
13WPY04_71	270	11.27	0.8762	0.0087	0.1026	0.00097	0.205	638.7	4.7	629.6	5.7	658	21	629.6	5.7	1.42477	Single Age
13WPY04_72	55.2	1.028	1.629	0.033	0.1627	0.0021	0.42803	980	13	971	11	1008	35	971	11	0.918367	Single Age
13WPY04_73	72.5	0.8227	1.759	0.023	0.17	0.002	0.45445	1030.9	8.5	1012	11	1065	24	1012	11	1.83335	Single Age
13WPY04_74	259.2	3.11	0.812	0.01	0.09735	0.00096	0.50241	603	5.7	599.6	5.5	629	22	599.6	5.5	0.563847	Single Age
13WPY04_75	102.7	0.885	1.707	0.023	0.1679	0.0023	0.59148	1010.5	8.6	1000	13	1041	22	1000	13	1.03909	Single Age
13WPY04_76	62.1	1.222	6.86	0.13	0.3793	0.006	0.9265	2091	17	2072	28	2108	16	2108	16	1.70778	Single Age
13WPY04_77	75	0.508	0.79	0.013	0.0947	0.001	0.35182	590.5	7.4	583	5.9	617	36	583	5.9	1.27011	Single Age
13WPY04_78	194	0.755	5.207	0.037	0.3264	0.0029	0.90197	1853.5	6.1	1820	14	1897.2	9	1897.2	9	4.06915	Single Age
13WPY04_79	269	1.39	0.906	0.013	0.1073	0.0013	0.73582	654.7	6.8	657	7.4	658	22	657	7.4	0.351306	Single Age
13WPY04_81	245	0.63	0.8003	0.008	0.1	0.001	0.55023	596.8	4.5	614.3	6	539	23	614.3	6	2.93231	Single Age
13WPY04_82	73	0.551	1.695	0.023	0.1671	0.0022	0.50587	1007.3	8.6	996	12	1010	26	996	12	1.12181	Single Age
13WPY04_83	74.6	0.5738	0.85	0.013	0.0986	0.001	0.044006	624.1	7.4	605.9	5.9	681	40	605.9	5.9	2.9162	Single Age
13WPY04_84	194	3.649	0.7209	0.0093	0.0889	0.0014	0.72609	551.6	5.3	548.7	8.2	568	23	548.7	8.2	0.525743	Single Age
13WPY04_85	138.9	1.459	0.982	0.014	0.1096	0.0011	0.39576	694	7.1	671.1	6.5	771	28	671.1	6.5	3.29971	Single Age
13WPY04_86	84	0.778	0.826	0.018	0.0981	0.0016	0.17377	611.9	9.6	603.1	9.2	619	39	603.1	9.2	1.43814	Single Age
13WPY04_87	136.5	0.75	1.68	0.018	0.1631	0.002	0.58818	1001.8	7.1	974	11	1055	21	974	11	2.775	Single Age
13WPY04_88	90.9	0.8674	1.679	0.022	0.1634	0.0018	0.31847	999.9	8.3	976	10	1052	29	976	10	2.39024	Single Age
13WPY04_89	30	0.839	1.674	0.037	0.1662	0.0038	0.52792	998	14	990	21	1025	49	990	21	0.801603	Single Age
13WPY04_90	502	7.8	0.973	0.02	0.1103	0.0021	0.86056	690	10	674	12	725	21	674	12	2.31884	Rim
13WPY04_90	76.2	1.576	1.429	0.036	0.1477	0.003	0.58209	901	15	888	17	913	34	888	17	1.44284	Core
13WPY04_91	200	1.49	5.267	0.056	0.3173	0.0037	0.8817	1862.9	9	1776	18	1961	10	1961	10	9.43396	Single Age
13WPY04_92	192.1	1.411	7.93	0.1	0.374	0.0059	0.80594	2222	12	2048	28	2382	16	2382	16	14.0218	Single Age
13WPY04_93	630	30.45	0.7067	0.0074	0.08598	0.00093	0.73928	543.1	4.5	531.6	5.5	587	16	531.6	5.5	2.11747	Single Age
13WPY04_94	480	1.428	0.9714	0.0098	0.11264	0.00093	0.73732	689.6	5.1	688	5.4	702	17	688	5.4	0.232019	Single Age
13WPY04_95	219.1	1.448	0.803	0.012	0.0955	0.0012	0.68838	600.8	6.8	588	6.9	638	23	588	6.9	2.13049	Single Age
13WPY04_96	15.16	1.382	1.576	0.057	0.1593	0.003	0.11305	951	19	952	17	965	66	952	17	0.105152	Single Age
13WPY04_97	210	2.18	1.547	0.018	0.1588	0.0015	0.53334	949	7	950.1	8.3	940	20	950.1	8.3	0.115911	Single Age
13WPY04_98	32.8	0.447	1.468	0.034	0.1452	0.002	0.011689	916	14	874	11	1004	51	874	11	4.58515	Single Age
13WPY04_100	215	1.021	10.7	0.23	0.4385	0.0089	0.94198	2495	20	2342	40	2609	12	2609	12	10.2338	Single Age
13WPY04_101	65.4	1.163	5.92	0.059	0.3574	0.0043	0.84427	1963.6	8.7	1969	21	1964	13	1964	13	0.254582	Single Age
13WPY04_102	57.7	0.497	1.222	0.036	0.1229	0.0034	0.60457	816	17	747	19	1053	48	747	19	8.45588	Rim
13WPY04_102	34.8	0.767	1.801	0.042	0.1773	0.0036	0.62588	1045	15	1052	19	1039	42	1052	19	0.669856	Core
13WPY04_103	49.2	1.59	14.49	0.23	0.5202	0.0074	0.83936	2781	15	2699	31	2830	20	2830	20	4.62898	Single Age
13WPY04_104	196	1.62	1.534	0.03	0.1551	0.0023	0.81969	943	12	929	13	957	18	929	13	1.48462	Single Age
13WPY04_105	364	1.555	6.27	0.16	0.3374	0.008	0.96467	2020	21	1877	38	2179	10	2179	10	13.8596	Single Age
13WPY04_106	63.4	0.996	1.244	0.023	0.1349	0.0021	0.40794	820	10	815	12	849	41	815	12	0.609756	Single Age
13WPY04_107	714	1.639	12.5	0.13	0.4861	0.0063	0.85659	2642	10	2553	27	2714	10	2714	10	5.9322	Single Age
13WPY04_108	96	0.62	3.952	0.076	0.2614	0.0045	0.88389	1622	15	1496	23	1807	16	1807	16	17.2108	Single Age
13WPY04_109	323	19.5	6.294	0.089	0.3705	0.0078	0.71422	2017	12	2031	36	2020	17	2020	17	0.544554	Rim
13WPY04_109	250.5	1.301	13.21	0.15	0.5137	0.0071	0.79337	2694	11	2672	30	2711	14	2711	14	1.43858	Core
13WPY04_110	397	3.6	1.039	0.016	0.1175	0.0017	0.78988	723.3	7.9	717.9	9.5	748	22	717.9	9.5	0.746578	Rim
13WPY04_110	99.7	0.934	1.541	0.039	0.1602	0.0022	0.69001	946	16	958	12	937	36	958	12	1.2685	Core
13WPY04_111	127.6	0.841	0.902	0.011	0.1042	0.0012	0.52628	652.6	5.8	639.9	7	685	25	639.9	7	1.94606	Single Age
13WPY04_112	167	1.175	1.415	0.021	0.1469	0.0022	0.88465	894.9	8.9	884	12	922	24	884	12	1.21801	Single Age
13WPY04_113	33.1	0.397	1.757	0.037	0.1703	0.0023	0.27899	1028	13	1014	13	1045	39	1014	13	1.36187	Single Age
13WPY04_114	148.5	1.539	0.993	0.015	0.1139	0.0017	0.73999	700.9	8	695.1	9.8	711	26	695.1	9.8	0.827507	Single Age
13WPY04_115	77.7	0.955	7.46	0.21	0.3325	0.0089	0.95145	2171	26	1848	43	2478	17	2478	17	25.4237	Single Age
13WPY04_116	167	0.717	1.833	0.02	0.1779	0.0018	0.61854	1056.8	7.2	1055.6	9.9	1049	17	1055.6	9.9	0.11355	Single Age
13WPY04_117	114.4	0.673	1.713	0.017	0.17	0.0015	0.13299	1013.1	6.3	1012	8.1	1020	24	1012	8.1	0.108578	Single Age
13WPY04_118	140	4.27	11.58	0.2	0.4897	0.0054	0.8285	2568	16	2569	23	2576	18	2576	18	0.271739	Single Age
13WPY04_119	142	1.618	1.473	0.02	0.1507	0.0021	0.68196	919	8.4	905	12	942	17	905	12	1.52339	Single Age
13WPY04_120	263	0.873	1.258	0.013	0.1294	0.0013	0.27357	827.5	6.1	784.6	7.6	952	26	784.6	7.6	5.18429	Single Age
13WPY04_121	48.2	1.548	0.858	0.016	0.1006	0.0012	0.28912	629.3	8.7	617.6	7.3	656	43	617.6	7.3	1.85921	Single Age
13WPY04_122	180	0.744	9.11	0.22	0.41	0.0071	0.91866	2350	22	2213	33	2459	16	2459	16	10.0041	Single Age
13WPY04_123	543	2.15	0.7336	0.0064	0.09042	0.00069	0.65048	558.5	3.8	558	4.1	572	15	558	4.1	0.0895255	Single Age
13WPY04_124	71.7	0.8	5.169	0.07	0.3114	0.0042	0.86476	1849	12	1747	21	1970	15	1970	15	11.3198	Single Age

## Sheet: U-Pb Carboniferous
Carboniferous unit zircon U-Pb data
Sample_Grain #	[U] ppm	U/Th	207/235	2σ error	206/238	2σ error	RHO	207/235 Age (Ma)	2σ error	206/238 Age (Ma)	2σ error	207/206 Age (Ma)	2σ error	Best age (Ma)	2σ error	% Discordance*	Rim/Core
12WPY20_1	1104	3.97	0.37	0.0045	0.04893	0.00052	0.79261	319.5	3.3	307.9	3.2	416	16	307.9	3.2	3.63067	Single Age
12WPY20_2	278.1	2.059	0.5324	0.0072	0.06711	0.00076	0.20901	433.2	4.8	418.7	4.6	492	25	418.7	4.6	3.34718	Single Age
12WPY20_3	728	36.4	0.839	0.018	0.0996	0.002	0.89816	621.1	8.6	612	12	639	25	612	12	1.46514	Rim
12WPY20_3	524	21.4	4.44	0.14	0.2765	0.0063	0.93287	1716	27	1573	32	1900	22	1900	22	17.2105	Core
12WPY20_4	805	1.1	0.7413	0.0063	0.08899	0.0008	0.71869	563.1	3.7	549.6	4.7	631	14	549.6	4.7	2.39744	Single Age
12WPY20_5	830	15	0.865	0.024	0.098	0.0015	0.77452	633	13	602.8	8.9	730	43	602.8	8.9	4.77093	Rim
12WPY20_5	160.8	1.19	1.231	0.022	0.1341	0.0022	0.71549	814	10	811	13	825	24	811	13	0.36855	Core
12WPY20_6	193	3.341	0.581	0.0066	0.07442	0.00052	0.24599	464.9	4.2	462.7	3.2	468	27	462.7	3.2	0.47322	Single Age
12WPY20_7	253	1.089	1.0702	0.0069	0.12061	0.00074	0.50883	738.7	3.4	734.1	4.3	759	13	734.1	4.3	0.622716	Single Age
12WPY20_8	75.9	1.707	0.73	0.021	0.0883	0.0015	0.588	556	12	545.1	9	588	42	545.1	9	1.96043	Single Age
12WPY20_9	777	2.23	0.6454	0.0043	0.07852	0.00051	0.3543	506	2.7	487.3	3.1	579	16	487.3	3.1	3.69565	Single Age
12WPY20_10	1140	14.9	0.33	0.013	0.0424	0.0015	0.92288	289.7	9.9	267.4	9.5	425	32	267.4	9.5	7.69762	Rim
12WPY20_10	382	0.744	0.657	0.012	0.0763	0.0013	0.73548	512.3	7.2	473.7	7.7	644	27	473.7	7.7	7.53465	Core
12WPY20_11	158.2	15.59	0.944	0.011	0.1106	0.0011	0.16896	674.7	5.9	676.4	6.2	658	27	676.4	6.2	0.251964	Single Age
12WPY20_12	119.7	0.639	1.681	0.017	0.1669	0.0022	0.63594	1001	6.4	995	12	999	20	995	12	0.599401	Single Age
12WPY20_13	165	1.1	1.408	0.021	0.1404	0.0022	0.91507	891.7	8.9	846	12	974	11	846	12	5.12504	Single Age
12WPY20_14	244	2.74	0.982	0.008	0.11405	0.0008	0.49832	694.5	4.1	696.2	4.6	690	14	696.2	4.6	0.24478	Single Age
12WPY20_15	320	15	0.941	0.019	0.1105	0.0024	0.5496	673.3	9.7	676	14	692	38	676	14	0.40101	Rim
12WPY20_15	175.2	1.77	3.13	0.12	0.1868	0.0049	0.85613	1438	29	1104	26	1946	36	DISC	DISC	23.2267	Core
12WPY20_16	140.7	1.316	1.138	0.014	0.1348	0.0014	0.54269	771.1	6.6	815.4	7.8	640	24	815.4	7.8	5.74504	Single Age
12WPY20_17	56.7	277	0.943	0.013	0.1117	0.001	0.50137	675	6.5	682.8	6	639	25	682.8	6	1.15556	Single Age
12WPY20_18	316	5.75	0.703	0.015	0.086	0.0013	0.89437	540.1	9	531.7	7.8	582	20	531.7	7.8	1.55527	Single Age
12WPY20_19	718	2.64	0.6515	0.0069	0.07875	0.00086	0.83847	509.2	4.2	488.6	5.1	595	12	488.6	5.1	4.04556	Single Age
12WPY20_20	141.5	0.885	5.115	0.055	0.3211	0.0025	0.8706	1837.9	9.1	1795	12	1871	11	1871	11	4.062	Single Age
12WPY20_21	158.9	0.667	0.8587	0.0084	0.1021	0.00072	0.31106	629.2	4.6	626.7	4.2	634	25	626.7	4.2	0.39733	Single Age
12WPY20_22	610	3.87	0.682	0.065	0.076	0.0039	0.84835	525	39	478	21	770	120	478	21	8.95238	Rim
12WPY20_22	322	2.55	6.999	0.09	0.3036	0.0044	0.85316	2113	11	1709	22	2524	13	DISC	DISC	32.29	Core
12WPY20_23	225.7	10.52	4.67	0.12	0.2887	0.009	0.8175	1759	22	1633	45	1936	33	1936	33	15.6508	Single Age
12WPY20_24	151	1.81	0.5919	0.0069	0.07592	0.00099	0.71532	472.4	4.5	471.7	5.9	464	22	471.7	5.9	0.14818	Single Age
12WPY20_25	1240	3.31	0.324	0.011	0.043	0.0015	0.90343	284.1	8.1	271.5	9.1	369	28	271.5	9.1	4.43506	Single Age
12WPY20_26	277.7	1.647	4.766	0.061	0.2829	0.0036	0.89508	1778	11	1605	18	1984	17	1984	17	19.1028	Single Age
12WPY20_27	146	2.6	0.98	0.017	0.1178	0.0021	0.71575	694	9.2	718	12	632	32	718	12	3.45821	Single Age
12WPY20_28	167	29.2	0.8953	0.0099	0.10608	0.00089	0.48787	649.7	5.4	649.9	5.2	653	22	649.9	5.2	0.0307834	Single Age
12WPY20_29	267	3.68	0.616	0.015	0.0796	0.0016	0.67201	487.2	9.3	494	9.8	480	46	494	9.8	1.39573	Rim
12WPY20_29	271.8	1.093	0.891	0.012	0.1051	0.0011	0.67692	646.9	6.3	644.1	6.4	652	20	644.1	6.4	0.432834	Core
12WPY20_30	166	3.26	0.6305	0.0093	0.0809	0.0011	0.76656	498.8	6	501.6	6.7	476	23	501.6	6.7	0.561347	Single Age
12WPY20_31	1462	51	0.387	0.016	0.0506	0.0017	0.88044	332	12	318	11	400	45	318	11	4.21687	Rim
12WPY20_31	269	2.81	0.5717	0.0069	0.07395	0.00083	0.6551	459	4.4	459.9	5	461	21	459.9	5	0.196078	Core
12WPY20_32	237	1.63	7.79	0.13	0.4164	0.0072	0.80315	2207	15	2243	33	2163	20	2163	20	3.69857	Single Age
12WPY20_33	116.3	1.214	1.555	0.018	0.16	0.0013	0.46308	953	7.1	956.4	7	933	20	956.4	7	0.356768	Single Age
12WPY20_34	244	0.6849	0.4041	0.005	0.0557	0.00057	0.61761	344.5	3.6	349.4	3.5	325	23	349.4	3.5	1.42235	Single Age
12WPY20_35	222	2.97	0.807	0.018	0.0985	0.0024	0.64073	603	11	606	14	571	38	606	14	0.497512	Single Age
12WPY20_36	60.2	17.4	0.814	0.012	0.0984	0.001	0.19567	604.5	6.5	606.3	5.8	601	34	606.3	5.8	0.297767	Single Age
12WPY20_37	522	1.926	0.5898	0.0098	0.0749	0.0011	0.88925	470.3	6.3	465.5	6.8	491	16	465.5	6.8	1.02063	Single Age
12WPY20_38	315	0.508	0.9865	0.0071	0.1146	0.0011	0.57142	697.4	3.8	700	6.4	690	17	700	6.4	0.372813	Single Age
12WPY20_39	746	20.7	0.876	0.032	0.0997	0.003	0.93539	638	17	613	17	723	29	613	17	3.9185	Rim
12WPY20_39	112.5	0.79	1.621	0.018	0.1656	0.0018	0.37507	978.2	7	988	9.9	975	28	988	9.9	1.00184	Core
12WPY20_40	205.2	8.57	0.622	0.024	0.0782	0.0022	0.36528	491	15	485	13	511	62	485	13	1.222	Rim
12WPY20_40	442	2.69	3.98	0.2	0.2377	0.0095	0.97736	1620	42	1372	50	1968	22	DISC	DISC	30.2846	Core
12WPY20_41	56.3	0.642	7.394	0.051	0.4104	0.003	0.54797	2160.8	6.3	2216	14	2121	11	2121	11	4.47902	Single Age
12WPY20_42	604	0.7	0.3885	0.0078	0.0525	0.001	0.91927	333	5.7	329.9	6.2	371	15	329.9	6.2	0.930931	Single Age
12WPY20_43	334	6.07	1.0299	0.0094	0.116	0.001	0.69934	718.7	4.7	707.7	5.9	761	14	707.7	5.9	1.53054	Single Age
12WPY20_44	95.3	0.547	1.136	0.013	0.1264	0.0011	0.52661	771.2	6	767.1	6.2	774	23	767.1	6.2	0.531639	Single Age
12WPY20_45	496	2.12	0.578	0.011	0.0731	0.0012	0.87407	464	7.2	455.7	7.2	491	23	455.7	7.2	1.78879	Single Age
12WPY20_46	237	5.7	0.577	0.028	0.0752	0.0016	0.63524	462	18	467.1	9.6	442	86	467.1	9.6	1.1039	Rim
12WPY20_46	372.6	1.146	0.954	0.011	0.1085	0.001	0.86524	679.8	5.8	664.3	5.9	731	14	664.3	5.9	2.28008	Core
12WPY20_47	879	1.831	0.7609	0.0075	0.0907	0.0011	0.80693	574.9	4.4	559.6	6.6	630	16	559.6	6.6	2.66133	Single Age
12WPY20_48	179	6.82	1.108	0.016	0.131	0.0021	0.8316	759.4	7.7	794	12	664	20	794	12	4.55623	Single Age
12WPY20_49	567	1.041	1.175	0.017	0.1275	0.0019	0.4607	788.3	8.1	774	11	828	16	774	11	1.81403	Single Age
12WPY20_50	726	4.94	0.3825	0.009	0.0519	0.0013	0.89857	330.3	6.9	325.8	7.9	368	24	325.8	7.9	1.3624	Single Age
12WPY20_51	864	12.71	0.543	0.014	0.0651	0.0014	0.93813	439.3	9.2	406.5	8.5	627	19	406.5	8.5	7.46642	Single Age
12WPY20_52	677	1.083	0.3857	0.0066	0.0515	0.00078	0.83391	331	4.8	323.7	4.8	389	19	323.7	4.8	2.20544	Single Age
12WPY20_53	179	6.4	0.982	0.062	0.1145	0.005	0.27547	694	32	699	29	680	140	699	29	0.720461	Rim
12WPY20_53	209	0.76	1.676	0.021	0.1684	0.0016	0.18624	998.8	8.1	1003.3	8.6	993	19	1003.3	8.6	0.450541	Core
12WPY20_54	367	2.52	0.4105	0.008	0.0551	0.0012	0.72596	349.7	5.6	345.5	7.3	361	34	345.5	7.3	1.20103	Single Age
12WPY20_55	201	1.84	1.126	0.013	0.1271	0.0013	0.8193	767.7	5.8	771.3	7.3	751	17	771.3	7.3	0.468933	Single Age
12WPY20_56	558	7.58	0.826	0.014	0.0984	0.0017	0.92798	610.6	8	605	10	636	14	605	10	0.917131	Single Age
12WPY20_57	306	26.4	0.416	0.015	0.0561	0.0023	0.68454	353	11	352	14	367	70	352	14	0.283286	Rim
12WPY20_57	40.9	2.73	0.644	0.021	0.0822	0.0024	0.74327	503	13	509	14	488	45	509	14	1.19284	Core
12WPY20_58	602	8.28	0.443	0.018	0.058	0.0024	0.78393	372	13	364	15	426	73	364	15	2.15054	Rim
12WPY20_58	221.9	1.783	0.683	0.0095	0.0866	0.00096	0.72612	528.3	5.7	535.4	5.7	501	24	535.4	5.7	1.34393	Core
12WPY20_59	272	2.562	1.88	0.013	0.184	0.0016	0.64646	1074	4.5	1088.8	8.8	1045	14	1088.8	8.8	1.37803	Single Age
12WPY20_60	244	2.2	0.5934	0.0068	0.077	0.00067	0.45635	472.9	4.3	478.2	4	461	25	478.2	4	1.12074	Single Age
12WPY20_61	133.6	0.722	0.9002	0.0096	0.1057	0.001	0.44732	651.6	5.1	648	5.8	658	21	648	5.8	0.552486	Single Age
12WPY20_62	357	3.21	8.4	0.2	0.372	0.0079	0.93175	2271	22	2037	37	2486	14	2486	14	18.0611	Single Age
12WPY20_63	265.1	1.509	0.4202	0.0046	0.05746	0.00049	0.5259	356.1	3.3	360.1	3	331	20	360.1	3	1.12328	Single Age
12WPY20_64	143.4	2.182	8.006	0.075	0.417	0.0041	0.50589	2231	8.4	2251	19	2202	16	2202	16	2.22525	Single Age
12WPY20_69	408	17.5	4.82	0.19	0.2851	0.0087	0.97532	1785	33	1615	43	1963	17	1963	17	17.728	Single Age
12WPY20_70	453	0.669	0.7957	0.0092	0.0951	0.0011	0.76765	594.2	5.2	585.5	6.3	634	16	585.5	6.3	1.46415	Single Age
12WPY20_71	204	1.726	0.989	0.021	0.1034	0.0011	0.22547	697	11	634.4	6.6	910	46	634.4	6.6	8.98135	Single Age
12WPY20_72	33	1.329	1.677	0.031	0.1722	0.0027	0.56496	1000	11	1024	15	949	30	1024	15	2.4	Single Age
12WPY20_73	1430	1.46	0.3409	0.0043	0.04622	0.00057	0.74584	297.8	3.2	291.3	3.5	349	16	291.3	3.5	2.18267	Rim
12WPY20_73	467	1.069	0.4052	0.008	0.0551	0.0011	0.84391	345.3	5.8	345.9	6.9	346	26	345.9	6.9	0.173762	Core
[truncated: 63 more rows]

## Sheet: U-Pb Permian
Permian unit zircon U-Pb data
[truncated: 127 more rows]

## Sheet: U-Pb Triassic
Triassic unit zircon U-Pb data
[truncated: 372 more rows]

[truncated: 1 more sheets: U-Pb Cretaceous]
